# Supplementary material for: Distinct but overlapping roles of LRRTM1 and LRRTM2 in developing and mature hippocampal circuits
Source: eLife. 2022 Jun 6;11:e64742. doi: 10.7554/eLife.64742 (PMC9170246; doi:10.7554/eLife.64742)
Supplement: Figure 1—figure supplement 2—source data 2. [file elife-64742-fig1-figsupp2-data2.xlsx]

## Sheet: Sheet1
					Control																		DKO
Bassoon	0.952049	0.78454	0.882944	1.38047															1.10638	0.675306	1.09787	1.08687
CASK	1.00643	1.31144	0.760277	1.09022	1.2326	0.599031													1.25827	1.0683	1.03107	0.890501	1.56389	0.86594	1.02116
Gephyrin	0.768455	0.788643	1.12074	0.894568	0.936257	0.871709	1.47	1.14963											0.876901	0.723758	0.740663	0.869894	0.864375	0.99328	1.33973	1.09886
GluA2	1.26172	0.289737	1.07915	1.36939															1.64434	0.914069	0.898436	0.508088
LRRTM4	1.05364	1.17908	0.80508	0.739832	0.653123	0.934149	1.01442	1.86535	1.00457	0.750751									1.42048	1.65651	0.928016	1.03049	1.67147	1.34577	1.12217	0.644361	0.927849	1.24735
Neuroligin1	1.56893	0.726182	2.02869	0.90486	0.882827	0.679285	1.14555	1.41392	0.986018	0.626232	1.00031	0.648567	0.649441	0.40431	1.56041	0.774468			1.09451	0.435322	1.88048	1.57655	1.47783	0.610658	0.73928	1.09889	0.945582	0.916106	0.984048	1.01643	0.606459	0.463733	1.26707	0.85974
Neuroligin3	1.14219	1.27852	1.14697	0.432319															0.906645	1.27132	0.879632	0.639588
GluN1	1.17443	1.35952	1.36959	0.495591	0.894924	0.632954	1.14337	0.929625											0.584881	1.92522	1.49255	1.1469	0.944245	0.496474	0.8647	0.656729
GluN2A	0.970854	0.935022	0.861529	1.2326															1.4208	0.913293	0.924732	1.10682
PSD95	1.05537	0.894663	0.729768	0.810038	1.08189	1.42827													0.997131	0.768294	0.984794	1.12988	0.603453	0.971013	0.797886
SAPAP	1.05876	0.865464	0.962175	1.1136															0.536348	0.979871	1.30371	0.943425
SHANK	1.28223	0.878433	0.849089	0.990244															1.10973	0.786826	1.36854
SNAP25	2.00028	0.668108	1.11268	0.667893	0.761476	0.758307	1.55959	0.47166											0.928937	0.760857	1.49016	0.884027	1.05561	0.693736	1.25695	0.358205
Synapsin	1.21338	0.913886	0.872729																0.662029	0.633845	1.03424
Synaptophysin	0.973271	0.890129	0.978074	1.15853															1.13765	1.10797	1.17893
Syngap	1.45153	0.736062	0.779807	1.0326															1.07599	0.840837	0.623326	1.29966
TrkC	1.99741	0.709548	0.628008	0.66503															1.46334	0.979893	0.52655	0.834967
VAMP2	1.01971	1.84552	0.838014	0.802077	0.766848	1.86336	1.0304	0.521571	1.16987	0.467781	0.701304	0.973543							0.283148	1.76889	0.760012	1.03627	0.984244	1.16619	1.23816	0.448938	1.29961	0.547762	0.682513	1.16552
VGlut1	0.993616	0.667983	1.43566	0.902745															0.981207	0.960138	0.791032	1.19902
