# Supplementary material for: Distinct but overlapping roles of LRRTM1 and LRRTM2 in developing and mature hippocampal circuits
Source: eLife. 2022 Jun 6;11:e64742. doi: 10.7554/eLife.64742 (PMC9170246; doi:10.7554/eLife.64742)
Supplement: Figure 1—figure supplement 3—source data 1. [file elife-64742-fig1-figsupp3-data1.xlsx]

## Sheet: GAD65
GAD65			WT						DKO
oriens	369308	313881	454071	505228	387945		516494	490390	337853	325872	479592
radiatum	348753	404987	490875	284963	376459		458950	370992	449876	269674	340945
lacunosum	487545	393753	508338	519367	497857		519057	485743	408354	389345	569845
Pyramidale	609345	519754	533478	550930	480934		633475	504938	544785	588741	548720
MML	193754	174964	193784	150923	103842		164548	180498	108375	193455	119899
