# Supplementary material for: Distinct but overlapping roles of LRRTM1 and LRRTM2 in developing and mature hippocampal circuits
Source: eLife. 2022 Jun 6;11:e64742. doi: 10.7554/eLife.64742 (PMC9170246; doi:10.7554/eLife.64742)
Supplement: Figure 1—figure supplement 3—source data 2. [file elife-64742-fig1-figsupp3-data2.xlsx]

## Sheet: Sheet1
GAD65		Control				DKO
IML	10.4575	7.95369	9.13564		9.87117	11.5507	9.99076
MML	10.1249	8.76995	8.95006		10.4947	10.6742	10.3097
OML	11.6003	10.162	12.1341		12.7096	10.5836	10.3313
Note: data are per mouse
