# Supplementary material for: Distinct but overlapping roles of LRRTM1 and LRRTM2 in developing and mature hippocampal circuits
Source: eLife. 2022 Jun 6;11:e64742. doi: 10.7554/eLife.64742 (PMC9170246; doi:10.7554/eLife.64742)
Supplement: Figure 1—source data 1. [file elife-64742-fig1-data1.xlsx]

## Sheet: VGLUT1
VGLUT1			WT						DKO
oriens	660567	525486	577634	558752	619458		508753	418764	469764	567405	437983
radiatum	470758	374443	423099	601441	452384		233185	424111	277229	307421	285084
lacunosum	486524	559894	609931	517500	611938		476433	397342	480015	387432	458745
Note: Data are represented per mouse
