# Supplementary material for: Distinct but overlapping roles of LRRTM1 and LRRTM2 in developing and mature hippocampal circuits
Source: eLife. 2022 Jun 6;11:e64742. doi: 10.7554/eLife.64742 (PMC9170246; doi:10.7554/eLife.64742)
Supplement: Figure 1—source data 2. [file elife-64742-fig1-data2.xlsx]

## Sheet: Sheet1
VGLUT1		Control				DKO
IML	9.95914	10.6867	14.5935		12.6644	14.2589	12.6078
MML	10.3939	10.7384	11.5957		11.9479	9.79462	11.3072
OML	10.1838	11.3873	11.4706		13.425	12.11	14.7361
