# Supplementary material for: Distinct but overlapping roles of LRRTM1 and LRRTM2 in developing and mature hippocampal circuits
Source: eLife. 2022 Jun 6;11:e64742. doi: 10.7554/eLife.64742 (PMC9170246; doi:10.7554/eLife.64742)
Supplement: Figure 2—source data 1. [file elife-64742-fig2-data1.xlsx]

## Sheet: Sheet1
RADIATUM				RADIATUM	WT			RADIATUM	DKO			OLM WT				OLM DKO
WT	KO			Mouse 1	mouse 2	mouse3		Mouse 1	mouse 2	mouse3		Mouse 1	mouse 2	mouse3		Mouse 1	mouse 2	mouse3
1.00455	0.826087			1.00455	1.02304	1.2963		0.826087	1.08374	1.11765		1.39415	1.59385	1.4		1.22778	1.4238	1.31039
1.46667	1			1.46667	1.07419	1.17391		1	0.740724	1.3198		1.28079	1.324	1.2766		1.13636	1.0984	1.31455
1.43158	1.08483			1.43158	1.65746	1.02041		1.08483	0.732075	1.15607		1.2963	1.231	1.51642		1.11765	1.32098	1.10497
1.52074	0.952381			1.52074	1.65354	1.25		0.952381	0.873171	1.3399		1.17391	1.1	1.23153		1.3198	1.1	1.15789
1.68831	1.09453			1.68831	1.05966	1.12319		1.09453	1.00919	1.31313		1.02041	1.17391	1.31707		1.15607	1.3198	0.955414
1.59091	1.46919			1.59091	1.43564	1.16129		1.46919	1.0101	1.33663		1.25	1.02041	1.46667		1.3399	1.15607	1.3451
1.09039	1.19205			1.09039	1.4876	1.36187		1.19205	1.02597	1.4554		1.12319	1.25	1.25		1.31313	1.3399	1.2342
1.56896	1.07541			1.56896	1.06471	1.25828		1.07541	1.06761	1.23595		1.16129	1.12319	1.3341		1.03663	1.31313	1.12345
1.57143	1.08387			1.57143	1.41677	1.34454		1.08387	1.04224	1.20429		1.36187	1.16129	1.02436		1.4554	1.33663	1.20908
1.39922	1.07954			1.39922	1.58406	1.23377		1.07954	1.09298	0.962332		1.25828	1.36187	1.49284		1.23595	1.4554	1.31039
1.41463	0.766184			1.41463	1.24699	1.2766		0.766184	1.10435	1.31455		1.14454	1.25828	1.52345		1.20429	1.23595	1.0238
1.47465	1.03711			1.47465	1.43184	1.51642		1.03711	1.06126	1.10497		1.23377	1.34454	1.424		0.962332	1.20429	1.4984
1.417	0.757576			1.417	1.2341	1.23153		0.757576	1.08462	1.15789		1.2766	1.03377	1.231		1.31455	0.962332	1.32098
1.2	0.849057			1.2	1.08261	1.31707		0.849057	1.18644	0.955414		1.11642	1.2766	1.19735		1.10497	1.31455	1.12384
1.28295	1.00541			1.28295	0.532461	1.46667		1.00541	1.01868	1.3451		1.23153	1.11642	1.17391		1.15789	1.10497	1.3198
1.03729	1.08614			1.03729	1.46667	1.25		1.08614	1.06585	1.2342		1.31707	1.23153	1.42041		0.955414	1.15789	1.45607
1.20328	1.13281			1.20328	1.27488	1.0341		1.13281	0.60674	1.12345		1.46667	1.01707	1.25		1.3451	0.955414	1.3399
1.44931	1.07931			1.44931	1.07792	1.62437		1.07931	1.04615	1.20908		1.25	1.26667	1.12319		1.2342	1.3451	1.31313
1.49798	1.01074			1.49798	1.35767	1.4		1.01074	1.08343	1.31039		1.4341	1.25	1.16129		1.42345	1.2342	1.33663
1.00305	0.894737			1.00305	0.994152	1.5		0.894737	1.52778	1.0238		1.62437	1.5341	1.47645		1.20908	1.12345	1.38735
1.47044	0.671795			1.47044	1.28079	1.324		0.671795	1.13636	1.0984		1.4	1.62437	1.09347		1.31039	1.20908	1.08475
1.02304	1.08374			1.37064	1.25889	1.231		1.00708	1.02855	1.32098		1.27692	1.25204	1.30401		1.21716	1.22435	1.25096
1.07419	0.740724					1.1				1.1
1.65746	0.732075					1.2824				1.20606
1.65354	0.873171
1.05966	1.00919
1.43564	1.0101
1.4876	1.02597
1.06471	1.06761
1.41677	1.04224
1.58406	1.09298
1.24699	1.10435
1.43184	1.06126
1.2341	1.08462
1.08261	1.18644
0.532461	1.01868
1.46667	1.06585
1.27488	0.60674
1.07792	1.04615
1.35767	1.08343
0.994152	1.52778
1.28079	1.13636
1.2963	1.11765
1.17391	1.3198
1.02041	1.15607
1.25	1.3399
1.12319	1.31313
1.16129	1.33663
1.36187	1.4554
1.25828	1.23595
1.34454	1.20429
1.23377	0.962332
1.2766	1.31455
1.51642	1.10497
1.23153	1.15789
1.31707	0.955414
1.46667	1.3451
1.25	1.2342
1.0341	1.12345
1.62437	1.20908
1.4	1.31039
1.5	1.0238
1.324	1.0984
1.231	1.32098
1.1	1.1
