# Supplementary material for: Distinct but overlapping roles of LRRTM1 and LRRTM2 in developing and mature hippocampal circuits
Source: eLife. 2022 Jun 6;11:e64742. doi: 10.7554/eLife.64742 (PMC9170246; doi:10.7554/eLife.64742)
Supplement: Figure 2—source data 2. [file elife-64742-fig2-data2.xlsx]

## Sheet: DENSITY
LOW-MAG IMAGES (30000x) - SYNAPSE DENSITY
		PER MICROGRAPH					PER 100 um2
	WT	DHET	DKO			WT	DHET	DKO
Average (n=3):	12.6479	10.7242	8.39918		Average (n=3):	24.2839	20.5905	16.1264			WT:					HET:					KO:
S.E.M (n=3)	1.55307	0.947475	0.486045		S.E.M (n=3)	2.98189	1.81915	0.933207
											T1T2-374 WT - C1 - Oct 26 2011002	13	Local average			Oct 25 D1 - t1t376 het002	16	Local average			T1T2-441 KO C6 - Oct 26 2011002	11	Local average
											T1T2-374 WT - C1 - Oct 26 2011003	5	15.7436			Oct 25 D1 - t1t376 het003	9	12.54			T1T2-441 KO C6 - Oct 26 2011003	8	8.58824
											T1T2-374 WT - C1 - Oct 26 2011004	11	0.856599			Oct 25 D1 - t1t376 het004	8	0.443741			T1T2-441 KO C6 - Oct 26 2011004	9	0.39025
											T1T2-374 WT - C1 - Oct 26 2011005	19				Oct 25 D1 - t1t376 het005	14				T1T2-441 KO C6 - Oct 26 2011005	6
											T1T2-374 WT - C1 - Oct 26 2011006	9				Oct 25 D1 - t1t376 het006	17				T1T2-441 KO C6 - Oct 26 2011006	7
											T1T2-374 WT - C1 - Oct 26 2011007	8				Oct 25 D1 - t1t376 het007	11				T1T2-441 KO C6 - Oct 26 2011007	14
											T1T2-374 WT - C1 - Oct 26 2011008	17				Oct 25 D1 - t1t376 het008	15				T1T2-441 KO C6 - Oct 26 2011008	14
											T1T2-374 WT - C1 - Oct 26 2011009	7				Oct 25 D1 - t1t376 het009	13				T1T2-441 KO C6 - Oct 26 2011009	7
											T1T2-374 WT - C1 - Oct 26 2011010	17				Oct 25 D1 - t1t376 het010	10				T1T2-441 KO C6 - Oct 26 2011010	4
											T1T2-374 WT - C1 - Oct 26 2011011	13				Oct 25 D1 - t1t376 het011	14				T1T2-441 KO C6 - Oct 26 2011011	6
											T1T2-374 WT - C1 - Oct 26 2011012	18				Oct 25 D1 - t1t376 het012	9				T1T2-441 KO C6 - Oct 26 2011012	9
											T1T2-374 WT - C1 - Oct 26 2011013	20				Oct 25 D1 - t1t376 het013	11				T1T2-441 KO C6 - Oct 26 2011013	6
											T1T2-374 WT - C1 - Oct 26 2011014	17				Oct 25 D1 - t1t376 het014	12				T1T2-441 KO C6 - Oct 26 2011014	6
											T1T2-374 WT - C1 - Oct 26 2011015	13				Oct 25 D1 - t1t376 het015	11				T1T2-441 KO C6 - Oct 26 2011015	10
											T1T2-374 WT - C1 - Oct 26 2011016	15				Oct 25 D1 - t1t376 het016	13				T1T2-441 KO C6 - Oct 26 2011016	8
											T1T2-374 WT - C1 - Oct 26 2011017	34				Oct 25 D1 - t1t376 het017	9				T1T2-441 KO C6 - Oct 26 2011017	11
	WT	WT	WT	HET	HET	HET	KO	KO	KO		T1T2-374 WT - C1 - Oct 26 2011018	20				Oct 25 D1 - t1t376 het018	16				T1T2-441 KO C6 - Oct 26 2011018	8
Per micrograph	15.7436	11.32	10.88	12.54	9.34694	10.2857	8.58824	7.47887	9.13043		T1T2-374 WT - C1 - Oct 26 2011019	16				Oct 25 D1 - t1t376 het019	8				T1T2-441 KO C6 - Oct 26 2011019	10
	0.856599	0.488596	0.4709	0.443741	0.389653	0.422577	0.39025	0.317725	0.426585		T1T2-374 WT - C1 - Oct 26 2011020	20				Oct 25 D1 - t1t376 het020	13				T1T2-441 KO C6 - Oct 26 2011020	10
											T1T2-374 WT - C1 - Oct 26 2011021	18				Oct 25 D1 - t1t376 het021	14				T1T2-441 KO C6 - Oct 26 2011021	5
Per 100 um2	WT	WT	WT	HET	HET	HET	KO	KO	KO		T1T2-374 WT - C1 - Oct 26 2011022	13				Oct 25 D1 - t1t376 het022	14				T1T2-441 KO C6 - Oct 26 2011022	9
	30.2277	21.7344	20.8896	24.0768	17.9461	19.7486	16.4894	14.3594	17.5304		T1T2-374 WT - C1 - Oct 26 2011023	13				Oct 25 D1 - t1t376 het023	17				T1T2-441 KO C6 - Oct 26 2011023	13
	1.64467	0.938105	0.904128	0.851983	0.748133	0.811348	0.749281	0.610033	0.819043		T1T2-374 WT - C1 - Oct 26 2011024	13				Oct 25 D1 - t1t376 het024	8				T1T2-441 KO C6 - Oct 26 2011024	7
											T1T2-374 WT - C1 - Oct 26 2011025	17				Oct 25 D1 - t1t376 het025	9				T1T2-441 KO C6 - Oct 26 2011025	9
											T1T2-374 WT - C1 - Oct 26 2011026	14				Oct 25 D1 - t1t376 het026	16				T1T2-441 KO C6 - Oct 26 2011026	10
p-value WT vs. KO (n=3)											T1T2-374 WT - C1 - Oct 26 2011027	9				Oct 25 D1 - t1t376 het027	17				T1T2-441 KO C6 - Oct 26 2011027	11
0.100728											T1T2-374 WT - C1 - Oct 26 2011028	20				Oct 25 D1 - t1t376 het028	10				T1T2-441 KO C6 - Oct 26 2011028	9
											T1T2-374 WT - C1 - Oct 26 2011029	17				Oct 25 D1 - t1t376 het029	14				T1T2-441 KO C6 - Oct 26 2011029	7
p-value HET vs. KO (n=3)											T1T2-374 WT - C1 - Oct 26 2011030	19				Oct 25 D1 - t1t376 het030	12				T1T2-441 KO C6 - Oct 26 2011030	6
0.117442											T1T2-374 WT - C1 - Oct 26 2011031	13				Oct 25 D1 - t1t376 het031	5				T1T2-441 KO C6 - Oct 26 2011031	7
											T1T2-374 WT - C1 - Oct 26 2011032	15				Oct 25 D1 - t1t376 het032	9				T1T2-441 KO C6 - Oct 26 2011032	8
											T1T2-374 WT - C1 - Oct 26 2011033	17				Oct 25 D1 - t1t376 het033	10				T1T2-441 KO C6 - Oct 26 2011033	9
											T1T2-374 WT - C1 - Oct 26 2011034	12				Oct 25 D1 - t1t376 het034	11				T1T2-441 KO C6 - Oct 26 2011034	8
	0.673956										T1T2-374 WT - C1 - Oct 26 2011035	24				Oct 25 D1 - t1t376 het035	13				T1T2-441 KO C6 - Oct 26 2011035	4
	WT	DHET	DKO								T1T2-374 WT - C1 - Oct 26 2011036	13				Oct 25 D1 - t1t376 het036	15				T1T2-441 KO C6 - Oct 26 2011036	7
Net Average:	12.4218	10.7365	8.37173								T1T2-374 WT - C1 - Oct 26 2011037	17				Oct 25 D1 - t1t376 het037	15				T1T2-441 KO C6 - Oct 26 2011037	8
S.E.M:	0.373116	0.264905	0.225332								T1T2-374 WT - C1 - Oct 26 2011038	25				Oct 25 D1 - t1t376 het038	16				T1T2-441 KO C6 - Oct 26 2011038	6
			0.673956								T1T2-374 WT - C1 - Oct 26 2011039	12				Oct 25 D1 - t1t376 het039	13				T1T2-441 KO C6 - Oct 26 2011039	10
N (mice):	3	3	3	9							T1T2-374 WT - C1 - Oct 26 2011040	21				Oct 25 D1 - t1t376 het040	13				T1T2-441 KO C6 - Oct 26 2011040	16
N (pictures):	147	148	191	486												Oct 25 D1 - t1t376 het041	8				T1T2-441 KO C6 - Oct 26 2011041	15
N (synapses):	1826	1589	1599	5014							T1T373 WT - oct 18 2011002	12	Local average			Oct 25 D1 - t1t376 het042	10				T1T2-441 KO C6 - Oct 26 2011042	11
											T1T373 WT - oct 18 2011003	15	11.32			Oct 25 D1 - t1t376 het043	11				T1T2-441 KO C6 - Oct 26 2011043	8
											T1T373 WT - oct 18 2011004	10	0.488596			Oct 25 D1 - t1t376 het044	13				T1T2-441 KO C6 - Oct 26 2011044	12
											T1T373 WT - oct 18 2011005	10				Oct 25 D1 - t1t376 het045	12				T1T2-441 KO C6 - Oct 26 2011045	9
											T1T373 WT - oct 18 2011006	8				Oct 25 D1 - t1t376 het046	10				T1T2-441 KO C6 - Oct 26 2011046	3
											T1T373 WT - oct 18 2011007	8				Oct 25 D1 - t1t376 het047	16				T1T2-441 KO C6 - Oct 26 2011047	7
											T1T373 WT - oct 18 2011008	9				Oct 25 D1 - t1t376 het048	16				T1T2-441 KO C6 - Oct 26 2011048	9
											T1T373 WT - oct 18 2011009	11				Oct 25 D1 - t1t376 het049	15				T1T2-441 KO C6 - Oct 26 2011049	7
											T1T373 WT - oct 18 2011010	12				Oct 25 D1 - t1t376 het050	16				T1T2-441 KO C6 - Oct 26 2011050	11
											T1T373 WT - oct 18 2011011	12				Oct 25 D1 - t1t376 het051	20				T1T2-441 KO C6 - Oct 26 2011051	8
											T1T373 WT - oct 18 2011012	8									T1T2-441 KO C6 - Oct 26 2011052	5
											T1T373 WT - oct 18 2011013	8				T1T2-448 het D6 - Oct 26 2011002	5	Local average
											T1T373 WT - oct 18 2011014	7				T1T2-448 het D6 - Oct 26 2011003	11	9.34694			T1T2 495 - B1 - Dec1 2011001	11	Local average
											T1T373 WT - oct 18 2011015	12				T1T2-448 het D6 - Oct 26 2011004	10	0.389653			T1T2 495 - B1 - Dec1 2011002	11	7.47887
											T1T373 WT - oct 18 2011016	14				T1T2-448 het D6 - Oct 26 2011005	12				T1T2 495 - B1 - Dec1 2011003	9	0.317725
											T1T373 WT - oct 18 2011017	14				T1T2-448 het D6 - Oct 26 2011006	4				T1T2 495 - B1 - Dec1 2011004	11
											T1T373 WT - oct 18 2011018	18				T1T2-448 het D6 - Oct 26 2011007	9				T1T2 495 - B1 - Dec1 2011005	8
											T1T373 WT - oct 18 2011019	10				T1T2-448 het D6 - Oct 26 2011008	7				T1T2 495 - B1 - Dec1 2011006	7
											T1T373 WT - oct 18 2011020	10				T1T2-448 het D6 - Oct 26 2011009	10				T1T2 495 - B1 - Dec1 2011007	4
											T1T373 WT - oct 18 2011021	10				T1T2-448 het D6 - Oct 26 2011010	9				T1T2 495 - B1 - Dec1 2011008	8
											T1T373 WT - oct 18 2011022	6				T1T2-448 het D6 - Oct 26 2011011	12				T1T2 495 - B1 - Dec1 2011009	12
											T1T373 WT - oct 18 2011023	13				T1T2-448 het D6 - Oct 26 2011012	8				T1T2 495 - B1 - Dec1 2011010	9
											T1T373 WT - oct 18 2011024	11				T1T2-448 het D6 - Oct 26 2011013	11				T1T2 495 - B1 - Dec1 2011011	3
											T1T373 WT - oct 18 2011025	7				T1T2-448 het D6 - Oct 26 2011014	7				T1T2 495 - B1 - Dec1 2011012	6
											T1T373 WT - oct 18 2011026	9				T1T2-448 het D6 - Oct 26 2011015	10				T1T2 495 - B1 - Dec1 2011013	8
											T1T373 WT - oct 18 2011027	19				T1T2-448 het D6 - Oct 26 2011016	12				T1T2 495 - B1 - Dec1 2011014	11
											T1T373 WT - oct 18 2011028	13				T1T2-448 het D6 - Oct 26 2011017	12				T1T2 495 - B1 - Dec1 2011015	6
											T1T373 WT - oct 18 2011029	7				T1T2-448 het D6 - Oct 26 2011018	10				T1T2 495 - B1 - Dec1 2011016	6
											T1T373 WT - oct 18 2011030	15				T1T2-448 het D6 - Oct 26 2011019	13				T1T2 495 - B1 - Dec1 2011017	4
											T1T373 WT - oct 18 2011031	17				T1T2-448 het D6 - Oct 26 2011020	6				T1T2 495 - B1 - Dec1 2011018	3
											T1T373 WT - oct 18 2011032	11				T1T2-448 het D6 - Oct 26 2011021	11				T1T2 495 - B1 - Dec1 2011019	7
											T1T373 WT - oct 18 2011033	9				T1T2-448 het D6 - Oct 26 2011022	5				T1T2 495 - B1 - Dec1 2011020	7
											T1T373 WT - oct 18 2011034	12				T1T2-448 het D6 - Oct 26 2011023	11				T1T2 495 - B1 - Dec1 2011021	12
											T1T373 WT - oct 18 2011035	8				T1T2-448 het D6 - Oct 26 2011024	15				T1T2 495 - B1 - Dec1 2011022	9
											T1T373 WT - oct 18 2011036	9				T1T2-448 het D6 - Oct 26 2011025	7				T1T2 495 - B1 - Dec1 2011023	8
											T1T373 WT - oct 18 2011037	7				T1T2-448 het D6 - Oct 26 2011026	9				T1T2 495 - B1 - Dec1 2011024	7
											T1T373 WT - oct 18 2011038	7				T1T2-448 het D6 - Oct 26 2011027	13				T1T2 495 - B1 - Dec1 2011025	6
											T1T373 WT - oct 18 2011039	10				T1T2-448 het D6 - Oct 26 2011028	6				T1T2 495 - B1 - Dec1 2011026	6
											T1T373 WT - oct 18 2011040	21				T1T2-448 het D6 - Oct 26 2011029	9				T1T2 495 - B1 - Dec1 2011027	6
											T1T373 WT - oct 18 2011041	13				T1T2-448 het D6 - Oct 26 2011030	10				T1T2 495 - B1 - Dec1 2011028	6
											T1T373 WT - oct 18 2011042	9				T1T2-448 het D6 - Oct 26 2011031	9				T1T2 495 - B1 - Dec1 2011029	8
											T1T373 WT - oct 18 2011043	14				T1T2-448 het D6 - Oct 26 2011032	5				T1T2 495 - B1 - Dec1 2011030	4
											T1T373 WT - oct 18 2011044	10				T1T2-448 het D6 - Oct 26 2011033	8				T1T2 495 - B1 - Dec1 2011031	8
											T1T373 WT - oct 18 2011045	16				T1T2-448 het D6 - Oct 26 2011034	11				T1T2 495 - B1 - Dec1 2011032	11
											T1T373 WT - oct 18 2011046	7				T1T2-448 het D6 - Oct 26 2011035	7				T1T2 495 - B1 - Dec1 2011033	6
											T1T373 WT - oct 18 2011047	16				T1T2-448 het D6 - Oct 26 2011036	10				T1T2 495 - B1 - Dec1 2011034	9
											T1T373 WT - oct 18 2011048	14				T1T2-448 het D6 - Oct 26 2011037	7				T1T2 495 - B1 - Dec1 2011035	4
											T1T373 WT - oct 18 2011049	14				T1T2-448 het D6 - Oct 26 2011038	11				T1T2 495 - B1 - Dec1 2011036	8
											T1T373 WT - oct 18 2011050	13				T1T2-448 het D6 - Oct 26 2011039	9				T1T2 495 - B1 - Dec1 2011037	6
											T1T373 WT - oct 18 2011051	11				T1T2-448 het D6 - Oct 26 2011040	10				T1T2 495 - B1 - Dec1 2011038	6
																T1T2-448 het D6 - Oct 26 2011041	12				T1T2 495 - B1 - Dec1 2011039	5
											T1T2-457 WT E8 Nov 9 2011001	16	Local average			T1T2-448 het D6 - Oct 26 2011042	12				T1T2 495 - B1 - Dec1 2011040	3
											T1T2-457 WT E8 Nov 9 2011002	10	10.88			T1T2-448 het D6 - Oct 26 2011043	5				T1T2 495 - B1 - Dec1 2011041	5
											T1T2-457 WT E8 Nov 9 2011003	10	0.4709			T1T2-448 het D6 - Oct 26 2011044	11				T1T2 495 - B1 - Dec1 2011042	8
											T1T2-457 WT E8 Nov 9 2011004	8				T1T2-448 het D6 - Oct 26 2011045	4				T1T2 495 - B1 - Dec1 2011043	11
											T1T2-457 WT E8 Nov 9 2011005	15				T1T2-448 het D6 - Oct 26 2011046	6				T1T2 495 - B1 - Dec1 2011044	8
											T1T2-457 WT E8 Nov 9 2011006	8				T1T2-448 het D6 - Oct 26 2011047	14				T1T2 495 - B1 - Dec1 2011045	9
											T1T2-457 WT E8 Nov 9 2011007	13				T1T2-448 het D6 - Oct 26 2011048	12				T1T2 495 - B1 - Dec1 2011046	8
											T1T2-457 WT E8 Nov 9 2011008	8				T1T2-448 het D6 - Oct 26 2011049	12				T1T2 495 - B1 - Dec1 2011047	9
											T1T2-457 WT E8 Nov 9 2011009	8				T1T2-448 het D6 - Oct 26 2011050					T1T2 495 - B1 - Dec1 2011048	7
											T1T2-457 WT E8 Nov 9 2011010	7				T1T2-448 het D6 - Oct 26 2011051	9				T1T2 495 - B1 - Dec1 2011049	6
											T1T2-457 WT E8 Nov 9 2011011	14									T1T2 495 - B1 - Dec1 2011050	5
											T1T2-457 WT E8 Nov 9 2011012	12				T1T2 - 440 HET B6 Nov 3 2011004	10	Local average			T1T2 495 - B1 - Dec1 2011051	8
											T1T2-457 WT E8 Nov 9 2011013	14				T1T2 - 440 HET B6 Nov 3 2011005	9	10.2857			T1T2 495 - B1 - Dec1 2011052	14
											T1T2-457 WT E8 Nov 9 2011014	12				T1T2 - 440 HET B6 Nov 3 2011006	13	0.422577			T1T2 495 - B1 - Dec1 2011053	11
											T1T2-457 WT E8 Nov 9 2011015	8				T1T2 - 440 HET B6 Nov 3 2011007	12				T1T2 495 - B1 - Dec1 2011054	3
											T1T2-457 WT E8 Nov 9 2011016	6				T1T2 - 440 HET B6 Nov 3 2011008	10				T1T2 495 - B1 - Dec1 2011055	14
											T1T2-457 WT E8 Nov 9 2011017	14				T1T2 - 440 HET B6 Nov 3 2011009	4				T1T2 495 - B1 - Dec1 2011056	10
											T1T2-457 WT E8 Nov 9 2011018	12				T1T2 - 440 HET B6 Nov 3 2011010	7				T1T2 495 - B1 - Dec1 2011057	7
											T1T2-457 WT E8 Nov 9 2011019	7				T1T2 - 440 HET B6 Nov 3 2011011	12				T1T2 495 - B1 - Dec1 2011058	11
											T1T2-457 WT E8 Nov 9 2011020	7				T1T2 - 440 HET B6 Nov 3 2011012	7				T1T2 495 - B1 - Dec1 2011059	7
											T1T2-457 WT E8 Nov 9 2011021	11				T1T2 - 440 HET B6 Nov 3 2011013	9				T1T2 495 - B1 - Dec1 2011060	2
											T1T2-457 WT E8 Nov 9 2011022	8				T1T2 - 440 HET B6 Nov 3 2011014	14				T1T2 495 - B1 - Dec1 2011061	9
											T1T2-457 WT E8 Nov 9 2011023	5				T1T2 - 440 HET B6 Nov 3 2011015	12				T1T2 495 - B1 - Dec1 2011062	9
											T1T2-457 WT E8 Nov 9 2011024	8				T1T2 - 440 HET B6 Nov 3 2011016	12				T1T2 495 - B1 - Dec1 2011063	4
											T1T2-457 WT E8 Nov 9 2011025	5				T1T2 - 440 HET B6 Nov 3 2011017	11				T1T2 495 - B1 - Dec1 2011064	6
											T1T2-457 WT E8 Nov 9 2011026	9				T1T2 - 440 HET B6 Nov 3 2011018	7				T1T2 495 - B1 - Dec1 2011065	9
											T1T2-457 WT E8 Nov 9 2011027	9				T1T2 - 440 HET B6 Nov 3 2011019	10				T1T2 495 - B1 - Dec1 2011066	5
											T1T2-457 WT E8 Nov 9 2011028	12				T1T2 - 440 HET B6 Nov 3 2011020	6				T1T2 495 - B1 - Dec1 2011067	8
											T1T2-457 WT E8 Nov 9 2011029	18				T1T2 - 440 HET B6 Nov 3 2011021	7				T1T2 495 - B1 - Dec1 2011068	9
											T1T2-457 WT E8 Nov 9 2011030	9				T1T2 - 440 HET B6 Nov 3 2011022	8				T1T2 495 - B1 - Dec1 2011069	6
											T1T2-457 WT E8 Nov 9 2011031	14				T1T2 - 440 HET B6 Nov 3 2011023	7				T1T2 495 - B1 - Dec1 2011070	10
											T1T2-457 WT E8 Nov 9 2011032	14				T1T2 - 440 HET B6 Nov 3 2011024	10				T1T2 495 - B1 - Dec1 2011071	4
											T1T2-457 WT E8 Nov 9 2011033	11				T1T2 - 440 HET B6 Nov 3 2011025	13
											T1T2-457 WT E8 Nov 9 2011034	9				T1T2 - 440 HET B6 Nov 3 2011026	16				T1T2 497 - C1 - Dec1 2011001	8	Local average
											T1T2-457 WT E8 Nov 9 2011035	14				T1T2 - 440 HET B6 Nov 3 2011027	10				T1T2 497 - C1 - Dec1 2011002	11	9.13043
											T1T2-457 WT E8 Nov 9 2011036	7				T1T2 - 440 HET B6 Nov 3 2011028	12				T1T2 497 - C1 - Dec1 2011003	10	0.426585
											T1T2-457 WT E8 Nov 9 2011037	8				T1T2 - 440 HET B6 Nov 3 2011029	9				T1T2 497 - C1 - Dec1 2011004	10
											T1T2-457 WT E8 Nov 9 2011038	12				T1T2 - 440 HET B6 Nov 3 2011030	13				T1T2 497 - C1 - Dec1 2011005	6
											T1T2-457 WT E8 Nov 9 2011039	16				T1T2 - 440 HET B6 Nov 3 2011031	11				T1T2 497 - C1 - Dec1 2011006	13
											T1T2-457 WT E8 Nov 9 2011040	13				T1T2 - 440 HET B6 Nov 3 2011032	11				T1T2 497 - C1 - Dec1 2011007	12
											T1T2-457 WT E8 Nov 9 2011041	13				T1T2 - 440 HET B6 Nov 3 2011033	16				T1T2 497 - C1 - Dec1 2011008	10
											T1T2-457 WT E8 Nov 9 2011042	16				T1T2 - 440 HET B6 Nov 3 2011034	11				T1T2 497 - C1 - Dec1 2011009	12
											T1T2-457 WT E8 Nov 9 2011043	9				T1T2 - 440 HET B6 Nov 3 2011035	9				T1T2 497 - C1 - Dec1 2011010	12
											T1T2-457 WT E8 Nov 9 2011044	11				T1T2 - 440 HET B6 Nov 3 2011036	5				T1T2 497 - C1 - Dec1 2011011	14
											T1T2-457 WT E8 Nov 9 2011045	14				T1T2 - 440 HET B6 Nov 3 2011037	8				T1T2 497 - C1 - Dec1 2011012	11
											T1T2-457 WT E8 Nov 9 2011046	14				T1T2 - 440 HET B6 Nov 3 2011038	13				T1T2 497 - C1 - Dec1 2011013	16
											T1T2-457 WT E8 Nov 9 2011047	16				T1T2 - 440 HET B6 Nov 3 2011039	13				T1T2 497 - C1 - Dec1 2011014	12
											T1T2-457 WT E8 Nov 9 2011048	14				T1T2 - 440 HET B6 Nov 3 2011040	14				T1T2 497 - C1 - Dec1 2011015	10
											T1T2-457 WT E8 Nov 9 2011049	10				T1T2 - 440 HET B6 Nov 3 2011041	9				T1T2 497 - C1 - Dec1 2011016	9
											T1T2-457 WT E8 Nov 9 2011050	6				T1T2 - 440 HET B6 Nov 3 2011042	9				T1T2 497 - C1 - Dec1 2011017	8
											T1T2-457 WT E8 Nov 9 2011051	10				T1T2 - 440 HET B6 Nov 3 2011043	14				T1T2 497 - C1 - Dec1 2011018	4
											T1T2-457 WT E8 Nov 9 2011052	13				T1T2 - 440 HET B6 Nov 3 2011044	11				T1T2 497 - C1 - Dec1 2011019	7
											T1T2-457 WT E8 Nov 9 2011053	13				T1T2 - 440 HET B6 Nov 3 2011045	5				T1T2 497 - C1 - Dec1 2011020	12
											T1T2-457 WT E8 Nov 9 2011054	13				T1T2 - 440 HET B6 Nov 3 2011046	15				T1T2 497 - C1 - Dec1 2011021	10
											T1T2-457 WT E8 Nov 9 2011055	14				T1T2 - 440 HET B6 Nov 3 2011047	7				T1T2 497 - C1 - Dec1 2011022	11
											T1T2-457 WT E8 Nov 9 2011056	7				T1T2 - 440 HET B6 Nov 3 2011048	13				T1T2 497 - C1 - Dec1 2011023	8
											T1T2-457 WT E8 Nov 9 2011057	23				T1T2 - 440 HET B6 Nov 3 2011049	14				T1T2 497 - C1 - Dec1 2011024	5
											T1T2-457 WT E8 Nov 9 2011058	9				T1T2 - 440 HET B6 Nov 3 2011050	8				T1T2 497 - C1 - Dec1 2011025	5
																T1T2 - 440 HET B6 Nov 3 2011051	11				T1T2 497 - C1 - Dec1 2011026	8
																T1T2 - 440 HET B6 Nov 3 2011052	7				T1T2 497 - C1 - Dec1 2011027	9
																					T1T2 497 - C1 - Dec1 2011028	7
																					T1T2 497 - C1 - Dec1 2011029	8
																					T1T2 497 - C1 - Dec1 2011030	7
																					T1T2 497 - C1 - Dec1 2011031	16
																					T1T2 497 - C1 - Dec1 2011032	11
																					T1T2 497 - C1 - Dec1 2011033	6
																					T1T2 497 - C1 - Dec1 2011034	9
																					T1T2 497 - C1 - Dec1 2011035	6
																					T1T2 497 - C1 - Dec1 2011036	3
																					T1T2 497 - C1 - Dec1 2011037	10
																					T1T2 497 - C1 - Dec1 2011038	2
																					T1T2 497 - C1 - Dec1 2011039	3
																					T1T2 497 - C1 - Dec1 2011040	4
																					T1T2 497 - C1 - Dec1 2011041	11
																					T1T2 497 - C1 - Dec1 2011042	7
																					T1T2 497 - C1 - Dec1 2011043	8
																					T1T2 497 - C1 - Dec1 2011044	14
																					T1T2 497 - C1 - Dec1 2011045	11
																					T1T2 497 - C1 - Dec1 2011046	11
																					T1T2 497 - C1 - Dec1 2011047	10
																					T1T2 497 - C1 - Dec1 2011048	8
																					T1T2 497 - C1 - Dec1 2011049	7
																					T1T2 497 - C1 - Dec1 2011050	9
																					T1T2 497 - C1 - Dec1 2011051	17
																					T1T2 497 - C1 - Dec1 2011052	10
																					T1T2 497 - C1 - Dec1 2011053	6
																					T1T2 497 - C1 - Dec1 2011054	11
																					T1T2 497 - C1 - Dec1 2011055	4
																					T1T2 497 - C1 - Dec1 2011056	2
																					T1T2 497 - C1 - Dec1 2011057	9
																					T1T2 497 - C1 - Dec1 2011058	9
																					T1T2 497 - C1 - Dec1 2011059	9
																					T1T2 497 - C1 - Dec1 2011060	17
																					T1T2 497 - C1 - Dec1 2011061	19
																					T1T2 497 - C1 - Dec1 2011062	7
																					T1T2 497 - C1 - Dec1 2011063	12
																					T1T2 497 - C1 - Dec1 2011064	6
																					T1T2 497 - C1 - Dec1 2011065	7
																					T1T2 497 - C1 - Dec1 2011066	7
																					T1T2 497 - C1 - Dec1 2011067	7
																					T1T2 497 - C1 - Dec1 2011068	11
																					T1T2 497 - C1 - Dec1 2011069	9

## Sheet: DENSITY (2)
LOW-MAG IMAGES (30000x) - SYNAPSE DENSITY
		PER MICROGRAPH						PER 100 um2
	WT	DHET	DKO				WT	DHET	DKO
Average (n=3):	12.5158	11.1932	#REF!	#REF!		Average (n=3):	23.9764	20.5905	16.1264				WT:					HET:					KO:
S.E.M (n=3)	1.39352	0.947475	0.486045			S.E.M (n=3)	2.67556	1.81915	0.933207
													T1T2-374 WT - C1 - Oct 26 2011002	13	Local average			Oct 25 D1 - t1t376 het002	16	Local average			T1T2-441 KO C6 - Oct 26 2011002	11	Local average
													T1T2-374 WT - C1 - Oct 26 2011003	5	15.2632			Oct 25 D1 - t1t376 het003	9	12.54			T1T2-441 KO C6 - Oct 26 2011003	8	8.58824
													T1T2-374 WT - C1 - Oct 26 2011004	11	0.728103			Oct 25 D1 - t1t376 het004	8	0.443741			T1T2-441 KO C6 - Oct 26 2011004	9	0.39025
													T1T2-374 WT - C1 - Oct 26 2011005	19				Oct 25 D1 - t1t376 het005	14				T1T2-441 KO C6 - Oct 26 2011005	6
													T1T2-374 WT - C1 - Oct 26 2011006	9				Oct 25 D1 - t1t376 het006	17				T1T2-441 KO C6 - Oct 26 2011006	7
													T1T2-374 WT - C1 - Oct 26 2011007	8				Oct 25 D1 - t1t376 het007	11				T1T2-441 KO C6 - Oct 26 2011007	14
													T1T2-374 WT - C1 - Oct 26 2011008	17				Oct 25 D1 - t1t376 het008	15				T1T2-441 KO C6 - Oct 26 2011008	14
													T1T2-374 WT - C1 - Oct 26 2011009	7				Oct 25 D1 - t1t376 het009	13				T1T2-441 KO C6 - Oct 26 2011009	7
													T1T2-374 WT - C1 - Oct 26 2011010	17				Oct 25 D1 - t1t376 het010	10				T1T2-441 KO C6 - Oct 26 2011010	4
													T1T2-374 WT - C1 - Oct 26 2011011	13				Oct 25 D1 - t1t376 het011	14				T1T2-441 KO C6 - Oct 26 2011011	6
													T1T2-374 WT - C1 - Oct 26 2011012	18				Oct 25 D1 - t1t376 het012	9				T1T2-441 KO C6 - Oct 26 2011012	9
													T1T2-374 WT - C1 - Oct 26 2011013	20				Oct 25 D1 - t1t376 het013	11				T1T2-441 KO C6 - Oct 26 2011013	6
													T1T2-374 WT - C1 - Oct 26 2011014	17				Oct 25 D1 - t1t376 het014	12				T1T2-441 KO C6 - Oct 26 2011014	6
													T1T2-374 WT - C1 - Oct 26 2011015	13				Oct 25 D1 - t1t376 het015	11				T1T2-441 KO C6 - Oct 26 2011015	10
													T1T2-374 WT - C1 - Oct 26 2011016	15				Oct 25 D1 - t1t376 het016	13				T1T2-441 KO C6 - Oct 26 2011016	8
													T1T2-374 WT - C1 - Oct 26 2011017					Oct 25 D1 - t1t376 het017	9				T1T2-441 KO C6 - Oct 26 2011017	11
	WT	WT	WT		HET	HET	HET		KO	KO	KO		T1T2-374 WT - C1 - Oct 26 2011018	20				Oct 25 D1 - t1t376 het018	16				T1T2-441 KO C6 - Oct 26 2011018	8
Per micrograph	15.2632	11.32	10.88	12.6	12.54	9.34694	10.2857	12.6	8.58824	7.47887	9.13043	#REF!	T1T2-374 WT - C1 - Oct 26 2011019	16				Oct 25 D1 - t1t376 het019	8				T1T2-441 KO C6 - Oct 26 2011019	10
	0.728103	0.488596	0.4709		0.443741	0.389653	0.422577		0.39025	0.317725	0.426585		T1T2-374 WT - C1 - Oct 26 2011020	20				Oct 25 D1 - t1t376 het020	13				T1T2-441 KO C6 - Oct 26 2011020	10
													T1T2-374 WT - C1 - Oct 26 2011021	18				Oct 25 D1 - t1t376 het021	14				T1T2-441 KO C6 - Oct 26 2011021	5
Per 100 um2	WT	WT	WT		HET	HET	HET		KO	KO	KO		T1T2-374 WT - C1 - Oct 26 2011022	13				Oct 25 D1 - t1t376 het022	14				T1T2-441 KO C6 - Oct 26 2011022	9
	29.3053	21.7344	20.8896	24.192	24.0768	17.9461	19.7486	24.192	16.4894	14.3594	17.5304	#REF!	T1T2-374 WT - C1 - Oct 26 2011023	13				Oct 25 D1 - t1t376 het023	17				T1T2-441 KO C6 - Oct 26 2011023	13
	1.39796	0.938105	0.904128		0.851983	0.748133	0.811348		0.749281	0.610033	0.819043		T1T2-374 WT - C1 - Oct 26 2011024	13				Oct 25 D1 - t1t376 het024	8				T1T2-441 KO C6 - Oct 26 2011024	7
													T1T2-374 WT - C1 - Oct 26 2011025	17				Oct 25 D1 - t1t376 het025	9				T1T2-441 KO C6 - Oct 26 2011025	9
													T1T2-374 WT - C1 - Oct 26 2011026	14				Oct 25 D1 - t1t376 het026	16				T1T2-441 KO C6 - Oct 26 2011026	10
p-value WT vs. KO (n=3)													T1T2-374 WT - C1 - Oct 26 2011027	9				Oct 25 D1 - t1t376 het027	17				T1T2-441 KO C6 - Oct 26 2011027	11
#REF!													T1T2-374 WT - C1 - Oct 26 2011028	20				Oct 25 D1 - t1t376 het028	10				T1T2-441 KO C6 - Oct 26 2011028	9
													T1T2-374 WT - C1 - Oct 26 2011029	17				Oct 25 D1 - t1t376 het029	14				T1T2-441 KO C6 - Oct 26 2011029	7
p-value HET vs. KO (n=3)													T1T2-374 WT - C1 - Oct 26 2011030	19				Oct 25 D1 - t1t376 het030	12				T1T2-441 KO C6 - Oct 26 2011030	6
#REF!													T1T2-374 WT - C1 - Oct 26 2011031	13				Oct 25 D1 - t1t376 het031	5				T1T2-441 KO C6 - Oct 26 2011031	7
													T1T2-374 WT - C1 - Oct 26 2011032	15				Oct 25 D1 - t1t376 het032	9				T1T2-441 KO C6 - Oct 26 2011032	8
p-value HET vs. KO (n=3)													T1T2-374 WT - C1 - Oct 26 2011033	17				Oct 25 D1 - t1t376 het033	10				T1T2-441 KO C6 - Oct 26 2011033	9
0.342881													T1T2-374 WT - C1 - Oct 26 2011034	12				Oct 25 D1 - t1t376 het034	11				T1T2-441 KO C6 - Oct 26 2011034	8
													T1T2-374 WT - C1 - Oct 26 2011035	24				Oct 25 D1 - t1t376 het035	13				T1T2-441 KO C6 - Oct 26 2011035	4
	WT	DHET	DKO										T1T2-374 WT - C1 - Oct 26 2011036	13				Oct 25 D1 - t1t376 het036	15				T1T2-441 KO C6 - Oct 26 2011036	7
Net Average:	12.274	10.7365	8.37173										T1T2-374 WT - C1 - Oct 26 2011037	17				Oct 25 D1 - t1t376 het037	15				T1T2-441 KO C6 - Oct 26 2011037	8
S.E.M:	0.344951	0.264905	0.225332										T1T2-374 WT - C1 - Oct 26 2011038	25				Oct 25 D1 - t1t376 het038	16				T1T2-441 KO C6 - Oct 26 2011038	6
			0.682072										T1T2-374 WT - C1 - Oct 26 2011039	12				Oct 25 D1 - t1t376 het039	13				T1T2-441 KO C6 - Oct 26 2011039	10
N (mice):	3	3	3		9								T1T2-374 WT - C1 - Oct 26 2011040	21				Oct 25 D1 - t1t376 het040	13				T1T2-441 KO C6 - Oct 26 2011040	16
N (pictures):	146	148	191		485													Oct 25 D1 - t1t376 het041	8				T1T2-441 KO C6 - Oct 26 2011041	15
N (synapses):	1792	1589	1599		4980								T1T373 WT - oct 18 2011002	12	Local average			Oct 25 D1 - t1t376 het042	10				T1T2-441 KO C6 - Oct 26 2011042	11
													T1T373 WT - oct 18 2011003	15	11.32			Oct 25 D1 - t1t376 het043	11				T1T2-441 KO C6 - Oct 26 2011043	8
													T1T373 WT - oct 18 2011004	10	0.488596			Oct 25 D1 - t1t376 het044	13				T1T2-441 KO C6 - Oct 26 2011044	12
													T1T373 WT - oct 18 2011005	10				Oct 25 D1 - t1t376 het045	12				T1T2-441 KO C6 - Oct 26 2011045	9
													T1T373 WT - oct 18 2011006	8				Oct 25 D1 - t1t376 het046	10				T1T2-441 KO C6 - Oct 26 2011046	3
													T1T373 WT - oct 18 2011007	8				Oct 25 D1 - t1t376 het047	16				T1T2-441 KO C6 - Oct 26 2011047	7
													T1T373 WT - oct 18 2011008	9				Oct 25 D1 - t1t376 het048	16				T1T2-441 KO C6 - Oct 26 2011048	9
													T1T373 WT - oct 18 2011009	11				Oct 25 D1 - t1t376 het049	15				T1T2-441 KO C6 - Oct 26 2011049	7
													T1T373 WT - oct 18 2011010	12				Oct 25 D1 - t1t376 het050	16				T1T2-441 KO C6 - Oct 26 2011050	11
													T1T373 WT - oct 18 2011011	12				Oct 25 D1 - t1t376 het051	20				T1T2-441 KO C6 - Oct 26 2011051	8
													T1T373 WT - oct 18 2011012	8									T1T2-441 KO C6 - Oct 26 2011052	5
													T1T373 WT - oct 18 2011013	8				T1T2-448 het D6 - Oct 26 2011002	5	Local average
													T1T373 WT - oct 18 2011014	7				T1T2-448 het D6 - Oct 26 2011003	11	9.34694			T1T2 495 - B1 - Dec1 2011001	11	Local average
													T1T373 WT - oct 18 2011015	12				T1T2-448 het D6 - Oct 26 2011004	10	0.389653			T1T2 495 - B1 - Dec1 2011002	11	7.47887
													T1T373 WT - oct 18 2011016	14				T1T2-448 het D6 - Oct 26 2011005	12				T1T2 495 - B1 - Dec1 2011003	9	0.317725
													T1T373 WT - oct 18 2011017	14				T1T2-448 het D6 - Oct 26 2011006	4				T1T2 495 - B1 - Dec1 2011004	11
													T1T373 WT - oct 18 2011018	18				T1T2-448 het D6 - Oct 26 2011007	9				T1T2 495 - B1 - Dec1 2011005	8
													T1T373 WT - oct 18 2011019	10				T1T2-448 het D6 - Oct 26 2011008	7				T1T2 495 - B1 - Dec1 2011006	7
													T1T373 WT - oct 18 2011020	10				T1T2-448 het D6 - Oct 26 2011009	10				T1T2 495 - B1 - Dec1 2011007	4
													T1T373 WT - oct 18 2011021	10				T1T2-448 het D6 - Oct 26 2011010	9				T1T2 495 - B1 - Dec1 2011008	8
													T1T373 WT - oct 18 2011022	6				T1T2-448 het D6 - Oct 26 2011011	12				T1T2 495 - B1 - Dec1 2011009	12
													T1T373 WT - oct 18 2011023	13				T1T2-448 het D6 - Oct 26 2011012	8				T1T2 495 - B1 - Dec1 2011010	9
													T1T373 WT - oct 18 2011024	11				T1T2-448 het D6 - Oct 26 2011013	11				T1T2 495 - B1 - Dec1 2011011	3
													T1T373 WT - oct 18 2011025	7				T1T2-448 het D6 - Oct 26 2011014	7				T1T2 495 - B1 - Dec1 2011012	6
													T1T373 WT - oct 18 2011026	9				T1T2-448 het D6 - Oct 26 2011015	10				T1T2 495 - B1 - Dec1 2011013	8
													T1T373 WT - oct 18 2011027	19				T1T2-448 het D6 - Oct 26 2011016	12				T1T2 495 - B1 - Dec1 2011014	11
													T1T373 WT - oct 18 2011028	13				T1T2-448 het D6 - Oct 26 2011017	12				T1T2 495 - B1 - Dec1 2011015	6
													T1T373 WT - oct 18 2011029	7				T1T2-448 het D6 - Oct 26 2011018	10				T1T2 495 - B1 - Dec1 2011016	6
													T1T373 WT - oct 18 2011030	15				T1T2-448 het D6 - Oct 26 2011019	13				T1T2 495 - B1 - Dec1 2011017	4
													T1T373 WT - oct 18 2011031	17				T1T2-448 het D6 - Oct 26 2011020	6				T1T2 495 - B1 - Dec1 2011018	3
													T1T373 WT - oct 18 2011032	11				T1T2-448 het D6 - Oct 26 2011021	11				T1T2 495 - B1 - Dec1 2011019	7
													T1T373 WT - oct 18 2011033	9				T1T2-448 het D6 - Oct 26 2011022	5				T1T2 495 - B1 - Dec1 2011020	7
													T1T373 WT - oct 18 2011034	12				T1T2-448 het D6 - Oct 26 2011023	11				T1T2 495 - B1 - Dec1 2011021	12
													T1T373 WT - oct 18 2011035	8				T1T2-448 het D6 - Oct 26 2011024	15				T1T2 495 - B1 - Dec1 2011022	9
													T1T373 WT - oct 18 2011036	9				T1T2-448 het D6 - Oct 26 2011025	7				T1T2 495 - B1 - Dec1 2011023	8
													T1T373 WT - oct 18 2011037	7				T1T2-448 het D6 - Oct 26 2011026	9				T1T2 495 - B1 - Dec1 2011024	7
													T1T373 WT - oct 18 2011038	7				T1T2-448 het D6 - Oct 26 2011027	13				T1T2 495 - B1 - Dec1 2011025	6
													T1T373 WT - oct 18 2011039	10				T1T2-448 het D6 - Oct 26 2011028	6				T1T2 495 - B1 - Dec1 2011026	6
													T1T373 WT - oct 18 2011040	21				T1T2-448 het D6 - Oct 26 2011029	9				T1T2 495 - B1 - Dec1 2011027	6
													T1T373 WT - oct 18 2011041	13				T1T2-448 het D6 - Oct 26 2011030	10				T1T2 495 - B1 - Dec1 2011028	6
													T1T373 WT - oct 18 2011042	9				T1T2-448 het D6 - Oct 26 2011031	9				T1T2 495 - B1 - Dec1 2011029	8
													T1T373 WT - oct 18 2011043	14				T1T2-448 het D6 - Oct 26 2011032	5				T1T2 495 - B1 - Dec1 2011030	4
													T1T373 WT - oct 18 2011044	10				T1T2-448 het D6 - Oct 26 2011033	8				T1T2 495 - B1 - Dec1 2011031	8
													T1T373 WT - oct 18 2011045	16				T1T2-448 het D6 - Oct 26 2011034	11				T1T2 495 - B1 - Dec1 2011032	11
													T1T373 WT - oct 18 2011046	7				T1T2-448 het D6 - Oct 26 2011035	7				T1T2 495 - B1 - Dec1 2011033	6
													T1T373 WT - oct 18 2011047	16				T1T2-448 het D6 - Oct 26 2011036	10				T1T2 495 - B1 - Dec1 2011034	9
													T1T373 WT - oct 18 2011048	14				T1T2-448 het D6 - Oct 26 2011037	7				T1T2 495 - B1 - Dec1 2011035	4
													T1T373 WT - oct 18 2011049	14				T1T2-448 het D6 - Oct 26 2011038	11				T1T2 495 - B1 - Dec1 2011036	8
													T1T373 WT - oct 18 2011050	13				T1T2-448 het D6 - Oct 26 2011039	9				T1T2 495 - B1 - Dec1 2011037	6
													T1T373 WT - oct 18 2011051	11				T1T2-448 het D6 - Oct 26 2011040	10				T1T2 495 - B1 - Dec1 2011038	6
																		T1T2-448 het D6 - Oct 26 2011041	12				T1T2 495 - B1 - Dec1 2011039	5
													T1T2-457 WT E8 Nov 9 2011001	16	Local average			T1T2-448 het D6 - Oct 26 2011042	12				T1T2 495 - B1 - Dec1 2011040	3
													T1T2-457 WT E8 Nov 9 2011002	10	10.88			T1T2-448 het D6 - Oct 26 2011043	5				T1T2 495 - B1 - Dec1 2011041	5
													T1T2-457 WT E8 Nov 9 2011003	10	0.4709			T1T2-448 het D6 - Oct 26 2011044	11				T1T2 495 - B1 - Dec1 2011042	8
													T1T2-457 WT E8 Nov 9 2011004	8				T1T2-448 het D6 - Oct 26 2011045	4				T1T2 495 - B1 - Dec1 2011043	11
													T1T2-457 WT E8 Nov 9 2011005	15				T1T2-448 het D6 - Oct 26 2011046	6				T1T2 495 - B1 - Dec1 2011044	8
													T1T2-457 WT E8 Nov 9 2011006	8				T1T2-448 het D6 - Oct 26 2011047	14				T1T2 495 - B1 - Dec1 2011045	9
													T1T2-457 WT E8 Nov 9 2011007	13				T1T2-448 het D6 - Oct 26 2011048	12				T1T2 495 - B1 - Dec1 2011046	8
													T1T2-457 WT E8 Nov 9 2011008	8				T1T2-448 het D6 - Oct 26 2011049	12				T1T2 495 - B1 - Dec1 2011047	9
													T1T2-457 WT E8 Nov 9 2011009	8				T1T2-448 het D6 - Oct 26 2011050					T1T2 495 - B1 - Dec1 2011048	7
													T1T2-457 WT E8 Nov 9 2011010	7				T1T2-448 het D6 - Oct 26 2011051	9				T1T2 495 - B1 - Dec1 2011049	6
													T1T2-457 WT E8 Nov 9 2011011	14									T1T2 495 - B1 - Dec1 2011050	5
													T1T2-457 WT E8 Nov 9 2011012	12				T1T2 - 440 HET B6 Nov 3 2011004	10	Local average			T1T2 495 - B1 - Dec1 2011051	8
													T1T2-457 WT E8 Nov 9 2011013	14				T1T2 - 440 HET B6 Nov 3 2011005	9	10.2857			T1T2 495 - B1 - Dec1 2011052	14
													T1T2-457 WT E8 Nov 9 2011014	12				T1T2 - 440 HET B6 Nov 3 2011006	13	0.422577			T1T2 495 - B1 - Dec1 2011053	11
													T1T2-457 WT E8 Nov 9 2011015	8				T1T2 - 440 HET B6 Nov 3 2011007	12				T1T2 495 - B1 - Dec1 2011054	3
													T1T2-457 WT E8 Nov 9 2011016	6				T1T2 - 440 HET B6 Nov 3 2011008	10				T1T2 495 - B1 - Dec1 2011055	14
													T1T2-457 WT E8 Nov 9 2011017	14				T1T2 - 440 HET B6 Nov 3 2011009	4				T1T2 495 - B1 - Dec1 2011056	10
													T1T2-457 WT E8 Nov 9 2011018	12				T1T2 - 440 HET B6 Nov 3 2011010	7				T1T2 495 - B1 - Dec1 2011057	7
													T1T2-457 WT E8 Nov 9 2011019	7				T1T2 - 440 HET B6 Nov 3 2011011	12				T1T2 495 - B1 - Dec1 2011058	11
													T1T2-457 WT E8 Nov 9 2011020	7				T1T2 - 440 HET B6 Nov 3 2011012	7				T1T2 495 - B1 - Dec1 2011059	7
													T1T2-457 WT E8 Nov 9 2011021	11				T1T2 - 440 HET B6 Nov 3 2011013	9				T1T2 495 - B1 - Dec1 2011060	2
													T1T2-457 WT E8 Nov 9 2011022	8				T1T2 - 440 HET B6 Nov 3 2011014	14				T1T2 495 - B1 - Dec1 2011061	9
													T1T2-457 WT E8 Nov 9 2011023	5				T1T2 - 440 HET B6 Nov 3 2011015	12				T1T2 495 - B1 - Dec1 2011062	9
													T1T2-457 WT E8 Nov 9 2011024	8				T1T2 - 440 HET B6 Nov 3 2011016	12				T1T2 495 - B1 - Dec1 2011063	4
													T1T2-457 WT E8 Nov 9 2011025	5				T1T2 - 440 HET B6 Nov 3 2011017	11				T1T2 495 - B1 - Dec1 2011064	6
													T1T2-457 WT E8 Nov 9 2011026	9				T1T2 - 440 HET B6 Nov 3 2011018	7				T1T2 495 - B1 - Dec1 2011065	9
													T1T2-457 WT E8 Nov 9 2011027	9				T1T2 - 440 HET B6 Nov 3 2011019	10				T1T2 495 - B1 - Dec1 2011066	5
													T1T2-457 WT E8 Nov 9 2011028	12				T1T2 - 440 HET B6 Nov 3 2011020	6				T1T2 495 - B1 - Dec1 2011067	8
													T1T2-457 WT E8 Nov 9 2011029	18				T1T2 - 440 HET B6 Nov 3 2011021	7				T1T2 495 - B1 - Dec1 2011068	9
													T1T2-457 WT E8 Nov 9 2011030	9				T1T2 - 440 HET B6 Nov 3 2011022	8				T1T2 495 - B1 - Dec1 2011069	6
													T1T2-457 WT E8 Nov 9 2011031	14				T1T2 - 440 HET B6 Nov 3 2011023	7				T1T2 495 - B1 - Dec1 2011070	10
													T1T2-457 WT E8 Nov 9 2011032	14				T1T2 - 440 HET B6 Nov 3 2011024	10				T1T2 495 - B1 - Dec1 2011071	4
													T1T2-457 WT E8 Nov 9 2011033	11				T1T2 - 440 HET B6 Nov 3 2011025	13
													T1T2-457 WT E8 Nov 9 2011034	9				T1T2 - 440 HET B6 Nov 3 2011026	16				T1T2 497 - C1 - Dec1 2011001	8	Local average
													T1T2-457 WT E8 Nov 9 2011035	14				T1T2 - 440 HET B6 Nov 3 2011027	10				T1T2 497 - C1 - Dec1 2011002	11	9.13043
													T1T2-457 WT E8 Nov 9 2011036	7				T1T2 - 440 HET B6 Nov 3 2011028	12				T1T2 497 - C1 - Dec1 2011003	10	0.426585
													T1T2-457 WT E8 Nov 9 2011037	8				T1T2 - 440 HET B6 Nov 3 2011029	9				T1T2 497 - C1 - Dec1 2011004	10
													T1T2-457 WT E8 Nov 9 2011038	12				T1T2 - 440 HET B6 Nov 3 2011030	13				T1T2 497 - C1 - Dec1 2011005	6
													T1T2-457 WT E8 Nov 9 2011039	16				T1T2 - 440 HET B6 Nov 3 2011031	11				T1T2 497 - C1 - Dec1 2011006	13
													T1T2-457 WT E8 Nov 9 2011040	13				T1T2 - 440 HET B6 Nov 3 2011032	11				T1T2 497 - C1 - Dec1 2011007	12
													T1T2-457 WT E8 Nov 9 2011041	13				T1T2 - 440 HET B6 Nov 3 2011033	16				T1T2 497 - C1 - Dec1 2011008	10
													T1T2-457 WT E8 Nov 9 2011042	16				T1T2 - 440 HET B6 Nov 3 2011034	11				T1T2 497 - C1 - Dec1 2011009	12
													T1T2-457 WT E8 Nov 9 2011043	9				T1T2 - 440 HET B6 Nov 3 2011035	9				T1T2 497 - C1 - Dec1 2011010	12
													T1T2-457 WT E8 Nov 9 2011044	11				T1T2 - 440 HET B6 Nov 3 2011036	5				T1T2 497 - C1 - Dec1 2011011	14
													T1T2-457 WT E8 Nov 9 2011045	14				T1T2 - 440 HET B6 Nov 3 2011037	8				T1T2 497 - C1 - Dec1 2011012	11
													T1T2-457 WT E8 Nov 9 2011046	14				T1T2 - 440 HET B6 Nov 3 2011038	13				T1T2 497 - C1 - Dec1 2011013	16
													T1T2-457 WT E8 Nov 9 2011047	16				T1T2 - 440 HET B6 Nov 3 2011039	13				T1T2 497 - C1 - Dec1 2011014	12
													T1T2-457 WT E8 Nov 9 2011048	14				T1T2 - 440 HET B6 Nov 3 2011040	14				T1T2 497 - C1 - Dec1 2011015	10
													T1T2-457 WT E8 Nov 9 2011049	10				T1T2 - 440 HET B6 Nov 3 2011041	9				T1T2 497 - C1 - Dec1 2011016	9
													T1T2-457 WT E8 Nov 9 2011050	6				T1T2 - 440 HET B6 Nov 3 2011042	9				T1T2 497 - C1 - Dec1 2011017	8
													T1T2-457 WT E8 Nov 9 2011051	10				T1T2 - 440 HET B6 Nov 3 2011043	14				T1T2 497 - C1 - Dec1 2011018	4
													T1T2-457 WT E8 Nov 9 2011052	13				T1T2 - 440 HET B6 Nov 3 2011044	11				T1T2 497 - C1 - Dec1 2011019	7
													T1T2-457 WT E8 Nov 9 2011053	13				T1T2 - 440 HET B6 Nov 3 2011045	5				T1T2 497 - C1 - Dec1 2011020	12
													T1T2-457 WT E8 Nov 9 2011054	13				T1T2 - 440 HET B6 Nov 3 2011046	15				T1T2 497 - C1 - Dec1 2011021	10
													T1T2-457 WT E8 Nov 9 2011055	14				T1T2 - 440 HET B6 Nov 3 2011047	7				T1T2 497 - C1 - Dec1 2011022	11
													T1T2-457 WT E8 Nov 9 2011056	7				T1T2 - 440 HET B6 Nov 3 2011048	13				T1T2 497 - C1 - Dec1 2011023	8
													T1T2-457 WT E8 Nov 9 2011057	23				T1T2 - 440 HET B6 Nov 3 2011049	14				T1T2 497 - C1 - Dec1 2011024	5
													T1T2-457 WT E8 Nov 9 2011058	9				T1T2 - 440 HET B6 Nov 3 2011050	8				T1T2 497 - C1 - Dec1 2011025	5
																		T1T2 - 440 HET B6 Nov 3 2011051	11				T1T2 497 - C1 - Dec1 2011026	8
																		T1T2 - 440 HET B6 Nov 3 2011052	7				T1T2 497 - C1 - Dec1 2011027	9
																							T1T2 497 - C1 - Dec1 2011028	7
																							T1T2 497 - C1 - Dec1 2011029	8
																							T1T2 497 - C1 - Dec1 2011030	7
																							T1T2 497 - C1 - Dec1 2011031	16
																							T1T2 497 - C1 - Dec1 2011032	11
																							T1T2 497 - C1 - Dec1 2011033	6
																							T1T2 497 - C1 - Dec1 2011034	9
																							T1T2 497 - C1 - Dec1 2011035	6
																							T1T2 497 - C1 - Dec1 2011036	3
																							T1T2 497 - C1 - Dec1 2011037	10
																							T1T2 497 - C1 - Dec1 2011038	2
																							T1T2 497 - C1 - Dec1 2011039	3
																							T1T2 497 - C1 - Dec1 2011040	4
																							T1T2 497 - C1 - Dec1 2011041	11
																							T1T2 497 - C1 - Dec1 2011042	7
																							T1T2 497 - C1 - Dec1 2011043	8
																							T1T2 497 - C1 - Dec1 2011044	14
																							T1T2 497 - C1 - Dec1 2011045	11
																							T1T2 497 - C1 - Dec1 2011046	11
																							T1T2 497 - C1 - Dec1 2011047	10
																							T1T2 497 - C1 - Dec1 2011048	8
																							T1T2 497 - C1 - Dec1 2011049	7
																							T1T2 497 - C1 - Dec1 2011050	9
																							T1T2 497 - C1 - Dec1 2011051	17
																							T1T2 497 - C1 - Dec1 2011052	10
																							T1T2 497 - C1 - Dec1 2011053	6
																							T1T2 497 - C1 - Dec1 2011054	11
																							T1T2 497 - C1 - Dec1 2011055	4
																							T1T2 497 - C1 - Dec1 2011056	2
																							T1T2 497 - C1 - Dec1 2011057	9
																							T1T2 497 - C1 - Dec1 2011058	9
																							T1T2 497 - C1 - Dec1 2011059	9
																							T1T2 497 - C1 - Dec1 2011060	17
																							T1T2 497 - C1 - Dec1 2011061	19
																							T1T2 497 - C1 - Dec1 2011062	7
																							T1T2 497 - C1 - Dec1 2011063	12
																							T1T2 497 - C1 - Dec1 2011064	6
																							T1T2 497 - C1 - Dec1 2011065	7
																							T1T2 497 - C1 - Dec1 2011066	7
																							T1T2 497 - C1 - Dec1 2011067	7
																							T1T2 497 - C1 - Dec1 2011068	11
																							T1T2 497 - C1 - Dec1 2011069	9

## Sheet: PROGRESS
	Mouse	Genotype	Perfused	Embedded	All Cut	Stained	Hippocampus	Synapse Quality	Imaged	Analysis
Set1	T1T2-370	ALP-/+ GAM -/+	2011-08-16	2011-08-19	2004-10-01	1 grid	Correct region	Fair	Checked quality + hippocampus	Pending
	T1T2-373	ALP+/+ GAM +/+	2011-08-16	2011-08-19	2004-10-01	1 grid	Correct region	Poor	Full set Taken (30x, 60x)	In Progress
	T1T2-374	ALP+/+ GAM +/+	2011-08-16	2011-08-19	2004-10-01	1 grid	Correct region	Fair	Full set Taken (30x, 60x)	In Progress
	T1T2-376	ALP-/+ GAM -/+	2011-08-16	2011-08-19	2004-10-01	1 grid	Correct region	Excellent	Full set Taken (30x, 60x)	In Progress
	T1T2-377	ALP-/+ GAM -/+	2011-08-16	2011-08-19	2004-10-01	1 grid	Correct region	Fair	Checked quality + hippocampus	Pending
Set 2	T1T2-439	ALP -/+ GAM -/+	2011-09-15	~Sept 19	2006-10-01	1 grid	Correct region	Fair	Checked quality + hippocampus	Pending
	T1T2-440	ALP -/+ GAM -/+	2011-09-15	~Sept 19	2006-10-01	1 grid	Correct region	Good	Full set Taken (30x, 60x)	Pending
	T1T2-441	ALP -/- GAM -/-	2011-09-15	~Sept 19	2006-10-01	1 grid	Correct region	Fair	Full set Taken (30x, 60x)	In Progress
	T1T2-448	ALP -/+ GAM -/+	2011-09-15	~Sept 19	2006-10-01	1 grid	Correct region	Good	Full set Taken (30x, 60x)	Pending
	T1T2-457	ALP +/+ GAM +/+	2011-09-15	~Sept 19	2006-10-01	1 grid	Correct region	Good	Full set Taken (30x, 60x)	Pending
Set 3	T1T2-482	ALP -/- GAM -/-	2011-10-04	~Oct 15	Pending
	T1T2-495	ALP -/- GAM -/-	2011-10-11	~Oct 15	Pending
	T1T2-497	ALP -/- GAM -/-	2011-10-11	~Oct 15	Pending

## Sheet: MORPHOLOGY.
	N VALUES:								N VALUES:
Synapses	694	93	605						184	32	193
Mice	3	3	3						3	3	3
			INCREASE:				INCREASE:				DECREASE:					3.98913																				3.07254
	SPINE WIDTH:		0.0320671		AZ LENGTH:		0.148859		DENSITY:		0.229772
	WT	DHET	DKO		WT	DHET	DKO		WT	DHET	DKO				MICROGRAPH	Number	Synapse	Spine Width	AZ length		TOTAL:			MICROGRAPH	Number	Synapse	Spine Width	AZ length		TOTAL:					MICROGRAPH	Number	Synapse	Spine Width	AZ length		TOTAL:
	Width	Width	Width		Az	Az	Az		Density	Density	Density				T1T2-457 WT E8 Nov 9 2011059	2	1	156.272	119.102		119.102			Oct 25 D1 - t1t376 het053	2	1	289.171	94.704		94.704					T1T2 495 - B1 - Dec1 2011072	3	1	113.437	86.499		86.499		104.893	94.0046	102.632
	172.623	173.982	178.158		87.2593	91.5989	102.52		3.98913	3.09375	3.07254						2	212.96	61.253		61.253					2	XXXXXX	96.54		96.54							2	190.56	132.516		132.516		146
	4.62811	7.94673	6.54905		1.90007	3.08621	1.47511		0.115086	0.255423	0.115086																										3	110.218	66.208		66.208
															T1T2-457 WT E8 Nov 9 2011060	2	1	175.354	96.078		96.078			Oct 25 D1 - t1t376 het054	4	1	212.85	120.179		120.179
	TTEST, WT vs. KO p -value				TTEST, WT vs. KO p -value				TTEST, WT vs. KO p -value								2	136.821	76.707		76.707					2	111.158	71.197		71.197					T1T2 495 - B1 - Dec1 2011073	3	1	105.561	62.416		62.416
	0.186211				5.91115e-16	#DIV/0!			2.28011e-09																	3	196.54	88.501		88.501							2	351.216	179.89		179.89
															T1T2-457 WT E8 Nov 9 2011061	1	1	177.133	75.153		75.153					4	199.402	101.493		101.493							3	253.18	87.817		87.817
															T1T2-457 WT E8 Nov 9 2011062	2	1	168.808	89.462		89.462			Oct 25 D1 - t1t376 het055	3	1	136.004	65.048		65.048					T1T2 495 - B1 - Dec1 2011074	1	1	211.896	91.234	44.688	135.922
																	2	XXXXXX	51.959		51.959					2		72.881	48.177	121.058
																										3	80.056	55.73		55.73					T1T2 495 - B1 - Dec1 2011075	2	1	74.673	68.73		68.73
															T1T2-457 WT E8 Nov 9 2011063	4	1	124.615	76.927		76.927																2	157.851	92.85		92.85
																	2	188.322	111.902		111.902			Oct 25 D1 - t1t376 het056	1	1	157.61	61.27		61.27
																	3	103.247	65.306		65.306														T1T2 495 - B1 - Dec1 2011076	2	1	93.536	87.794		87.794
																	4	143.126	91.407		91.407			Oct 25 D1 - t1t376 het057	4	1	168.68	77.162		77.162							2	121.495	70.859		70.859
																										2	147.557	87.235		87.235
															T1T2-457 WT E8 Nov 9 2011064	5	1	154.029	105.985		105.985					3	344.308	218.013		218.013					T1T2 495 - B1 - Dec1 2011077	2	1	277.218	88.091		88.091
																	2	143.402	77.938		77.938					4	257.597	87.363		87.363							2	305.712	93.091	96.356	189.447
																	3	XXXXXX	98.849		98.849
																	4	111.79	73.402		73.402			Oct 25 D1 - t1t376 het058	4	1	222.928	119.907		119.907					T1T2 495 - B1 - Dec1 2011078	3	1	134.792	102.176		102.176
																	5	XXXXXX	97.592		97.592					2	103.019	42.297		42.297							2	268.881	152.533		152.533
																										3	76.059	45.394		45.394							3	126.052	97.062		97.062
															T1T2-457 WT E8 Nov 9 2011065	4	1	199.462	138.895		138.895					4	224.083	111.83		111.83
																	2	118.533	51.348		51.348														T1T2 495 - B1 - Dec1 2011079	3	1	108.724	75.993		75.993
																	3	148.03	101.578		101.578			Oct 25 D1 - t1t376 het059	5	1	152.003	83.024		83.024							2	204.022	141.376		141.376
																	4	118.068	72.856		72.856					2	176.139	63.478		63.478							3	215.539	116.031		116.031
																										3	64.938	46.098		46.098
															T1T2-457 WT E8 Nov 9 2011066	2	1	272.547	169.054		169.054					4	242.866	59.925		59.925					T1T2 495 - B1 - Dec1 2011080	4	1	147.363	163.65		163.65
																	2	127.534	72.643		72.643					5	165.747	50.448		50.448							2	123.329	149.203		149.203
																																					3	201.109	141.97		141.97
															T1T2-457 WT E8 Nov 9 2011067	5	1	212.078	73.235		73.235			Oct 25 D1 - t1t376 het060	3	1	185.003	76.113		76.113							4	132.076	106.886		106.886
	SCALE: 500 nm = 143 pixels																2	201.636	84.589		84.589					2	211.783	87.082		87.082
	3.496 nm/ pixel																3	171.237	92.625		92.625					3	414.845	98.412		98.412					T1T2 495 - B1 - Dec1 2011081	2	1	102.176	54.445		54.445
																	4	93.15	74.367		74.367																2	119.57	64.416		64.416
																	5	129.869	77.94		77.94			Oct 25 D1 - t1t376 het061	6	1	322.591	102.549		102.549
																										2	81.345	28.32		28.32					T1T2 495 - B1 - Dec1 2011082	3	1	176.819	91.615		91.615		102.584
	SPINE WIDTH:		0.0320671		AZ LENGTH:		0.148859								T1T2-457 WT E8 Nov 9 2011068	4	1	237.697	100.61		100.61					3	265.398	120.84		120.84							2	191.063	135.051		135.051
	WT	DHET	DKO		WT	DHET	DKO										2	149.833	85.598		85.598					4	173.358	73.246		73.246							3	213.701	120.574		120.574
	Width	Width	Width		Az	Az	Az										3	145.602	92.668		92.668					5	257.783	95.332		95.332
	603.49	608.24	622.842		305.058	320.23	358.411										4	XXXXXX	95.465		95.465					6	106.85	78.334		78.334					T1T2 495 - B1 - Dec1 2011083	5	1	104.317	77.789		77.789
	16.1799	27.7818	22.8955		6.64265	10.7894	5.15698																														2	272.809	190.404		190.404
															T1T2-457 WT E8 Nov 9 2011069	3	1	123.065	128.514		128.514			Oct 25 D1 - t1t376 het062	6	1	121.696	70.645		70.645							3	126.147	58.188		58.188
																	2		118.436		118.436					2	99.725	67.973		67.973							4	148.489	68.182		68.182
																	3	243.016	156.357		156.357					3	136.312	79.127		79.127							5	146.014	104.588		104.588
																										4	131.643	68.264		68.264
															T1T2-457 WT E8 Nov 9 2011070	4	1	64.885	55.57		55.57					5	258.588	99.615		99.615					T1T2 495 - B1 - Dec1 2011084	4	1	168.122	122.154		122.154
																	2	106.32	56.88		56.88					6	204.002	82.623		82.623							2	150.685	124.902		124.902
																	3	110.168	62.024		62.024																3	182.858	71.509		71.509
																	4	116.43	62.431		62.431			Oct 25 D1 - t1t376 het063	5	1	126.194	87.411		87.411							4	108.665	62.256		62.256
																										2	157.433	106.967		106.967
															T1T2-457 WT E8 Nov 9 2011071	3	1	142.014	63.967		63.967					3	157.762	74.982		74.982					T1T2 495 - B1 - Dec1 2011085	3	1		106.243		106.243
																	2	145.055	94.952		94.952					4	146.455	69.04		69.04							2		141.977		141.977
																	3	126.036	77.555		77.555					5	236.373	123.731		123.731							3		87.155		87.155
															T1T2-457 WT E8 Nov 9 2011072	3	1	143.892	79.526		79.526			Oct 25 D1 - t1t376 het064	6	1	106.005	54.025		54.025					T1T2 495 - B1 - Dec1 2011086	2	1		94.16		94.16
																	2	136.059	65.498		65.498					2	135.665	90.62		90.62							2		69.517		69.517
																	3	99.086	112.313		112.313					3	97.652	56.939		56.939
Active Zone (pixels)																										4	81.302	67.079		67.079					T1T2 495 - B1 - Dec1 2011087	5	1		188.763		188.763
	WT	WT	WT	HET	HET	HET	KO	KO	KO						T1T2-457 WT E8 Nov 9 2011073	3	1	150.586	116.579		116.579					5	133.417	101.288		101.288							2		104.612		104.612
Per micrograph	94.3638	85.4983	82.1048	83.822	95.378	105.887	104.893	105.089	98.1693								2		130.146		130.146					6	134.38	78.829		78.829							3		143.74		143.74
																	3	319.038	112.7		112.7																4		74.26		74.26
	87.3223	95.029	102.717																																		5		78.346		78.346
	3.65449	6.37198	2.27475												T1T2-457 WT E8 Nov 9 2011074	3	1	233.335	101.172		101.172
																	2	138.134	117.006		117.006														T1T2 495 - B1 - Dec1 2011088	4	1		84.867		84.867
	0.367055			0.352873													3	226.515	64.281		64.281																2		50.237		50.237
																																					3		147.794		147.794
															T1T2-457 WT E8 Nov 9 2011075	3	1	177.116	112.942		112.942																4		74.069		74.069
																	2	115.352	76.733		76.733
																	3	233.848	79.756		79.756														T1T2 495 - B1 - Dec1 2011089	4	1		81.091		81.091
																																					2		100.358		100.358
																																					3		69.645		69.645
															T1T2-457 WT E8 Nov 9 2011076	2	1	174.657	138.36		138.36																4		97.905		97.905
																	2	193.807	111.177		111.177
																																			T1T2 495 - B1 - Dec1 2011090	4	1		96.416		96.416
															T1T2-457 WT E8 Nov 9 2011077	4	1	117.427	88.837		88.837																2		70.009		70.009
																	2	131.594	72.567		72.567																3		115.104		115.104
																	3	113.78	81.565		81.565																4		78.642		78.642
																	4	94.032	49.77		49.77
																	5	135.857	78.766		78.766														T1T2 495 - B1 - Dec1 2011091	6	1		93.857		93.857
													n=4																								2		96.733		96.733
	WT	WT	WT		HET	HET	HET		KO	KO	KO				T1T2-457 WT E8 Nov 9 2011078	5	1	310.595	156.238		156.238																3		92.358		92.358
Per micrograph	94.3638	85.4983	82.1048	92	83.822	95.378	105.887	92	104.893	105.089	98.1693	109					2	118.207	87.587		87.587																4		196.958		196.958
																	3	220.411	54.781	65.437	120.218																5		101.578		101.578
	88.4917	94.2717	104.288														4	218	115.596		115.596			T1T2 - 440 HET B6 Nov 3 2011053	4	1	177.003	99.759		99.759							6		98.731		98.731
	2.83641	4.56886	2.24815														5	162.388	51.264		51.264					2	XXXXX	62.739		62.739
																										3	XXXXX	76.933		76.933
	0.331442			0.114528											T1T2-457 WT E8 Nov 9 2011079	4	1	162.496	105.956		105.956					4	132.966	90.321		90.321					T1T2 495 - B1 - Dec1 2011092	3	1		112.499		112.499
				1.17851													2	196.474	89.852		89.852																2		143.252		143.252
																	3	124.619	108.676		108.676			T1T2 - 440 HET B6 Nov 3 2011054	2	1	233.908	65.342		65.342							3		99.494		99.494
																	4	78.791	55.87		55.87					2	236.172	109.551		109.551
																																			T1T2 495 - B1 - Dec1 2011093	5	1		79.979		79.979
															T1T2-457 WT E8 Nov 9 2011080	4	1	136.653	94.814		94.814			T1T2 - 440 HET B6 Nov 3 2011055	2	1	213.026	154.81		154.81							2		147.917		147.917
																	2	126.099	52.345		52.345					2	215.281	48.042		48.042							3		97.996		97.996
																	3	259.409	92.056		92.056																4		119.697		119.697
																	4	303.817	173.808		173.808			T1T2 - 440 HET B6 Nov 3 2011056	5	1	219.893	96.716		96.716							5		93.056		93.056
																										2	242.002	119.643		119.643
															T1T2-457 WT E8 Nov 9 2011081	4	1	278.368	132.115		132.115					3	189.855	109.739		109.739					T1T2 495 - B1 - Dec1 2011094	2	1		209.672		209.672
																	2	173.934	112.655		112.655					4	157.892	82.644		82.644							2		61.346		61.346
																	3	312.706	50.22		50.22					5	103.233	94.177		94.177
																	4	168.122	82.077		82.077														T1T2 495 - B1 - Dec1 2011095	4	1		73.059		73.059
																								T1T2 - 440 HET B6 Nov 3 2011057	2	1	238.757	104.662		104.662							2		58.5		58.5
															T1T2-457 WT E8 Nov 9 2011082	4	1	165.194	125.332		125.332					2	131.7	98.786		98.786							3		76.453		76.453
																	2	307.566	79.752		79.752																4		56.874		56.874
																	3	186.947	57.983		57.983			T1T2 - 440 HET B6 Nov 3 2011058	3	1	46.4	44.875		44.875
																	4	119.474	68.877		68.877					2	113.071	112.026		112.026					T1T2 495 - B1 - Dec1 2011096	2	1		96.676		96.676
Spine Width (pixels)																										3	137.594	107.306		107.306							2		102.569		102.569
	WT	WT	WT	HET	HET	HET	KO	KO	KO						T1T2-457 WT E8 Nov 9 2011083	3	1	108.757	72.007		72.007
Per micrograph	177.554	173.479	168.694	174.729	171.477	175.481	166.031	191.946	170.634								2	145.121	63.789		63.789			T1T2 - 440 HET B6 Nov 3 2011059	3	1	265.096	82.91		82.91					T1T2 495 - B1 - Dec1 2011097	4	1		53.125		53.125
																	3	268.745	108.317		108.317					2	133.735	81.985		81.985							2
	173.242	173.896	176.204							SCALE: 500 nm = 143 pixels																3	144.25	114.485		114.485							3		135.959		135.959
	2.56046	1.22853	7.98269							3.496 nm/ pixel					T1T2-457 WT E8 Nov 9 2011084	2	1	84.528	50.329		50.329																4		141.258		141.258
																	2	197.626	140.34		140.34			T1T2 - 440 HET B6 Nov 3 2011060	2	1	124.101	75.676		75.676
	0.833333			0.800852																						2	87.801	73.391		73.391					T1T2 495 - B1 - Dec1 2011098	3	1		84.896		84.896
															T1T2-457 WT E8 Nov 9 2011085	3	1	230.868	125.825		125.825																2		86.672		86.672
																	2	91.082	71.635		71.635			T1T2 - 440 HET B6 Nov 3 2011061	2	1	164.344	122.037		122.037							3		73.033		73.033
																	3	92.779	24.515		24.515					2	277.872	119.941		119.941
																																			T1T2 495 - B1 - Dec1 2011099	2	1		164.94		164.94
															T1T2-457 WT E8 Nov 9 2011086	7	1	148.385	44.045		44.045			T1T2 - 440 HET B6 Nov 3 2011062	4	1	114.477	82.962		82.962							2		116.309		116.309
																	2	181.4	121.274		121.274					2	XXXXX	141.737		141.737
																	3	244.663	110.691		110.691					3	101.134	109.3		109.3					T1T2 495 - B1 - Dec1 2011116	3	1		77.639		77.639
																	4	216.622	106.022		106.022					4	256.846	83.466		83.466							2		164.987		164.987
																	5	138.196	110.827		110.827																3		74.244		74.244
																	6	220.493	139.281		139.281
																	7	149	77.162		77.162														T1T2 495 - B1 - Dec1 2011117	1	1		142.452		142.452
															T1T2-457 WT E8 Nov 9 2011087	5	1	99.202	60.776		60.776														T1T2 495 - B1 - Dec1 2011118	1	1		89.419		89.419
																	2	193.507	76.451		76.451
																	3	103.238	53.097		53.097														T1T2 495 - B1 - Dec1 2011119	2	1		89.761		89.761
																	4	206.495	121.733		121.733																2		68.923		68.923
Spine Width (nm)																	5	190.539	77.086		77.086
	WT	WT	WT	HET	HET	HET	KO	KO	KO																										T1T2 495 - B1 - Dec1 2011120	2	1		105.872		105.872
Per micrograph	620.728	606.481	589.753	610.853	599.485	613.48	580.444	671.045	596.536						T1T2-457 WT E8 Nov 9 2011088	2	1	120.88	70.506		70.506																2		174.495		174.495
																	2	229.687	95.767		95.767
	605.654	607.939	616.008																																T1T2 495 - B1 - Dec1 2011121	5	1		68		68
	8.95135	4.29493	27.9075												T1T2-457 WT E8 Nov 9 2011089	6	1	420.073	104.032		104.032																2		101.522		101.522
																	2	301.682	130.29		130.29																3		82.043		82.043
	0.833333			0.800852													3	213.171	54.571		54.571																4		117.141		117.141
																	4	102.108	81.729		81.729																5		80.613		80.613
																	5	166.433	81.447		81.447
																	6	xxxx	xxxx																T1T2 495 - B1 - Dec1 2011122	3	1		169.901		169.901
																								T1T2-448 het D6 - Oct 26 2011053	1	1	123.491	88.586		88.586							2		120.384		120.384
															T1T2-457 WT E8 Nov 9 2011090	3	1	193.598	129.913		129.913																3		83.857		83.857
																	2	120.075	94.305		94.305			T1T2-448 het D6 - Oct 26 2011054	2	1	132.966	70.363		70.363
																	3	115.278	98.8		98.8					2	91.093	64.806		64.806					T1T2 495 - B1 - Dec1 2011123	4	1		183.246		183.246
																																					2		71.213		71.213
															T1T2-457 WT E8 Nov 9 2011091	3	1	133.81	55.579		55.579			T1T2-448 het D6 - Oct 26 2011055	2	1	115.004	96.042		96.042							3		82.714		82.714
																	2	81.302	79.708		79.708					2	100.125	96.15		96.15							4
																	3	211.4	124.772		124.772
																								T1T2-448 het D6 - Oct 26 2011056	2	1	131.244	92.499		92.499					T1T2 495 - B1 - Dec1 2011124	3	1		132.33		132.33
															T1T2-457 WT E8 Nov 9 2011092	4	1	194.879	86.51		86.51					2	69.971	74.882		74.882							2		125.776		125.776
																	2	109.895	68.886		68.886																3		220.008		220.008
																	3	54.589	33.065		33.065			T1T2-448 het D6 - Oct 26 2011057	3	1	250.06	127.911		127.911
																	4	136.624	70.153		70.153					2	276.471	92.301		92.301					T1T2 495 - B1 - Dec1 2011125	2	1		118.69		118.69
																										3	79.649	84.541		84.541							2		71.639		71.639
															T1T2-457 WT E8 Nov 9 2011093	3	1	118.794	91.574		91.574
																	2	244.387	98.533		98.533			T1T2-448 het D6 - Oct 26 2011058	2	1	190.055	157.294		157.294					T1T2 495 - B1 - Dec1 2011126	4	1		143.636		143.636
																	3	306.589	98.857		98.857					2	250.45	131.296		131.296							2		70.204		70.204
																																					3		69.127		69.127
															T1T2-457 WT E8 Nov 9 2011094	3	1	142.274	99.102		99.102			T1T2-448 het D6 - Oct 26 2011059	2	1	XXXXX	XXXXX									4		161.992		161.992
																	2	119.52	109.672		109.672					2	131.928	144.108		144.108
																	3	358.804	92.928		92.928														T1T2 495 - B1 - Dec1 2011127	2	1		116.9		116.9
																								T1T2-448 het D6 - Oct 26 2011060	2	1	91.482	87.253		87.253							2		66.106		66.106
															T1T2-457 WT E8 Nov 9 2011095	4	1	199.09	146.459		146.459					2	321.602	143.529		143.529
																	2	144.392	88.209		88.209														T1T2 495 - B1 - Dec1 2011128	5	1		167.044		167.044
																	3	XXXXXX	122.773		122.773			T1T2-448 het D6 - Oct 26 2011061	2	1	72.139	60.598		60.598							2		72.155		72.155
																	4	XXXXXX	124.439		124.439					2	381.918	185.001		185.001							3		103.438		103.438
																																					4		64.814		64.814
															T1T2-457 WT E8 Nov 9 2011096	5	1	XXXXXX	70.793		70.793			T1T2-448 het D6 - Oct 26 2011062	3	1	128.191	106.213		106.213							5		89.322		89.322
																	2	XXXXXX	148.07		148.07					2	260.555	108.479		108.479									68.719		68.719
																	3	241.232	78.772		78.772					3	311.219	157.996							T1T2 495 - B1 - Dec1 2011129	5	1		106.721		106.721
																	4	131.488	89.601		89.601																2		96.852		96.852
																	5	89.286	75.205		75.205																3		40.329		40.329
																																					4		115.187		115.187
															T1T2-457 WT E8 Nov 9 2011097	3	1	91.837	77.036		77.036																5		41.082		41.082
																	2	111.866	86.467		86.467
																	3	XXXXXX	130.126		130.126														T1T2 495 - B1 - Dec1 2011130	3	1		74.871		74.871
																																					2		49.396	56.677	106.073
															T1T2-457 WT E8 Nov 9 2011108	3	1	252.446	136.642		136.642																3		58.424		58.424
																	2	41.976	37.656		37.656
																	3	288.141	110.253		110.253														T1T2 495 - B1 - Dec1 2011131	2	1		107.411		107.411
																																					2		122.303		122.303
															T1T2-457 WT E8 Nov 9 2011109	3	1	174.794	125.69		125.69
																	2	103.31	78.224		78.224														T1T2 495 - B1 - Dec1 2011132	2	1		80.848		80.848
																	3	220.518	107.826		107.826																2		125.944		125.944
															T1T2-457 WT E8 Nov 9 2011110	2	1	144.222	81.264		81.264														T1T2 495 - B1 - Dec1 2011133	2	1		129.045		129.045
																	2	156.847	56.733		56.733																2		101.231		101.231
															T1T2-457 WT E8 Nov 9 2011111	6	1	115.109	91.397		91.397														T1T2 495 - B1 - Dec1 2011134	2	1		92.189		92.189
																	2	105.119	85.757		85.757																2		81.328		81.328
																	3	115.741	61.242		61.242
																	4	114.28	59.799		59.799														T1T2 495 - B1 - Dec1 2011135	3	1		117.991		117.991
																	5	136.894	95.052		95.052																2		88.16		88.16
																	6	253.618	123.615		123.615																3		68.318		68.318
															T1T2-457 WT E8 Nov 9 2011112	4	1	313.268	175.971		175.971														T1T2 495 - B1 - Dec1 2011139	4	1	127.472	102.543		102.543
																	2	177.229	113.514		113.514																2	232.467	160.327		160.327
																	3	158.398	91.67		91.67																3	127.413	75.347		75.347
																	4	149.402	86.743		86.743																4	163.683	147.088		147.088
															T1T2-457 WT E8 Nov 9 2011113	4	1	XXXXXX	137.209		137.209														T1T2 495 - B1 - Dec1 2011140	1	1	281.753	194.309		194.309
																	2	388.495	152.774		152.774
																	3	181.739	63.512		63.512														T1T2 495 - B1 - Dec1 2011141	2	1	329.862	57.565	262.364	319.929
																	4	396.294	XXXXXX																		2	106.042	84.147		84.147
															T1T2-457 WT E8 Nov 9 2011114	5	1	132.257	53.103		53.103														T1T2 495 - B1 - Dec1 2011142	5	1	104.077	88.691		88.691
																	2	254.503	140.137		140.137																2	153.639	95.771		95.771
																	3	229.456	162.986		162.986																3	136.971	102.62		102.62
																	4	84.481	59.878		59.878																4	119.407	79.989		79.989
																	5	172.003	59.194		59.194																5	270.49	104.765		104.765
															T1T2-457 WT E8 Nov 9 2011115	2	1	190.129	112.761		112.761														T1T2 495 - B1 - Dec1 2011143	3	1	106.705	63.246		63.246
																	2	293.886	154.312		154.312																2	172.456	116.772		116.772
																																					3	233.754	189.812		189.812
															T1T2-457 WT E8 Nov 9 2011116	3	1	233.549	158.221		158.221
																	2	177.045	70.506		70.506														T1T2 495 - B1 - Dec1 2011144	1	1	201.405	119.868		119.868
																	3	241.205	102.458		102.458																2	89.944	97.716		97.716
																																					3	168.074	117.862		117.862
															T1T2-457 WT E8 Nov 9 2011117	2	1	300.734	88.753	32.757	121.51																4	121.413	78.111		78.111
																	2	107.49	66.859		66.859
																																			T1T2 495 - B1 - Dec1 2011145	4	1	240.252	99.667		99.667
															T1T2-457 WT E8 Nov 9 2011118	4	1	106.104	67.037		67.037																2	303.002	182.983		182.983
																	2	364.198	130.215		130.215																3	126.396	64.651		64.651
																	3	168.003	115.491		115.491																4	116.482	98.571		98.571
																	4	159.201	99.172		99.172
																																			T1T2 495 - B1 - Dec1 2011146	3	1	116.362	95.703		95.703
															T1T2-457 WT E8 Nov 9 2011119	4	1	128.082	92.036		92.036																2	90.244	87.119		87.119
																	2	173.118	95.235		95.235																3	121.491	51.818		51.818
																	3	192.585	105.26		105.26
																	4																		T1T2 495 - B1 - Dec1 2011147	4	1	111.288	72.935		72.935
																																					2	243.742	148.406		148.406
															T1T2-457 WT E8 Nov 9 2011120	2	1	158.433	103.571		103.571																3	88.566	47.558		47.558
																	2	159.765	66.31		66.31																4	114.63	89.268		89.268
															T1T2-457 WT E8 Nov 9 2011121	3	1	181.24	77.557		77.557														T1T2 495 - B1 - Dec1 2011148	2	1	198.436	104.132		104.132
																	2	176.204	160.337		160.337																2	96.664	47.541		47.541
																	3	275.944	102.214		102.214
																																			T1T2 495 - B1 - Dec1 2011149	2	1	166.865	87.909		87.909
															T1T2-457 WT E8 Nov 9 2011122	3	1	180.51	87.075		87.075																2	186.593	111.449		111.449
																	2	123	89.538		89.538
																	3	185.084	90.321		90.321														T1T2 495 - B1 - Dec1 2011150	3	1	201.427	105.959		105.959
																																					2	148.977	88.647		88.647
															T1T2-457 WT E8 Nov 9 2011123	2	1	139.818	74.733		74.733																3	93.477	67.651		67.651
																	2	115.918	102.953		102.953
																																			T1T2 495 - B1 - Dec1 2011151	2	1	187.754	126.49		126.49
															T1T2-457 WT E8 Nov 9 2011124	5	1	176.777	104.219		104.219																2	261.885	216.15		216.15
																	2	220.771	114.066		114.066
																	3	94.366	53.151		53.151														T1T2 495 - B1 - Dec1 2011152	3	1	116.825	87.967		87.967
																	4	114.49	115.387		115.387																2	214.189	103.12		103.12
																	5	XXXXXX	85.336		85.336																3	84	63.496		63.496
															T1T2-457 WT E8 Nov 9 2011125	4	1	296.624	67.97		67.97
																	2	150.083	79.36		79.36
																	3	183.935	82.107		82.107														T1T2-441 KO C6 - Oct 26 2011053		1	110.802	83.299		83.299
																	4	349.464	66.287	59.386	125.673																2		85.351		85.351
																																					3	162.049	82.743		82.743
															T1T2-457 WT E8 Nov 9 2011126	5	1	157.28	59		59
																	2	233.105	132.076		132.076														T1T2-441 KO C6 - Oct 26 2011054		1	86.493	62.332		62.332
																	3	83.546	55.275		55.275																2	239.301	108.296		108.296
																	4	235.765	119.446		119.446																3	199.812	125.123		125.123
																	5	153.222	88.057		88.057
																																			T1T2-441 KO C6 - Oct 26 2011055		1	258.805	118.4		118.4
															T1T2-457 WT E8 Nov 9 2011127	3	1	158.685	97.511		97.511
																	2	244.135	79.519		79.519														T1T2-441 KO C6 - Oct 26 2011056		1	124.471	100.662		100.662
																	3	160.228	99.585		99.585
																																			T1T2-441 KO C6 - Oct 26 2011057		1	106.33	73.186		73.186
															T1T2-457 WT E8 Nov 9 2011128	4	1	427.85	39.56		39.56																2	79.63	71.535		71.535
																	2	283.734	141		141
																	3	241.76	134.931		134.931														T1T2-441 KO C6 - Oct 26 2011058	4	1	xxxxxxxxx	109.718		109.718
																	4	110.422	69.24		69.24																2	194.258	107.504		107.504
																																					3	80.056	87.441		87.441
															T1T2-457 WT E8 Nov 9 2011129	4	1	116.469	117.753		117.753																4	184.024	98.708		98.708
																	2	76.059	58.119		58.119
																	3	210.238	54.009		54.009														T1T2-441 KO C6 - Oct 26 2011059	4	1	260.618	173.422		173.422
																	4	127.224	64.119		64.119																2	xxxxxxxxx	xxxxxxxxx
																																					3	89.32	82.863		82.863
															T1T2-457 WT E8 Nov 9 2011130	2	1	154.564	116.135		116.135																4	287.587	85.709		85.709
																	2	230.339	117.568		117.568
																																			T1T2-441 KO C6 - Oct 26 2011060	4	1	121.655	81.075		81.075
															T1T2-457 WT E8 Nov 9 2011131	2	1	187.211	138.875		138.875																2	305.197	156.277		156.277
																	2	133.959	75.159		75.159																3	96.26	71.975		71.975
																																					4	147.462	57.585		57.585
															T1T2-457 WT E8 Nov 9 2011132	4	1	143.59	79.517		79.517
																	2	XXXXXX	88.59		88.59														T1T2-441 KO C6 - Oct 26 2011061	6	1	xxxxxxxxx	105.873		105.873
																	3	XXXXXX	116.265		116.265																2	164.438	97.806		97.806
																	4	385.389	89.141	89.361	178.502																3	122.483	92.856		92.856
																																					4	211.085	69.127		69.127
															T1T2-457 WT E8 Nov 9 2011133	5	1	305.164	171.063		171.063																5	124.326	81.187		81.187
																	2	XXXXXX	72.265		72.265																6	173.612	76.553		76.553
																	3	80.409	67.242		67.242
																	4	XXXXXX	XXXXXX																T1T2-441 KO C6 - Oct 26 2011062	1	1	169.366	110.94		110.94
																	5	169.706	82.363		82.363
																																			T1T2-441 KO C6 - Oct 26 2011063	5	1	114.495	85.184		85.184
															T1T2-457 WT E8 Nov 9 2011134	3	1	142.394	106.423		106.423																2	xxxxxxxxx	74.156		74.156
																	2	198.517	165.298		165.298																3	112.641	68.007		68.007
																	3	127.252	74.061		74.061																4	53.6	71.193		71.193
																																					5	364.726	87.988	82.752	170.74
															T1T2-457 WT E8 Nov 9 2011135	3	1	323.501	84.328		84.328
																	2	131.488	35.847		35.847														T1T2-441 KO C6 - Oct 26 2011064	3	1	234.196	107.126		107.126
																	3	206.177	133.796		133.796																2	146	83.502		83.502
																																					3	263.321	154.587		154.587
															T1T373 WT - oct 18 2011052	2	1	192.666	69.739		69.739
																	2	279.946	113.992		113.992														T1T2-441 KO C6 - Oct 26 2011065	0	0
															T1T373 WT - oct 18 2011053	1	1	121.803	79.076		79.076														T1T2-441 KO C6 - Oct 26 2011066	3	1	102.728	91.702		91.702
																																					2	xxxxxxxxx	129.642		129.642
															T1T373 WT - oct 18 2011054	5	1	104.293	68.666		68.666																3	270.276	128.953		128.953
																	2	135.718	61.37		61.37
																	3	295.703	116.841		116.841														T1T2-441 KO C6 - Oct 26 2011067	3	1	175.555	133.939		133.939
																	4	198.595	77.178		77.178																2	xxxxxxxxx	75.743		75.743
																	5	168.668	71.624		71.624																3	351.814	163.232		163.232
															T1T373 WT - oct 18 2011055	5	1	97.739	49.649		49.649
																	2	84.723	71.455		71.455														T1T2-441 KO C6 - Oct 26 2011067	3	1	151.539	86.688		86.688
																	3	240.019	124.148		124.148																2		124.329		124.329
																	4	276.669	78.051		78.051																3	154.208	53.032		53.032
																	5	199.06	65.808		65.808
																																			T1T2-441 KO C6 - Oct 26 2011068	2	1	263.638	115.862		115.862
															T1T373 WT - oct 18 2011056	3	1	348.174	90.9		90.9																2	xxxxxxxxx	69.012		69.012
																	2	131.594	64.521		64.521
																	3	174.393	69.754		69.754														T1T2-441 KO C6 - Oct 26 2011069	6	1	107.331	73.492		73.492
																																					2	252.353	107.724		107.724
															T1T373 WT - oct 18 2011057	3	1		90.861		90.861																3	130.419	61.092		61.092
																	2	105.603	65.891		65.891																4	195.205	93.757		93.757
																	3	363.142	75.357	79.808	155.165																5	137.058	67.262		67.262
																																					6	153.47	90.259		90.259
															T1T373 WT - oct 18 2011058	3	1	124.145	116.423		116.423
																	2	129.958	72.335		72.335														T1T2-441 KO C6 - Oct 26 2011070	4	1	134.462	106.015		106.015
																	3	177.539	108.534		108.534																2	181.199	154.814		154.814
																																					3	122.319	92.876		92.876
															T1T373 WT - oct 18 2011059	1	1	232.835	136.129		136.129																4	115.156	72.262		72.262
															T1T373 WT - oct 18 2011060	2	1	156.78	81.888		81.888														T1T2-441 KO C6 - Oct 26 2011071	2	1	298.739	175.22		175.22
																	2	216.518	102.993		102.993																2	206.886	112.389		112.389
															T1T373 WT - oct 18 2011061	4	1	185.456	95.462		95.462														T1T2-441 KO C6 - Oct 26 2011072	2	1	195.059	137.305		137.305
																	2	272.753	72.25		72.25																2	272.029	178.081		178.081
																	3	133.963	96.799		96.799
																	4	282.8	96.799		96.799														T1T2-441 KO C6 - Oct 26 2011073	4	1	242.258	101.647		101.647
																																					2	152.634	85.18		85.18
																																					3	137.931	79.384		79.384
															T1T373 WT - oct 18 2011062	3	1	410.278	79.95		79.95																4	284.297	114.791		114.791
																	2	90.758	72.166		72.166
																	3	196.644	82.669		82.669														T1T2-441 KO C6 - Oct 26 2011074	4	1	180.347	171.226		171.226
																																					2	152.84	102.661		102.661
																																					3	176.977	133.366		133.366
															T1T373 WT - oct 18 2011063	6	1	224.129	109.881		109.881
																	2	169.853	101.222		101.222														T1T2-441 KO C6 - Oct 26 2011075	1	1	164.757	97.176		97.176
																	3	180.967	82.294		82.294
																	4	187.361	54.343		54.343														T1T2-441 KO C6 - Oct 26 2011076	2	1	218.836	92.618		92.618
																	5	158.912	91.012		91.012																2	377.021	105.002		105.002
																	6	81.908	45.122		45.122
																																			T1T2-441 KO C6 - Oct 26 2011077	3	1	251.575	141.199		141.199
															T1T373 WT - oct 18 2011064	7	1	148.003	105.112		105.112																2	148.678	88.29		88.29
																	2	237.811	121.051		121.051																3	xxxxxxxxx	59.03		59.03
																	3	156.438	81.314		81.314
																	4	86.4	98.626		98.626
																	5	111.4	61.135		61.135														T1T2-441 KO C6 - Oct 26 2011079	2	1	XXXXX	62.29		62.29			102.255
																	6	161.623	67.431		67.431																2	235.771	56.4	65.757	122.157
																	7	268.961	108.134		108.134
																																			T1T2-441 KO C6 - Oct 26 2011080	4	1	238.027	139.786		139.786
															T1T373 WT - oct 18 2011065	4	1	258.745	126.125		126.125																2	180.812	80.197		80.197
																	2	110.887	63.358		63.358																3	148.839	105.64		105.64
																	3	128.062	104.595		104.595																4	104.019	62.136		62.136
																	4	295.102	69.623		69.623
																																			T1T2-441 KO C6 - Oct 26 2011081	3	1	276.002	120.603		120.603
															T1T373 WT - oct 18 2011066	6	1	141.46	76.305		76.305																2	326.12	106.435		106.435
																	2	268.119	134.408		134.408																3	254.38	152.949		152.949
																	3	151.855	46.69		46.69
																	4	168.514	48.481		48.481														T1T2-441 KO C6 - Oct 26 2011082	2	1	170	113.643		113.643
																	5	XXXXX	53		53																2	136.565	111.552		111.552
																	6	105	56.889		56.889
																																			T1T2-441 KO C6 - Oct 26 2011083	3	1	262.069	129.901		129.901
															T1T373 WT - oct 18 2011067	3	1	318.496	83.755		83.755																2	165.656	121.157		121.157
																	2	110.277	51.133		51.133																3	171.003	130.851		130.851
																	3	232.106	95.345		95.345
																																			T1T2-441 KO C6 - Oct 26 2011084	3	1	94.372	60.232		60.232
															T1T373 WT - oct 18 2011068	3	1	260.492	210.413		210.413																2	208.777	92.024		92.024
																	2	132.257	98.458		98.458																3	337.285	96.255		96.255
																	3	214.002	71.298		71.298
																																			T1T2-441 KO C6 - Oct 26 2011085	1	1	204.198	149.208		149.208
															T1T373 WT - oct 18 2011069	4	1	XXXXX	172.84		172.84
																	2	104.484	82.979		82.979														T1T2-441 KO C6 - Oct 26 2011086	2	1	287.793	195.483		195.483
																	3	219.92	110.922		110.922																2	121.264	68.295		68.295
																	4	126.036	84.616		84.616
																																			T1T2-441 KO C6 - Oct 26 2011087	2	1	399.08	142.82		142.82
															T1T373 WT - oct 18 2011070	5	1	98.27	82.347		82.347																2	234.35	103.329		103.329
																	2	185.367	83.199		83.199
																	3	140.014	51.624		51.624														T1T2-441 KO C6 - Oct 26 2011088	6	1	141.736	118.983		118.983
																	4	115.624	83.763		83.763																2	XXXXX	XXXXX
																	5	137.615	32.016		32.016																3	159.013	128.688		128.688
																																					4	147.435	57.294
															T1T373 WT - oct 18 2011071	4	1	263.097	65.123	54.037	119.16																5	236.764	120.556		120.556
																	2	113.088	78.6		78.6																6	127.393	92.518		92.518
																	3	91.22	50.249		50.249
																	4	240.252	93.216		93.216														T1T2-441 KO C6 - Oct 26 2011089	3	1	329.619	159.046		159.046
																																					2	150	93.678
															T1T373 WT - oct 18 2011072	7	1	223.652	95.612		95.612																3	277.354	62.442	71.038	133.48
																	2	211.244	51.264		51.264
																	3	86.683	36.401		36.401														T1T2-441 KO C6 - Oct 26 2011090	2	1	233.735	141.759		141.759
																	4	237.489	86.698		86.698
																	5	139.032	88.623		88.623
																	6	160.415	127.752		127.752														T1T2-441 KO C6 - Oct 26 2011091	1	1	171.965	123.784		123.784
																	7	141.227	44.028		44.028
																																			T1T2-441 KO C6 - Oct 26 2011092	2	1	121.754	92.801		92.801
															T1T373 WT - oct 18 2011073	4	1	110.887	63.151		63.151																2	104.307	71.851		71.851
																	2	146.24	91.214		91.214
																	3	281.954	140.982		140.982														T1T2-441 KO C6 - Oct 26 2011093	1	1	117.835	114.196		114.196
																	4	183.218	86.315		86.315
																	5	145.454	79.906		79.906														T1T2-441 KO C6 - Oct 26 2011094	3	1	274.855	137.49		137.49
																																					2	197.434	87.01		87.01
															T1T373 WT - oct 18 2011074	7	1	105.948	75.971		75.971																3	268.419	123.399		123.399
																	2	243.526	112.95		112.95
																	3	174.874	74.673		74.673														T1T2-441 KO C6 - Oct 26 2011095	3	1	157.589	85.969		85.969
																	4	119.641	68.622		68.622																2	147.231	99.191		99.191
																	5	206.189	78.198		78.198																3	330.847	162.047		162.047
																	6	108.812	71.884		71.884
																	7	107.299	42.059		42.059														T1T2-441 KO C6 - Oct 26 2011096	2	1	132.31	95.299		95.299
																																					2	296.897	145.156		145.156
															T1T373 WT - oct 18 2011075	2	1	127.472	52.393		52.393
																	2	88.566	41.795		41.795														T1T2-441 KO C6 - Oct 26 2011097	2	1	XXXXX	XXXXX
																	3	245.106	128.403		128.403																2	XXXXX	XXXXX
															T1T373 WT - oct 18 2011076	3	1	109.005	78.907		78.907														T1T2-441 KO C6 - Oct 26 2011098	3	1	133.701	97.161		97.161
																	2	132.608	55.154		55.154																2	196.469	92.522		92.522
																	3	141.993	87.404		87.404																3	84.172	44.555		44.555
															T1T373 WT - oct 18 2011077	5	1	169.035	45.255		45.255														T1T2-441 KO C6 - Oct 26 2011099	2	1	346.919	156.129		156.129
																	2	131.042	74.139		74.139																2	109.731	67.344		67.344
																	3	162.388	55.803		55.803
																	4	XXXXX	40.361		40.361														T1T2-441 KO C6 - Oct 26 2011100	2	1	254.804	150.131		150.131
																	5	213.009	84.812		84.812																2	136.4	71.277		71.277
															T1T373 WT - oct 18 2011078	3	1	437.979	64.195	69.57	133.765														T1T2-441 KO C6 - Oct 26 2011101	1	1	234.61	72.602	73.12	145.722
																	2	162.542	86.964		86.964
																	3	281.626	75.661		75.661														T1T2-441 KO C6 - Oct 26 2011102	2	1	135.351	76.439		76.439
																																					2	212.869	104.723		104.723
															T1T373 WT - oct 18 2011079	3	1	XXXXX	112.833		112.833
																	2	101.415	73.487		73.487														T1T2-441 KO C6 - Oct 26 2011103	3	1	116.108	98.75		98.75
																	3	260.722	135.244		135.244																2	164.11	110.416		110.416
																																					3	274.345	163.095		163.095
															T1T373 WT - oct 18 2011080	5	1	90.471	60.745		60.745
																	2	155.416	82.46		82.46														T1T2-441 KO C6 - Oct 26 2011104	1	1	145.121	95.152		95.152
																	3	108.231	75.679		75.679
																	4	179.011	103.327		103.327														T1T2-441 KO C6 - Oct 26 2011105	2	1	203.961	131.771		131.771
																	5	216.342	108.318		108.318																2	165.702	96.84		96.84
															T1T373 WT - oct 18 2011081	3	1	219.866	159.666		159.666														T1T2-441 KO C6 - Oct 26 2011106	6	1	187.2	107.415		107.415
																	2	234.03	142.895		142.895																2	158.221	142.844		142.844
																	3	152.977	79.026		79.026																3	191.207	117.599		117.599
																																					4	57.871	45.574		45.574
															T1T373 WT - oct 18 2011082	5	1	110.055	79.294		79.294																5	146.349	84.964		84.964
																	2	141.549	83.029		83.029																6	149.03	89.191		89.191
																	3	192.72	79.926		79.926																	137.244	109.583		109.583
																	4	282.708	89.761		89.761
																	5	142.243	91.763		91.763														T1T2-441 KO C6 - Oct 26 2011107	3	1	110.454	77.305		77.305
																																					2	135.207	86.441		86.441
															T1T373 WT - oct 18 2011083	3	1	116.97	86.646		86.646																3	89.889	67.564		67.564
																	2	179.805	104.35		104.35
																	3	259.326	120.793		120.793														T1T2-441 KO C6 - Oct 26 2011108	3	1	272.575	129.909		129.909
																																					2	222.926	133.584		133.584
															T1T373 WT - oct 18 2011084	5	1	118.068	60.083		60.083																3	306.026	62.223		62.223
																	2	106.677	37.696		37.696
																	3	135.133	68		68														T1T2-441 KO C6 - Oct 26 2011109	1	1	243.288	124.265		124.265
																	4	195.028	71.192		71.192
																	5	213.6	100.034		100.034														T1T2-441 KO C6 - Oct 26 2011110	2	1	191.802	81.594		81.594
																																					2	194.487	130.657		130.657
															T1T373 WT - oct 18 2011085	4	1	187.446	91.25		91.25
																	2	129.201	86.983		86.983														T1T2-441 KO C6 - Oct 26 2011111	4	1	232.757	130.009		130.009
																	3	252.301	149.272		149.272																2	316.082	143.258		143.258
																	4	286.681	84.599		84.599																3	328.093	149.113		149.113
																																					4	152.322	81.35		81.35
															T1T373 WT - oct 18 2011086	5	1		85.183		85.183
																	2	189.188	49.659	44.045	93.704														T1T2-441 KO C6 - Oct 26 2011112	5	1	77.827	41.541		41.541
																	3	323.371	135.318		135.318																2	317.844	81.989		81.989
																	4		102.29		102.29																3	114.586	56.752		56.752
																	5	150.266	58.606		58.606																4	98.184	65.815		65.815
																																					5	310.002	69.002	85.054	154.056
															T1T373 WT - oct 18 2011087	3	1	202.193	110.194		110.194
																	2	172.792	61.161		61.161														T1T2-441 KO C6 - Oct 26 2011113	4	1	181.618	117.31		117.31
																	3	209.688	104.765		104.765																2	248.115	151.874		151.874
																																					3	XXXXX	XXXXX
															T1T373 WT - oct 18 2011088	7	1	93.744	24.187		24.187																4	320.403	146.208		146.208
																	2	183.565	70.299		70.299
																	3	141.028	61.772		61.772														T1T2-441 KO C6 - Oct 26 2011114	4	1	266.312	147.314		147.314
																	4	139.402	46.011		46.011																2	89.627	86.369		86.369
																	5	111.826	77.398		77.398																3	147.272	89.048		89.048
																	6	100.722	66.276		66.276																4	70.228	46.926		46.926
																	7	58.822	35.777		35.777
																																			T1T2-441 KO C6 - Oct 26 2011115	4	1	144.941	97.185		97.185
															T1T373 WT - oct 18 2011089	3	1	112.721	60.823		60.823																2	XXXXX	88.104		88.104
																	2	144.014	81.992		81.992																3	228.09	61.698		61.698
																	3	141.566	76.609		76.609																4	187.771	126.163		126.163
															T1T373 WT - oct 18 2011090	3	1	140.004	104.889		104.889														T1T2-441 KO C6 - Oct 26 2011116	3	1	125.67	88.741		88.741
																	2	192.606	69.754		69.754																2	221.939	98.229		98.229
																	3	269.208	92.163		92.163																3	151.921	53.24		53.24
															T1T373 WT - oct 18 2011091	3	1	111.611	95.777		95.777														T1T2-441 KO C6 - Oct 26 2011117	2	1	246.812	172.371		172.371
																	2	124.483	86.31		86.31																2	93.172	49.764		49.764
																	3	136.565	71.396		71.396
																																			T1T2-441 KO C6 - Oct 26 2011118	1	1	288.721	157.355		157.355
															T1T373 WT - oct 18 2011092	4	1	158.521	62.402		62.402
																	2	142.636	92.233		92.233														T1T2-441 KO C6 - Oct 26 2011119	3	1	138.654	85.723		85.723
																	3	167.045	39.925		39.925																2	294.898	58.531	90.071	148.602
																	4	73.41	65.827		65.827																3	201.695	31.305		31.305
															T1T373 WT - oct 18 2011093	3	1	124.258	65.751		65.751														T1T2-441 KO C6 - Oct 26 2011120	3	1	146.537	119.123		119.123
																	2	158.319	50.804		50.804																2	195.438	131.004		131.004
																	3	170.423	99.229		99.229																3	104.12	74.942		74.942
															T1T373 WT - oct 18 2011094	3	1	211.625	56.08		56.08														T1T2-441 KO C6 - Oct 26 2011121	3	1	214.514	148.531		148.531
																	2	157.544	104.708		104.708																2	243.446	140.144		140.144
																	3	107.336	75.205		75.205																3	173.787	132.23		132.23
															T1T373 WT - oct 18 2011095	3	1	310.247	166.47		166.47														T1T2-441 KO C6 - Oct 26 2011122	1	1	292.535	189.74		189.74
																	2	169.012	65.139		65.139
																	3	279.12	117.074		117.074														T1T2-441 KO C6 - Oct 26 2011123	2	1	500.277	139.202		139.202
																																					2	110.788	75.522		75.522
															T1T373 WT - oct 18 2011096	4	1	277.115	148.91		148.91
																	2	354.318	68.68		68.68														T1T2-441 KO C6 - Oct 26 2011124	4	1	167.108	88.084		88.084
																	3	191.003	56.851		56.851																2	186.703	70.742		70.742
																	4	232.175	85.567		85.567																3	200.282	78.637		78.637
																																					4	177.178	117.854		117.854
															T1T373 WT - oct 18 2011097	4	1	132.834	80.866		80.866
																	2	272.281	59.363		59.363														T1T2-441 KO C6 - Oct 26 2011125	2	1	135.03	130.661		130.661
																	3	162.595	55.326		55.326																2	170.485	44.598		44.598
																	4	164.514	97.664		97.664
																																			T1T2-441 KO C6 - Oct 26 2011126	4	1	263.048	92.78		92.78
															T1T373 WT - oct 18 2011098	7	1	XXXXX	68.007		68.007																2	293.483	189.056		189.056
																	2	145.413	61.057		61.057																3	162.788	92.965		92.965
																	3	128.565	90.427		90.427																4	133.686	79.399		79.399
																	4	143.199	87.321		87.321
																	5	124.724	83.657		83.657														T1T2-441 KO C6 - Oct 26 2011127	3	1	83.385	79.496		79.496
																	6	110.422	81.181		81.181																2	128.098	79.938		79.938
																	7	135.794	74.01		74.01																3	134.332	66.172		66.172
																	8	100.658	89.087		89.087
																																			T1T2-441 KO C6 - Oct 26 2011128	3	1	106	49.348		49.348
															T1T373 WT - oct 18 2011099	4	1	121.709	67.232		67.232																2		35.228		35.228
																	2	123.81	62.489		62.489																3	180.294	114.799		114.799
																	3	136.191	47.856		47.856
																	4	109.385	63.388		63.388														T1T2-441 KO C6 - Oct 26 2011129	4	1	148.007	94.841		94.841
																																					2	128.55	75.792		75.792
															T1T373 WT - oct 18 2011100	1	1	268.151	124.438		124.438																3	156.518	92.24		92.24
																																					4	277.186	141.072		141.072
															T1T373 WT - oct 18 2011101	4	1	121.037	55.577		55.577
																	2	79.649	58.888		58.888														T1T2-441 KO C6 - Oct 26 2011130	4	1	324.895	163.843		163.843
																	3	147.99	98.35		98.35																2	184.808	52.929		52.929
																	4	155.589	46.615		46.615																3	70.682	76.386		76.386
																																					4	104.278	44.87		44.87
															T1T373 WT - oct 18 2011102	3	1	258.898	174.256		174.256
																	2	190.979	128.992																T1T2-441 KO C6 - Oct 26 2011131	3	1	126.115	89.532		89.532
																	3																				2	272.905	162.612		162.612
																																					3	283.478	55.163	50.915	106.078
															T1T373 WT - oct 18 2011103	7	1	218.387	117.098		117.098
																	2	92.136	66.505		66.505
																	3	369.486	64.141		64.141
																	4	333.084	76.137		76.137														T1T2 497 - C1 - Dec 1 2011070	4	1	160.012	84.9		84.9
																	5	149.616	70.179		70.179																2	118.229	82.026		82.026
																	6	160.602	123.273		123.273																3	109.604	67.022		67.022
																	7	153.003	75		75																4	90.477	99.536		99.536
															T1T373 WT - oct 18 2011104	4	1	66.843	77.577		77.577														T1T2 497 - C1 - Dec 1 2011071	3	1	158.382	109.642		109.642
																	2	170.038	102.678		102.678																2	272.927	167.825		167.825
																	3	326.833	186.817		186.817																3	88.091	73.673		73.673
																	4	170.062	128.838		128.838
																																			T1T2 497 - C1 - Dec 1 2011072	2	1	110.476	49.518		49.518
															T1T373 WT - oct 18 2011105	3	1	113.23	78.654		78.654																2	107.48	86.191		86.191
																	2	122.577	49.031		49.031
																	3	252.002	121.801		121.801														T1T2 497 - C1 - Dec 1 2011073	2	1	182.455	100.366		100.366
																																					2	134.648	66.287		66.287
															T1T373 WT - oct 18 2011106	4	1	154.742	100.646		100.646
																	2	131.472	77.92		77.92														T1T2 497 - C1 - Dec 1 2011074	4	1	215.337	140.6		140.6
																	3	309.716	186.01		186.01																2	257.099	103.159		103.159
																	4	133.255	88.411		88.411																3	183.853	96.963		96.963
																																					4	127.738	111.1		111.1
															T1T373 WT - oct 18 2011107	4	1	205.854	65.056		65.056
																	2	253.071	137.784		137.784														T1T2 497 - C1 - Dec 1 2011075	3	1	95.525	51.962		51.962
																	3	152.191	57.468		57.468																2	177.89	86.506		86.506
																	4	121.655	47.866		47.866																3	85.866	51.534		51.534
															T1T373 WT - oct 18 2011108	4	1	260.094	130.768		130.768														T1T2 497 - C1 - Dec 1 2011076	3	1	173.899	97.566		97.566
																	2	109.115	71.753		71.753																2	187.043	63.544		63.544
																	3	123.065	111.413		111.413																3	227.903	105.355		105.355
																	4	316.078	XXXXX
																																			T1T2 497 - C1 - Dec 1 2011077	5	1	106.301	75.288		75.288
															T1T373 WT - oct 18 2011109	5	1	89.022	69.884		69.884																2	158.041	132.148		132.148
																	2	166.901	83.745		83.745																3	218.799	154.609		154.609
																	3	67.119	38.699		38.699																4	83.385	85.424		85.424
																	4	93.038	39.395		39.395																5	164.73	112.535		112.535
																	5	123.709	72.461		72.461
																	6	211.729	59.091		59.091														T1T2 497 - C1 - Dec 1 2011078	5	1	176.955	100.605		100.605
																																					2	130.863	76.807		76.807
															T1T373 WT - oct 18 2011110	5	1	109.659	49.962		49.962																3	106.283	81.848		81.848
																	2	177.882	53.159		53.159																4	85.703	68.656		68.656
																	3	83.217	80.938		80.938																5	121.824	117.003		117.003
																	4	190.066	106.375		106.375
																	5	XXXXX	92.063		92.063														T1T2 497 - C1 - Dec 1 2011079	3	1	141.439	64.526		64.526
																																					2	81.707	76.621	60.806	137.427
															T1T373 WT - oct 18 2011111	5	1	138.177	117.366		117.366																3	337.522	57.814		57.814
																	2	122	59.21		59.21
																	3	148.637	81.608		81.608														T1T2 497 - C1 - Dec 1 2011080	1	1	117.886	76.819		76.819		98.0436		99.2736	XXXXX
																	4	130.771	43.417		43.417
																	5	224.179	106.664		106.664														T1T2 497 - C1 - Dec 1 2011081	4	1	86.267	61.64		61.64
																																					2	118.089	91.748		91.748
															T1T373 WT - oct 18 2011112	4	1	XXXXX	XXXXX																		3	257.194	119.68		119.68
																	2	146.11	118.379		118.379																4	136.308	67.665		67.665
																	3	261.082	82.247	31.385	113.632
																	4	193.982	80.31		80.31														T1T2 497 - C1 - Dec 1 2011082	4	1	262.053	135.626		135.626
																																					2	92.439	49.649		49.649
															T1T373 WT - oct 18 2011113	5	1	112.147	86.398		86.398																3	168.55	92.414		92.414
																	2	396.062	96.56	76.224	172.784																4	275.588	77.978		77.978
																	3	91.679	70.362		70.362
																	4	107.424	83.405		83.405														T1T2 497 - C1 - Dec 1 2011083	1	1	168.19	100.324		100.324
																	5	159.261	73.864		73.864
																																			T1T2 497 - C1 - Dec 1 2011084	3	1	195.167	115.601		115.601
															T1T373 WT - oct 18 2011114	8	1	288.444	140.948		140.948																2	78.16	68.718		68.718
																	2	114.965	64.506		64.506																3	113.358	61.059		61.059
																	3	198.172	117.343		117.343
																	4	113.283	67.174		67.174														T1T2 497 - C1 - Dec 1 2011085	3	1	276.632	130.456		130.456
																	5	XXXXX	100.705		100.705																2	193.065	142.375		142.375
																	6	98.27	82.818		82.818																3	126.127	47.804		47.804
																	7	83.57	78.412		78.412
																	8	93.723	59.377		59.377														T1T2 497 - C1 - Dec 1 2011086	2	1	113.565	77.22		77.22
																																					2	208.856	98.265		98.265
															T1T373 WT - oct 18 2011115	6	1	161.047	102.891		102.891
																	2	125.252	38.147		38.147														T1T2 497 - C1 - Dec 1 2011087	4	1	162.308	129.027		129.027
																	3	110.494	60.577		60.577																2	200.691	129.116		129.116
																	4	151.38	77.193		77.193																3	163.23	104.726		104.726
																	5	136.059	59.931		59.931																4	189.235	73.837		73.837
																	6	XXXXX	73.056		73.056
																																			T1T2 497 - C1 - Dec 1 2011088	2	1	219.495	97.113		97.113
															T1T373 WT - oct 18 2011116	3	1	118.068	72.082		72.082																2	94.26	76.355		76.355
																	2	139.714	110.499		110.499
																	3	94.048	43.344		43.344														T1T2 497 - C1 - Dec 1 2011089	4	1	262.469	179.236		179.236
																																					2	159.327	71.884		71.884
															T1T373 WT - oct 18 2011117	4	1	152.738	51.205		51.205																3	239.633	137.049		137.049
																	2	125.16	68.204		68.204																4	163.083	68.276		68.276
																	3	174.748	94.908		94.908
																	4	144.125	84.61		84.61														T1T2 497 - C1 - Dec 1 2011090	3	1	152.643	128.612		128.612
																																					2	229.652	124.813		124.813
															T1T373 WT - oct 18 2011118	3	1	175.114	131.976		131.976																3	162.825	60.533		60.533
																	2	179.602	107.027		107.027
																	3	200.878	117.205		117.205														T1T2 497 - C1 - Dec 1 2011091	4	1	141.852	102.547		102.547
																																					2	160.24	74.279		74.279
															T1T373 WT - oct 18 2011119	2	1	204	151.387		151.387																3	164.924	66.529		66.529
																	2	317.624	154.612		154.612																4	140.769	63.862		63.862
															T1T373 WT - oct 18 2011120	5	1	306.544	169.258		169.258														T1T2 497 - C1 - Dec 1 2011092	3	1	260.05	159.723		159.723
																	2	179.778	65.605		65.605																2	402.934	93.512		93.512
																	3	71.512	51.589		51.589																3	146.031	95.114		95.114
																	4	316.809	83.238		83.238
																	5	XXXXX	XXXXX																T1T2 497 - C1 - Dec 1 2011093	2	1	201.301	137.948		137.948
																																					2	185.367	91.516		91.516
															T1T2-374 WT - C1 - Oct 26 2011052	1	1	255.196	110.878		110.878
																																			T1T2 497 - C1 - Dec 1 2011094	4	1	193.352	128.969		128.969
															T1T2-374 WT - C1 - Oct 26 2011053	4	1	171.549	151.445		151.445																2	138.004	86.489		86.489
																	2	104.805	88.662		88.662																3	207.885	77.863		77.863
																	3	214.462	55.761		55.761																4	238.531	67.171		67.171
																	4	207.386	76.724		76.724
																																			T1T2 497 - C1 - Dec 1 2011095	3	1	98.372	64.225		64.225
															T1T2-374 WT - C1 - Oct 26 2011054	5	1	149.201	48.577		48.577																2	92.347	87.124		87.124
																	2	117.546	72.165		72.165																3	182.562	143.439		143.439
																	3	114.004	73.166		73.166
																	4	248.709	111.373		111.373														T1T2 497 - C1 - Dec 1 2011096	7	1	169	109.444		109.444
																	5	177.133	66.082		66.082																2	185.521	89.506		89.506
																																					3	253.842	126.853		126.853
															T1T2-374 WT - C1 - Oct 26 2011055	5	1	XXXXXX	84.202		84.202																4	162.197	45		45
																	2	109.659	76.423		76.423																5	189.423	85.645		85.645
																	3	69.181	66.574		66.574																6	113.437	74.063		74.063
																	4	187.278	83.877		83.877																7	144.499	65.878		65.878
																	5	257.63	89.166		89.166
																																			T1T2 497 - C1 - Dec 1 2011097	4	1	104.738	96.859		96.859
															T1T2-374 WT - C1 - Oct 26 2011056	4	1	121.824	73.77		73.77																2	141.209	93.521		93.521
																	2	152.329	62.059		62.059																3	99.156	69.206		69.206
																	3	204.353	64.648		64.648																4	154.467	93.203		93.203
																	4	120.967	72.498		72.498
																																			T1T2 497 - C1 - Dec 1 2011098	5	1	181.43	118.668		118.668
															T1T2-374 WT - C1 - Oct 26 2011057	4	1	279.652	46.519	72.564	119.083																2	113.071	66.269		66.269
																	2	154.35	51.272		51.272																3	188.215	88.752		88.752
																	3	181.574	81.099		81.099																4	199.331	132.793		132.793
																	4	148.003	62.712		62.712																5	179.12	140.764		140.764
															T1T2-374 WT - C1 - Oct 26 2011058	2	1	145.499	76.499		76.499														T1T2 497 - C1 - Dec 1 2011099	5	1	236.685	143.009		143.009
																	2	131.046	86.871		86.871																2	112.294	73.178		73.178
																																					3	82.976	90.212		90.212
															T1T2-374 WT - C1 - Oct 26 2011059	6	1	276.525	65.123		65.123																4	135.207	75.901		75.901
																	2	80.262	66.841		66.841																5	100.623	57.744		57.744
																	3	217.267	68.018		68.018
																	4	202.704	87.001		87.001														T1T2 497 - C1 - Dec 1 2011100	6	1	109.708	64.312		64.312
																	5	168.297	79.057		79.057																2	117.388	115.579		115.579
																	6	90.449	81.162		81.162																3	328.722	163.372		163.372
																																					4	284.951	90.365	44.105	134.47
															T1T2-374 WT - C1 - Oct 26 2011060	5	1	74.947	56.97		56.97																5	228.561	68.323	61.485	129.808
																	2	239.585	68.85		68.85																6	101.242	59.471		59.471
																	3	207.068	142.258		142.258
																	4	119.218	72.688		72.688														T1T2 497 - C1 - Dec 1 2011101	3	1	261.228	161.686		161.686
																	5	160.702	103.326		103.326																2	XXXXX	XXXXX
																																					3	231.041	112.631		112.631
															T1T2-374 WT - C1 - Oct 26 2011061	3	1	126.874	78.435		78.435
																	2	159.389	77.345		77.345														T1T2 497 - C1 - Dec 1 2011102	2	1	270.407	69.487	92.452	161.939
																	3	132.503	67.912		67.912																2	99.02	55.451		55.451
															T1T2-374 WT - C1 - Oct 26 2011062	6	1	104.623	60.209		60.209														T1T2 497 - C1 - Dec 1 2011103	3	1	175.111	114.772		114.772
																	2	111.893	90.104		90.104																2	91.285	71.794		71.794
																	3	112.071	63.169		63.169																3	210.737	109.915		109.915
																	4	XXXXX	75.007		75.007
																	5	XXXXX	105.247		105.247														T1T2 497 - C1 - Dec 1 2011104	2	1	331.699	147.948		147.948
																	6	158.051	74.053		74.053																2	125.543	95.276		95.276
															T1T2-374 WT - C1 - Oct 26 2011063	9	1	160	45.836		45.836														T1T2 497 - C1 - Dec 1 2011105	5	1	188.279	82.184		82.184
																	2	119.817	55.543		55.543																2	268.745	78.455		78.455
																	3	191.719	130.25		130.25																3	134.164	65.141		65.141
																	4	107.355	48.147		48.147																4	XXXXX	XXXXX
																	5	238.472	73.837		73.837																5	157.099	90.034		90.034
																	6	96.566	39.924		39.924
																	7	125	53.477		53.477														T1T2 497 - C1 - Dec 1 2011106	2	1	239.019	134.415		134.415
																	8	135.204	69.297		69.297																2	175.445	100.787		100.787
																	9	86.371	43.345		43.345
																																			T1T2 497 - C1 - Dec 1 2011107	3	1	118.296	111.59		111.59
															T1T2-374 WT - C1 - Oct 26 2011064	4	1	111.113	97.565		97.565																2	272.606	107.946		107.946
																	2	XXXXX	XXXXX																		3	154.806	89.937		89.937
																	3	60	34.293		34.293
																	4	93.606	73.124		73.124														T1T2 497 - C1 - Dec 1 2011108	4	1	242.244	130.037		130.037
																																					2	193	95.183		95.183
															T1T2-374 WT - C1 - Oct 26 2011065	6	1	284.176	102.928		102.928																3	158.824	87.447		87.447
																	2	139.846	111.885		111.885																4	167.362	97.745		97.745
																	3	74.813	73.109		73.109
																	4	XXXXX	175.376		175.376														T1T2 497 - C1 - Dec 1 2011109	4	1	248.485	151.917		151.917
																	5	93.059	106.255		106.255																2	271.737	159.245		159.245
																	6	225.18	45.403		45.403																3	84.172	89.775		89.775
																																					4	166.193	70.882		70.882
															T1T2-374 WT - C1 - Oct 26 2011066	5	1	136.341	32.709		32.709
																	2	192.772	84.078		84.078														T1T2 497 - C1 - Dec 1 2011110	2	1	256.125	148.874		148.874
																	3	180.469	32.394		32.394																2	281.4	149.311		149.311
																	4	227.403	66.799		66.799
																	5	XXXXX	87.852		87.852														T1T2 497 - C1 - Dec 1 2011111	3	1	90.139	69.109		69.109
																																					2	197.608	89.352		89.352
															T1T2-374 WT - C1 - Oct 26 2011067	6	1	77.795	49.041		49.041																3	225.763	84.34		84.34
																	2	137.233	100.871		100.871
																	3	230.341	107.036		107.036														T1T2 497 - C1 - Dec 1 2011112	2	1	131.042	80.993		80.993
																	4	220.02	120.386		120.386																2	97.329	102.622		102.622
																	5	167.505	106.836		106.836
																	6	186.904	82.378		82.378														T1T2 497 - C1 - Dec 1 2011113	3	1	109.33	68.194		68.194
																																					2	255.783	137.039		137.039
															T1T2-374 WT - C1 - Oct 26 2011068	4	1	89.107	97.612		97.612																3	246.984	123.548		123.548
																	2	122.004	98.002		98.002
																	3	193.67	112.811		112.811														T1T2 497 - C1 - Dec 1 2011114	3	1	244.295	113.609		113.609
																	4	120.416	80.082		80.082																2	114.057	79.648		79.648
																																					3	110.168	66.664		66.664
															T1T2-374 WT - C1 - Oct 26 2011069	7	1	95.854	76.232		76.232
																	2	164.195	48.882		48.882														T1T2 497 - C1 - Dec 1 2011115	4	1	96.509	69.127		69.127
																	3	89.14	92.179		92.179																2	237.497	156.492		156.492
																	4	94.085	78.108		78.108																3	247.536	98.135		98.135
																	5	97.247	87.634		87.634																4	210.09	127.697		127.697
																	6	162.816	97.87		97.87
																	7	222.248	42.471	66.147	108.618														T1T2 497 - C1 - Dec 1 2011116	4	1	242.043	184.792		184.792
																																					2	279.517	146.834		146.834
															T1T2-374 WT - C1 - Oct 26 2011070	3	1	167.045	102.834		102.834																3	124.964	70.35		70.35
																	2	130.081	93.246		93.246																4	189.974	67.753		67.753
																	3	144.309	114.063		114.063
																																			T1T2 497 - C1 - Dec 1 2011117	3	1	181	120.875		120.875
															T1T2-374 WT - C1 - Oct 26 2011071	4	1	303.2	57.28		57.28																2	153.844	87.373		87.373
																	2	XXXXX	XXXXX																		3	102.694	89.559		89.559
																	3	222.02	160.093		160.093
																	4	90.918	70.41		70.41														T1T2 497 - C1 - Dec 1 2011118	8	1	151.208	106.695		106.695
																																					2	62.201	37.84		37.84
															T1T2-374 WT - C1 - Oct 26 2011072																						3	208.677	127.751		127.751
																																					4	242.553	209.876		209.876
																																					5	136.953	88.909		88.909
															T1T2-374 WT - C1 - Oct 26 2011073	3	1	85.376	50.488		50.488																6	127.063	102.025		102.025
																	2	257.498	104.065		104.065																7	71.197	71.614		71.614
																	3	172.325	41.674		41.674																8	151.793	78.839		78.839
															T1T2-374 WT - C1 - Oct 26 2011074	7	1	249.195	98.395		98.395														T1T2 497 - C1 - Dec 1 2011119	5	1	95.189	76.662		76.662
																	2	160.253	78.468		78.468																2	110.752	74.956		74.956
																	3	121.413	75.744		75.744																3	129.244	76.025		76.025
																	4	271.562	47.147		47.147																4	161.05	93.542		93.542
																	5	XXXXX	68.499		68.499																5	117.614	50.497		50.497
																	6	110.345	68.696		68.696
																	7	256.018	109.417		109.417														T1T2 497 - C1 - Dec 1 2011120	3	1	262.937	161.201		161.201
																																					2	145.496	86.525		86.525
															T1T2-374 WT - C1 - Oct 26 2011075	7	1	76.655	70.786		70.786																3	242.72	85.274		85.274
																	2	276.904	58.148		58.148
																	3	443.086	80.777		80.777														T1T2 497 - C1 - Dec 1 2011121	2	1	231.625	133.81		133.81
																	4	XXXXX	92.101		92.101																2	223.893	111.394		111.394
																	5	243.508	78.525		78.525
																	6	80.399	53.681		53.681														T1T2 497 - C1 - Dec 1 2011122	2	1	140.089	122.681		122.681
																	7	215.035	102.326		102.326																2	261.962	129.116		129.116
															T1T2-374 WT - C1 - Oct 26 2011076	4	1	XXXXX	XXXXX																T1T2 497 - C1 - Dec 1 2011123	5	1	184.174	105.032		105.032
																	2	211.123	120.634		120.634																2	197.205	164.26		164.26
																	3	161.137	98.462		98.462																3	123.794	91.629		91.629
																	4	90.736	60.907		60.907																4	111.544	99.057		99.057
																																					5	175.801	99.896		99.896
															T1T2-374 WT - C1 - Oct 26 2011077	4	1	244.739	61.017	74.11	135.127
																	2	154.674	108.468		108.468														T1T2 497 - C1 - Dec 1 2011124	4	1	120.603	62.952		62.952
																	3	217.497	107.889		107.889																2	304.385	133.214		133.214
																	4	137.186	69.722		69.722																3	127.142	101.408		101.408
																																					4	101.533	66.026		66.026
															T1T2-374 WT - C1 - Oct 26 2011078	5	1	233.452	107.29		107.29
																	2	148.368	68.958		68.958														T1T2 497 - C1 - Dec 1 2011125	3	1	117.388	64.605		64.605
																	3	153.075	60.396		60.396																2	107.629	64.175		64.175
																	4	193.546	135.297		135.297																3	281.704	92.972		92.972
																	5	XXXXX	28.018		28.018
																																			T1T2 497 - C1 - Dec 1 2011126	6	1	98.762	48.209		48.209
															T1T2-374 WT - C1 - Oct 26 2011079	3	1	153.834	107.261		107.261																2	148.57	110.686		110.686
																	2	139.714	96.344		96.344																3	205.682	118.78		118.78
																	3	77.666	78.785		78.785																4	XXXXX	XXXXX
																																					5	84.812	38.752		38.752
															T1T2-374 WT - C1 - Oct 26 2011080	4	1	63.953	61.62		61.62																6	110.073	50.341		50.341
																	2	110.941	86.218		86.218
																	3	149.723	65.481		65.481
																	4	137.928	48.182		48.182
															T1T2-374 WT - C1 - Oct 26 2011081	6	1	201.675	118.375		118.375
																	2	126.02	73.678		73.678
																	3	140.186	100.499		100.499
																	4	117.388	32.416		32.416
																	5	276.409	90.545		90.545
																	6	197.041	129.913		129.913
															T1T2-374 WT - C1 - Oct 26 2011082	6	1	63.561	47.483		47.483
																	2	179.622	134.198		134.198
																	3	147.665	117.425		117.425
																	4	171.143	101.886		101.886
																	5	180.228	105.664		105.664
																	6	243.378	106.494		106.494
															T1T2-374 WT - C1 - Oct 26 2011083	5	1	122.201	71.612		71.612
																	2	94.366	47.448		47.448
																	3	260.317	60.019		60.019
																	4	262.932	112.062		112.062
																	5	150.562	77.21		77.21
															T1T2-374 WT - C1 - Oct 26 2011084	8	1	192.44	83.529		83.529
																	2	246.1	41.439		41.439
																	3	106.888	91.54		91.54
																	4	158.521	89.003		89.003
																	5	126.02	57.692		57.692
																	6	144.627	82.696		82.696
																	7	140.129	49.207		49.207
																	8	102.02	31.648		31.648
															T1T2-374 WT - C1 - Oct 26 2011085	5	1	162.856	85.444		85.444
																	2	136.029	67.383		67.383
																	3	122.319	53.868		53.868
																	4	151.182	84.365		84.365
																	5	266.807	119.299		119.299
															T1T2-374 WT - C1 - Oct 26 2011086	4	1	281.002	54.709		54.709
																	2	389.955	114.984		114.984
																	3	222.657	47.171		47.171
																	4	97.801	55.194		55.194
															T1T2-374 WT - C1 - Oct 26 2011087	1	1	217.205	128.506		128.506
															T1T2-374 WT - C1 - Oct 26 2011088	7	1	134.239	46.702		46.702
																	2	191.51	38.21		38.21
																	3	262.835	113.971		113.971
																	4	156.426	95.084		95.084
																	5	60.033	61.346		61.346
																	6	109.124	60.415		60.415
																	7	198.769	108.97		108.97
															T1T2-374 WT - C1 - Oct 26 2011089	6	1	149.773	38.445		38.445
																	2	106.471	65.705		65.705
																	3	126.004	74.149		74.149
																	4	239.14	105.814		105.814
																	5	100.285	52.881		52.881
																	6	178.138	70.73		70.73
															T1T2-374 WT - C1 - Oct 26 2011090	3	1	122	86.498		86.498
																	2	164.012	84.166		84.166
																	3	159.364	88.93		88.93
															T1T2-374 WT - C1 - Oct 26 2011091	4	1	236.578	85.046		85.046
																	2	120.748	68.298		68.298
																	3	238.657	99.981		99.981
																	4	244.696	56.038	71.677	127.715
															T1T2-374 WT - C1 - Oct 26 2011092	7	1	67.119	58.138		58.138
																	2	138.885	97.295		97.295
																	3	260.969	136.539		136.539
																	4	XXXXX	42.953		42.953
																	5	112.947	79.372		79.372
																	6	94.414	54.245		54.245
																	7	188.82	127.194		127.194
															T1T2-374 WT - C1 - Oct 26 2011093	3	1	238.355	57.871		57.871
																	2	320.751	68.197		68.197
																	3	230.002	166.919		166.919
															T1T2-374 WT - C1 - Oct 26 2011094	7	1	148.862	45.714		45.714
																	2	170.062	68.936		68.936
																	3	220.735	114.211		114.211
																	4	83.487	39.032		39.032
																	5	184.201	145.595		145.595
																	6	266.582	139.16		139.16
																	7	117.546	58.645		58.645
															T1T2-374 WT - C1 - Oct 26 2011095	6	1	103.697	69.857		69.857
																	2	95.52	69.69		69.69
																	3	222.081	126.096		126.096
																	4	85.44	75.987		75.987
																	5	68.819	56.178		56.178
																	6	137.713	85.516		85.516
															T1T2-374 WT - C1 - Oct 26 2011096	3	1	109.179	65.077		65.077
																	2	78	69.22		69.22
																	3	300.673	64.923		64.923
															T1T2-374 WT - C1 - Oct 26 2011097	5	1	241.961	112.32		112.32
																	2	91	66.854		66.854
																	3	242.528	90.512		90.512
																	4	133.417	69.533		69.533
																	5	233.118	138.858		138.858
															T1T2-374 WT - C1 - Oct 26 2011098	1	1	363.167	135.381		135.381
															T1T2-374 WT - C1 - Oct 26 2011099	3	1	248.131	53.956		53.956
																	2	188.175	102.287		102.287
																	3	137.033	82.752		82.752
															T1T2-374 WT - C1 - Oct 26 2011100	4	1	190.948	52.686		52.686
																	2	560.143	57.439	60.239	117.678
																	3	216.28	63.131		63.131
																	4	202.148	100.701		100.701

## Sheet: morph2
HIGH-MAG IMAGES (60000x) - SYNAPSE MORPHOLOGY
	WT	HET	KO		Micrograph #	# Synapses	Spine Width	AZ length	(if split)	Total AZ length		Micrograph #	# Synapses	Spine Width	AZ length	(if split)	Total AZ length		Micrograph #	# Synapses	Spine Width	AZ length	(if split)	Total AZ length
Average (n=3):	#DIV/0!	#DIV/0!	#DIV/0!		WT:							HET:							KO:
S.E.M (n=3)	#DIV/0!	#DIV/0!	#DIV/0!
					T1T2-441 KO C6 - Oct 26 2011053	1
						2
						3
					T1T2-441 KO C6 - Oct 26 2011054
					T1T2-441 KO C6 - Oct 26 2011055
					T1T2-441 KO C6 - Oct 26 2011056
					T1T2-441 KO C6 - Oct 26 2011057	1	112.401	74.056		74.056
						2	72.45	64.511		64.511
					T1T2-441 KO C6 - Oct 26 2011058	1
						2
Other parameters (for future analysis)
PSD Area	PSD Area (if split)	Total PSD Area	# Docked SVs	# Undocked SVs	# Total SVs	Spine Area	Spine Perimeter	Circularity	Spine Feret's

## Sheet: morph3
HIGH-MAG IMAGES (60000x) - SYNAPSE MORPHOLOGY
	WT	HET	KO		Micrograph #	# Synapses	Spine Width	AZ length	(if split)	Total AZ length		Micrograph #	# Synapses	Spine Width	AZ length	(if split)	Total AZ length		Micrograph #	# Synapses	Spine Width	AZ length	(if split)	Total AZ length
Average (n=3):	#DIV/0!	#DIV/0!	#DIV/0!		WT:							HET:							KO:
S.E.M (n=3)	#DIV/0!	#DIV/0!	#DIV/0!
					T1T2-441 KO C6 - Oct 26 2011053	1
						2
						3
					T1T2-441 KO C6 - Oct 26 2011054
					T1T2-441 KO C6 - Oct 26 2011055
					T1T2-441 KO C6 - Oct 26 2011056
					T1T2-441 KO C6 - Oct 26 2011057	1	112.401	74.056		74.056
						2	72.45	64.511		64.511
					T1T2-441 KO C6 - Oct 26 2011058	1
						2
Other parameters (for future analysis)
PSD Area	PSD Area (if split)	Total PSD Area	# Docked SVs	# Undocked SVs	# Total SVs	Spine Area	Spine Perimeter	Circularity	Spine Feret's

## Sheet: DENSITY FINAL 
LOW-MAG IMAGES (30000x) - SYNAPSE DENSITY
				PER 100 um2
			WT	DHET	DKO
		Average (n=3):	22.9473	20.5312	16.6772			0.273241						WT:					HET:					KO:				WT:					HET:					KO:
		S.E.M (n=3)	1.99011	1.29157	0.844436
													24.9988	T1T2-374 WT - C1 - Oct 26 2011002	13	Local average			Oct 25 D1 - t1t376 het002	16	Local average		21.153	T1T2-441 KO C6 - Oct 26 2011002	11	Local average		2012.11.06 - Tabrez n4 Grid D8 - Sample 1_006	6	Local average	13.5434		2012.11.07 - Tabrez n4 Grid A1 - Sample 4_001	7	Local average			NEW SET 004	9	Local average		20.3151
													9.61494	T1T2-374 WT - C1 - Oct 26 2011003	5	15			Oct 25 D1 - t1t376 het003	9	12.54		15.384	T1T2-441 KO C6 - Oct 26 2011003	8	8.58824				8.97297			2012.11.07 - Tabrez n4 Grid A1 - Sample 4_002	5	8.97436			NEW SET 005	7	8.08696		15.8006
													21.1529	T1T2-374 WT - C1 - Oct 26 2011004	11	0.756439			Oct 25 D1 - t1t376 het004	8	0.443741		17.307	T1T2-441 KO C6 - Oct 26 2011004	9	0.39025		2012.11.06 - Tabrez n4 Grid D8 - Sample 1_008	13	0.449368	29.344		2012.11.07 - Tabrez n4 Grid A1 - Sample 4_003	5	0.485258			NEW SET 006	5	0.358238		11.2862
													36.5368	T1T2-374 WT - C1 - Oct 26 2011005	19				Oct 25 D1 - t1t376 het005	14			11.538	T1T2-441 KO C6 - Oct 26 2011005	6			2012.11.06 - Tabrez n4 Grid D8 - Sample 1_009	12		27.0868		2012.11.07 - Tabrez n4 Grid A1 - Sample 4_004	7				NEW SET 007	11			24.8296
													17.3069	T1T2-374 WT - C1 - Oct 26 2011006	9				Oct 25 D1 - t1t376 het006	17			13.461	T1T2-441 KO C6 - Oct 26 2011006	7			2012.11.06 - Tabrez n4 Grid D8 - Sample 1_010	8		18.0579		2012.11.07 - Tabrez n4 Grid A1 - Sample 4_005	12				NEW SET 008	12			27.0868
													15.3839	T1T2-374 WT - C1 - Oct 26 2011007	8				Oct 25 D1 - t1t376 het007	11			26.922	T1T2-441 KO C6 - Oct 26 2011007	14			2012.11.06 - Tabrez n4 Grid D8 - Sample 1_011	11		24.8296		2012.11.07 - Tabrez n4 Grid A1 - Sample 4_006	13				NEW SET 009	6			13.5434
													32.6908	T1T2-374 WT - C1 - Oct 26 2011008	17				Oct 25 D1 - t1t376 het008	15			26.922	T1T2-441 KO C6 - Oct 26 2011008	14			2012.11.06 - Tabrez n4 Grid D8 - Sample 1_012	8		18.0579		2012.11.07 - Tabrez n4 Grid A1 - Sample 4_007	6				NEW SET 010	8			18.0579
													13.4609	T1T2-374 WT - C1 - Oct 26 2011009	7				Oct 25 D1 - t1t376 het009	13			13.461	T1T2-441 KO C6 - Oct 26 2011009	7			2012.11.06 - Tabrez n4 Grid D8 - Sample 1_013	13		29.344		2012.11.07 - Tabrez n4 Grid A1 - Sample 4_008	13				NEW SET 011	9			20.3151
													32.6908	T1T2-374 WT - C1 - Oct 26 2011010	17				Oct 25 D1 - t1t376 het010	10			7.69201	T1T2-441 KO C6 - Oct 26 2011010	4			2012.11.06 - Tabrez n4 Grid D8 - Sample 1_014	6		13.5434		2012.11.07 - Tabrez n4 Grid A1 - Sample 4_009	13				NEW SET 012	5			11.2862
													24.9988	T1T2-374 WT - C1 - Oct 26 2011011	13				Oct 25 D1 - t1t376 het011	14			11.538	T1T2-441 KO C6 - Oct 26 2011011	6			2012.11.06 - Tabrez n4 Grid D8 - Sample 1_015	9		20.3151		2012.11.07 - Tabrez n4 Grid A1 - Sample 4_010	10				NEW SET 013	8			18.0579
													34.6138	T1T2-374 WT - C1 - Oct 26 2011012	18				Oct 25 D1 - t1t376 het012	9			17.307	T1T2-441 KO C6 - Oct 26 2011012	9			2012.11.06 - Tabrez n4 Grid D8 - Sample 1_016	5		11.2862		2012.11.07 - Tabrez n4 Grid A1 - Sample 4_011	7				NEW SET 014	8			18.0579
													38.4598	T1T2-374 WT - C1 - Oct 26 2011013	20				Oct 25 D1 - t1t376 het013	11			11.538	T1T2-441 KO C6 - Oct 26 2011013	6			2012.11.06 - Tabrez n4 Grid D8 - Sample 1_017	10		22.5723		2012.11.07 - Tabrez n4 Grid A1 - Sample 4_012	9				NEW SET 015	7			15.8006
													32.6908	T1T2-374 WT - C1 - Oct 26 2011014	17				Oct 25 D1 - t1t376 het014	12			11.538	T1T2-441 KO C6 - Oct 26 2011014	6			2012.11.06 - Tabrez n4 Grid D8 - Sample 1_018	8		18.0579		2012.11.07 - Tabrez n4 Grid A1 - Sample 4_013	6				NEW SET 016	10			22.5723
													24.9988	T1T2-374 WT - C1 - Oct 26 2011015	13				Oct 25 D1 - t1t376 het015	11			19.23	T1T2-441 KO C6 - Oct 26 2011015	10			2012.11.06 - Tabrez n4 Grid D8 - Sample 1_019	7		15.8006		2012.11.07 - Tabrez n4 Grid A1 - Sample 4_014	5				NEW SET 017	9			20.3151
													28.8448	T1T2-374 WT - C1 - Oct 26 2011016	15				Oct 25 D1 - t1t376 het016	13			15.384	T1T2-441 KO C6 - Oct 26 2011016	8			2012.11.06 - Tabrez n4 Grid D8 - Sample 1_020	9		20.3151		2012.11.07 - Tabrez n4 Grid A1 - Sample 4_015	9				NEW SET 018	12			27.0868
													9.61494	T1T2-374 WT - C1 - Oct 26 2011017	5				Oct 25 D1 - t1t376 het017	9			21.153	T1T2-441 KO C6 - Oct 26 2011017	11			2012.11.06 - Tabrez n4 Grid D8 - Sample 1_021	10		22.5723		2012.11.07 - Tabrez n4 Grid A1 - Sample 4_016	10				NEW SET 019	12			27.0868
													38.4598	T1T2-374 WT - C1 - Oct 26 2011018	20				Oct 25 D1 - t1t376 het018	16			15.384	T1T2-441 KO C6 - Oct 26 2011018	8			2012.11.06 - Tabrez n4 Grid D8 - Sample 1_022	9		20.3151		2012.11.07 - Tabrez n4 Grid A1 - Sample 4_017	13				NEW SET 020	6			13.5434
													30.7678	T1T2-374 WT - C1 - Oct 26 2011019	16				Oct 25 D1 - t1t376 het019	8			19.23	T1T2-441 KO C6 - Oct 26 2011019	10			2012.11.06 - Tabrez n4 Grid D8 - Sample 1_023	13		29.344		2012.11.07 - Tabrez n4 Grid A1 - Sample 4_018	11				NEW SET 021	9			20.3151
													38.4598	T1T2-374 WT - C1 - Oct 26 2011020	20				Oct 25 D1 - t1t376 het020	13			19.23	T1T2-441 KO C6 - Oct 26 2011020	10			2012.11.06 - Tabrez n4 Grid D8 - Sample 1_024	7		15.8006		2012.11.07 - Tabrez n4 Grid A1 - Sample 4_019	9				NEW SET 022	11			24.8296
	p-value WT vs. KO (n=3)												34.6138	T1T2-374 WT - C1 - Oct 26 2011021	18				Oct 25 D1 - t1t376 het021	14			9.61501	T1T2-441 KO C6 - Oct 26 2011021	5			2012.11.06 - Tabrez n4 Grid D8 - Sample 1_025	8		18.0579		2012.11.07 - Tabrez n4 Grid A1 - Sample 4_020	7				NEW SET 023	9			20.3151
	0.043494												24.9988	T1T2-374 WT - C1 - Oct 26 2011022	13				Oct 25 D1 - t1t376 het022	14			17.307	T1T2-441 KO C6 - Oct 26 2011022	9			2012.11.06 - Tabrez n4 Grid D8 - Sample 1_026	18		40.6302		2012.11.07 - Tabrez n4 Grid A1 - Sample 4_021	10				NEW SET 024	7			15.8006
													24.9988	T1T2-374 WT - C1 - Oct 26 2011023	13				Oct 25 D1 - t1t376 het023	17			24.999	T1T2-441 KO C6 - Oct 26 2011023	13			2012.11.06 - Tabrez n4 Grid D8 - Sample 1_027	10		22.5723		2012.11.07 - Tabrez n4 Grid A1 - Sample 4_022	4				NEW SET 025	11			24.8296
	p-value WT vs. HET (n=3)												24.9988	T1T2-374 WT - C1 - Oct 26 2011024	13				Oct 25 D1 - t1t376 het024	8			13.461	T1T2-441 KO C6 - Oct 26 2011024	7			2012.11.06 - Tabrez n4 Grid D8 - Sample 1_028	8		18.0579		2012.11.07 - Tabrez n4 Grid A1 - Sample 4_023	13				NEW SET 026	6			13.5434
	0.353958												32.6908	T1T2-374 WT - C1 - Oct 26 2011025	17				Oct 25 D1 - t1t376 het025	9			17.307	T1T2-441 KO C6 - Oct 26 2011025	9			2012.11.06 - Tabrez n4 Grid D8 - Sample 1_029	5		11.2862		2012.11.07 - Tabrez n4 Grid A1 - Sample 4_024	7				NEW SET 027	9			20.3151
													26.9218	T1T2-374 WT - C1 - Oct 26 2011026	14				Oct 25 D1 - t1t376 het026	16			19.23	T1T2-441 KO C6 - Oct 26 2011026	10			2012.11.06 - Tabrez n4 Grid D8 - Sample 1_030	7		15.8006		2012.11.07 - Tabrez n4 Grid A1 - Sample 4_025	8				NEW SET 028	8			18.0579
	p-value HET vs. KO (n=3)												17.3069	T1T2-374 WT - C1 - Oct 26 2011027	9				Oct 25 D1 - t1t376 het027	17			21.153	T1T2-441 KO C6 - Oct 26 2011027	11			2012.11.06 - Tabrez n4 Grid D8 - Sample 1_031	8		18.0579		2012.11.07 - Tabrez n4 Grid A1 - Sample 4_026	18				NEW SET 029	2			4.51447
	0.0530777												38.4598	T1T2-374 WT - C1 - Oct 26 2011028	20				Oct 25 D1 - t1t376 het028	10			17.307	T1T2-441 KO C6 - Oct 26 2011028	9			2012.11.06 - Tabrez n4 Grid D8 - Sample 1_032	8		18.0579		2012.11.07 - Tabrez n4 Grid A1 - Sample 4_027	10				NEW SET 030	8			18.0579
													32.6908	T1T2-374 WT - C1 - Oct 26 2011029	17				Oct 25 D1 - t1t376 het029	14			13.461	T1T2-441 KO C6 - Oct 26 2011029	7			2012.11.06 - Tabrez n4 Grid D8 - Sample 1_033	11		24.8296		2012.11.07 - Tabrez n4 Grid A1 - Sample 4_028	8				NEW SET 031	9			20.3151
Per 100 um2	WT	WT	WT	WT	HET	HET	HET	HET	DKO	DKO	DKO	DKO	36.5368	T1T2-374 WT - C1 - Oct 26 2011030	19				Oct 25 D1 - t1t376 het030	12			11.538	T1T2-441 KO C6 - Oct 26 2011030	6			2012.11.06 - Tabrez n4 Grid D8 - Sample 1_034	9		20.3151		2012.11.07 - Tabrez n4 Grid A1 - Sample 4_029	5				NEW SET 032	7			15.8006
	28.8448	21.7682	20.9221	20.2539	24.1143	17.9741	19.7793	20.2571	16.5151	14.3818	17.5577	18.254	24.9988	T1T2-374 WT - C1 - Oct 26 2011031	13				Oct 25 D1 - t1t376 het031	5			13.461	T1T2-441 KO C6 - Oct 26 2011031	7			2012.11.06 - Tabrez n4 Grid D8 - Sample 1_035	10		22.5723		2012.11.07 - Tabrez n4 Grid A1 - Sample 4_030	7				NEW SET 033	12			27.0868
	1.45462	0.939566	0.905536	1.01432	0.853309	0.749297	0.812611	1.09533	0.750447	0.610982	0.820318	0.808621	28.8448	T1T2-374 WT - C1 - Oct 26 2011032	15				Oct 25 D1 - t1t376 het032	9			15.384	T1T2-441 KO C6 - Oct 26 2011032	8			2012.11.06 - Tabrez n4 Grid D8 - Sample 1_036	6		13.5434		2012.11.07 - Tabrez n4 Grid A1 - Sample 4_031	8				NEW SET 034	8			18.0579
													32.6908	T1T2-374 WT - C1 - Oct 26 2011033	17				Oct 25 D1 - t1t376 het033	10			17.307	T1T2-441 KO C6 - Oct 26 2011033	9			2012.11.06 - Tabrez n4 Grid D8 - Sample 1_037	12		27.0868		2012.11.07 - Tabrez n4 Grid A1 - Sample 4_032	8				NEW SET 035	13			29.344
Synapses/100 um2	28.8448	21.7682	20.9221	20.2539	24.1143	17.9741	19.7793	20.2571	16.5151	14.3818	17.5577	18.254	23.0759	T1T2-374 WT - C1 - Oct 26 2011034	12				Oct 25 D1 - t1t376 het034	11			15.384	T1T2-441 KO C6 - Oct 26 2011034	8						0		2012.11.07 - Tabrez n4 Grid A1 - Sample 4_033	11				NEW SET 036	5			11.2862
	1.45462	0.939566	0.905536	1.01432	0.853309	0.749297	0.812611	1.09533	0.750447	0.610982	0.820318	0.808621	46.1517	T1T2-374 WT - C1 - Oct 26 2011035	24				Oct 25 D1 - t1t376 het035	13			7.69201	T1T2-441 KO C6 - Oct 26 2011035	4			2012.11.06 - Tabrez n4 Grid D8 - Sample 1_039	7		15.8006		2012.11.07 - Tabrez n4 Grid A1 - Sample 4_034	9				NEW SET 037	12			27.0868
Micrograph area (um2)	52.0024	52.0024	52.0024	44.3023	52.0024	52.0024	52.0024	44.3023	52.0024	52.0024	52.0024	44.3023	24.9988	T1T2-374 WT - C1 - Oct 26 2011036	13				Oct 25 D1 - t1t376 het036	15			13.461	T1T2-441 KO C6 - Oct 26 2011036	7			2012.11.06 - Tabrez n4 Grid D8 - Sample 1_040	8		18.0579		2012.11.07 - Tabrez n4 Grid A1 - Sample 4_035	10				NEW SET 038	8			18.0579
													32.6908	T1T2-374 WT - C1 - Oct 26 2011037	17				Oct 25 D1 - t1t376 het037	15			15.384	T1T2-441 KO C6 - Oct 26 2011037	8			2012.11.06 - Tabrez n4 Grid D8 - Sample 1_041	12		27.0868		2012.11.07 - Tabrez n4 Grid A1 - Sample 4_036	6				NEW SET 039	10			22.5723
Micrograph area (nm2)	5.20024e+07	5.20024e+07	5.20024e+07	44302336	5.20024e+07	5.20024e+07	5.20024e+07	44302336	5.20024e+07	5.20024e+07	5.20024e+07	44302336	48.0747	T1T2-374 WT - C1 - Oct 26 2011038	25				Oct 25 D1 - t1t376 het038	16			11.538	T1T2-441 KO C6 - Oct 26 2011038	6			2012.11.06 - Tabrez n4 Grid D8 - Sample 1_042	8		18.0579		2012.11.07 - Tabrez n4 Grid A1 - Sample 4_037	12				NEW SET 040	6			13.5434
													23.0759	T1T2-374 WT - C1 - Oct 26 2011039	12				Oct 25 D1 - t1t376 het039	13			19.23	T1T2-441 KO C6 - Oct 26 2011039	10			2012.11.06 - Tabrez n4 Grid D8 - Sample 1_043	8		18.0579		2012.11.07 - Tabrez n4 Grid A1 - Sample 4_038	7				NEW SET 041	6			13.5434
nm/pixel	7.04225	7.04225	7.04225	6.5	7.04225	7.04225	7.04225	6.5	7.04225	7.04225	7.04225	6.5	40.3828	T1T2-374 WT - C1 - Oct 26 2011040	21				Oct 25 D1 - t1t376 het040	13			30.768	T1T2-441 KO C6 - Oct 26 2011040	16			2012.11.06 - Tabrez n4 Grid D8 - Sample 1_044	5		11.2862		2012.11.07 - Tabrez n4 Grid A1 - Sample 4_039	12				NEW SET 042	8			18.0579
													0						Oct 25 D1 - t1t376 het041	8			28.845	T1T2-441 KO C6 - Oct 26 2011041	15													NEW SET 043	8			18.0579
Micrograph Y:	1024	1024	1024	1024	1024	1024	1024	1024	1024	1024	1024	1024	23.0759	T1T373 WT - oct 18 2011002	12	Local average			Oct 25 D1 - t1t376 het042	10			21.153	T1T2-441 KO C6 - Oct 26 2011042	11													NEW SET 044	7			15.8006
Micrograph X:	1024	1024	1024	1024	1024	1024	1024	1024	1024	1024	1024	1024	28.8448	T1T373 WT - oct 18 2011003	15	11.32			Oct 25 D1 - t1t376 het043	11			15.384	T1T2-441 KO C6 - Oct 26 2011043	8													NEW SET 045	6			13.5434
													19.2299	T1T373 WT - oct 18 2011004	10	0.488596			Oct 25 D1 - t1t376 het044	13			23.076	T1T2-441 KO C6 - Oct 26 2011044	12													NEW SET 046	7			15.8006
	WT	WT	WT	WT	HET	HET	HET	HET	DKO	DKO	DKO	DKO	19.2299	T1T373 WT - oct 18 2011005	10				Oct 25 D1 - t1t376 het045	12			17.307	T1T2-441 KO C6 - Oct 26 2011045	9													NEW SET 047	4			9.02894
Per micrograph	15	11.32	10.88	8.97297	12.54	9.34694	10.2857	8.97436	8.58824	7.47887	9.13043	8.08696	15.3839	T1T373 WT - oct 18 2011006	8				Oct 25 D1 - t1t376 het046	10			5.76901	T1T2-441 KO C6 - Oct 26 2011046	3													NEW SET 048	7			15.8006
	0.756439	0.488596	0.4709	0.449368	0.443741	0.389653	0.422577	0.485258	0.39025	0.317725	0.426585	0.358238	15.3839	T1T373 WT - oct 18 2011007	8				Oct 25 D1 - t1t376 het047	16			13.461	T1T2-441 KO C6 - Oct 26 2011047	7													NEW SET 049	5			11.2862
													17.3069	T1T373 WT - oct 18 2011008	9				Oct 25 D1 - t1t376 het048	16			17.307	T1T2-441 KO C6 - Oct 26 2011048	9
		PER MICROGRAPH											21.1529	T1T373 WT - oct 18 2011009	11				Oct 25 D1 - t1t376 het049	15			13.461	T1T2-441 KO C6 - Oct 26 2011049	7
	WT	DHET	DKO										23.0759	T1T373 WT - oct 18 2011010	12				Oct 25 D1 - t1t376 het050	16			21.153	T1T2-441 KO C6 - Oct 26 2011050	11
Average (n=3):	11.5432	10.2868	8.32112	0.279135									23.0759	T1T373 WT - oct 18 2011011	12				Oct 25 D1 - t1t376 het051	20			15.384	T1T2-441 KO C6 - Oct 26 2011051	8
S.E.M (n=3)	1.30619	0.947475	0.486045										15.3839	T1T373 WT - oct 18 2011012	8								9.61501	T1T2-441 KO C6 - Oct 26 2011052	5
													15.3839	T1T373 WT - oct 18 2011013	8				T1T2-448 het D6 - Oct 26 2011002	5	Local average
													13.4609	T1T373 WT - oct 18 2011014	7				T1T2-448 het D6 - Oct 26 2011003	11	9.34694		21.153	T1T2 495 - B1 - Dec1 2011001	11	Local average
													23.0759	T1T373 WT - oct 18 2011015	12				T1T2-448 het D6 - Oct 26 2011004	10	0.389653		21.153	T1T2 495 - B1 - Dec1 2011002	11	7.47887
													26.9218	T1T373 WT - oct 18 2011016	14				T1T2-448 het D6 - Oct 26 2011005	12			17.307	T1T2 495 - B1 - Dec1 2011003	9	0.317725
													26.9218	T1T373 WT - oct 18 2011017	14				T1T2-448 het D6 - Oct 26 2011006	4			21.153	T1T2 495 - B1 - Dec1 2011004	11
													34.6138	T1T373 WT - oct 18 2011018	18				T1T2-448 het D6 - Oct 26 2011007	9			15.384	T1T2 495 - B1 - Dec1 2011005	8
													19.2299	T1T373 WT - oct 18 2011019	10				T1T2-448 het D6 - Oct 26 2011008	7			13.461	T1T2 495 - B1 - Dec1 2011006	7
													19.2299	T1T373 WT - oct 18 2011020	10				T1T2-448 het D6 - Oct 26 2011009	10			7.69201	T1T2 495 - B1 - Dec1 2011007	4
													19.2299	T1T373 WT - oct 18 2011021	10				T1T2-448 het D6 - Oct 26 2011010	9			15.384	T1T2 495 - B1 - Dec1 2011008	8
													11.5379	T1T373 WT - oct 18 2011022	6				T1T2-448 het D6 - Oct 26 2011011	12			23.076	T1T2 495 - B1 - Dec1 2011009	12
													24.9988	T1T373 WT - oct 18 2011023	13				T1T2-448 het D6 - Oct 26 2011012	8			17.307	T1T2 495 - B1 - Dec1 2011010	9
	WT	DHET	DKO										21.1529	T1T373 WT - oct 18 2011024	11				T1T2-448 het D6 - Oct 26 2011013	11			5.76901	T1T2 495 - B1 - Dec1 2011011	3
Net Average:	12.2245	10.7365	8.37173										13.4609	T1T373 WT - oct 18 2011025	7				T1T2-448 het D6 - Oct 26 2011014	7			11.538	T1T2 495 - B1 - Dec1 2011012	6
S.E.M:	0.346151	0.264905	0.225332										17.3069	T1T373 WT - oct 18 2011026	9				T1T2-448 het D6 - Oct 26 2011015	10			15.384	T1T2 495 - B1 - Dec1 2011013	8
			0.684832										36.5368	T1T373 WT - oct 18 2011027	19				T1T2-448 het D6 - Oct 26 2011016	12			21.153	T1T2 495 - B1 - Dec1 2011014	11
N (mice):	3	3	3		9								24.9988	T1T373 WT - oct 18 2011028	13				T1T2-448 het D6 - Oct 26 2011017	12			11.538	T1T2 495 - B1 - Dec1 2011015	6
N (pictures):	147	148	191		486								13.4609	T1T373 WT - oct 18 2011029	7				T1T2-448 het D6 - Oct 26 2011018	10			11.538	T1T2 495 - B1 - Dec1 2011016	6
N (synapses):	1797	1589	1599		4985								28.8448	T1T373 WT - oct 18 2011030	15				T1T2-448 het D6 - Oct 26 2011019	13			7.69201	T1T2 495 - B1 - Dec1 2011017	4
													32.6908	T1T373 WT - oct 18 2011031	17				T1T2-448 het D6 - Oct 26 2011020	6			5.76901	T1T2 495 - B1 - Dec1 2011018	3
													21.1529	T1T373 WT - oct 18 2011032	11				T1T2-448 het D6 - Oct 26 2011021	11			13.461	T1T2 495 - B1 - Dec1 2011019	7
													17.3069	T1T373 WT - oct 18 2011033	9				T1T2-448 het D6 - Oct 26 2011022	5			13.461	T1T2 495 - B1 - Dec1 2011020	7
													23.0759	T1T373 WT - oct 18 2011034	12				T1T2-448 het D6 - Oct 26 2011023	11			23.076	T1T2 495 - B1 - Dec1 2011021	12
													15.3839	T1T373 WT - oct 18 2011035	8				T1T2-448 het D6 - Oct 26 2011024	15			17.307	T1T2 495 - B1 - Dec1 2011022	9
													17.3069	T1T373 WT - oct 18 2011036	9				T1T2-448 het D6 - Oct 26 2011025	7			15.384	T1T2 495 - B1 - Dec1 2011023	8
													13.4609	T1T373 WT - oct 18 2011037	7				T1T2-448 het D6 - Oct 26 2011026	9			13.461	T1T2 495 - B1 - Dec1 2011024	7
													13.4609	T1T373 WT - oct 18 2011038	7				T1T2-448 het D6 - Oct 26 2011027	13			11.538	T1T2 495 - B1 - Dec1 2011025	6
													19.2299	T1T373 WT - oct 18 2011039	10				T1T2-448 het D6 - Oct 26 2011028	6			11.538	T1T2 495 - B1 - Dec1 2011026	6
													40.3828	T1T373 WT - oct 18 2011040	21				T1T2-448 het D6 - Oct 26 2011029	9			11.538	T1T2 495 - B1 - Dec1 2011027	6
													24.9988	T1T373 WT - oct 18 2011041	13				T1T2-448 het D6 - Oct 26 2011030	10			11.538	T1T2 495 - B1 - Dec1 2011028	6
													17.3069	T1T373 WT - oct 18 2011042	9				T1T2-448 het D6 - Oct 26 2011031	9			15.384	T1T2 495 - B1 - Dec1 2011029	8
													26.9218	T1T373 WT - oct 18 2011043	14				T1T2-448 het D6 - Oct 26 2011032	5			7.69201	T1T2 495 - B1 - Dec1 2011030	4
													19.2299	T1T373 WT - oct 18 2011044	10				T1T2-448 het D6 - Oct 26 2011033	8			15.384	T1T2 495 - B1 - Dec1 2011031	8
													30.7678	T1T373 WT - oct 18 2011045	16				T1T2-448 het D6 - Oct 26 2011034	11			21.153	T1T2 495 - B1 - Dec1 2011032	11
													13.4609	T1T373 WT - oct 18 2011046	7				T1T2-448 het D6 - Oct 26 2011035	7			11.538	T1T2 495 - B1 - Dec1 2011033	6
													30.7678	T1T373 WT - oct 18 2011047	16				T1T2-448 het D6 - Oct 26 2011036	10			17.307	T1T2 495 - B1 - Dec1 2011034	9
													26.9218	T1T373 WT - oct 18 2011048	14				T1T2-448 het D6 - Oct 26 2011037	7			7.69201	T1T2 495 - B1 - Dec1 2011035	4
													26.9218	T1T373 WT - oct 18 2011049	14				T1T2-448 het D6 - Oct 26 2011038	11			15.384	T1T2 495 - B1 - Dec1 2011036	8
													24.9988	T1T373 WT - oct 18 2011050	13				T1T2-448 het D6 - Oct 26 2011039	9			11.538	T1T2 495 - B1 - Dec1 2011037	6
													21.1529	T1T373 WT - oct 18 2011051	11				T1T2-448 het D6 - Oct 26 2011040	10			11.538	T1T2 495 - B1 - Dec1 2011038	6
													0						T1T2-448 het D6 - Oct 26 2011041	12			9.61501	T1T2 495 - B1 - Dec1 2011039	5
													30.7678	T1T2-457 WT E8 Nov 9 2011001	16	Local average			T1T2-448 het D6 - Oct 26 2011042	12			5.76901	T1T2 495 - B1 - Dec1 2011040	3
													19.2299	T1T2-457 WT E8 Nov 9 2011002	10	10.88			T1T2-448 het D6 - Oct 26 2011043	5			9.61501	T1T2 495 - B1 - Dec1 2011041	5
													19.2299	T1T2-457 WT E8 Nov 9 2011003	10	0.4709			T1T2-448 het D6 - Oct 26 2011044	11			15.384	T1T2 495 - B1 - Dec1 2011042	8
													15.3839	T1T2-457 WT E8 Nov 9 2011004	8				T1T2-448 het D6 - Oct 26 2011045	4			21.153	T1T2 495 - B1 - Dec1 2011043	11
													28.8448	T1T2-457 WT E8 Nov 9 2011005	15				T1T2-448 het D6 - Oct 26 2011046	6			15.384	T1T2 495 - B1 - Dec1 2011044	8
													15.3839	T1T2-457 WT E8 Nov 9 2011006	8				T1T2-448 het D6 - Oct 26 2011047	14			17.307	T1T2 495 - B1 - Dec1 2011045	9
													24.9988	T1T2-457 WT E8 Nov 9 2011007	13				T1T2-448 het D6 - Oct 26 2011048	12			15.384	T1T2 495 - B1 - Dec1 2011046	8
													15.3839	T1T2-457 WT E8 Nov 9 2011008	8				T1T2-448 het D6 - Oct 26 2011049	12			17.307	T1T2 495 - B1 - Dec1 2011047	9
													15.3839	T1T2-457 WT E8 Nov 9 2011009	8				T1T2-448 het D6 - Oct 26 2011050				13.461	T1T2 495 - B1 - Dec1 2011048	7
													13.4609	T1T2-457 WT E8 Nov 9 2011010	7				T1T2-448 het D6 - Oct 26 2011051	9			11.538	T1T2 495 - B1 - Dec1 2011049	6
													26.9218	T1T2-457 WT E8 Nov 9 2011011	14								9.61501	T1T2 495 - B1 - Dec1 2011050	5
													23.0759	T1T2-457 WT E8 Nov 9 2011012	12				T1T2 - 440 HET B6 Nov 3 2011004	10	Local average		15.384	T1T2 495 - B1 - Dec1 2011051	8
													26.9218	T1T2-457 WT E8 Nov 9 2011013	14				T1T2 - 440 HET B6 Nov 3 2011005	9	10.2857		26.922	T1T2 495 - B1 - Dec1 2011052	14
													23.0759	T1T2-457 WT E8 Nov 9 2011014	12				T1T2 - 440 HET B6 Nov 3 2011006	13	0.422577		21.153	T1T2 495 - B1 - Dec1 2011053	11
													15.3839	T1T2-457 WT E8 Nov 9 2011015	8				T1T2 - 440 HET B6 Nov 3 2011007	12			5.76901	T1T2 495 - B1 - Dec1 2011054	3
													11.5379	T1T2-457 WT E8 Nov 9 2011016	6				T1T2 - 440 HET B6 Nov 3 2011008	10			26.922	T1T2 495 - B1 - Dec1 2011055	14
													26.9218	T1T2-457 WT E8 Nov 9 2011017	14				T1T2 - 440 HET B6 Nov 3 2011009	4			19.23	T1T2 495 - B1 - Dec1 2011056	10
													23.0759	T1T2-457 WT E8 Nov 9 2011018	12				T1T2 - 440 HET B6 Nov 3 2011010	7			13.461	T1T2 495 - B1 - Dec1 2011057	7
													13.4609	T1T2-457 WT E8 Nov 9 2011019	7				T1T2 - 440 HET B6 Nov 3 2011011	12			21.153	T1T2 495 - B1 - Dec1 2011058	11
													13.4609	T1T2-457 WT E8 Nov 9 2011020	7				T1T2 - 440 HET B6 Nov 3 2011012	7			13.461	T1T2 495 - B1 - Dec1 2011059	7
													21.1529	T1T2-457 WT E8 Nov 9 2011021	11				T1T2 - 440 HET B6 Nov 3 2011013	9			3.84601	T1T2 495 - B1 - Dec1 2011060	2
													15.3839	T1T2-457 WT E8 Nov 9 2011022	8				T1T2 - 440 HET B6 Nov 3 2011014	14			17.307	T1T2 495 - B1 - Dec1 2011061	9
													9.61494	T1T2-457 WT E8 Nov 9 2011023	5				T1T2 - 440 HET B6 Nov 3 2011015	12			17.307	T1T2 495 - B1 - Dec1 2011062	9
													15.3839	T1T2-457 WT E8 Nov 9 2011024	8				T1T2 - 440 HET B6 Nov 3 2011016	12			7.69201	T1T2 495 - B1 - Dec1 2011063	4
													9.61494	T1T2-457 WT E8 Nov 9 2011025	5				T1T2 - 440 HET B6 Nov 3 2011017	11			11.538	T1T2 495 - B1 - Dec1 2011064	6
													17.3069	T1T2-457 WT E8 Nov 9 2011026	9				T1T2 - 440 HET B6 Nov 3 2011018	7			17.307	T1T2 495 - B1 - Dec1 2011065	9
													17.3069	T1T2-457 WT E8 Nov 9 2011027	9				T1T2 - 440 HET B6 Nov 3 2011019	10			9.61501	T1T2 495 - B1 - Dec1 2011066	5
													23.0759	T1T2-457 WT E8 Nov 9 2011028	12				T1T2 - 440 HET B6 Nov 3 2011020	6			15.384	T1T2 495 - B1 - Dec1 2011067	8
													34.6138	T1T2-457 WT E8 Nov 9 2011029	18				T1T2 - 440 HET B6 Nov 3 2011021	7			17.307	T1T2 495 - B1 - Dec1 2011068	9
													17.3069	T1T2-457 WT E8 Nov 9 2011030	9				T1T2 - 440 HET B6 Nov 3 2011022	8			11.538	T1T2 495 - B1 - Dec1 2011069	6
													26.9218	T1T2-457 WT E8 Nov 9 2011031	14				T1T2 - 440 HET B6 Nov 3 2011023	7			19.23	T1T2 495 - B1 - Dec1 2011070	10
													26.9218	T1T2-457 WT E8 Nov 9 2011032	14				T1T2 - 440 HET B6 Nov 3 2011024	10			7.69201	T1T2 495 - B1 - Dec1 2011071	4
													21.1529	T1T2-457 WT E8 Nov 9 2011033	11				T1T2 - 440 HET B6 Nov 3 2011025	13
													17.3069	T1T2-457 WT E8 Nov 9 2011034	9				T1T2 - 440 HET B6 Nov 3 2011026	16			15.384	T1T2 497 - C1 - Dec1 2011001	8	Local average
													26.9218	T1T2-457 WT E8 Nov 9 2011035	14				T1T2 - 440 HET B6 Nov 3 2011027	10			21.153	T1T2 497 - C1 - Dec1 2011002	11	9.13043
													13.4609	T1T2-457 WT E8 Nov 9 2011036	7				T1T2 - 440 HET B6 Nov 3 2011028	12			19.23	T1T2 497 - C1 - Dec1 2011003	10	0.426585
													15.3839	T1T2-457 WT E8 Nov 9 2011037	8				T1T2 - 440 HET B6 Nov 3 2011029	9			19.23	T1T2 497 - C1 - Dec1 2011004	10
													23.0759	T1T2-457 WT E8 Nov 9 2011038	12				T1T2 - 440 HET B6 Nov 3 2011030	13			11.538	T1T2 497 - C1 - Dec1 2011005	6
													30.7678	T1T2-457 WT E8 Nov 9 2011039	16				T1T2 - 440 HET B6 Nov 3 2011031	11			24.999	T1T2 497 - C1 - Dec1 2011006	13
													24.9988	T1T2-457 WT E8 Nov 9 2011040	13				T1T2 - 440 HET B6 Nov 3 2011032	11			23.076	T1T2 497 - C1 - Dec1 2011007	12
													24.9988	T1T2-457 WT E8 Nov 9 2011041	13				T1T2 - 440 HET B6 Nov 3 2011033	16			19.23	T1T2 497 - C1 - Dec1 2011008	10
													30.7678	T1T2-457 WT E8 Nov 9 2011042	16				T1T2 - 440 HET B6 Nov 3 2011034	11			23.076	T1T2 497 - C1 - Dec1 2011009	12
													17.3069	T1T2-457 WT E8 Nov 9 2011043	9				T1T2 - 440 HET B6 Nov 3 2011035	9			23.076	T1T2 497 - C1 - Dec1 2011010	12
													21.1529	T1T2-457 WT E8 Nov 9 2011044	11				T1T2 - 440 HET B6 Nov 3 2011036	5			26.922	T1T2 497 - C1 - Dec1 2011011	14
													26.9218	T1T2-457 WT E8 Nov 9 2011045	14				T1T2 - 440 HET B6 Nov 3 2011037	8			21.153	T1T2 497 - C1 - Dec1 2011012	11
													26.9218	T1T2-457 WT E8 Nov 9 2011046	14				T1T2 - 440 HET B6 Nov 3 2011038	13			30.768	T1T2 497 - C1 - Dec1 2011013	16
													30.7678	T1T2-457 WT E8 Nov 9 2011047	16				T1T2 - 440 HET B6 Nov 3 2011039	13			23.076	T1T2 497 - C1 - Dec1 2011014	12
													26.9218	T1T2-457 WT E8 Nov 9 2011048	14				T1T2 - 440 HET B6 Nov 3 2011040	14			19.23	T1T2 497 - C1 - Dec1 2011015	10
													19.2299	T1T2-457 WT E8 Nov 9 2011049	10				T1T2 - 440 HET B6 Nov 3 2011041	9			17.307	T1T2 497 - C1 - Dec1 2011016	9
													11.5379	T1T2-457 WT E8 Nov 9 2011050	6				T1T2 - 440 HET B6 Nov 3 2011042	9			15.384	T1T2 497 - C1 - Dec1 2011017	8
													19.2299	T1T2-457 WT E8 Nov 9 2011051	10				T1T2 - 440 HET B6 Nov 3 2011043	14			7.69201	T1T2 497 - C1 - Dec1 2011018	4
													24.9988	T1T2-457 WT E8 Nov 9 2011052	13				T1T2 - 440 HET B6 Nov 3 2011044	11			13.461	T1T2 497 - C1 - Dec1 2011019	7
													24.9988	T1T2-457 WT E8 Nov 9 2011053	13				T1T2 - 440 HET B6 Nov 3 2011045	5			23.076	T1T2 497 - C1 - Dec1 2011020	12
													24.9988	T1T2-457 WT E8 Nov 9 2011054	13				T1T2 - 440 HET B6 Nov 3 2011046	15			19.23	T1T2 497 - C1 - Dec1 2011021	10
													26.9218	T1T2-457 WT E8 Nov 9 2011055	14				T1T2 - 440 HET B6 Nov 3 2011047	7			21.153	T1T2 497 - C1 - Dec1 2011022	11
													13.4609	T1T2-457 WT E8 Nov 9 2011056	7				T1T2 - 440 HET B6 Nov 3 2011048	13			15.384	T1T2 497 - C1 - Dec1 2011023	8
													44.2287	T1T2-457 WT E8 Nov 9 2011057	23				T1T2 - 440 HET B6 Nov 3 2011049	14			9.61501	T1T2 497 - C1 - Dec1 2011024	5
													17.3069	T1T2-457 WT E8 Nov 9 2011058	9				T1T2 - 440 HET B6 Nov 3 2011050	8			9.61501	T1T2 497 - C1 - Dec1 2011025	5
																			T1T2 - 440 HET B6 Nov 3 2011051	11			15.384	T1T2 497 - C1 - Dec1 2011026	8
																			T1T2 - 440 HET B6 Nov 3 2011052	7			17.307	T1T2 497 - C1 - Dec1 2011027	9
																							13.461	T1T2 497 - C1 - Dec1 2011028	7
																							15.384	T1T2 497 - C1 - Dec1 2011029	8
																							13.461	T1T2 497 - C1 - Dec1 2011030	7
																							30.768	T1T2 497 - C1 - Dec1 2011031	16
																							21.153	T1T2 497 - C1 - Dec1 2011032	11
																							11.538	T1T2 497 - C1 - Dec1 2011033	6
																							17.307	T1T2 497 - C1 - Dec1 2011034	9
																							11.538	T1T2 497 - C1 - Dec1 2011035	6
																							5.76901	T1T2 497 - C1 - Dec1 2011036	3
																							19.23	T1T2 497 - C1 - Dec1 2011037	10
																							3.84601	T1T2 497 - C1 - Dec1 2011038	2
																							5.76901	T1T2 497 - C1 - Dec1 2011039	3
																							7.69201	T1T2 497 - C1 - Dec1 2011040	4
																							21.153	T1T2 497 - C1 - Dec1 2011041	11
																							13.461	T1T2 497 - C1 - Dec1 2011042	7
																							15.384	T1T2 497 - C1 - Dec1 2011043	8
																							26.922	T1T2 497 - C1 - Dec1 2011044	14
																							21.153	T1T2 497 - C1 - Dec1 2011045	11
																							21.153	T1T2 497 - C1 - Dec1 2011046	11
																							19.23	T1T2 497 - C1 - Dec1 2011047	10
																							15.384	T1T2 497 - C1 - Dec1 2011048	8
																							13.461	T1T2 497 - C1 - Dec1 2011049	7
																							17.307	T1T2 497 - C1 - Dec1 2011050	9
																							32.6911	T1T2 497 - C1 - Dec1 2011051	17
																							19.23	T1T2 497 - C1 - Dec1 2011052	10
																							11.538	T1T2 497 - C1 - Dec1 2011053	6
																							21.153	T1T2 497 - C1 - Dec1 2011054	11
																							7.69201	T1T2 497 - C1 - Dec1 2011055	4
																							3.84601	T1T2 497 - C1 - Dec1 2011056	2
																							17.307	T1T2 497 - C1 - Dec1 2011057	9
																							17.307	T1T2 497 - C1 - Dec1 2011058	9
																							17.307	T1T2 497 - C1 - Dec1 2011059	9
																							32.6911	T1T2 497 - C1 - Dec1 2011060	17
																							36.5371	T1T2 497 - C1 - Dec1 2011061	19
																							13.461	T1T2 497 - C1 - Dec1 2011062	7
																							23.076	T1T2 497 - C1 - Dec1 2011063	12
																							11.538	T1T2 497 - C1 - Dec1 2011064	6
																							13.461	T1T2 497 - C1 - Dec1 2011065	7
																							13.461	T1T2 497 - C1 - Dec1 2011066	7
																							13.461	T1T2 497 - C1 - Dec1 2011067	7
																							21.153	T1T2 497 - C1 - Dec1 2011068	11
																							17.307	T1T2 497 - C1 - Dec1 2011069	9

## Sheet: MORPHOLOGY FINAL
															MICROGRAPH	Number	Synapse	Spine Width (in pixels)				MICROGRAPH	Number	Synapse	Spine Width (in pixels)						MICROGRAPH	Number	Synapse	Spine Width (in pixels)
															T1T2-457 WT E8 Nov 9 2011059	2	1	156.272				Oct 25 D1 - t1t376 het053	2	1	289.171						T1T2 495 - B1 - Dec1 2011072	3	1	113.437
																	2	212.96						2	XXXXXX								2	190.56
																																	3	110.218
															T1T2-457 WT E8 Nov 9 2011060	2	1	175.354				Oct 25 D1 - t1t376 het054	4	1	212.85
																	2	136.821						2	111.158						T1T2 495 - B1 - Dec1 2011073	3	1	105.561
																								3	196.54								2	351.216
															T1T2-457 WT E8 Nov 9 2011061	1	1	177.133						4	199.402								3	253.18
															T1T2-457 WT E8 Nov 9 2011062	2	1	168.808				Oct 25 D1 - t1t376 het055	3	1	136.004						T1T2 495 - B1 - Dec1 2011074	1	1	211.896	44.688
Spine Width (nm)																	2	XXXXXX						2		48.177
	WT	WT	WT	WT	HET	HET	HET	HET	DKO	DKO	DKO	DKO												3	80.056						T1T2 495 - B1 - Dec1 2011075	2	1	74.673
	620.728	606.481	589.753	554.019	592.425	610.639	648.894	569.113	580.444	664.817	596.536	591.211			T1T2-457 WT E8 Nov 9 2011063	4	1	124.615															2	157.851
																	2	188.322				Oct 25 D1 - t1t376 het056	1	1	157.61
Spine WIdth (pixels)																	3	103.247													T1T2 495 - B1 - Dec1 2011076	2	1	93.536
	WT	WT	WT	WT	HET	HET	HET	HET	DKO	DKO	DKO	DKO					4	143.126				Oct 25 D1 - t1t376 het057	4	1	168.68								2	121.495
	177.554	173.479	168.694	85.2337	169.458	174.668	185.61	87.5558	166.031	190.165	170.634	90.9555												2	147.557
															T1T2-457 WT E8 Nov 9 2011064	5	1	154.029						3	344.308						T1T2 495 - B1 - Dec1 2011077	2	1	277.218
																	2	143.402						4	257.597								2	305.712	96.356
																	3	XXXXXX
																	4	111.79				Oct 25 D1 - t1t376 het058	4	1	222.928						T1T2 495 - B1 - Dec1 2011078	3	1	134.792
																	5	XXXXXX						2	103.019								2	268.881
																								3	76.059								3	126.052
															T1T2-457 WT E8 Nov 9 2011065	4	1	199.462						4	224.083
																	2	118.533													T1T2 495 - B1 - Dec1 2011079	3	1	108.724
																	3	148.03				Oct 25 D1 - t1t376 het059	5	1	152.003								2	204.022
																	4	118.068						2	176.139								3	215.539
																								3	64.938
															T1T2-457 WT E8 Nov 9 2011066	2	1	272.547						4	242.866						T1T2 495 - B1 - Dec1 2011080	4	1	147.363
																	2	127.534						5	165.747								2	123.329
																																	3	201.109
															T1T2-457 WT E8 Nov 9 2011067	5	1	212.078				Oct 25 D1 - t1t376 het060	3	1	185.003								4	132.076
																	2	201.636						2	211.783
																	3	171.237						3	414.845						T1T2 495 - B1 - Dec1 2011081	2	1	102.176
																	4	93.15															2	119.57
																	5	129.869				Oct 25 D1 - t1t376 het061	6	1	322.591
																								2	81.345						T1T2 495 - B1 - Dec1 2011082	3	1	176.819
															T1T2-457 WT E8 Nov 9 2011068	4	1	237.697						3	265.398								2	191.063
																	2	149.833						4	173.358								3	213.701
																	3	145.602						5	257.783
																	4	XXXXXX						6	106.85						T1T2 495 - B1 - Dec1 2011083	5	1	104.317
																																	2	272.809
															T1T2-457 WT E8 Nov 9 2011069	3	1	123.065				Oct 25 D1 - t1t376 het062	6	1	121.696								3	126.147
																	2							2	99.725								4	148.489
																	3	243.016						3	136.312								5	146.014
																								4	131.643
															T1T2-457 WT E8 Nov 9 2011070	4	1	64.885						5	258.588						T1T2 495 - B1 - Dec1 2011084	4	1	168.122
																	2	106.32						6	204.002								2	150.685
																	3	110.168															3	182.858
																	4	116.43				Oct 25 D1 - t1t376 het063	5	1	126.194								4	108.665
																								2	157.433
															T1T2-457 WT E8 Nov 9 2011071	3	1	142.014						3	157.762						T1T2 495 - B1 - Dec1 2011085	3	1
																	2	145.055						4	146.455								2
																	3	126.036						5	236.373								3
															T1T2-457 WT E8 Nov 9 2011072	3	1	143.892				Oct 25 D1 - t1t376 het064	6	1	106.005						T1T2 495 - B1 - Dec1 2011086	2	1
																	2	136.059						2	135.665								2
																	3	99.086						3	97.652
																								4	81.302						T1T2 495 - B1 - Dec1 2011087	5	1
															T1T2-457 WT E8 Nov 9 2011073	3	1	150.586						5	133.417								2
																	2							6	134.38								3
																	3	319.038															4
																						Oct 25 D1 - t1t376 het069		5	153.584	1							5
															T1T2-457 WT E8 Nov 9 2011074	3	1	233.335						6	113.772	2
																	2	138.134						7	272.969	3					T1T2 495 - B1 - Dec1 2011088	4	1
																	3	226.515						8	165.849	4							2
																																	3
															T1T2-457 WT E8 Nov 9 2011075	3	1	177.116				Oct 25 D1 - t1t376 het070		5	244.346	1							4
																	2	115.352						6	271.884	2
																	3	233.848						7	256.267	3					T1T2 495 - B1 - Dec1 2011089	4	1
																										4							2
																																	3
															T1T2-457 WT E8 Nov 9 2011076	2	1	174.657				Oct 25 D1 - t1t376 het071		5	352.278	46.524							4
																	2	193.807						6	305.565	40.389
																															T1T2 495 - B1 - Dec1 2011090	4	1
															T1T2-457 WT E8 Nov 9 2011077	4	1	117.427				Oct 25 D1 - t1t376 het072		5	371.214	1							2
																	2	131.594						6	138.192	2							3
																	3	113.78						7	142.056	3							4
																	4	94.032						8	140.407	4
																	5	135.857													T1T2 495 - B1 - Dec1 2011091	6	1
																						Oct 25 D1 - t1t376 het073		4	133.821	1							2
															T1T2-457 WT E8 Nov 9 2011078	5	1	310.595						5	117.154	2							3
																	2	118.207						6	108.074	3							4
																	3	220.411	65.437														5
																	4	218				Oct 25 D1 - t1t376 het074		8	144.941	1							6
																	5	162.388						9	202.549	2
																								10	126.716	3
															T1T2-457 WT E8 Nov 9 2011079	4	1	162.496						11	95.21	4					T1T2 495 - B1 - Dec1 2011092	3	1
																	2	196.474						12	154.467	5							2
																	3	124.619						13	156.013	6							3
																	4	78.791						14	123.065	7
																															T1T2 495 - B1 - Dec1 2011093	5	1
															T1T2-457 WT E8 Nov 9 2011080	4	1	136.653				Oct 25 D1 - t1t376 het075		5	123.988	1							2
																	2	126.099						6	96.835	2							3
																	3	259.409						7	153.883	3							4
																	4	303.817						8	141.428	4							5
															T1T2-457 WT E8 Nov 9 2011081	4	1	278.368				Oct 25 D1 - t1t376 het076		4	117.414	1					T1T2 495 - B1 - Dec1 2011094	2	1
																	2	173.934						5	231.173	2							2
																	3	312.706						6	238.399	3
																	4	168.122													T1T2 495 - B1 - Dec1 2011095	4	1
																						Oct 25 D1 - t1t376 het077		6	86.533	1							2
															T1T2-457 WT E8 Nov 9 2011082	4	1	165.194						7	309.04	59.828							3
																	2	307.566						8	113.719	3							4
																	3	186.947						9	274.372	4
																	4	119.474								5					T1T2 495 - B1 - Dec1 2011096	2	1
																																	2
															T1T2-457 WT E8 Nov 9 2011083	3	1	108.757				Oct 25 D1 - t1t376 het078		4	165.194	1
																	2	145.121						5	109.371	2					T1T2 495 - B1 - Dec1 2011097	4	1
																	3	268.745						6	152.453	3							2
																																	3
															T1T2-457 WT E8 Nov 9 2011084	2	1	84.528				Oct 25 D1 - t1t376 het079		5	178.017	1							4
																	2	197.626						6	106.231	2
																								7	152.21	3					T1T2 495 - B1 - Dec1 2011098	3	1
															T1T2-457 WT E8 Nov 9 2011085	3	1	230.868						8	180.314	4							2
																	2	91.082															3
																	3	92.779				Oct 25 D1 - t1t376 het080		6	113.635	1
																								7	156.208	2					T1T2 495 - B1 - Dec1 2011099	2	1
															T1T2-457 WT E8 Nov 9 2011086	7	1	148.385						8	214.611	3							2
																	2	181.4						9	178.62	4
																	3	244.663						10	127.44	5					T1T2 495 - B1 - Dec1 2011116	3	1
																	4	216.622															2
																	5	138.196				Oct 25 D1 - t1t376 het081		7	117.648	1							3
																	6	220.493						8	98.351	2
																	7	149						9	112.009	3					T1T2 495 - B1 - Dec1 2011117	1	1
																								10	153.444	4
															T1T2-457 WT E8 Nov 9 2011087	5	1	99.202								5					T1T2 495 - B1 - Dec1 2011118	1	1
																	2	193.507								6
																	3	103.238													T1T2 495 - B1 - Dec1 2011119	2	1
																	4	206.495				Oct 25 D1 - t1t376 het082		8	160.378	1							2
																	5	190.539						9	119.854	2
																								10	169.806	3					T1T2 495 - B1 - Dec1 2011120	2	1
															T1T2-457 WT E8 Nov 9 2011088	2	1	120.88						11	192.333	4							2
																	2	229.687						12	184.201	5
																								13	250	6					T1T2 495 - B1 - Dec1 2011121	5	1
															T1T2-457 WT E8 Nov 9 2011089	6	1	420.073						14	100.344	7							2
																	2	301.682															3
																	3	213.171				Oct 25 D1 - t1t376 het083		5	153.769	1							4
																	4	102.108						6	99.086	2							5
																	5	166.433						7	144.807	3
																	6	xxxx						8	193.494	4					T1T2 495 - B1 - Dec1 2011122	3	1
																																	2
															T1T2-457 WT E8 Nov 9 2011090	3	1	193.598				Oct 25 D1 - t1t376 het084		7	106.099	1							3
																	2	120.075						8	110.436	2
																	3	115.278						9	146.864	3					T1T2 495 - B1 - Dec1 2011123	4	1
																								10	179.524	4							2
															T1T2-457 WT E8 Nov 9 2011091	3	1	133.81						11	216.171	5							3
																	2	81.302						12	112.61	6							4
																	3	211.4
																						Oct 25 D1 - t1t376 het085		6	159.878	1					T1T2 495 - B1 - Dec1 2011124	3	1
															T1T2-457 WT E8 Nov 9 2011092	4	1	194.879						7	108.812	2							2
																	2	109.895						8	112.579	3							3
																	3	54.589						9	176.173	4
																	4	136.624						10	263.068	5					T1T2 495 - B1 - Dec1 2011125	2	1
																																	2
															T1T2-457 WT E8 Nov 9 2011093	3	1	118.794
																	2	244.387													T1T2 495 - B1 - Dec1 2011126	4	1
																	3	306.589															2
																																	3
															T1T2-457 WT E8 Nov 9 2011094	3	1	142.274															4
																	2	119.52
																	3	358.804													T1T2 495 - B1 - Dec1 2011127	2	1
																																	2
															T1T2-457 WT E8 Nov 9 2011095	4	1	199.09
																	2	144.392													T1T2 495 - B1 - Dec1 2011128	5	1
																	3	XXXXXX															2
																	4	XXXXXX															3
																																	4
															T1T2-457 WT E8 Nov 9 2011096	5	1	XXXXXX															5
																	2	XXXXXX
																	3	241.232													T1T2 495 - B1 - Dec1 2011129	5	1
																	4	131.488															2
																	5	89.286				T1T2 - 440 HET B6 Nov 3 2011053	4	1	177.003								3
																								2	XXXXX								4
															T1T2-457 WT E8 Nov 9 2011097	3	1	91.837						3	XXXXX								5
																	2	111.866						4	132.966
																	3	XXXXXX													T1T2 495 - B1 - Dec1 2011130	3	1
																						T1T2 - 440 HET B6 Nov 3 2011054	2	1	233.908								2		56.677
															T1T2-457 WT E8 Nov 9 2011108	3	1	252.446						2	236.172								3
																	2	41.976
																	3	288.141				T1T2 - 440 HET B6 Nov 3 2011055	2	1	213.026						T1T2 495 - B1 - Dec1 2011131	2	1
																								2	215.281								2
															T1T2-457 WT E8 Nov 9 2011109	3	1	174.794
																	2	103.31				T1T2 - 440 HET B6 Nov 3 2011056	5	1	219.893						T1T2 495 - B1 - Dec1 2011132	2	1
																	3	220.518						2	242.002								2
																								3	189.855
															T1T2-457 WT E8 Nov 9 2011110	2	1	144.222						4	157.892						T1T2 495 - B1 - Dec1 2011133	2	1
																	2	156.847						5	103.233								2
															T1T2-457 WT E8 Nov 9 2011111	6	1	115.109				T1T2 - 440 HET B6 Nov 3 2011057	2	1	238.757						T1T2 495 - B1 - Dec1 2011134	2	1
																	2	105.119						2	131.7								2
																	3	115.741
																	4	114.28				T1T2 - 440 HET B6 Nov 3 2011058	3	1	46.4						T1T2 495 - B1 - Dec1 2011135	3	1
																	5	136.894						2	113.071								2
																	6	253.618						3	137.594								3
															T1T2-457 WT E8 Nov 9 2011112	4	1	313.268				T1T2 - 440 HET B6 Nov 3 2011059	3	1	265.096						T1T2 495 - B1 - Dec1 2011139	4	1	127.472
																	2	177.229						2	133.735								2	232.467
																	3	158.398						3	144.25								3	127.413
																	4	149.402															4	163.683
																						T1T2 - 440 HET B6 Nov 3 2011060	2	1	124.101
															T1T2-457 WT E8 Nov 9 2011113	4	1	XXXXXX						2	87.801						T1T2 495 - B1 - Dec1 2011140	1	1	281.753
																	2	388.495
																	3	181.739				T1T2 - 440 HET B6 Nov 3 2011061	2	1	164.344						T1T2 495 - B1 - Dec1 2011141	2	1	329.862	262.364
																	4	396.294						2	277.872								2	106.042
															T1T2-457 WT E8 Nov 9 2011114	5	1	132.257				T1T2 - 440 HET B6 Nov 3 2011062	4	1	114.477						T1T2 495 - B1 - Dec1 2011142	5	1	104.077
																	2	254.503						2	XXXXX								2	153.639
																	3	229.456						3	101.134								3	136.971
																	4	84.481						4	256.846								4	119.407
																	5	172.003															5	270.49
																						T1T2 - 440 HET B6 Nov 3 2011063		5	111.879	1
															T1T2-457 WT E8 Nov 9 2011115	2	1	190.129						6	308.474	2					T1T2 495 - B1 - Dec1 2011143	3	1	106.705
																	2	293.886						7	105.361	3							2	172.456
																								8	149.218	4							3	233.754
															T1T2-457 WT E8 Nov 9 2011116	3	1	233.549
																	2	177.045				T1T2 - 440 HET B6 Nov 3 2011064		4	238.137	1					T1T2 495 - B1 - Dec1 2011144	1	1	201.405
																	3	241.205						5	132.966	2							2	89.944
																								6	318.297	3							3	168.074
															T1T2-457 WT E8 Nov 9 2011117	2	1	300.734	32.757														4	121.413
																	2	107.49				T1T2 - 440 HET B6 Nov 3 2011065		6	328.014	1
																								7	218.563	2					T1T2 495 - B1 - Dec1 2011145	4	1	240.252
															T1T2-457 WT E8 Nov 9 2011118	4	1	106.104						8	72.471	3							2	303.002
																	2	364.198						9	105.603	4							3	126.396
																	3	168.003						10	288.106	5							4	116.482
																	4	159.201
																						T1T2 - 440 HET B6 Nov 3 2011066		3	194.258	1					T1T2 495 - B1 - Dec1 2011146	3	1	116.362
															T1T2-457 WT E8 Nov 9 2011119	4	1	128.082						4	193.217	2							2	90.244
																	2	173.118															3	121.491
																	3	192.585				T1T2 - 440 HET B6 Nov 3 2011067		3	91.181	1
																	4							4	145	2					T1T2 495 - B1 - Dec1 2011147	4	1	111.288
																																	2	243.742
															T1T2-457 WT E8 Nov 9 2011120	2	1	158.433				T1T2 - 440 HET B6 Nov 3 2011068		4	161.805	1							3	88.566
																	2	159.765						5	239.309	2							4	114.63
																								6	234.252	3
															T1T2-457 WT E8 Nov 9 2011121	3	1	181.24													T1T2 495 - B1 - Dec1 2011148	2	1	198.436
																	2	176.204				T1T2 - 440 HET B6 Nov 3 2011069		7	218.9	1							2	96.664
																	3	275.944						8	239.301	2
																								9	179.109	3					T1T2 495 - B1 - Dec1 2011149	2	1	166.865
															T1T2-457 WT E8 Nov 9 2011122	3	1	180.51						10	119.57	4							2	186.593
																	2	123						11	151.727	5
																	3	185.084								6					T1T2 495 - B1 - Dec1 2011150	3	1	201.427
																																	2	148.977
															T1T2-457 WT E8 Nov 9 2011123	2	1	139.818				T1T2 - 440 HET B6 Nov 3 2011070		4	162.151	1							3	93.477
																	2	115.918						5	345.879	2
																								6	166.148	3					T1T2 495 - B1 - Dec1 2011151	2	1	187.754
															T1T2-457 WT E8 Nov 9 2011124	5	1	176.777															2	261.885
																	2	220.771				T1T2 - 440 HET B6 Nov 3 2011071		6	107.005	1
																	3	94.366						7	127.769	2					T1T2 495 - B1 - Dec1 2011152	3	1	116.825
																	4	114.49						8	163.11	3							2	214.189
																	5	XXXXXX						9	212	4							3	84
																								10	76.217	5
															T1T2-457 WT E8 Nov 9 2011125	4	1	296.624				T1T2 - 440 HET B6 Nov 3 2011072
																	2	150.083						4	160.901	1
																	3	183.935						5	254.804	2					T1T2-441 KO C6 - Oct 26 2011053		1	110.802
																	4	349.464	59.386					6	276.002	3							2
																																	3	162.049
															T1T2-457 WT E8 Nov 9 2011126	5	1	157.28				T1T2 - 440 HET B6 Nov 3 2011073		5	256.236	1
																	2	233.105						6	119.616	2					T1T2-441 KO C6 - Oct 26 2011054		1	86.493
																	3	83.546						7	210.098	3							2	239.301
																	4	235.765						8	179.494	4							3	199.812
																	5	153.222
																						T1T2 - 440 HET B6 Nov 3 2011074		3	152	1					T1T2-441 KO C6 - Oct 26 2011055		1	258.805
															T1T2-457 WT E8 Nov 9 2011127	3	1	158.685						4	230.972	2
																	2	244.135													T1T2-441 KO C6 - Oct 26 2011056		1	124.471
																	3	160.228				T1T2 - 440 HET B6 Nov 3 2011075		8	172.965	1
																								9	162.542	2					T1T2-441 KO C6 - Oct 26 2011057		1	106.33
															T1T2-457 WT E8 Nov 9 2011128	4	1	427.85						10	207.068	3							2	79.63
																	2	283.734						11	102.303	4
																	3	241.76						12	66.008	5					T1T2-441 KO C6 - Oct 26 2011058	4	1	xxxxxxxxx
																	4	110.422								6							2	194.258
																										7							3	80.056
															T1T2-457 WT E8 Nov 9 2011129	4	1	116.469															4	184.024
																	2	76.059				T1T2 - 440 HET B6 Nov 3 2011076		4	234.438	1
																	3	210.238						5	164.012	2					T1T2-441 KO C6 - Oct 26 2011059	4	1	260.618
																	4	127.224						6	96.773	3							2	xxxxxxxxx
																																	3	89.32
															T1T2-457 WT E8 Nov 9 2011130	2	1	154.564				T1T2 - 440 HET B6 Nov 3 2011077		5	218.323	1							4	287.587
																	2	230.339						6	146.84	2
																								7	178.751	3					T1T2-441 KO C6 - Oct 26 2011060	4	1	121.655
															T1T2-457 WT E8 Nov 9 2011131	2	1	187.211								4							2	305.197
																	2	133.959															3	96.26
																						T1T2 - 440 HET B6 Nov 3 2011078		3	263.03	1							4	147.462
															T1T2-457 WT E8 Nov 9 2011132	4	1	143.59						4	248.169	2
																	2	XXXXXX													T1T2-441 KO C6 - Oct 26 2011061	6	1	xxxxxxxxx
																	3	XXXXXX				T1T2 - 440 HET B6 Nov 3 2011079		4	255.721	1							2	164.438
																	4	385.389	89.361					5	51.352	2							3	122.483
																								6	240.741	3							4	211.085
															T1T2-457 WT E8 Nov 9 2011133	5	1	305.164															5	124.326
																	2	XXXXXX				T1T2 - 440 HET B6 Nov 3 2011080		5	225.887	1							6	173.612
																	3	80.409						6	145.248	2
																	4	XXXXXX						7	119.08	3					T1T2-441 KO C6 - Oct 26 2011062	1	1	169.366
																	5	169.706						8	195.133	4
																															T1T2-441 KO C6 - Oct 26 2011063	5	1	114.495
															T1T2-457 WT E8 Nov 9 2011134	3	1	142.394				T1T2 - 440 HET B6 Nov 3 2011081		6	108.046	1							2	xxxxxxxxx
																	2	198.517						7	137.201	2							3	112.641
																	3	127.252						8	173.787	3							4	53.6
																								9	128.222	4							5	364.726	82.752
															T1T2-457 WT E8 Nov 9 2011135	3	1	323.501						10	83.241	5
																	2	131.488													T1T2-441 KO C6 - Oct 26 2011064	3	1	234.196
																	3	206.177				T1T2 - 440 HET B6 Nov 3 2011082		4	64.405	1							2	146
																								5	269.295	2							3	263.321
																								6	286.149	3
																															T1T2-441 KO C6 - Oct 26 2011065	0	0
																						T1T2 - 440 HET B6 Nov 3 2011083		3	116.039	1
															T1T373 WT - oct 18 2011052	2	1	192.666						4	223.607	2					T1T2-441 KO C6 - Oct 26 2011066	3	1	102.728
																	2	279.946															2	xxxxxxxxx
																						T1T2 - 440 HET B6 Nov 3 2011084		3	144.222	1							3	270.276
															T1T373 WT - oct 18 2011053	1	1	121.803						4	128.81	2
																															T1T2-441 KO C6 - Oct 26 2011067	3	1	175.555
															T1T373 WT - oct 18 2011054	5	1	104.293				T1T2 - 440 HET B6 Nov 3 2011085		5	225.61	1							2	xxxxxxxxx
																	2	135.718						6	160	2							3	351.814
																	3	295.703						7	95.635	3
																	4	198.595						8	87.641	4
																	5	168.668													T1T2-441 KO C6 - Oct 26 2011067	3	1	151.539
																						T1T2 - 440 HET B6 Nov 3 2011086		2	219.18	1							2
															T1T373 WT - oct 18 2011055	5	1	97.739															3	154.208
																	2	84.723				T1T2 - 440 HET B6 Nov 3 2011087		5	110.68	1
																	3	240.019						6	179.176	2					T1T2-441 KO C6 - Oct 26 2011068	2	1	263.638
																	4	276.669						7	82	3							2	xxxxxxxxx
																	5	199.06						8	143.279	4
																															T1T2-441 KO C6 - Oct 26 2011069	6	1	107.331
															T1T373 WT - oct 18 2011056	3	1	348.174															2	252.353
																	2	131.594															3	130.419
																	3	174.393															4	195.205
																																	5	137.058
															T1T373 WT - oct 18 2011057	3	1																6	153.47
																	2	105.603
																	3	363.142	79.808												T1T2-441 KO C6 - Oct 26 2011070	4	1	134.462
																																	2	181.199
															T1T373 WT - oct 18 2011058	3	1	124.145															3	122.319
																	2	129.958															4	115.156
																	3	177.539
																						T1T2-448 het D6 - Oct 26 2011053	1	1	123.491						T1T2-441 KO C6 - Oct 26 2011071	2	1	298.739
															T1T373 WT - oct 18 2011059	1	1	232.835															2	206.886
																						T1T2-448 het D6 - Oct 26 2011054	2	1	132.966
															T1T373 WT - oct 18 2011060	2	1	156.78						2	91.093						T1T2-441 KO C6 - Oct 26 2011072	2	1	195.059
																	2	216.518															2	272.029
																						T1T2-448 het D6 - Oct 26 2011055	2	1	115.004
															T1T373 WT - oct 18 2011061	4	1	185.456						2	100.125						T1T2-441 KO C6 - Oct 26 2011073	4	1	242.258
																	2	272.753															2	152.634
																	3	133.963				T1T2-448 het D6 - Oct 26 2011056	2	1	131.244								3	137.931
																	4	282.8						2	69.971								4	284.297
																						T1T2-448 het D6 - Oct 26 2011057	3	1	250.06						T1T2-441 KO C6 - Oct 26 2011074	4	1	180.347
															T1T373 WT - oct 18 2011062	3	1	410.278						2	276.471								2	152.84
																	2	90.758						3	79.649								3	176.977
																	3	196.644
																						T1T2-448 het D6 - Oct 26 2011058	2	1	190.055						T1T2-441 KO C6 - Oct 26 2011075	1	1	164.757
																								2	250.45
															T1T373 WT - oct 18 2011063	6	1	224.129													T1T2-441 KO C6 - Oct 26 2011076	2	1	218.836
																	2	169.853				T1T2-448 het D6 - Oct 26 2011059	2	1	XXXXX								2	377.021
																	3	180.967						2	131.928
																	4	187.361													T1T2-441 KO C6 - Oct 26 2011077	3	1	251.575
																	5	158.912				T1T2-448 het D6 - Oct 26 2011060	2	1	91.482								2	148.678
																	6	81.908						2	321.602								3	xxxxxxxxx
															T1T373 WT - oct 18 2011064	7	1	148.003				T1T2-448 het D6 - Oct 26 2011061	2	1	72.139
																	2	237.811						2	381.918						T1T2-441 KO C6 - Oct 26 2011079	2	1	XXXXX
																	3	156.438															2	235.771	65.757
																	4	86.4				T1T2-448 het D6 - Oct 26 2011062	3	1	128.191
																	5	111.4						2	260.555						T1T2-441 KO C6 - Oct 26 2011080	4	1	238.027
																	6	161.623						3	311.219								2	180.812
																	7	268.961															3	148.839
																						T1T2-448 het D6 - Oct 26 2011063		4	105.802	1							4	104.019
															T1T373 WT - oct 18 2011065	4	1	258.745						5	234.258	2
																	2	110.887						6	105.546	3					T1T2-441 KO C6 - Oct 26 2011081	3	1	276.002
																	3	128.062															2	326.12
																	4	295.102				T1T2-448 het D6 - Oct 26 2011064		4	211	1							3	254.38
																								5	105.209	2
															T1T373 WT - oct 18 2011066	6	1	141.46						6	92.195	3					T1T2-441 KO C6 - Oct 26 2011082	2	1	170
																	2	268.119															2	136.565
																	3	151.855				T1T2-448 het D6 - Oct 26 2011065		4	234.241	1
																	4	168.514						5	182.321	2					T1T2-441 KO C6 - Oct 26 2011083	3	1	262.069
																	5	XXXXX								3							2	165.656
																	6	105															3	171.003
																						T1T2-448 het D6 - Oct 26 2011066		4	346.013	1
															T1T373 WT - oct 18 2011067	3	1	318.496						5	163.417	2					T1T2-441 KO C6 - Oct 26 2011084	3	1	94.372
																	2	110.277						6	91.706	3							2	208.777
																	3	232.106															3	337.285
																						T1T2-448 het D6 - Oct 26 2011067		5	257.257	1
															T1T373 WT - oct 18 2011068	3	1	260.492						6	124.403	2					T1T2-441 KO C6 - Oct 26 2011085	1	1	204.198
																	2	132.257						7	381.587	3
																	3	214.002						8	359.347	4					T1T2-441 KO C6 - Oct 26 2011086	2	1	287.793
																																	2	121.264
															T1T373 WT - oct 18 2011069	4	1	XXXXX				T1T2-448 het D6 - Oct 26 2011068		3	233.452	1
																	2	104.484						4	148.556	2					T1T2-441 KO C6 - Oct 26 2011087	2	1	399.08
																	3	219.92															2	234.35
																	4	126.036				T1T2-448 het D6 - Oct 26 2011069		4	358.675	1
																								5	101.316	2					T1T2-441 KO C6 - Oct 26 2011088	6	1	141.736
															T1T373 WT - oct 18 2011070	5	1	98.27						6	270.74	3							2	XXXXX
																	2	185.367															3	159.013
																	3	140.014				T1T2-448 het D6 - Oct 26 2011070		6	171.732	1							4	147.435
																	4	115.624						7	242.332	2							5	236.764
																	5	137.615						8	101.823	3							6	127.393
																								9	207.87	4
															T1T373 WT - oct 18 2011071	4	1	263.097	54.037					10	135.724	5					T1T2-441 KO C6 - Oct 26 2011089	3	1	329.619
																	2	113.088															2	150
																	3	91.22				T1T2-448 het D6 - Oct 26 2011071		5	265.204	1							3	277.354	71.038
																	4	240.252						6	104.785	2
																								7	100.717	3					T1T2-441 KO C6 - Oct 26 2011090	2	1	233.735
															T1T373 WT - oct 18 2011072	7	1	223.652						8	131.244	4
																	2	211.244
																	3	86.683				T1T2-448 het D6 - Oct 26 2011072		5	342.381	1					T1T2-441 KO C6 - Oct 26 2011091	1	1	171.965
																	4	237.489						6	176.139	2
																	5	139.032						7	203.066	3					T1T2-441 KO C6 - Oct 26 2011092	2	1	121.754
																	6	160.415						8	164.685	4							2	104.307
																	7	141.227
																						T1T2-448 het D6 - Oct 26 2011073		3	114.826	1					T1T2-441 KO C6 - Oct 26 2011093	1	1	117.835
															T1T373 WT - oct 18 2011073	4	1	110.887						4	223.652	2
																	2	146.24													T1T2-441 KO C6 - Oct 26 2011094	3	1	274.855
																	3	281.954				T1T2-448 het D6 - Oct 26 2011074		5	124.74	1							2	197.434
																	4	183.218						6	131.034	2							3	268.419
																	5	145.454						7	128.631	3
																								8	145.784	4					T1T2-441 KO C6 - Oct 26 2011095	3	1	157.589
															T1T373 WT - oct 18 2011074	7	1	105.948															2	147.231
																	2	243.526				T1T2-448 het D6 - Oct 26 2011075		3	136.484	1							3	330.847
																	3	174.874						4	174.402	2
																	4	119.641													T1T2-441 KO C6 - Oct 26 2011096	2	1	132.31
																	5	206.189				T1T2-448 het D6 - Oct 26 2011076		3	170.038	1							2	296.897
																	6	108.812						4	213.759	2
																	7	107.299													T1T2-441 KO C6 - Oct 26 2011097	2	1	XXXXX
																						T1T2-448 het D6 - Oct 26 2011077		4	148.661	1							2	XXXXX
															T1T373 WT - oct 18 2011075	2	1	127.472						5	391.337	2
																	2	88.566						6	252.509	3					T1T2-441 KO C6 - Oct 26 2011098	3	1	133.701
																	3	245.106															2	196.469
																						T1T2-448 het D6 - Oct 26 2011078		6	173.807	1							3	84.172
															T1T373 WT - oct 18 2011076	3	1	109.005						7	249.447	2
																	2	132.608						8	260.86	3					T1T2-441 KO C6 - Oct 26 2011099	2	1	346.919
																	3	141.993						9	256.587	4							2	109.731
																								10	131.366	5
															T1T373 WT - oct 18 2011077	5	1	169.035													T1T2-441 KO C6 - Oct 26 2011100	2	1	254.804
																	2	131.042				T1T2-448 het D6 - Oct 26 2011079		4	193.786	1							2	136.4
																	3	162.388						5	312.162	2
																	4	XXXXX						6	245.055	3					T1T2-441 KO C6 - Oct 26 2011101	1	1	234.61	73.12
																	5	213.009
																						T1T2-448 het D6 - Oct 26 2011080		4	145.99	1					T1T2-441 KO C6 - Oct 26 2011102	2	1	135.351
															T1T373 WT - oct 18 2011078	3	1	437.979	69.57					5	224.537	2							2	212.869
																	2	162.542						6	249.451	3
																	3	281.626													T1T2-441 KO C6 - Oct 26 2011103	3	1	116.108
																						T1T2-448 het D6 - Oct 26 2011082		3	162.111	1							2	164.11
															T1T373 WT - oct 18 2011079	3	1	XXXXX						4	89.269	2							3	274.345
																	2	101.415
																	3	260.722													T1T2-441 KO C6 - Oct 26 2011104	1	1	145.121
																						T1T2-448 het D6 - Oct 26 2011083		2	111.041	1
															T1T373 WT - oct 18 2011080	5	1	90.471													T1T2-441 KO C6 - Oct 26 2011105	2	1	203.961
																	2	155.416															2	165.702
																	3	108.231
																	4	179.011				T1T2-448 het D6 - Oct 26 2011084		5	312.103	1					T1T2-441 KO C6 - Oct 26 2011106	6	1	187.2
																	5	216.342						6	181.24	2							2	158.221
																								7	261.199	3							3	191.207
															T1T373 WT - oct 18 2011081	3	1	219.866						8	108.167	4							4	57.871
																	2	234.03															5	146.349
																	3	152.977				T1T2-448 het D6 - Oct 26 2011085		2	153.222	1							6	149.03
																																		137.244
															T1T373 WT - oct 18 2011082	5	1	110.055				T1T2-448 het D6 - Oct 26 2011086		4	232.948	1
																	2	141.549						5	146.11	2					T1T2-441 KO C6 - Oct 26 2011107	3	1	110.454
																	3	192.72						6	171.4	3							2	135.207
																	4	282.708															3	89.889
																	5	142.243				T1T2-448 het D6 - Oct 26 2011087		4	175.787	1
																								5	147.597	2					T1T2-441 KO C6 - Oct 26 2011108	3	1	272.575
															T1T373 WT - oct 18 2011083	3	1	116.97						6	147.757	3							2	222.926
																	2	179.805															3	306.026
																	3	259.326				T1T2-448 het D6 - Oct 26 2011088		4	149.091	1
																								5	131.21	2					T1T2-441 KO C6 - Oct 26 2011109	1	1	243.288
															T1T373 WT - oct 18 2011084	5	1	118.068						6	193.039	3
																	2	106.677													T1T2-441 KO C6 - Oct 26 2011110	2	1	191.802
																	3	135.133				T1T2-448 het D6 - Oct 26 2011089		4	183.003	1							2	194.487
																	4	195.028						5	244.346	2
																	5	213.6						6	172.887	3					T1T2-441 KO C6 - Oct 26 2011111	4	1	232.757
																																	2	316.082
															T1T373 WT - oct 18 2011085	4	1	187.446				T1T2-448 het D6 - Oct 26 2011090		4	251.813	1							3	328.093
																	2	129.201						5	187.003	2							4	152.322
																	3	252.301						6	128.503	3
																	4	286.681													T1T2-441 KO C6 - Oct 26 2011112	5	1	77.827
																						T1T2-448 het D6 - Oct 26 2011091		3	132.004	1							2	317.844
															T1T373 WT - oct 18 2011086	5	1									2							3	114.586
																	2	189.188	44.045														4	98.184
																	3	323.371															5	310.002	85.054
																	4					T1T2-448 het D6 - Oct 26 2011092		5	127.098	1
																	5	150.266						6	132.378	2					T1T2-441 KO C6 - Oct 26 2011113	4	1	181.618
																								7	203.59	3							2	248.115
															T1T373 WT - oct 18 2011087	3	1	202.193						8	204.12	4							3	XXXXX
																	2	172.792															4	320.403
																	3	209.688				T1T2-448 het D6 - Oct 26 2011093		3	134.48	1
																								4	161.988	2					T1T2-441 KO C6 - Oct 26 2011114	4	1	266.312
															T1T373 WT - oct 18 2011088	7	1	93.744															2	89.627
																	2	183.565															3	147.272
																	3	141.028				T1T2-448 het D6 - Oct 26 2011094		5	172.525	1							4	70.228
																	4	139.402						6	183.674	2
																	5	111.826						7	137.877	3					T1T2-441 KO C6 - Oct 26 2011115	4	1	144.941
																	6	100.722						8	220.907	4							2	XXXXX
																	7	58.822															3	228.09
																						T1T2-448 het D6 - Oct 26 2011095		5	147.706	1							4	187.771
															T1T373 WT - oct 18 2011089	3	1	112.721						6	219.401	2
																	2	144.014						7	183.175	3					T1T2-441 KO C6 - Oct 26 2011116	3	1	125.67
																	3	141.566						8	113.071	4							2	221.939
																																	3	151.921
															T1T373 WT - oct 18 2011090	3	1	140.004				T1T2-448 het D6 - Oct 26 2011096		5	295.455	1
																	2	192.606						6	137.295	2					T1T2-441 KO C6 - Oct 26 2011117	2	1	246.812
																	3	269.208						7	180.314	3							2	93.172
																								8	196.474	4
															T1T373 WT - oct 18 2011091	3	1	111.611													T1T2-441 KO C6 - Oct 26 2011118	1	1	288.721
																	2	124.483
																	3	136.565													T1T2-441 KO C6 - Oct 26 2011119	3	1	138.654
																																	2	294.898	90.071
															T1T373 WT - oct 18 2011092	4	1	158.521															3	201.695
																	2	142.636
																	3	167.045													T1T2-441 KO C6 - Oct 26 2011120	3	1	146.537
																	4	73.41															2	195.438
																																	3	104.12
															T1T373 WT - oct 18 2011093	3	1	124.258
																	2	158.319													T1T2-441 KO C6 - Oct 26 2011121	3	1	214.514
																	3	170.423															2	243.446
																																	3	173.787
															T1T373 WT - oct 18 2011094	3	1	211.625
																	2	157.544													T1T2-441 KO C6 - Oct 26 2011122	1	1	292.535
																	3	107.336
																															T1T2-441 KO C6 - Oct 26 2011123	2	1	500.277
															T1T373 WT - oct 18 2011095	3	1	310.247															2	110.788
																	2	169.012
																	3	279.12													T1T2-441 KO C6 - Oct 26 2011124	4	1	167.108
																																	2	186.703
															T1T373 WT - oct 18 2011096	4	1	277.115															3	200.282
																	2	354.318															4	177.178
																	3	191.003
																	4	232.175													T1T2-441 KO C6 - Oct 26 2011125	2	1	135.03
																																	2	170.485
															T1T373 WT - oct 18 2011097	4	1	132.834
																	2	272.281													T1T2-441 KO C6 - Oct 26 2011126	4	1	263.048
																	3	162.595															2	293.483
																	4	164.514															3	162.788
																																	4	133.686
															T1T373 WT - oct 18 2011098	7	1	XXXXX
																	2	145.413													T1T2-441 KO C6 - Oct 26 2011127	3	1	83.385
																	3	128.565															2	128.098
																	4	143.199															3	134.332
																	5	124.724
																	6	110.422													T1T2-441 KO C6 - Oct 26 2011128	3	1	106
																	7	135.794															2
																	8	100.658															3	180.294
															T1T373 WT - oct 18 2011099	4	1	121.709													T1T2-441 KO C6 - Oct 26 2011129	4	1	148.007
																	2	123.81															2	128.55
																	3	136.191															3	156.518
																	4	109.385															4	277.186
															T1T373 WT - oct 18 2011100	1	1	268.151													T1T2-441 KO C6 - Oct 26 2011130	4	1	324.895
																																	2	184.808
															T1T373 WT - oct 18 2011101	4	1	121.037															3	70.682
																	2	79.649															4	104.278
																	3	147.99
																	4	155.589													T1T2-441 KO C6 - Oct 26 2011131	3	1	126.115
																																	2	272.905
															T1T373 WT - oct 18 2011102	3	1	258.898															3	283.478	50.915
																	2	190.979
																	3
															T1T373 WT - oct 18 2011103	7	1	218.387													T1T2 497 - C1 - Dec 1 2011070	4	1	160.012
																	2	92.136															2	118.229
																	3	369.486															3	109.604
																	4	333.084															4	90.477
																	5	149.616
																	6	160.602													T1T2 497 - C1 - Dec 1 2011071	3	1	158.382
																	7	153.003															2	272.927
																																	3	88.091
															T1T373 WT - oct 18 2011104	4	1	66.843
																	2	170.038													T1T2 497 - C1 - Dec 1 2011072	2	1	110.476
																	3	326.833															2	107.48
																	4	170.062
																															T1T2 497 - C1 - Dec 1 2011073	2	1	182.455
															T1T373 WT - oct 18 2011105	3	1	113.23															2	134.648
																	2	122.577
																	3	252.002													T1T2 497 - C1 - Dec 1 2011074	4	1	215.337
																																	2	257.099
															T1T373 WT - oct 18 2011106	4	1	154.742															3	183.853
																	2	131.472															4	127.738
																	3	309.716
																	4	133.255													T1T2 497 - C1 - Dec 1 2011075	3	1	95.525
																																	2	177.89
															T1T373 WT - oct 18 2011107	4	1	205.854															3	85.866
																	2	253.071
																	3	152.191													T1T2 497 - C1 - Dec 1 2011076	3	1	173.899
																	4	121.655															2	187.043
																																	3	227.903
															T1T373 WT - oct 18 2011108	4	1	260.094
																	2	109.115													T1T2 497 - C1 - Dec 1 2011077	5	1	106.301
																	3	123.065															2	158.041
																	4	316.078															3	218.799
																																	4	83.385
															T1T373 WT - oct 18 2011109	5	1	89.022															5	164.73
																	2	166.901
																	3	67.119													T1T2 497 - C1 - Dec 1 2011078	5	1	176.955
																	4	93.038															2	130.863
																	5	123.709															3	106.283
																	6	211.729															4	85.703
																																	5	121.824
															T1T373 WT - oct 18 2011110	5	1	109.659
																	2	177.882													T1T2 497 - C1 - Dec 1 2011079	3	1	141.439
																	3	83.217															2	81.707	60.806
																	4	190.066															3	337.522
																	5	XXXXX
																															T1T2 497 - C1 - Dec 1 2011080	1	1	117.886			XXXXX
															T1T373 WT - oct 18 2011111	5	1	138.177
																	2	122													T1T2 497 - C1 - Dec 1 2011081	4	1	86.267
																	3	148.637															2	118.089
																	4	130.771															3	257.194
																	5	224.179															4	136.308
															T1T373 WT - oct 18 2011112	4	1	XXXXX													T1T2 497 - C1 - Dec 1 2011082	4	1	262.053
																	2	146.11															2	92.439
																	3	261.082	31.385														3	168.55
																	4	193.982															4	275.588
															T1T373 WT - oct 18 2011113	5	1	112.147													T1T2 497 - C1 - Dec 1 2011083	1	1	168.19
																	2	396.062	76.224
																	3	91.679													T1T2 497 - C1 - Dec 1 2011084	3	1	195.167
																	4	107.424															2	78.16
																	5	159.261															3	113.358
															T1T373 WT - oct 18 2011114	8	1	288.444													T1T2 497 - C1 - Dec 1 2011085	3	1	276.632
																	2	114.965															2	193.065
																	3	198.172															3	126.127
																	4	113.283
																	5	XXXXX													T1T2 497 - C1 - Dec 1 2011086	2	1	113.565
																	6	98.27															2	208.856
																	7	83.57
																	8	93.723													T1T2 497 - C1 - Dec 1 2011087	4	1	162.308
																																	2	200.691
															T1T373 WT - oct 18 2011115	6	1	161.047															3	163.23
																	2	125.252															4	189.235
																	3	110.494
																	4	151.38													T1T2 497 - C1 - Dec 1 2011088	2	1	219.495
																	5	136.059															2	94.26
																	6	XXXXX
																															T1T2 497 - C1 - Dec 1 2011089	4	1	262.469
															T1T373 WT - oct 18 2011116	3	1	118.068															2	159.327
																	2	139.714															3	239.633
																	3	94.048															4	163.083
															T1T373 WT - oct 18 2011117	4	1	152.738													T1T2 497 - C1 - Dec 1 2011090	3	1	152.643
																	2	125.16															2	229.652
																	3	174.748															3	162.825
																	4	144.125
																															T1T2 497 - C1 - Dec 1 2011091	4	1	141.852
															T1T373 WT - oct 18 2011118	3	1	175.114															2	160.24
																	2	179.602															3	164.924
																	3	200.878															4	140.769
															T1T373 WT - oct 18 2011119	2	1	204													T1T2 497 - C1 - Dec 1 2011092	3	1	260.05
																	2	317.624															2	402.934
																																	3	146.031
															T1T373 WT - oct 18 2011120	5	1	306.544
																	2	179.778													T1T2 497 - C1 - Dec 1 2011093	2	1	201.301
																	3	71.512															2	185.367
																	4	316.809
																	5	XXXXX													T1T2 497 - C1 - Dec 1 2011094	4	1	193.352
																																	2	138.004
																																	3	207.885
																																	4	238.531
															T1T2-374 WT - C1 - Oct 26 2011052	1	1	255.196													T1T2 497 - C1 - Dec 1 2011095	3	1	98.372
																																	2	92.347
															T1T2-374 WT - C1 - Oct 26 2011053	4	1	171.549															3	182.562
																	2	104.805
																	3	214.462													T1T2 497 - C1 - Dec 1 2011096	7	1	169
																	4	207.386															2	185.521
																																	3	253.842
															T1T2-374 WT - C1 - Oct 26 2011054	5	1	149.201															4	162.197
																	2	117.546															5	189.423
																	3	114.004															6	113.437
																	4	248.709															7	144.499
																	5	177.133
																															T1T2 497 - C1 - Dec 1 2011097	4	1	104.738
															T1T2-374 WT - C1 - Oct 26 2011055	5	1	XXXXXX															2	141.209
																	2	109.659															3	99.156
																	3	69.181															4	154.467
																	4	187.278
																	5	257.63													T1T2 497 - C1 - Dec 1 2011098	5	1	181.43
																																	2	113.071
															T1T2-374 WT - C1 - Oct 26 2011056	4	1	121.824															3	188.215
																	2	152.329															4	199.331
																	3	204.353															5	179.12
																	4	120.967
																															T1T2 497 - C1 - Dec 1 2011099	5	1	236.685
															T1T2-374 WT - C1 - Oct 26 2011057	4	1	279.652	72.564														2	112.294
																	2	154.35															3	82.976
																	3	181.574															4	135.207
																	4	148.003															5	100.623
															T1T2-374 WT - C1 - Oct 26 2011058	2	1	145.499													T1T2 497 - C1 - Dec 1 2011100	6	1	109.708
																	2	131.046															2	117.388
																																	3	328.722
															T1T2-374 WT - C1 - Oct 26 2011059	6	1	276.525															4	284.951	44.105
																	2	80.262															5	228.561	61.485
																	3	217.267															6	101.242
																	4	202.704
																	5	168.297													T1T2 497 - C1 - Dec 1 2011101	3	1	261.228
																	6	90.449															2	XXXXX
																																	3	231.041
															T1T2-374 WT - C1 - Oct 26 2011060	5	1	74.947
																	2	239.585													T1T2 497 - C1 - Dec 1 2011102	2	1	270.407	92.452
																	3	207.068															2	99.02
																	4	119.218
																	5	160.702													T1T2 497 - C1 - Dec 1 2011103	3	1	175.111
																																	2	91.285
															T1T2-374 WT - C1 - Oct 26 2011061	3	1	126.874															3	210.737
																	2	159.389
																	3	132.503													T1T2 497 - C1 - Dec 1 2011104	2	1	331.699
																																	2	125.543
															T1T2-374 WT - C1 - Oct 26 2011062	6	1	104.623
																	2	111.893													T1T2 497 - C1 - Dec 1 2011105	5	1	188.279
																	3	112.071															2	268.745
																	4	XXXXX															3	134.164
																	5	XXXXX															4	XXXXX
																	6	158.051															5	157.099
															T1T2-374 WT - C1 - Oct 26 2011063	9	1	160													T1T2 497 - C1 - Dec 1 2011106	2	1	239.019
																	2	119.817															2	175.445
																	3	191.719
																	4	107.355													T1T2 497 - C1 - Dec 1 2011107	3	1	118.296
																	5	238.472															2	272.606
																	6	96.566															3	154.806
																	7	125
																	8	135.204													T1T2 497 - C1 - Dec 1 2011108	4	1	242.244
																	9	86.371															2	193
																																	3	158.824
															T1T2-374 WT - C1 - Oct 26 2011064	4	1	111.113															4	167.362
																	2	XXXXX
																	3	60													T1T2 497 - C1 - Dec 1 2011109	4	1	248.485
																	4	93.606															2	271.737
																																	3	84.172
															T1T2-374 WT - C1 - Oct 26 2011065	6	1	284.176															4	166.193
																	2	139.846
																	3	74.813													T1T2 497 - C1 - Dec 1 2011110	2	1	256.125
																	4	XXXXX															2	281.4
																	5	93.059
																	6	225.18													T1T2 497 - C1 - Dec 1 2011111	3	1	90.139
																																	2	197.608
															T1T2-374 WT - C1 - Oct 26 2011066	5	1	136.341															3	225.763
																	2	192.772
																	3	180.469													T1T2 497 - C1 - Dec 1 2011112	2	1	131.042
																	4	227.403															2	97.329
																	5	XXXXX
																															T1T2 497 - C1 - Dec 1 2011113	3	1	109.33
															T1T2-374 WT - C1 - Oct 26 2011067	6	1	77.795															2	255.783
																	2	137.233															3	246.984
																	3	230.341
																	4	220.02													T1T2 497 - C1 - Dec 1 2011114	3	1	244.295
																	5	167.505															2	114.057
																	6	186.904															3	110.168
															T1T2-374 WT - C1 - Oct 26 2011068	4	1	89.107													T1T2 497 - C1 - Dec 1 2011115	4	1	96.509
																	2	122.004															2	237.497
																	3	193.67															3	247.536
																	4	120.416															4	210.09
															T1T2-374 WT - C1 - Oct 26 2011069	7	1	95.854													T1T2 497 - C1 - Dec 1 2011116	4	1	242.043
																	2	164.195															2	279.517
																	3	89.14															3	124.964
																	4	94.085															4	189.974
																	5	97.247
																	6	162.816													T1T2 497 - C1 - Dec 1 2011117	3	1	181
																	7	222.248	66.147														2	153.844
																																	3	102.694
															T1T2-374 WT - C1 - Oct 26 2011070	3	1	167.045
																	2	130.081													T1T2 497 - C1 - Dec 1 2011118	8	1	151.208
																	3	144.309															2	62.201
																																	3	208.677
															T1T2-374 WT - C1 - Oct 26 2011071	4	1	303.2															4	242.553
																	2	XXXXX															5	136.953
																	3	222.02															6	127.063
																	4	90.918															7	71.197
																																	8	151.793
															T1T2-374 WT - C1 - Oct 26 2011072
																															T1T2 497 - C1 - Dec 1 2011119	5	1	95.189
																																	2	110.752
															T1T2-374 WT - C1 - Oct 26 2011073	3	1	85.376															3	129.244
																	2	257.498															4	161.05
																	3	172.325															5	117.614
															T1T2-374 WT - C1 - Oct 26 2011074	7	1	249.195													T1T2 497 - C1 - Dec 1 2011120	3	1	262.937
																	2	160.253															2	145.496
																	3	121.413															3	242.72
																	4	271.562
																	5	XXXXX													T1T2 497 - C1 - Dec 1 2011121	2	1	231.625
																	6	110.345															2	223.893
																	7	256.018
																															T1T2 497 - C1 - Dec 1 2011122	2	1	140.089
															T1T2-374 WT - C1 - Oct 26 2011075	7	1	76.655															2	261.962
																	2	276.904
																	3	443.086													T1T2 497 - C1 - Dec 1 2011123	5	1	184.174
																	4	XXXXX															2	197.205
																	5	243.508															3	123.794
																	6	80.399															4	111.544
																	7	215.035															5	175.801
															T1T2-374 WT - C1 - Oct 26 2011076	4	1	XXXXX													T1T2 497 - C1 - Dec 1 2011124	4	1	120.603
																	2	211.123															2	304.385
																	3	161.137															3	127.142
																	4	90.736															4	101.533
															T1T2-374 WT - C1 - Oct 26 2011077	4	1	244.739	74.11												T1T2 497 - C1 - Dec 1 2011125	3	1	117.388
																	2	154.674															2	107.629
																	3	217.497															3	281.704
																	4	137.186
																															T1T2 497 - C1 - Dec 1 2011126	6	1	98.762
															T1T2-374 WT - C1 - Oct 26 2011078	5	1	233.452															2	148.57
																	2	148.368															3	205.682
																	3	153.075															4	XXXXX
																	4	193.546															5	84.812
																	5	XXXXX															6	110.073
															T1T2-374 WT - C1 - Oct 26 2011079	3	1	153.834
																	2	139.714
																	3	77.666
															T1T2-374 WT - C1 - Oct 26 2011080	4	1	63.953
																	2	110.941
																	3	149.723
																	4	137.928
															T1T2-374 WT - C1 - Oct 26 2011081	6	1	201.675
																	2	126.02
																	3	140.186
																	4	117.388
																	5	276.409
																	6	197.041
															T1T2-374 WT - C1 - Oct 26 2011082	6	1	63.561
																	2	179.622
																	3	147.665
																	4	171.143
																	5	180.228
																	6	243.378
															T1T2-374 WT - C1 - Oct 26 2011083	5	1	122.201
																	2	94.366
																	3	260.317
																	4	262.932
																	5	150.562
															T1T2-374 WT - C1 - Oct 26 2011084	8	1	192.44
																	2	246.1
																	3	106.888
																	4	158.521
																	5	126.02
																	6	144.627
																	7	140.129
																	8	102.02
															T1T2-374 WT - C1 - Oct 26 2011085	5	1	162.856
																	2	136.029
																	3	122.319
																	4	151.182
																	5	266.807
															T1T2-374 WT - C1 - Oct 26 2011086	4	1	281.002
																	2	389.955
																	3	222.657
																	4	97.801
															T1T2-374 WT - C1 - Oct 26 2011087	1	1	217.205
															T1T2-374 WT - C1 - Oct 26 2011088	7	1	134.239
																	2	191.51
																	3	262.835
																	4	156.426
																	5	60.033
																	6	109.124
																	7	198.769
															T1T2-374 WT - C1 - Oct 26 2011089	6	1	149.773
																	2	106.471
																	3	126.004
																	4	239.14
																	5	100.285
																	6	178.138
															T1T2-374 WT - C1 - Oct 26 2011090	3	1	122
																	2	164.012
																	3	159.364
															T1T2-374 WT - C1 - Oct 26 2011091	4	1	236.578
																	2	120.748
																	3	238.657
																	4	244.696	71.677
															T1T2-374 WT - C1 - Oct 26 2011092	7	1	67.119
																	2	138.885
																	3	260.969
																	4	XXXXX
																	5	112.947
																	6	94.414
																	7	188.82
															T1T2-374 WT - C1 - Oct 26 2011093	3	1	238.355
																	2	320.751
																	3	230.002
															T1T2-374 WT - C1 - Oct 26 2011094	7	1	148.862
																	2	170.062
																	3	220.735
																	4	83.487
																	5	184.201
																	6	266.582
																	7	117.546
															T1T2-374 WT - C1 - Oct 26 2011095	6	1	103.697
																	2	95.52
																	3	222.081
																	4	85.44
																	5	68.819
																	6	137.713
															T1T2-374 WT - C1 - Oct 26 2011096	3	1	109.179
																	2	78
																	3	300.673
															T1T2-374 WT - C1 - Oct 26 2011097	5	1	241.961
																	2	91
																	3	242.528
																	4	133.417
																	5	233.118
															T1T2-374 WT - C1 - Oct 26 2011098	1	1	363.167
															T1T2-374 WT - C1 - Oct 26 2011099	3	1	248.131
																	2	188.175
																	3	137.033
															T1T2-374 WT - C1 - Oct 26 2011100	4	1	190.948
																	2	560.143	60.239
																	3	216.28
																	4	202.148

## Sheet: Sheet1
Spine Width (nm)
	WT	WT	WT	WT	HET	HET	HET	HET	DKO	DKO	DKO	DKO
	620.728	606.481	589.753	554.019	592.425	610.639	648.894	569.113	580.444	664.817	596.536	591.211
	16.8606	36.3743	39.4045	44.2155	54.0807	57.9593	59.2356	52.1705	65.3051	45.2351	42.394	55.372
	3.496	3.496	3.496	6.5	3.496	3.496	3.496	6.5	3.496	3.496	3.496	6.5
Spine WIdth (pixels)
	WT	WT	WT	WT	HET	HET	HET	HET	DKO	DKO	DKO	DKO
	177.554	173.479	168.694	85.2337	169.458	174.668	185.61	87.5558	166.031	190.165	170.634	90.9555
	4.82281	10.4046	11.2713	6.80239	15.4693	16.5787	16.9438	8.02623	18.6799	12.9391	12.1264	8.51877
	230	278	224	157	120	111	120	119	207	216	198	114
						p-value WT vs. KO (n=3)
						0.543017
	WT	HET	DKO
	592.745	605.268	608.252	0.0261615		p-value WT vs. HET (n=3)
	14.377	16.843	19.1497			0.592729
						p-value HET vs. KO (n=3)
						0.910718
