# Supplementary material for: Distinct but overlapping roles of LRRTM1 and LRRTM2 in developing and mature hippocampal circuits
Source: eLife. 2022 Jun 6;11:e64742. doi: 10.7554/eLife.64742 (PMC9170246; doi:10.7554/eLife.64742)
Supplement: Figure 3—source data 1. [file elife-64742-fig3-data1.xlsx]

## Sheet: Insets
	WT	Amplitude	Frequency				DKO	Amplitude	Frequency
	1	11.625	0.777778				1	15.5256	2.05
	2	12.1547	2.72222				2	18.9667	1.65
	3	13.2366	2.55				3	15.6921	1.78889
	4	15.8437	1.18889				4	10.4223	1.26667
	5	11.0459	2.70556				5	9.46421	2.33889
	6	11.8616	3.24444				6	12.6237	1.92778
	7	11.8541	3.55				7	12.4739	0.972222
	8	12.2964	3.08333				8	14.407	2.81111
	9	12.9074	2.88333				9	14.7046	0.905556
	10	16.4893	3.68889				10	10.8342	1.20556
							11	11.8192	1.01667

## Sheet: Cumulative
DKO	5.005	0.000310752	0.0310752	DKO	0.9	0.000311042	0.0311042	WT		5.005	0.00019861	0.019861	WT		0.3	0.000202347	0.0202347
Amp	5.066	0.000621504	0.0621504	Freq	3.4	0.000622084	0.0622084	Amp		5.005	0.000397219	0.0397219	Freq		0.4	0.000404694	0.0404694
	5.066	0.000932256	0.0932256		4.9	0.000933126	0.0933126			5.066	0.000595829	0.0595829			0.8	0.000607042	0.0607042
	5.127	0.00124301	0.124301		8.4	0.00124417	0.124417			5.127	0.000794439	0.0794439			1.5	0.000809389	0.0809389
	5.127	0.00155376	0.155376		11.7	0.00155521	0.155521			5.127	0.000993049	0.0993049			1.6	0.00101174	0.101174
	5.127	0.00186451	0.186451		12.1	0.00186625	0.186625			5.127	0.00119166	0.119166			2.4	0.00121408	0.121408
	5.127	0.00217526	0.217526		13.3	0.00217729	0.217729			5.127	0.00139027	0.139027			2.7	0.00141643	0.141643
	5.127	0.00248602	0.248602		13.4	0.00248834	0.248834			5.127	0.00158888	0.158888			2.8	0.00161878	0.161878
	5.188	0.00279677	0.279677		13.7	0.00279938	0.279938			5.188	0.00178749	0.178749			4	0.00182113	0.182113
	5.188	0.00310752	0.310752		15.2	0.00311042	0.311042			5.188	0.0019861	0.19861			4.4	0.00202347	0.202347
	5.188	0.00341827	0.341827		15.3	0.00342146	0.342146			5.188	0.00218471	0.218471			4.5	0.00222582	0.222582
	5.188	0.00372902	0.372902		15.6	0.0037325	0.37325			5.188	0.00238332	0.238332			4.7	0.00242817	0.242817
	5.188	0.00403978	0.403978		15.7	0.00404355	0.404355			5.249	0.00258193	0.258193			5.8	0.00263051	0.263051
	5.249	0.00435053	0.435053		15.9	0.00435459	0.435459			5.249	0.00278054	0.278054			6.7	0.00283286	0.283286
	5.249	0.00466128	0.466128		16	0.00466563	0.466563			5.249	0.00297915	0.297915			7.4	0.00303521	0.303521
	5.249	0.00497203	0.497203		17.6	0.00497667	0.497667			5.249	0.00317776	0.317776			7.5	0.00323756	0.323756
	5.31	0.00528278	0.528278		18.1	0.00528771	0.528771			5.31	0.00337637	0.337637			7.6	0.0034399	0.34399
	5.31	0.00559354	0.559354		18.2	0.00559876	0.559876			5.31	0.00357498	0.357498			9.3	0.00364225	0.364225
	5.31	0.00590429	0.590429		18.3	0.0059098	0.59098			5.31	0.00377358	0.377358			10.5	0.0038446	0.38446
	5.31	0.00621504	0.621504		18.3	0.00622084	0.622084			5.371	0.00397219	0.397219			11.3	0.00404694	0.404694
	5.31	0.00652579	0.652579		19	0.00653188	0.653188			5.371	0.0041708	0.41708			11.5	0.00424929	0.424929
	5.371	0.00683654	0.683654		19.4	0.00684292	0.684292			5.371	0.00436941	0.436941			11.7	0.00445164	0.445164
	5.371	0.0071473	0.71473		19.5	0.00715397	0.715397			5.371	0.00456802	0.456802			11.9	0.00465399	0.465399
	5.432	0.00745805	0.745805		19.5	0.00746501	0.746501			5.371	0.00476663	0.476663			11.9	0.00485633	0.485633
	5.432	0.0077688	0.77688		19.8	0.00777605	0.777605			5.371	0.00496524	0.496524			12.1	0.00505868	0.505868
	5.432	0.00807955	0.807955		19.9	0.00808709	0.808709			5.432	0.00516385	0.516385			12.4	0.00526103	0.526103
	5.432	0.0083903	0.83903		19.9	0.00839813	0.839813			5.432	0.00536246	0.536246			12.4	0.00546338	0.546338
	5.432	0.00870106	0.870106		20.1	0.00870918	0.870918			5.432	0.00556107	0.556107			13.1	0.00566572	0.566572
	5.432	0.00901181	0.901181		20.1	0.00902022	0.902022			5.432	0.00575968	0.575968			13.2	0.00586807	0.586807
	5.493	0.00932256	0.932256		20.2	0.00933126	0.933126			5.432	0.00595829	0.595829			13.5	0.00607042	0.607042
	5.493	0.00963331	0.963331		20.2	0.0096423	0.96423			5.432	0.0061569	0.61569			13.6	0.00627276	0.627276
	5.493	0.00994406	0.994406		20.9	0.00995334	0.995334			5.432	0.00635551	0.635551			13.7	0.00647511	0.647511
	5.554	0.0102548	1.02548		21.5	0.0102644	1.02644			5.493	0.00655412	0.655412			13.9	0.00667746	0.667746
	5.554	0.0105656	1.05656		21.8	0.0105754	1.05754			5.493	0.00675273	0.675273			14	0.00687981	0.687981
	5.554	0.0108763	1.08763		21.8	0.0108865	1.08865			5.493	0.00695134	0.695134			14.2	0.00708215	0.708215
	5.615	0.0111871	1.11871		22	0.0111975	1.11975			5.493	0.00714995	0.714995			14.3	0.0072845	0.72845
	5.615	0.0114978	1.14978		22.2	0.0115086	1.15086			5.554	0.00734856	0.734856			14.5	0.00748685	0.748685
	5.615	0.0118086	1.18086		22.3	0.0118196	1.18196			5.554	0.00754717	0.754717			14.7	0.00768919	0.768919
	5.615	0.0121193	1.21193		22.5	0.0121306	1.21306			5.554	0.00774578	0.774578			15	0.00789154	0.789154
	5.615	0.0124301	1.24301		23.1	0.0124417	1.24417			5.554	0.00794439	0.794439			15	0.00809389	0.809389
	5.615	0.0127408	1.27408		23.5	0.0127527	1.27527			5.554	0.008143	0.8143			15	0.00829624	0.829624
	5.615	0.0130516	1.30516		23.7	0.0130638	1.30638			5.554	0.00834161	0.834161			15.1	0.00849858	0.849858
	5.615	0.0133623	1.33623		23.7	0.0133748	1.33748			5.554	0.00854022	0.854022			15.2	0.00870093	0.870093
	5.676	0.0136731	1.36731		23.7	0.0136858	1.36858			5.554	0.00873883	0.873883			15.2	0.00890328	0.890328
	5.676	0.0139838	1.39838		23.8	0.0139969	1.39969			5.615	0.00893744	0.893744			15.3	0.00910563	0.910563
	5.676	0.0142946	1.42946		23.8	0.0143079	1.43079			5.615	0.00913605	0.913605			15.3	0.00930797	0.930797
	5.676	0.0146053	1.46053		23.9	0.014619	1.4619			5.615	0.00933466	0.933466			15.4	0.00951032	0.951032
	5.676	0.0149161	1.49161		24.3	0.01493	1.493			5.615	0.00953327	0.953327			15.4	0.00971267	0.971267
	5.676	0.0152268	1.52268		24.3	0.0152411	1.52411			5.615	0.00973188	0.973188			15.5	0.00991501	0.991501
	5.737	0.0155376	1.55376		24.5	0.0155521	1.55521			5.615	0.00993049	0.993049			15.5	0.0101174	1.01174
	5.737	0.0158484	1.58484		25	0.0158631	1.58631			5.615	0.0101291	1.01291			15.8	0.0103197	1.03197
	5.737	0.0161591	1.61591		25.4	0.0161742	1.61742			5.615	0.0103277	1.03277			15.8	0.0105221	1.05221
	5.737	0.0164699	1.64699		25.4	0.0164852	1.64852			5.676	0.0105263	1.05263			15.8	0.0107244	1.07244
	5.737	0.0167806	1.67806		25.5	0.0167963	1.67963			5.676	0.0107249	1.07249			15.8	0.0109268	1.09268
	5.798	0.0170914	1.70914		25.7	0.0171073	1.71073			5.676	0.0109235	1.09235			15.9	0.0111291	1.11291
	5.798	0.0174021	1.74021		25.8	0.0174184	1.74184			5.676	0.0111221	1.11221			16.2	0.0113314	1.13314
	5.859	0.0177129	1.77129		25.8	0.0177294	1.77294			5.676	0.0113208	1.13208			16.3	0.0115338	1.15338
	5.859	0.0180236	1.80236		25.8	0.0180404	1.80404			5.737	0.0115194	1.15194			16.4	0.0117361	1.17361
	5.859	0.0183344	1.83344		25.9	0.0183515	1.83515			5.737	0.011718	1.1718			16.4	0.0119385	1.19385
	5.859	0.0186451	1.86451		26.1	0.0186625	1.86625			5.737	0.0119166	1.19166			16.5	0.0121408	1.21408
	5.859	0.0189559	1.89559		26.4	0.0189736	1.89736			5.737	0.0121152	1.21152			16.6	0.0123432	1.23432
	5.859	0.0192666	1.92666		26.8	0.0192846	1.92846			5.737	0.0123138	1.23138			16.8	0.0125455	1.25455
	5.859	0.0195774	1.95774		27.4	0.0195956	1.95956			5.737	0.0125124	1.25124			17	0.0127479	1.27479
	5.92	0.0198881	1.98881		27.5	0.0199067	1.99067			5.737	0.012711	1.2711			17	0.0129502	1.29502
	5.92	0.0201989	2.01989		27.5	0.0202177	2.02177			5.737	0.0129096	1.29096			17.2	0.0131526	1.31526
	5.92	0.0205096	2.05096		28.2	0.0205288	2.05288			5.737	0.0131082	1.31082			17.3	0.0133549	1.33549
	5.92	0.0208204	2.08204		28.6	0.0208398	2.08398			5.798	0.0133069	1.33069			17.4	0.0135573	1.35573
	5.92	0.0211311	2.11311		28.7	0.0211509	2.11509			5.798	0.0135055	1.35055			17.5	0.0137596	1.37596
	5.92	0.0214419	2.14419		28.7	0.0214619	2.14619			5.798	0.0137041	1.37041			17.7	0.013962	1.3962
	5.92	0.0217526	2.17526		28.7	0.0217729	2.17729			5.798	0.0139027	1.39027			17.8	0.0141643	1.41643
	5.92	0.0220634	2.20634		29.1	0.022084	2.2084			5.798	0.0141013	1.41013			18.1	0.0143667	1.43667
	5.92	0.0223741	2.23741		29.2	0.022395	2.2395			5.798	0.0142999	1.42999			18.1	0.014569	1.4569
	5.981	0.0226849	2.26849		29.4	0.0227061	2.27061			5.798	0.0144985	1.44985			18.3	0.0147713	1.47713
	5.981	0.0229956	2.29956		29.7	0.0230171	2.30171			5.798	0.0146971	1.46971			18.3	0.0149737	1.49737
	5.981	0.0233064	2.33064		29.9	0.0233281	2.33281			5.798	0.0148957	1.48957			18.3	0.015176	1.5176
	5.981	0.0236172	2.36172		30.3	0.0236392	2.36392			5.859	0.0150943	1.50943			18.3	0.0153784	1.53784
	5.981	0.0239279	2.39279		30.3	0.0239502	2.39502			5.859	0.0152929	1.52929			18.4	0.0155807	1.55807
	6.042	0.0242387	2.42387		30.4	0.0242613	2.42613			5.859	0.0154916	1.54916			18.5	0.0157831	1.57831
	6.042	0.0245494	2.45494		30.5	0.0245723	2.45723			5.859	0.0156902	1.56902			18.5	0.0159854	1.59854
	6.042	0.0248602	2.48602		30.7	0.0248834	2.48834			5.859	0.0158888	1.58888			18.5	0.0161878	1.61878
	6.042	0.0251709	2.51709		31.1	0.0251944	2.51944			5.859	0.0160874	1.60874			18.7	0.0163901	1.63901
	6.042	0.0254817	2.54817		31.1	0.0255054	2.55054			5.859	0.016286	1.6286			18.7	0.0165925	1.65925
	6.104	0.0257924	2.57924		31.2	0.0258165	2.58165			5.92	0.0164846	1.64846			18.8	0.0167948	1.67948
	6.104	0.0261032	2.61032		31.3	0.0261275	2.61275			5.92	0.0166832	1.66832			18.9	0.0169972	1.69972
	6.104	0.0264139	2.64139		31.4	0.0264386	2.64386			5.92	0.0168818	1.68818			19	0.0171995	1.71995
	6.165	0.0267247	2.67247		31.5	0.0267496	2.67496			5.92	0.0170804	1.70804			19.2	0.0174019	1.74019
	6.165	0.0270354	2.70354		31.5	0.0270607	2.70607			5.92	0.017279	1.7279			19.3	0.0176042	1.76042
	6.165	0.0273462	2.73462		32	0.0273717	2.73717			5.92	0.0174777	1.74777			19.4	0.0178066	1.78066
	6.165	0.0276569	2.76569		32	0.0276827	2.76827			5.92	0.0176763	1.76763			19.4	0.0180089	1.80089
	6.165	0.0279677	2.79677		32	0.0279938	2.79938			5.92	0.0178749	1.78749			19.4	0.0182113	1.82113
	6.165	0.0282784	2.82784		32.2	0.0283048	2.83048			5.92	0.0180735	1.80735			19.5	0.0184136	1.84136
	6.165	0.0285892	2.85892		32.2	0.0286159	2.86159			5.92	0.0182721	1.82721			19.5	0.0186159	1.86159
	6.226	0.0288999	2.88999		32.3	0.0289269	2.89269			5.92	0.0184707	1.84707			19.8	0.0188183	1.88183
	6.226	0.0292107	2.92107		32.5	0.0292379	2.92379			5.92	0.0186693	1.86693			19.8	0.0190206	1.90206
	6.226	0.0295214	2.95214		32.5	0.029549	2.9549			5.92	0.0188679	1.88679			20	0.019223	1.9223
	6.226	0.0298322	2.98322		32.8	0.02986	2.986			5.92	0.0190665	1.90665			20	0.0194253	1.94253
	6.226	0.0301429	3.01429		33	0.0301711	3.01711			5.92	0.0192651	1.92651			20.2	0.0196277	1.96277
	6.226	0.0304537	3.04537		33.5	0.0304821	3.04821			5.92	0.0194638	1.94638			20.2	0.01983	1.983
	6.226	0.0307644	3.07644		33.5	0.0307932	3.07932			5.92	0.0196624	1.96624			20.2	0.0200324	2.00324
	6.226	0.0310752	3.10752		34.2	0.0311042	3.11042			5.92	0.019861	1.9861			20.2	0.0202347	2.02347
	6.226	0.031386	3.1386		34.3	0.0314152	3.14152			5.981	0.0200596	2.00596			20.3	0.0204371	2.04371
	6.287	0.0316967	3.16967		34.5	0.0317263	3.17263			5.981	0.0202582	2.02582			20.3	0.0206394	2.06394
	6.287	0.0320075	3.20075		35.1	0.0320373	3.20373			5.981	0.0204568	2.04568			20.4	0.0208418	2.08418
	6.287	0.0323182	3.23182		35.2	0.0323484	3.23484			5.981	0.0206554	2.06554			20.5	0.0210441	2.10441
	6.287	0.032629	3.2629		35.4	0.0326594	3.26594			5.981	0.020854	2.0854			20.6	0.0212465	2.12465
	6.287	0.0329397	3.29397		35.5	0.0329705	3.29705			5.981	0.0210526	2.10526			20.6	0.0214488	2.14488
	6.348	0.0332505	3.32505		35.9	0.0332815	3.32815			5.981	0.0212512	2.12512			20.8	0.0216512	2.16512
	6.348	0.0335612	3.35612		36.1	0.0335925	3.35925			5.981	0.0214499	2.14499			20.8	0.0218535	2.18535
	6.348	0.033872	3.3872		36.3	0.0339036	3.39036			5.981	0.0216485	2.16485			21	0.0220558	2.20558
	6.348	0.0341827	3.41827		36.5	0.0342146	3.42146			5.981	0.0218471	2.18471			21.1	0.0222582	2.22582
	6.348	0.0344935	3.44935		36.6	0.0345257	3.45257			5.981	0.0220457	2.20457			21.1	0.0224605	2.24605
	6.348	0.0348042	3.48042		36.9	0.0348367	3.48367			5.981	0.0222443	2.22443			21.1	0.0226629	2.26629
	6.348	0.035115	3.5115		36.9	0.0351477	3.51477			5.981	0.0224429	2.24429			21.6	0.0228652	2.28652
	6.348	0.0354257	3.54257		37	0.0354588	3.54588			5.981	0.0226415	2.26415			21.8	0.0230676	2.30676
	6.348	0.0357365	3.57365		37.1	0.0357698	3.57698			5.981	0.0228401	2.28401			21.9	0.0232699	2.32699
	6.348	0.0360472	3.60472		37.2	0.0360809	3.60809			5.981	0.0230387	2.30387			21.9	0.0234723	2.34723
	6.348	0.036358	3.6358		37.3	0.0363919	3.63919			6.042	0.0232373	2.32373			21.9	0.0236746	2.36746
	6.348	0.0366687	3.66687		37.3	0.036703	3.6703			6.042	0.0234359	2.34359			22	0.023877	2.3877
	6.348	0.0369795	3.69795		37.4	0.037014	3.7014			6.042	0.0236346	2.36346			22.1	0.0240793	2.40793
	6.409	0.0372902	3.72902		37.5	0.037325	3.7325			6.042	0.0238332	2.38332			22.7	0.0242817	2.42817
	6.409	0.037601	3.7601		37.7	0.0376361	3.76361			6.042	0.0240318	2.40318			22.8	0.024484	2.4484
	6.409	0.0379117	3.79117		37.7	0.0379471	3.79471			6.042	0.0242304	2.42304			22.8	0.0246864	2.46864
	6.409	0.0382225	3.82225		37.9	0.0382582	3.82582			6.042	0.024429	2.4429			22.9	0.0248887	2.48887
	6.409	0.0385333	3.85333		38.1	0.0385692	3.85692			6.042	0.0246276	2.46276			22.9	0.0250911	2.50911
	6.409	0.038844	3.8844		38.2	0.0388802	3.88802			6.042	0.0248262	2.48262			22.9	0.0252934	2.52934
	6.409	0.0391548	3.91548		38.9	0.0391913	3.91913			6.042	0.0250248	2.50248			23	0.0254958	2.54958
	6.409	0.0394655	3.94655		39.2	0.0395023	3.95023			6.042	0.0252234	2.52234			23	0.0256981	2.56981
	6.409	0.0397763	3.97763		39.5	0.0398134	3.98134			6.104	0.025422	2.5422			23	0.0259004	2.59004
	6.409	0.040087	4.0087		39.5	0.0401244	4.01244			6.104	0.0256207	2.56207			23.1	0.0261028	2.61028
	6.47	0.0403978	4.03978		39.7	0.0404355	4.04355			6.104	0.0258193	2.58193			23.1	0.0263051	2.63051
	6.47	0.0407085	4.07085		39.8	0.0407465	4.07465			6.104	0.0260179	2.60179			23.2	0.0265075	2.65075
	6.47	0.0410193	4.10193		40	0.0410575	4.10575			6.104	0.0262165	2.62165			23.2	0.0267098	2.67098
	6.47	0.04133	4.133		40.2	0.0413686	4.13686			6.104	0.0264151	2.64151			23.2	0.0269122	2.69122
	6.47	0.0416408	4.16408		40.2	0.0416796	4.16796			6.104	0.0266137	2.66137			23.3	0.0271145	2.71145
	6.531	0.0419515	4.19515		40.6	0.0419907	4.19907			6.104	0.0268123	2.68123			23.4	0.0273169	2.73169
	6.531	0.0422623	4.22623		40.8	0.0423017	4.23017			6.104	0.0270109	2.70109			23.6	0.0275192	2.75192
	6.531	0.042573	4.2573		40.9	0.0426128	4.26128			6.104	0.0272095	2.72095			23.7	0.0277216	2.77216
	6.531	0.0428838	4.28838		41.1	0.0429238	4.29238			6.165	0.0274081	2.74081			23.7	0.0279239	2.79239
	6.531	0.0431945	4.31945		41.2	0.0432348	4.32348			6.165	0.0276068	2.76068			23.8	0.0281263	2.81263
	6.592	0.0435053	4.35053		41.3	0.0435459	4.35459			6.165	0.0278054	2.78054			23.8	0.0283286	2.83286
	6.592	0.043816	4.3816		41.4	0.0438569	4.38569			6.165	0.028004	2.8004			23.8	0.028531	2.8531
	6.592	0.0441268	4.41268		41.5	0.044168	4.4168			6.165	0.0282026	2.82026			23.8	0.0287333	2.87333
	6.592	0.0444375	4.44375		42	0.044479	4.4479			6.165	0.0284012	2.84012			23.9	0.0289357	2.89357
	6.592	0.0447483	4.47483		42	0.04479	4.479			6.165	0.0285998	2.85998			23.9	0.029138	2.9138
	6.592	0.045059	4.5059		42	0.0451011	4.51011			6.165	0.0287984	2.87984			24	0.0293403	2.93403
	6.592	0.0453698	4.53698		42.1	0.0454121	4.54121			6.165	0.028997	2.8997			24.1	0.0295427	2.95427
	6.592	0.0456805	4.56805		42.3	0.0457232	4.57232			6.165	0.0291956	2.91956			24.1	0.029745	2.9745
	6.592	0.0459913	4.59913		42.6	0.0460342	4.60342			6.165	0.0293942	2.93942			24.1	0.0299474	2.99474
	6.592	0.0463021	4.63021		42.6	0.0463453	4.63453			6.165	0.0295929	2.95929			24.1	0.0301497	3.01497
	6.592	0.0466128	4.66128		42.7	0.0466563	4.66563			6.165	0.0297915	2.97915			24.2	0.0303521	3.03521
	6.592	0.0469236	4.69236		42.8	0.0469673	4.69673			6.165	0.0299901	2.99901			24.3	0.0305544	3.05544
	6.592	0.0472343	4.72343		43.2	0.0472784	4.72784			6.165	0.0301887	3.01887			24.4	0.0307568	3.07568
	6.592	0.0475451	4.75451		43.3	0.0475894	4.75894			6.165	0.0303873	3.03873			24.6	0.0309591	3.09591
	6.592	0.0478558	4.78558		43.5	0.0479005	4.79005			6.226	0.0305859	3.05859			24.7	0.0311615	3.11615
	6.653	0.0481666	4.81666		44.3	0.0482115	4.82115			6.226	0.0307845	3.07845			24.7	0.0313638	3.13638
	6.653	0.0484773	4.84773		44.5	0.0485226	4.85226			6.226	0.0309831	3.09831			24.8	0.0315662	3.15662
	6.653	0.0487881	4.87881		44.7	0.0488336	4.88336			6.226	0.0311817	3.11817			24.9	0.0317685	3.17685
	6.653	0.0490988	4.90988		44.8	0.0491446	4.91446			6.226	0.0313803	3.13803			25	0.0319709	3.19709
	6.653	0.0494096	4.94096		45.1	0.0494557	4.94557			6.226	0.0315789	3.15789			25	0.0321732	3.21732
	6.653	0.0497203	4.97203		45.1	0.0497667	4.97667			6.226	0.0317776	3.17776			25	0.0323756	3.23756
	6.653	0.0500311	5.00311		45.5	0.0500778	5.00778			6.226	0.0319762	3.19762			25.2	0.0325779	3.25779
	6.653	0.0503418	5.03418		45.7	0.0503888	5.03888			6.226	0.0321748	3.21748			25.4	0.0327803	3.27803
	6.653	0.0506526	5.06526		46	0.0506998	5.06998			6.226	0.0323734	3.23734			25.4	0.0329826	3.29826
	6.653	0.0509633	5.09633		46	0.0510109	5.10109			6.226	0.032572	3.2572			25.6	0.0331849	3.31849
	6.714	0.0512741	5.12741		46.2	0.0513219	5.13219			6.226	0.0327706	3.27706			25.6	0.0333873	3.33873
	6.714	0.0515848	5.15848		46.4	0.051633	5.1633			6.226	0.0329692	3.29692			25.7	0.0335896	3.35896
	6.714	0.0518956	5.18956		46.6	0.051944	5.1944			6.226	0.0331678	3.31678			25.8	0.033792	3.3792
	6.714	0.0522063	5.22063		46.9	0.0522551	5.22551			6.226	0.0333664	3.33664			25.9	0.0339943	3.39943
	6.714	0.0525171	5.25171		47.5	0.0525661	5.25661			6.226	0.033565	3.3565			25.9	0.0341967	3.41967
	6.714	0.0528278	5.28278		47.7	0.0528771	5.28771			6.226	0.0337637	3.37637			25.9	0.034399	3.4399
	6.714	0.0531386	5.31386		47.8	0.0531882	5.31882			6.226	0.0339623	3.39623			25.9	0.0346014	3.46014
	6.714	0.0534493	5.34493		47.9	0.0534992	5.34992			6.287	0.0341609	3.41609			26	0.0348037	3.48037
	6.714	0.0537601	5.37601		48	0.0538103	5.38103			6.287	0.0343595	3.43595			26	0.0350061	3.50061
	6.714	0.0540709	5.40709		48.1	0.0541213	5.41213			6.287	0.0345581	3.45581			26.1	0.0352084	3.52084
	6.714	0.0543816	5.43816		48.2	0.0544323	5.44323			6.287	0.0347567	3.47567			26.2	0.0354108	3.54108
	6.714	0.0546924	5.46924		48.3	0.0547434	5.47434			6.287	0.0349553	3.49553			26.3	0.0356131	3.56131
	6.775	0.0550031	5.50031		48.7	0.0550544	5.50544			6.287	0.0351539	3.51539			26.3	0.0358155	3.58155
	6.775	0.0553139	5.53139		48.8	0.0553655	5.53655			6.287	0.0353525	3.53525			26.4	0.0360178	3.60178
	6.775	0.0556246	5.56246		48.9	0.0556765	5.56765			6.287	0.0355511	3.55511			26.6	0.0362202	3.62202
	6.775	0.0559354	5.59354		48.9	0.0559876	5.59876			6.287	0.0357498	3.57498			26.7	0.0364225	3.64225
	6.775	0.0562461	5.62461		49	0.0562986	5.62986			6.287	0.0359484	3.59484			26.8	0.0366248	3.66248
	6.836	0.0565569	5.65569		49.1	0.0566096	5.66096			6.287	0.036147	3.6147			26.9	0.0368272	3.68272
	6.836	0.0568676	5.68676		49.1	0.0569207	5.69207			6.287	0.0363456	3.63456			27	0.0370295	3.70295
	6.836	0.0571784	5.71784		49.2	0.0572317	5.72317			6.287	0.0365442	3.65442			27	0.0372319	3.72319
	6.836	0.0574891	5.74891		49.3	0.0575428	5.75428			6.287	0.0367428	3.67428			27	0.0374342	3.74342
	6.836	0.0577999	5.77999		49.4	0.0578538	5.78538			6.287	0.0369414	3.69414			27.1	0.0376366	3.76366
	6.836	0.0581106	5.81106		49.5	0.0581649	5.81649			6.287	0.03714	3.714			27.1	0.0378389	3.78389
	6.836	0.0584214	5.84214		49.5	0.0584759	5.84759			6.287	0.0373386	3.73386			27.1	0.0380413	3.80413
	6.836	0.0587321	5.87321		50	0.0587869	5.87869			6.287	0.0375372	3.75372			27.1	0.0382436	3.82436
	6.836	0.0590429	5.90429		50.2	0.059098	5.9098			6.287	0.0377358	3.77358			27.1	0.038446	3.8446
	6.836	0.0593536	5.93536		50.2	0.059409	5.9409			6.287	0.0379345	3.79345			27.1	0.0386483	3.86483
	6.836	0.0596644	5.96644		50.5	0.0597201	5.97201			6.287	0.0381331	3.81331			27.1	0.0388507	3.88507
	6.836	0.0599751	5.99751		50.5	0.0600311	6.00311			6.287	0.0383317	3.83317			27.2	0.039053	3.9053
	6.836	0.0602859	6.02859		50.6	0.0603421	6.03421			6.348	0.0385303	3.85303			27.2	0.0392554	3.92554
	6.836	0.0605966	6.05966		50.6	0.0606532	6.06532			6.348	0.0387289	3.87289			27.3	0.0394577	3.94577
	6.897	0.0609074	6.09074		50.7	0.0609642	6.09642			6.348	0.0389275	3.89275			27.4	0.0396601	3.96601
	6.897	0.0612181	6.12181		50.8	0.0612753	6.12753			6.348	0.0391261	3.91261			27.5	0.0398624	3.98624
	6.897	0.0615289	6.15289		50.9	0.0615863	6.15863			6.348	0.0393247	3.93247			27.6	0.0400648	4.00648
	6.897	0.0618397	6.18397		50.9	0.0618974	6.18974			6.348	0.0395233	3.95233			27.6	0.0402671	4.02671
	6.897	0.0621504	6.21504		51.1	0.0622084	6.22084			6.348	0.0397219	3.97219			27.6	0.0404694	4.04694
	6.897	0.0624612	6.24612		51.3	0.0625194	6.25194			6.348	0.0399206	3.99206			27.9	0.0406718	4.06718
	6.897	0.0627719	6.27719		51.8	0.0628305	6.28305			6.348	0.0401192	4.01192			27.9	0.0408741	4.08741
	6.897	0.0630827	6.30827		51.8	0.0631415	6.31415			6.348	0.0403178	4.03178			27.9	0.0410765	4.10765
	6.897	0.0633934	6.33934		52	0.0634526	6.34526			6.348	0.0405164	4.05164			27.9	0.0412788	4.12788
	6.897	0.0637042	6.37042		52.2	0.0637636	6.37636			6.348	0.040715	4.0715			28	0.0414812	4.14812
	6.897	0.0640149	6.40149		52.4	0.0640747	6.40747			6.348	0.0409136	4.09136			28.1	0.0416835	4.16835
	6.897	0.0643257	6.43257		52.9	0.0643857	6.43857			6.348	0.0411122	4.11122			28.1	0.0418859	4.18859
	6.897	0.0646364	6.46364		53.1	0.0646967	6.46967			6.348	0.0413108	4.13108			28.2	0.0420882	4.20882
	6.958	0.0649472	6.49472		53.1	0.0650078	6.50078			6.348	0.0415094	4.15094			28.3	0.0422906	4.22906
	6.958	0.0652579	6.52579		53.1	0.0653188	6.53188			6.348	0.041708	4.1708			28.4	0.0424929	4.24929
	6.958	0.0655687	6.55687		53.4	0.0656299	6.56299			6.348	0.0419067	4.19067			28.5	0.0426953	4.26953
	6.958	0.0658794	6.58794		53.5	0.0659409	6.59409			6.348	0.0421053	4.21053			28.5	0.0428976	4.28976
	6.958	0.0661902	6.61902		53.5	0.0662519	6.62519			6.348	0.0423039	4.23039			28.5	0.0431	4.31
	6.958	0.0665009	6.65009		53.6	0.066563	6.6563			6.348	0.0425025	4.25025			28.7	0.0433023	4.33023
	6.958	0.0668117	6.68117		53.6	0.066874	6.6874			6.348	0.0427011	4.27011			29	0.0435047	4.35047
	6.958	0.0671224	6.71224		53.8	0.0671851	6.71851			6.348	0.0428997	4.28997			29	0.043707	4.3707
	6.958	0.0674332	6.74332		54.2	0.0674961	6.74961			6.348	0.0430983	4.30983			29	0.0439093	4.39093
	7.019	0.0677439	6.77439		54.2	0.0678072	6.78072			6.409	0.0432969	4.32969			29	0.0441117	4.41117
	7.019	0.0680547	6.80547		54.5	0.0681182	6.81182			6.409	0.0434955	4.34955			29.2	0.044314	4.4314
	7.019	0.0683654	6.83654		54.9	0.0684292	6.84292			6.409	0.0436941	4.36941			29.2	0.0445164	4.45164
	7.019	0.0686762	6.86762		54.9	0.0687403	6.87403			6.409	0.0438928	4.38928			29.3	0.0447187	4.47187
	7.019	0.0689869	6.89869		54.9	0.0690513	6.90513			6.409	0.0440914	4.40914			29.4	0.0449211	4.49211
	7.019	0.0692977	6.92977		55.5	0.0693624	6.93624			6.409	0.04429	4.429			29.6	0.0451234	4.51234
	7.019	0.0696085	6.96085		55.6	0.0696734	6.96734			6.409	0.0444886	4.44886			29.7	0.0453258	4.53258
	7.019	0.0699192	6.99192		55.7	0.0699844	6.99844			6.409	0.0446872	4.46872			29.7	0.0455281	4.55281
	7.019	0.07023	7.023		55.7	0.0702955	7.02955			6.409	0.0448858	4.48858			29.7	0.0457305	4.57305
	7.019	0.0705407	7.05407		56	0.0706065	7.06065			6.47	0.0450844	4.50844			29.7	0.0459328	4.59328
	7.019	0.0708515	7.08515		56.1	0.0709176	7.09176			6.47	0.045283	4.5283			29.8	0.0461352	4.61352
	7.019	0.0711622	7.11622		56.4	0.0712286	7.12286			6.47	0.0454816	4.54816			30	0.0463375	4.63375
	7.019	0.071473	7.1473		56.4	0.0715397	7.15397			6.47	0.0456802	4.56802			30	0.0465399	4.65399
	7.019	0.0717837	7.17837		56.5	0.0718507	7.18507			6.47	0.0458788	4.58788			30	0.0467422	4.67422
	7.019	0.0720945	7.20945		56.8	0.0721617	7.21617			6.47	0.0460775	4.60775			30.1	0.0469446	4.69446
	7.019	0.0724052	7.24052		56.9	0.0724728	7.24728			6.47	0.0462761	4.62761			30.1	0.0471469	4.71469
	7.08	0.072716	7.2716		57.1	0.0727838	7.27838			6.47	0.0464747	4.64747			30.1	0.0473493	4.73493
	7.08	0.0730267	7.30267		57.1	0.0730949	7.30949			6.47	0.0466733	4.66733			30.2	0.0475516	4.75516
	7.08	0.0733375	7.33375		57.5	0.0734059	7.34059			6.47	0.0468719	4.68719			30.3	0.0477539	4.77539
	7.08	0.0736482	7.36482		57.9	0.073717	7.3717			6.47	0.0470705	4.70705			30.3	0.0479563	4.79563
	7.08	0.073959	7.3959		58	0.074028	7.4028			6.47	0.0472691	4.72691			30.4	0.0481586	4.81586
	7.08	0.0742697	7.42697		58	0.074339	7.4339			6.47	0.0474677	4.74677			30.6	0.048361	4.8361
	7.08	0.0745805	7.45805		58	0.0746501	7.46501			6.47	0.0476663	4.76663			30.6	0.0485633	4.85633
	7.08	0.0748912	7.48912		58.2	0.0749611	7.49611			6.47	0.0478649	4.78649			30.8	0.0487657	4.87657
	7.141	0.075202	7.5202		58.5	0.0752722	7.52722			6.47	0.0480636	4.80636			30.8	0.048968	4.8968
	7.141	0.0755127	7.55127		58.8	0.0755832	7.55832			6.47	0.0482622	4.82622			30.9	0.0491704	4.91704
	7.141	0.0758235	7.58235		59.8	0.0758942	7.58942			6.47	0.0484608	4.84608			30.9	0.0493727	4.93727
	7.141	0.0761342	7.61342		60	0.0762053	7.62053			6.47	0.0486594	4.86594			30.9	0.0495751	4.95751
	7.141	0.076445	7.6445		60.1	0.0765163	7.65163			6.47	0.048858	4.8858			31.2	0.0497774	4.97774
	7.141	0.0767557	7.67557		60.3	0.0768274	7.68274			6.47	0.0490566	4.90566			31.2	0.0499798	4.99798
	7.141	0.0770665	7.70665		60.4	0.0771384	7.71384			6.47	0.0492552	4.92552			31.3	0.0501821	5.01821
	7.141	0.0773773	7.73773		60.4	0.0774495	7.74495			6.531	0.0494538	4.94538			31.3	0.0503845	5.03845
	7.141	0.077688	7.7688		60.5	0.0777605	7.77605			6.531	0.0496524	4.96524			31.3	0.0505868	5.05868
	7.141	0.0779988	7.79988		60.7	0.0780715	7.80715			6.531	0.049851	4.9851			31.3	0.0507892	5.07892
	7.141	0.0783095	7.83095		60.9	0.0783826	7.83826			6.531	0.0500497	5.00497			31.4	0.0509915	5.09915
	7.141	0.0786203	7.86203		60.9	0.0786936	7.86936			6.531	0.0502483	5.02483			31.4	0.0511938	5.11938
	7.141	0.078931	7.8931		61	0.0790047	7.90047			6.531	0.0504469	5.04469			31.5	0.0513962	5.13962
	7.141	0.0792418	7.92418		61	0.0793157	7.93157			6.531	0.0506455	5.06455			31.5	0.0515985	5.15985
	7.141	0.0795525	7.95525		61.2	0.0796267	7.96267			6.531	0.0508441	5.08441			31.5	0.0518009	5.18009
	7.141	0.0798633	7.98633		61.3	0.0799378	7.99378			6.531	0.0510427	5.10427			31.6	0.0520032	5.20032
	7.141	0.080174	8.0174		61.4	0.0802488	8.02488			6.531	0.0512413	5.12413			31.7	0.0522056	5.22056
	7.202	0.0804848	8.04848		61.5	0.0805599	8.05599			6.531	0.0514399	5.14399			31.7	0.0524079	5.24079
	7.202	0.0807955	8.07955		61.5	0.0808709	8.08709			6.531	0.0516385	5.16385			31.7	0.0526103	5.26103
	7.202	0.0811063	8.11063		61.6	0.081182	8.1182			6.531	0.0518371	5.18371			31.7	0.0528126	5.28126
	7.202	0.081417	8.1417		62.2	0.081493	8.1493			6.531	0.0520357	5.20357			31.8	0.053015	5.3015
	7.202	0.0817278	8.17278		62.2	0.081804	8.1804			6.531	0.0522344	5.22344			31.8	0.0532173	5.32173
	7.202	0.0820385	8.20385		62.2	0.0821151	8.21151			6.531	0.052433	5.2433			32	0.0534197	5.34197
	7.202	0.0823493	8.23493		62.4	0.0824261	8.24261			6.531	0.0526316	5.26316			32	0.053622	5.3622
	7.202	0.08266	8.266		62.7	0.0827372	8.27372			6.531	0.0528302	5.28302			32.1	0.0538244	5.38244
	7.202	0.0829708	8.29708		62.9	0.0830482	8.30482			6.531	0.0530288	5.30288			32.1	0.0540267	5.40267
	7.202	0.0832815	8.32815		62.9	0.0833593	8.33593			6.531	0.0532274	5.32274			32.5	0.0542291	5.42291
	7.202	0.0835923	8.35923		63.1	0.0836703	8.36703			6.531	0.053426	5.3426			32.7	0.0544314	5.44314
	7.202	0.083903	8.3903		63.1	0.0839813	8.39813			6.531	0.0536246	5.36246			32.7	0.0546338	5.46338
	7.202	0.0842138	8.42138		63.5	0.0842924	8.42924			6.531	0.0538232	5.38232			32.8	0.0548361	5.48361
	7.263	0.0845245	8.45245		63.9	0.0846034	8.46034			6.531	0.0540218	5.40218			32.8	0.0550384	5.50384
	7.263	0.0848353	8.48353		64.1	0.0849145	8.49145			6.531	0.0542205	5.42205			33	0.0552408	5.52408
	7.263	0.0851461	8.51461		64.4	0.0852255	8.52255			6.531	0.0544191	5.44191			33	0.0554431	5.54431
	7.263	0.0854568	8.54568		64.5	0.0855365	8.55365			6.592	0.0546177	5.46177			33.1	0.0556455	5.56455
	7.263	0.0857676	8.57676		64.5	0.0858476	8.58476			6.592	0.0548163	5.48163			33.2	0.0558478	5.58478
	7.263	0.0860783	8.60783		64.8	0.0861586	8.61586			6.592	0.0550149	5.50149			33.3	0.0560502	5.60502
	7.263	0.0863891	8.63891		65.3	0.0864697	8.64697			6.592	0.0552135	5.52135			33.3	0.0562525	5.62525
	7.263	0.0866998	8.66998		65.6	0.0867807	8.67807			6.592	0.0554121	5.54121			33.3	0.0564549	5.64549
	7.263	0.0870106	8.70106		65.8	0.0870918	8.70918			6.592	0.0556107	5.56107			33.3	0.0566572	5.66572
	7.263	0.0873213	8.73213		65.9	0.0874028	8.74028			6.592	0.0558093	5.58093			33.4	0.0568596	5.68596
	7.263	0.0876321	8.76321		65.9	0.0877138	8.77138			6.592	0.0560079	5.60079			33.5	0.0570619	5.70619
	7.263	0.0879428	8.79428		66.1	0.0880249	8.80249			6.592	0.0562066	5.62066			33.5	0.0572643	5.72643
	7.263	0.0882536	8.82536		66.5	0.0883359	8.83359			6.592	0.0564052	5.64052			33.6	0.0574666	5.74666
	7.263	0.0885643	8.85643		66.5	0.088647	8.8647			6.592	0.0566038	5.66038			33.7	0.057669	5.7669
	7.263	0.0888751	8.88751		66.7	0.088958	8.8958			6.592	0.0568024	5.68024			33.7	0.0578713	5.78713
	7.263	0.0891858	8.91858		66.8	0.0892691	8.92691			6.592	0.057001	5.7001			33.7	0.0580737	5.80737
	7.263	0.0894966	8.94966		66.9	0.0895801	8.95801			6.592	0.0571996	5.71996			33.8	0.058276	5.8276
	7.263	0.0898073	8.98073		67.1	0.0898911	8.98911			6.592	0.0573982	5.73982			33.8	0.0584783	5.84783
	7.263	0.0901181	9.01181		67.2	0.0902022	9.02022			6.592	0.0575968	5.75968			33.9	0.0586807	5.86807
	7.324	0.0904288	9.04288		67.2	0.0905132	9.05132			6.592	0.0577954	5.77954			33.9	0.058883	5.8883
	7.324	0.0907396	9.07396		67.3	0.0908243	9.08243			6.592	0.057994	5.7994			33.9	0.0590854	5.90854
	7.324	0.0910503	9.10503		67.5	0.0911353	9.11353			6.592	0.0581927	5.81927			34	0.0592877	5.92877
	7.324	0.0913611	9.13611		67.7	0.0914463	9.14463			6.592	0.0583913	5.83913			34.2	0.0594901	5.94901
	7.324	0.0916718	9.16718		67.8	0.0917574	9.17574			6.592	0.0585899	5.85899			34.3	0.0596924	5.96924
	7.324	0.0919826	9.19826		67.8	0.0920684	9.20684			6.592	0.0587885	5.87885			34.4	0.0598948	5.98948
	7.324	0.0922933	9.22933		68	0.0923795	9.23795			6.592	0.0589871	5.89871			34.5	0.0600971	6.00971
	7.324	0.0926041	9.26041		68.1	0.0926905	9.26905			6.592	0.0591857	5.91857			34.5	0.0602995	6.02995
	7.324	0.0929149	9.29149		68.2	0.0930016	9.30016			6.592	0.0593843	5.93843			34.7	0.0605018	6.05018
	7.324	0.0932256	9.32256		69.1	0.0933126	9.33126			6.592	0.0595829	5.95829			34.8	0.0607042	6.07042
	7.324	0.0935364	9.35364		69.1	0.0936236	9.36236			6.592	0.0597815	5.97815			34.8	0.0609065	6.09065
	7.324	0.0938471	9.38471		69.2	0.0939347	9.39347			6.653	0.0599801	5.99801			34.9	0.0611089	6.11089
	7.324	0.0941579	9.41579		69.3	0.0942457	9.42457			6.653	0.0601787	6.01787			34.9	0.0613112	6.13112
	7.324	0.0944686	9.44686		69.4	0.0945568	9.45568			6.653	0.0603774	6.03774			35	0.0615136	6.15136
	7.324	0.0947794	9.47794		69.5	0.0948678	9.48678			6.653	0.060576	6.0576			35.1	0.0617159	6.17159
	7.324	0.0950901	9.50901		69.6	0.0951788	9.51788			6.653	0.0607746	6.07746			35.1	0.0619183	6.19183
	7.324	0.0954009	9.54009		69.8	0.0954899	9.54899			6.653	0.0609732	6.09732			35.1	0.0621206	6.21206
	7.324	0.0957116	9.57116		69.8	0.0958009	9.58009			6.653	0.0611718	6.11718			35.1	0.0623229	6.23229
	7.324	0.0960224	9.60224		69.8	0.096112	9.6112			6.653	0.0613704	6.13704			35.1	0.0625253	6.25253
	7.324	0.0963331	9.63331		69.8	0.096423	9.6423			6.653	0.061569	6.1569			35.1	0.0627276	6.27276
	7.385	0.0966439	9.66439		69.8	0.0967341	9.67341			6.653	0.0617676	6.17676			35.2	0.06293	6.293
	7.385	0.0969546	9.69546		70	0.0970451	9.70451			6.653	0.0619662	6.19662			35.2	0.0631323	6.31323
	7.385	0.0972654	9.72654		70.5	0.0973561	9.73561			6.653	0.0621648	6.21648			35.2	0.0633347	6.33347
	7.385	0.0975761	9.75761		70.6	0.0976672	9.76672			6.653	0.0623635	6.23635			35.3	0.063537	6.3537
	7.385	0.0978869	9.78869		71	0.0979782	9.79782			6.653	0.0625621	6.25621			35.3	0.0637394	6.37394
	7.385	0.0981976	9.81976		71.2	0.0982893	9.82893			6.653	0.0627607	6.27607			35.4	0.0639417	6.39417
	7.385	0.0985084	9.85084		71.2	0.0986003	9.86003			6.653	0.0629593	6.29593			35.5	0.0641441	6.41441
	7.385	0.0988191	9.88191		71.5	0.0989114	9.89114			6.653	0.0631579	6.31579			35.5	0.0643464	6.43464
	7.385	0.0991299	9.91299		72	0.0992224	9.92224			6.653	0.0633565	6.33565			35.5	0.0645488	6.45488
	7.385	0.0994406	9.94406		72.1	0.0995334	9.95334			6.653	0.0635551	6.35551			35.5	0.0647511	6.47511
	7.385	0.0997514	9.97514		72.2	0.0998445	9.98445			6.653	0.0637537	6.37537			35.5	0.0649535	6.49535
	7.385	0.100062	10.0062		72.2	0.100156	10.0156			6.653	0.0639523	6.39523			35.6	0.0651558	6.51558
	7.385	0.100373	10.0373		72.4	0.100467	10.0467			6.653	0.0641509	6.41509			35.6	0.0653582	6.53582
	7.385	0.100684	10.0684		72.5	0.100778	10.0778			6.653	0.0643496	6.43496			35.7	0.0655605	6.55605
	7.385	0.100994	10.0994		72.8	0.101089	10.1089			6.653	0.0645482	6.45482			35.7	0.0657628	6.57628
	7.385	0.101305	10.1305		73.1	0.1014	10.14			6.653	0.0647468	6.47468			35.8	0.0659652	6.59652
	7.385	0.101616	10.1616		73.2	0.101711	10.1711			6.653	0.0649454	6.49454			35.9	0.0661675	6.61675
	7.385	0.101927	10.1927		73.3	0.102022	10.2022			6.653	0.065144	6.5144			36.1	0.0663699	6.63699
	7.446	0.102237	10.2237		73.4	0.102333	10.2333			6.653	0.0653426	6.53426			36.1	0.0665722	6.65722
	7.446	0.102548	10.2548		73.5	0.102644	10.2644			6.653	0.0655412	6.55412			36.2	0.0667746	6.67746
	7.446	0.102859	10.2859		73.5	0.102955	10.2955			6.653	0.0657398	6.57398			36.2	0.0669769	6.69769
	7.446	0.10317	10.317		73.6	0.103266	10.3266			6.653	0.0659384	6.59384			36.2	0.0671793	6.71793
	7.446	0.10348	10.348		73.6	0.103577	10.3577			6.653	0.066137	6.6137			36.3	0.0673816	6.73816
	7.446	0.103791	10.3791		73.7	0.103888	10.3888			6.714	0.0663357	6.63357			36.3	0.067584	6.7584
	7.446	0.104102	10.4102		73.8	0.104199	10.4199			6.714	0.0665343	6.65343			36.5	0.0677863	6.77863
	7.446	0.104413	10.4413		73.8	0.10451	10.451			6.714	0.0667329	6.67329			36.5	0.0679887	6.79887
	7.446	0.104723	10.4723		74.7	0.104821	10.4821			6.714	0.0669315	6.69315			36.5	0.068191	6.8191
	7.446	0.105034	10.5034		74.9	0.105132	10.5132			6.714	0.0671301	6.71301			36.5	0.0683934	6.83934
	7.446	0.105345	10.5345		75	0.105443	10.5443			6.714	0.0673287	6.73287			36.5	0.0685957	6.85957
	7.446	0.105656	10.5656		75.3	0.105754	10.5754			6.714	0.0675273	6.75273			36.6	0.0687981	6.87981
	7.446	0.105966	10.5966		75.4	0.106065	10.6065			6.714	0.0677259	6.77259			36.6	0.0690004	6.90004
	7.446	0.106277	10.6277		75.5	0.106376	10.6376			6.714	0.0679245	6.79245			36.8	0.0692028	6.92028
	7.446	0.106588	10.6588		75.5	0.106687	10.6687			6.714	0.0681231	6.81231			36.8	0.0694051	6.94051
	7.446	0.106899	10.6899		75.5	0.106998	10.6998			6.714	0.0683217	6.83217			36.8	0.0696074	6.96074
	7.446	0.107209	10.7209		75.7	0.107309	10.7309			6.714	0.0685204	6.85204			36.8	0.0698098	6.98098
	7.446	0.10752	10.752		75.7	0.107621	10.7621			6.714	0.068719	6.8719			36.8	0.0700121	7.00121
	7.446	0.107831	10.7831		76	0.107932	10.7932			6.714	0.0689176	6.89176			37	0.0702145	7.02145
	7.446	0.108142	10.8142		76.5	0.108243	10.8243			6.714	0.0691162	6.91162			37	0.0704168	7.04168
	7.507	0.108452	10.8452		76.6	0.108554	10.8554			6.714	0.0693148	6.93148			37	0.0706192	7.06192
	7.507	0.108763	10.8763		76.7	0.108865	10.8865			6.714	0.0695134	6.95134			37	0.0708215	7.08215
	7.507	0.109074	10.9074		76.9	0.109176	10.9176			6.714	0.069712	6.9712			37	0.0710239	7.10239
	7.507	0.109385	10.9385		77.2	0.109487	10.9487			6.714	0.0699106	6.99106			37	0.0712262	7.12262
	7.507	0.109695	10.9695		77.4	0.109798	10.9798			6.714	0.0701092	7.01092			37.1	0.0714286	7.14286
	7.507	0.110006	11.0006		77.4	0.110109	11.0109			6.714	0.0703078	7.03078			37.1	0.0716309	7.16309
	7.507	0.110317	11.0317		77.7	0.11042	11.042			6.775	0.0705065	7.05065			37.3	0.0718333	7.18333
	7.507	0.110628	11.0628		78.1	0.110731	11.0731			6.775	0.0707051	7.07051			37.3	0.0720356	7.20356
	7.507	0.110938	11.0938		78.5	0.111042	11.1042			6.775	0.0709037	7.09037			37.3	0.072238	7.2238
	7.507	0.111249	11.1249		78.5	0.111353	11.1353			6.775	0.0711023	7.11023			37.5	0.0724403	7.24403
	7.507	0.11156	11.156		78.5	0.111664	11.1664			6.775	0.0713009	7.13009			37.5	0.0726427	7.26427
	7.507	0.111871	11.1871		78.7	0.111975	11.1975			6.775	0.0714995	7.14995			37.6	0.072845	7.2845
	7.507	0.112181	11.2181		78.7	0.112286	11.2286			6.775	0.0716981	7.16981			38	0.0730473	7.30473
	7.507	0.112492	11.2492		78.8	0.112597	11.2597			6.775	0.0718967	7.18967			38.1	0.0732497	7.32497
	7.507	0.112803	11.2803		78.9	0.112908	11.2908			6.775	0.0720953	7.20953			38.2	0.073452	7.3452
	7.507	0.113114	11.3114		79	0.113219	11.3219			6.775	0.0722939	7.22939			38.2	0.0736544	7.36544
	7.507	0.113424	11.3424		79.2	0.11353	11.353			6.775	0.0724926	7.24926			38.3	0.0738567	7.38567
	7.507	0.113735	11.3735		79.3	0.113841	11.3841			6.775	0.0726912	7.26912			38.3	0.0740591	7.40591
	7.507	0.114046	11.4046		79.5	0.114152	11.4152			6.775	0.0728898	7.28898			38.4	0.0742614	7.42614
	7.568	0.114357	11.4357		79.5	0.114463	11.4463			6.775	0.0730884	7.30884			38.4	0.0744638	7.44638
	7.568	0.114667	11.4667		79.7	0.114774	11.4774			6.775	0.073287	7.3287			38.5	0.0746661	7.46661
	7.568	0.114978	11.4978		79.9	0.115086	11.5086			6.775	0.0734856	7.34856			38.8	0.0748685	7.48685
	7.568	0.115289	11.5289		79.9	0.115397	11.5397			6.775	0.0736842	7.36842			38.8	0.0750708	7.50708
	7.568	0.1156	11.56		80	0.115708	11.5708			6.775	0.0738828	7.38828			38.8	0.0752732	7.52732
	7.568	0.115911	11.5911		80	0.116019	11.6019			6.775	0.0740814	7.40814			38.8	0.0754755	7.54755
	7.568	0.116221	11.6221		80.1	0.11633	11.633			6.775	0.07428	7.428			38.9	0.0756779	7.56779
	7.568	0.116532	11.6532		80.2	0.116641	11.6641			6.775	0.0744786	7.44786			39	0.0758802	7.58802
	7.568	0.116843	11.6843		80.2	0.116952	11.6952			6.775	0.0746773	7.46773			39.1	0.0760826	7.60826
	7.568	0.117154	11.7154		80.5	0.117263	11.7263			6.775	0.0748759	7.48759			39.2	0.0762849	7.62849
	7.568	0.117464	11.7464		80.7	0.117574	11.7574			6.775	0.0750745	7.50745			39.2	0.0764873	7.64873
	7.568	0.117775	11.7775		80.8	0.117885	11.7885			6.775	0.0752731	7.52731			39.4	0.0766896	7.66896
	7.568	0.118086	11.8086		81.2	0.118196	11.8196			6.836	0.0754717	7.54717			39.6	0.0768919	7.68919
	7.568	0.118397	11.8397		81.6	0.118507	11.8507			6.836	0.0756703	7.56703			39.7	0.0770943	7.70943
	7.568	0.118707	11.8707		81.6	0.118818	11.8818			6.836	0.0758689	7.58689			39.7	0.0772966	7.72966
	7.568	0.119018	11.9018		82	0.119129	11.9129			6.836	0.0760675	7.60675			39.7	0.077499	7.7499
	7.629	0.119329	11.9329		82	0.11944	11.944			6.836	0.0762661	7.62661			39.7	0.0777013	7.77013
	7.629	0.11964	11.964		82.1	0.119751	11.9751			6.836	0.0764647	7.64647			39.7	0.0779037	7.79037
	7.629	0.11995	11.995		82.1	0.120062	12.0062			6.836	0.0766634	7.66634			40	0.078106	7.8106
	7.629	0.120261	12.0261		82.3	0.120373	12.0373			6.836	0.076862	7.6862			40.1	0.0783084	7.83084
	7.629	0.120572	12.0572		82.4	0.120684	12.0684			6.836	0.0770606	7.70606			40.3	0.0785107	7.85107
	7.629	0.120883	12.0883		82.8	0.120995	12.0995			6.836	0.0772592	7.72592			40.4	0.0787131	7.87131
	7.629	0.121193	12.1193		83.1	0.121306	12.1306			6.836	0.0774578	7.74578			40.5	0.0789154	7.89154
	7.629	0.121504	12.1504		83.4	0.121617	12.1617			6.836	0.0776564	7.76564			40.5	0.0791178	7.91178
	7.629	0.121815	12.1815		83.5	0.121928	12.1928			6.836	0.077855	7.7855			40.5	0.0793201	7.93201
	7.629	0.122126	12.2126		83.5	0.12224	12.224			6.836	0.0780536	7.80536			40.8	0.0795225	7.95225
	7.629	0.122436	12.2436		83.5	0.122551	12.2551			6.836	0.0782522	7.82522			40.9	0.0797248	7.97248
	7.629	0.122747	12.2747		83.8	0.122862	12.2862			6.836	0.0784508	7.84508			40.9	0.0799272	7.99272
	7.629	0.123058	12.3058		83.8	0.123173	12.3173			6.836	0.0786495	7.86495			40.9	0.0801295	8.01295
	7.629	0.123369	12.3369		83.9	0.123484	12.3484			6.836	0.0788481	7.88481			41	0.0803318	8.03318
	7.629	0.123679	12.3679		84	0.123795	12.3795			6.897	0.0790467	7.90467			41	0.0805342	8.05342
	7.629	0.12399	12.399		84.1	0.124106	12.4106			6.897	0.0792453	7.92453			41.2	0.0807365	8.07365
	7.629	0.124301	12.4301		84.2	0.124417	12.4417			6.897	0.0794439	7.94439			41.2	0.0809389	8.09389
	7.629	0.124612	12.4612		84.6	0.124728	12.4728			6.897	0.0796425	7.96425			41.3	0.0811412	8.11412
	7.69	0.124922	12.4922		84.7	0.125039	12.5039			6.897	0.0798411	7.98411			41.3	0.0813436	8.13436
	7.69	0.125233	12.5233		85.2	0.12535	12.535			6.897	0.0800397	8.00397			41.5	0.0815459	8.15459
	7.69	0.125544	12.5544		85.3	0.125661	12.5661			6.897	0.0802383	8.02383			41.5	0.0817483	8.17483
	7.69	0.125855	12.5855		85.7	0.125972	12.5972			6.897	0.0804369	8.04369			41.6	0.0819506	8.19506
	7.69	0.126165	12.6165		86	0.126283	12.6283			6.897	0.0806356	8.06356			41.6	0.082153	8.2153
	7.69	0.126476	12.6476		86	0.126594	12.6594			6.897	0.0808342	8.08342			41.8	0.0823553	8.23553
	7.69	0.126787	12.6787		86.1	0.126905	12.6905			6.897	0.0810328	8.10328			41.8	0.0825577	8.25577
	7.69	0.127098	12.7098		86.2	0.127216	12.7216			6.897	0.0812314	8.12314			41.9	0.08276	8.276
	7.69	0.127408	12.7408		86.3	0.127527	12.7527			6.897	0.08143	8.143			41.9	0.0829624	8.29624
	7.69	0.127719	12.7719		86.7	0.127838	12.7838			6.897	0.0816286	8.16286			41.9	0.0831647	8.31647
	7.69	0.12803	12.803		86.7	0.128149	12.8149			6.897	0.0818272	8.18272			42	0.0833671	8.33671
	7.69	0.128341	12.8341		86.8	0.12846	12.846			6.897	0.0820258	8.20258			42.1	0.0835694	8.35694
	7.69	0.128651	12.8651		86.8	0.128771	12.8771			6.897	0.0822244	8.22244			42.1	0.0837718	8.37718
	7.69	0.128962	12.8962		87.1	0.129082	12.9082			6.897	0.082423	8.2423			42.2	0.0839741	8.39741
	7.69	0.129273	12.9273		87.4	0.129393	12.9393			6.897	0.0826216	8.26216			42.2	0.0841764	8.41764
	7.69	0.129584	12.9584		87.6	0.129705	12.9705			6.897	0.0828203	8.28203			42.3	0.0843788	8.43788
	7.69	0.129894	12.9894		87.6	0.130016	13.0016			6.897	0.0830189	8.30189			42.4	0.0845811	8.45811
	7.69	0.130205	13.0205		87.8	0.130327	13.0327			6.897	0.0832175	8.32175			42.5	0.0847835	8.47835
	7.751	0.130516	13.0516		88	0.130638	13.0638			6.958	0.0834161	8.34161			42.7	0.0849858	8.49858
	7.751	0.130827	13.0827		88.3	0.130949	13.0949			6.958	0.0836147	8.36147			42.7	0.0851882	8.51882
	7.751	0.131137	13.1137		88.4	0.13126	13.126			6.958	0.0838133	8.38133			42.8	0.0853905	8.53905
	7.751	0.131448	13.1448		88.5	0.131571	13.1571			6.958	0.0840119	8.40119			42.9	0.0855929	8.55929
	7.751	0.131759	13.1759		88.8	0.131882	13.1882			6.958	0.0842105	8.42105			43	0.0857952	8.57952
	7.751	0.13207	13.207		88.8	0.132193	13.2193			6.958	0.0844091	8.44091			43	0.0859976	8.59976
	7.751	0.13238	13.238		88.9	0.132504	13.2504			6.958	0.0846077	8.46077			43	0.0861999	8.61999
	7.751	0.132691	13.2691		89.1	0.132815	13.2815			6.958	0.0848064	8.48064			43.1	0.0864023	8.64023
	7.751	0.133002	13.3002		89.3	0.133126	13.3126			6.958	0.085005	8.5005			43.2	0.0866046	8.66046
	7.751	0.133313	13.3313		89.4	0.133437	13.3437			6.958	0.0852036	8.52036			43.3	0.086807	8.6807
	7.751	0.133623	13.3623		89.5	0.133748	13.3748			6.958	0.0854022	8.54022			43.3	0.0870093	8.70093
	7.751	0.133934	13.3934		89.7	0.134059	13.4059			6.958	0.0856008	8.56008			43.3	0.0872117	8.72117
	7.751	0.134245	13.4245		89.7	0.13437	13.437			6.958	0.0857994	8.57994			43.4	0.087414	8.7414
	7.813	0.134556	13.4556		89.9	0.134681	13.4681			6.958	0.085998	8.5998			43.5	0.0876163	8.76163
	7.813	0.134866	13.4866		90.1	0.134992	13.4992			6.958	0.0861966	8.61966			43.7	0.0878187	8.78187
	7.813	0.135177	13.5177		90.2	0.135303	13.5303			6.958	0.0863952	8.63952			43.7	0.088021	8.8021
	7.813	0.135488	13.5488		90.2	0.135614	13.5614			6.958	0.0865938	8.65938			43.8	0.0882234	8.82234
	7.813	0.135799	13.5799		90.3	0.135925	13.5925			6.958	0.0867925	8.67925			43.8	0.0884257	8.84257
	7.813	0.136109	13.6109		90.3	0.136236	13.6236			6.958	0.0869911	8.69911			43.9	0.0886281	8.86281
	7.813	0.13642	13.642		90.7	0.136547	13.6547			6.958	0.0871897	8.71897			43.9	0.0888304	8.88304
	7.813	0.136731	13.6731		91.2	0.136858	13.6858			6.958	0.0873883	8.73883			43.9	0.0890328	8.90328
	7.813	0.137042	13.7042		91.3	0.13717	13.717			6.958	0.0875869	8.75869			44	0.0892351	8.92351
	7.813	0.137352	13.7352		91.6	0.137481	13.7481			6.958	0.0877855	8.77855			44	0.0894375	8.94375
	7.813	0.137663	13.7663		91.6	0.137792	13.7792			6.958	0.0879841	8.79841			44	0.0896398	8.96398
	7.813	0.137974	13.7974		91.9	0.138103	13.8103			6.958	0.0881827	8.81827			44.1	0.0898422	8.98422
	7.813	0.138285	13.8285		91.9	0.138414	13.8414			7.019	0.0883813	8.83813			44.2	0.0900445	9.00445
	7.813	0.138595	13.8595		92.2	0.138725	13.8725			7.019	0.0885799	8.85799			44.2	0.0902469	9.02469
	7.813	0.138906	13.8906		92.6	0.139036	13.9036			7.019	0.0887786	8.87786			44.2	0.0904492	9.04492
	7.874	0.139217	13.9217		92.8	0.139347	13.9347			7.019	0.0889772	8.89772			44.3	0.0906516	9.06516
	7.874	0.139528	13.9528		92.8	0.139658	13.9658			7.019	0.0891758	8.91758			44.3	0.0908539	9.08539
	7.874	0.139838	13.9838		92.9	0.139969	13.9969			7.019	0.0893744	8.93744			44.4	0.0910563	9.10563
	7.874	0.140149	14.0149		93	0.14028	14.028			7.019	0.089573	8.9573			44.4	0.0912586	9.12586
	7.874	0.14046	14.046		93	0.140591	14.0591			7.019	0.0897716	8.97716			44.4	0.0914609	9.14609
	7.874	0.140771	14.0771		93.3	0.140902	14.0902			7.019	0.0899702	8.99702			44.4	0.0916633	9.16633
	7.874	0.141081	14.1081		93.5	0.141213	14.1213			7.019	0.0901688	9.01688			44.7	0.0918656	9.18656
	7.874	0.141392	14.1392		93.5	0.141524	14.1524			7.019	0.0903674	9.03674			44.8	0.092068	9.2068
	7.874	0.141703	14.1703		93.5	0.141835	14.1835			7.019	0.090566	9.0566			44.8	0.0922703	9.22703
	7.874	0.142014	14.2014		93.8	0.142146	14.2146			7.019	0.0907646	9.07646			44.8	0.0924727	9.24727
	7.874	0.142324	14.2324		93.9	0.142457	14.2457			7.019	0.0909633	9.09633			44.8	0.092675	9.2675
	7.935	0.142635	14.2635		94	0.142768	14.2768			7.019	0.0911619	9.11619			45.2	0.0928774	9.28774
	7.935	0.142946	14.2946		94.3	0.143079	14.3079			7.019	0.0913605	9.13605			45.2	0.0930797	9.30797
	7.935	0.143257	14.3257		94.5	0.14339	14.339			7.019	0.0915591	9.15591			45.3	0.0932821	9.32821
	7.935	0.143567	14.3567		94.6	0.143701	14.3701			7.019	0.0917577	9.17577			45.4	0.0934844	9.34844
	7.935	0.143878	14.3878		94.7	0.144012	14.4012			7.019	0.0919563	9.19563			45.4	0.0936868	9.36868
	7.935	0.144189	14.4189		94.8	0.144323	14.4323			7.019	0.0921549	9.21549			45.5	0.0938891	9.38891
	7.935	0.1445	14.45		94.9	0.144635	14.4635			7.019	0.0923535	9.23535			45.6	0.0940915	9.40915
	7.935	0.14481	14.481		95.1	0.144946	14.4946			7.019	0.0925521	9.25521			45.6	0.0942938	9.42938
	7.935	0.145121	14.5121		95.1	0.145257	14.5257			7.019	0.0927507	9.27507			45.7	0.0944962	9.44962
	7.935	0.145432	14.5432		95.3	0.145568	14.5568			7.08	0.0929494	9.29494			45.8	0.0946985	9.46985
	7.935	0.145743	14.5743		95.3	0.145879	14.5879			7.08	0.093148	9.3148			45.8	0.0949008	9.49008
	7.935	0.146053	14.6053		95.5	0.14619	14.619			7.08	0.0933466	9.33466			46	0.0951032	9.51032
	7.935	0.146364	14.6364		95.6	0.146501	14.6501			7.08	0.0935452	9.35452			46	0.0953055	9.53055
	7.935	0.146675	14.6675		96	0.146812	14.6812			7.08	0.0937438	9.37438			46	0.0955079	9.55079
	7.935	0.146986	14.6986		96	0.147123	14.7123			7.08	0.0939424	9.39424			46.1	0.0957102	9.57102
	7.935	0.147296	14.7296		96.4	0.147434	14.7434			7.08	0.094141	9.4141			46.2	0.0959126	9.59126
	7.935	0.147607	14.7607		96.4	0.147745	14.7745			7.08	0.0943396	9.43396			46.2	0.0961149	9.61149
	7.935	0.147918	14.7918		96.6	0.148056	14.8056			7.08	0.0945382	9.45382			46.3	0.0963173	9.63173
	7.935	0.148229	14.8229		96.6	0.148367	14.8367			7.08	0.0947368	9.47368			46.3	0.0965196	9.65196
	7.935	0.148539	14.8539		96.6	0.148678	14.8678			7.08	0.0949355	9.49355			46.3	0.096722	9.6722
	7.935	0.14885	14.885		96.7	0.148989	14.8989			7.08	0.0951341	9.51341			46.3	0.0969243	9.69243
	7.935	0.149161	14.9161		96.9	0.1493	14.93			7.08	0.0953327	9.53327			46.4	0.0971267	9.71267
	7.935	0.149472	14.9472		97.4	0.149611	14.9611			7.08	0.0955313	9.55313			46.4	0.097329	9.7329
	7.996	0.149782	14.9782		97.5	0.149922	14.9922			7.08	0.0957299	9.57299			46.5	0.0975314	9.75314
	7.996	0.150093	15.0093		98.1	0.150233	15.0233			7.08	0.0959285	9.59285			46.5	0.0977337	9.77337
	7.996	0.150404	15.0404		98.2	0.150544	15.0544			7.08	0.0961271	9.61271			46.6	0.0979361	9.79361
	7.996	0.150715	15.0715		98.3	0.150855	15.0855			7.08	0.0963257	9.63257			46.7	0.0981384	9.81384
	7.996	0.151025	15.1025		98.3	0.151166	15.1166			7.08	0.0965243	9.65243			46.7	0.0983408	9.83408
	7.996	0.151336	15.1336		98.5	0.151477	15.1477			7.08	0.0967229	9.67229			46.7	0.0985431	9.85431
	7.996	0.151647	15.1647		98.5	0.151788	15.1788			7.08	0.0969215	9.69215			46.7	0.0987454	9.87454
	7.996	0.151958	15.1958		98.5	0.1521	15.21			7.08	0.0971202	9.71202			46.7	0.0989478	9.89478
	7.996	0.152268	15.2268		98.5	0.152411	15.2411			7.08	0.0973188	9.73188			46.8	0.0991501	9.91501
	7.996	0.152579	15.2579		98.7	0.152722	15.2722			7.08	0.0975174	9.75174			46.8	0.0993525	9.93525
	7.996	0.15289	15.289		98.7	0.153033	15.3033			7.08	0.097716	9.7716			46.9	0.0995548	9.95548
	7.996	0.153201	15.3201		99.4	0.153344	15.3344			7.08	0.0979146	9.79146			47.2	0.0997572	9.97572
	7.996	0.153511	15.3511		99.6	0.153655	15.3655			7.08	0.0981132	9.81132			47.2	0.0999595	9.99595
	7.996	0.153822	15.3822		99.7	0.153966	15.3966			7.08	0.0983118	9.83118			47.3	0.100162	10.0162
	7.996	0.154133	15.4133		100	0.154277	15.4277			7.08	0.0985104	9.85104			47.5	0.100364	10.0364
	7.996	0.154444	15.4444		100.9	0.154588	15.4588			7.08	0.098709	9.8709			47.5	0.100567	10.0567
	7.996	0.154755	15.4755		101.1	0.154899	15.4899			7.08	0.0989076	9.89076			47.7	0.100769	10.0769
	8.057	0.155065	15.5065		101.6	0.15521	15.521			7.08	0.0991063	9.91063			47.8	0.100971	10.0971
	8.057	0.155376	15.5376		101.6	0.155521	15.5521			7.08	0.0993049	9.93049			47.9	0.101174	10.1174
	8.057	0.155687	15.5687		101.9	0.155832	15.5832			7.08	0.0995035	9.95035			47.9	0.101376	10.1376
	8.057	0.155998	15.5998		102.1	0.156143	15.6143			7.08	0.0997021	9.97021			47.9	0.101578	10.1578
	8.057	0.156308	15.6308		102.3	0.156454	15.6454			7.08	0.0999007	9.99007			48.2	0.101781	10.1781
	8.057	0.156619	15.6619		102.6	0.156765	15.6765			7.08	0.100099	10.0099			48.3	0.101983	10.1983
	8.057	0.15693	15.693		102.6	0.157076	15.7076			7.08	0.100298	10.0298			48.5	0.102185	10.2185
	8.057	0.157241	15.7241		102.8	0.157387	15.7387			7.08	0.100497	10.0497			48.5	0.102388	10.2388
	8.057	0.157551	15.7551		102.8	0.157698	15.7698			7.08	0.100695	10.0695			48.6	0.10259	10.259
	8.057	0.157862	15.7862		103	0.158009	15.8009			7.08	0.100894	10.0894			48.7	0.102792	10.2792
	8.057	0.158173	15.8173		103.1	0.15832	15.832			7.08	0.101092	10.1092			48.7	0.102995	10.2995
	8.057	0.158484	15.8484		103.2	0.158631	15.8631			7.08	0.101291	10.1291			48.8	0.103197	10.3197
	8.057	0.158794	15.8794		103.9	0.158942	15.8942			7.08	0.10149	10.149			48.9	0.103399	10.3399
	8.057	0.159105	15.9105		104	0.159253	15.9253			7.08	0.101688	10.1688			49	0.103602	10.3602
	8.057	0.159416	15.9416		104.1	0.159565	15.9565			7.08	0.101887	10.1887			49	0.103804	10.3804
	8.057	0.159727	15.9727		104.1	0.159876	15.9876			7.141	0.102085	10.2085			49	0.104006	10.4006
	8.057	0.160037	16.0037		104.3	0.160187	16.0187			7.141	0.102284	10.2284			49	0.104209	10.4209
	8.118	0.160348	16.0348		104.6	0.160498	16.0498			7.141	0.102483	10.2483			49.1	0.104411	10.4411
	8.118	0.160659	16.0659		104.8	0.160809	16.0809			7.141	0.102681	10.2681			49.1	0.104614	10.4614
	8.118	0.16097	16.097		104.8	0.16112	16.112			7.141	0.10288	10.288			49.2	0.104816	10.4816
	8.118	0.16128	16.128		105	0.161431	16.1431			7.141	0.103078	10.3078			49.2	0.105018	10.5018
	8.118	0.161591	16.1591		105.2	0.161742	16.1742			7.141	0.103277	10.3277			49.3	0.105221	10.5221
	8.118	0.161902	16.1902		105.3	0.162053	16.2053			7.141	0.103476	10.3476			49.4	0.105423	10.5423
	8.118	0.162213	16.2213		105.7	0.162364	16.2364			7.141	0.103674	10.3674			49.6	0.105625	10.5625
	8.118	0.162523	16.2523		106	0.162675	16.2675			7.141	0.103873	10.3873			49.6	0.105828	10.5828
	8.118	0.162834	16.2834		106.2	0.162986	16.2986			7.141	0.104071	10.4071			49.7	0.10603	10.603
	8.118	0.163145	16.3145		106.7	0.163297	16.3297			7.141	0.10427	10.427			49.7	0.106232	10.6232
	8.118	0.163456	16.3456		107	0.163608	16.3608			7.141	0.104469	10.4469			49.7	0.106435	10.6435
	8.118	0.163766	16.3766		107.6	0.163919	16.3919			7.141	0.104667	10.4667			49.7	0.106637	10.6637
	8.118	0.164077	16.4077		107.7	0.16423	16.423			7.141	0.104866	10.4866			49.8	0.106839	10.6839
	8.118	0.164388	16.4388		107.7	0.164541	16.4541			7.141	0.105065	10.5065			50	0.107042	10.7042
	8.118	0.164699	16.4699		107.7	0.164852	16.4852			7.141	0.105263	10.5263			50.2	0.107244	10.7244
	8.118	0.165009	16.5009		107.9	0.165163	16.5163			7.141	0.105462	10.5462			50.2	0.107446	10.7446
	8.118	0.16532	16.532		107.9	0.165474	16.5474			7.202	0.10566	10.566			50.2	0.107649	10.7649
	8.118	0.165631	16.5631		108	0.165785	16.5785			7.202	0.105859	10.5859			50.3	0.107851	10.7851
	8.118	0.165942	16.5942		108.5	0.166096	16.6096			7.202	0.106058	10.6058			50.3	0.108053	10.8053
	8.118	0.166252	16.6252		108.5	0.166407	16.6407			7.202	0.106256	10.6256			50.3	0.108256	10.8256
	8.118	0.166563	16.6563		108.7	0.166719	16.6719			7.202	0.106455	10.6455			50.3	0.108458	10.8458
	8.179	0.166874	16.6874		108.9	0.16703	16.703			7.202	0.106653	10.6653			50.4	0.10866	10.866
	8.179	0.167185	16.7185		108.9	0.167341	16.7341			7.202	0.106852	10.6852			50.5	0.108863	10.8863
	8.179	0.167495	16.7495		109	0.167652	16.7652			7.202	0.107051	10.7051			50.5	0.109065	10.9065
	8.179	0.167806	16.7806		109.2	0.167963	16.7963			7.202	0.107249	10.7249			50.7	0.109268	10.9268
	8.179	0.168117	16.8117		109.3	0.168274	16.8274			7.202	0.107448	10.7448			50.8	0.10947	10.947
	8.179	0.168428	16.8428		109.3	0.168585	16.8585			7.202	0.107646	10.7646			50.8	0.109672	10.9672
	8.179	0.168738	16.8738		109.4	0.168896	16.8896			7.202	0.107845	10.7845			50.9	0.109875	10.9875
	8.179	0.169049	16.9049		109.6	0.169207	16.9207			7.202	0.108044	10.8044			51.2	0.110077	11.0077
	8.179	0.16936	16.936		109.7	0.169518	16.9518			7.202	0.108242	10.8242			51.2	0.110279	11.0279
	8.179	0.169671	16.9671		109.9	0.169829	16.9829			7.202	0.108441	10.8441			51.4	0.110482	11.0482
	8.179	0.169981	16.9981		110.1	0.17014	17.014			7.202	0.10864	10.864			51.5	0.110684	11.0684
	8.179	0.170292	17.0292		110.2	0.170451	17.0451			7.202	0.108838	10.8838			51.5	0.110886	11.0886
	8.179	0.170603	17.0603		110.4	0.170762	17.0762			7.202	0.109037	10.9037			51.5	0.111089	11.1089
	8.179	0.170914	17.0914		110.6	0.171073	17.1073			7.202	0.109235	10.9235			51.6	0.111291	11.1291
	8.179	0.171224	17.1224		110.9	0.171384	17.1384			7.202	0.109434	10.9434			51.6	0.111493	11.1493
	8.179	0.171535	17.1535		111.1	0.171695	17.1695			7.202	0.109633	10.9633			51.7	0.111696	11.1696
	8.179	0.171846	17.1846		111.4	0.172006	17.2006			7.202	0.109831	10.9831			51.8	0.111898	11.1898
	8.179	0.172157	17.2157		111.7	0.172317	17.2317			7.202	0.11003	11.003			51.9	0.1121	11.21
	8.179	0.172467	17.2467		112.1	0.172628	17.2628			7.202	0.110228	11.0228			51.9	0.112303	11.2303
	8.179	0.172778	17.2778		112.2	0.172939	17.2939			7.263	0.110427	11.0427			52	0.112505	11.2505
	8.179	0.173089	17.3089		112.5	0.17325	17.325			7.263	0.110626	11.0626			52.2	0.112707	11.2707
	8.179	0.1734	17.34		112.7	0.173561	17.3561			7.263	0.110824	11.0824			52.2	0.11291	11.291
	8.179	0.17371	17.371		113.3	0.173872	17.3872			7.263	0.111023	11.1023			52.3	0.113112	11.3112
	8.24	0.174021	17.4021		113.3	0.174184	17.4184			7.263	0.111221	11.1221			52.4	0.113314	11.3314
	8.24	0.174332	17.4332		113.3	0.174495	17.4495			7.263	0.11142	11.142			52.5	0.113517	11.3517
	8.24	0.174643	17.4643		113.4	0.174806	17.4806			7.263	0.111619	11.1619			52.5	0.113719	11.3719
	8.24	0.174953	17.4953		113.8	0.175117	17.5117			7.263	0.111817	11.1817			52.6	0.113921	11.3921
	8.24	0.175264	17.5264		113.9	0.175428	17.5428			7.263	0.112016	11.2016			52.6	0.114124	11.4124
	8.24	0.175575	17.5575		114	0.175739	17.5739			7.263	0.112214	11.2214			52.7	0.114326	11.4326
	8.24	0.175886	17.5886		114	0.17605	17.605			7.263	0.112413	11.2413			52.8	0.114529	11.4529
	8.24	0.176196	17.6196		114.3	0.176361	17.6361			7.263	0.112612	11.2612			52.8	0.114731	11.4731
	8.24	0.176507	17.6507		114.4	0.176672	17.6672			7.263	0.11281	11.281			52.8	0.114933	11.4933
	8.24	0.176818	17.6818		114.5	0.176983	17.6983			7.263	0.113009	11.3009			52.9	0.115136	11.5136
	8.24	0.177129	17.7129		114.7	0.177294	17.7294			7.263	0.113208	11.3208			53	0.115338	11.5338
	8.24	0.177439	17.7439		114.8	0.177605	17.7605			7.263	0.113406	11.3406			53	0.11554	11.554
	8.301	0.17775	17.775		114.8	0.177916	17.7916			7.263	0.113605	11.3605			53.1	0.115743	11.5743
	8.301	0.178061	17.8061		114.9	0.178227	17.8227			7.263	0.113803	11.3803			53.2	0.115945	11.5945
	8.301	0.178372	17.8372		115.1	0.178538	17.8538			7.263	0.114002	11.4002			53.4	0.116147	11.6147
	8.301	0.178682	17.8682		115.2	0.178849	17.8849			7.263	0.114201	11.4201			53.5	0.11635	11.635
	8.301	0.178993	17.8993		115.4	0.17916	17.916			7.263	0.114399	11.4399			53.5	0.116552	11.6552
	8.301	0.179304	17.9304		115.5	0.179471	17.9471			7.263	0.114598	11.4598			53.6	0.116754	11.6754
	8.301	0.179615	17.9615		115.5	0.179782	17.9782			7.263	0.114796	11.4796			53.6	0.116957	11.6957
	8.301	0.179925	17.9925		115.6	0.180093	18.0093			7.263	0.114995	11.4995			53.6	0.117159	11.7159
	8.301	0.180236	18.0236		115.8	0.180404	18.0404			7.263	0.115194	11.5194			53.7	0.117361	11.7361
	8.301	0.180547	18.0547		115.8	0.180715	18.0715			7.263	0.115392	11.5392			53.8	0.117564	11.7564
	8.301	0.180858	18.0858		116	0.181026	18.1026			7.263	0.115591	11.5591			53.8	0.117766	11.7766
	8.301	0.181168	18.1168		116.1	0.181337	18.1337			7.263	0.115789	11.5789			53.8	0.117968	11.7968
	8.301	0.181479	18.1479		116.1	0.181649	18.1649			7.263	0.115988	11.5988			53.9	0.118171	11.8171
	8.301	0.18179	18.179		116.3	0.18196	18.196			7.263	0.116187	11.6187			53.9	0.118373	11.8373
	8.301	0.182101	18.2101		116.4	0.182271	18.2271			7.263	0.116385	11.6385			54	0.118575	11.8575
	8.362	0.182411	18.2411		116.5	0.182582	18.2582			7.263	0.116584	11.6584			54	0.118778	11.8778
	8.362	0.182722	18.2722		116.7	0.182893	18.2893			7.263	0.116783	11.6783			54	0.11898	11.898
	8.362	0.183033	18.3033		116.7	0.183204	18.3204			7.263	0.116981	11.6981			54.1	0.119183	11.9183
	8.362	0.183344	18.3344		116.8	0.183515	18.3515			7.263	0.11718	11.718			54.1	0.119385	11.9385
	8.362	0.183654	18.3654		117.1	0.183826	18.3826			7.263	0.117378	11.7378			54.2	0.119587	11.9587
	8.362	0.183965	18.3965		117.3	0.184137	18.4137			7.263	0.117577	11.7577			54.2	0.11979	11.979
	8.362	0.184276	18.4276		117.3	0.184448	18.4448			7.263	0.117776	11.7776			54.3	0.119992	11.9992
	8.362	0.184587	18.4587		117.4	0.184759	18.4759			7.263	0.117974	11.7974			54.5	0.120194	12.0194
	8.362	0.184897	18.4897		117.5	0.18507	18.507			7.324	0.118173	11.8173			54.5	0.120397	12.0397
	8.362	0.185208	18.5208		117.7	0.185381	18.5381			7.324	0.118371	11.8371			54.5	0.120599	12.0599
	8.362	0.185519	18.5519		117.8	0.185692	18.5692			7.324	0.11857	11.857			54.6	0.120801	12.0801
	8.362	0.18583	18.583		118.3	0.186003	18.6003			7.324	0.118769	11.8769			54.6	0.121004	12.1004
	8.362	0.18614	18.614		118.5	0.186314	18.6314			7.324	0.118967	11.8967			54.7	0.121206	12.1206
	8.362	0.186451	18.6451		118.7	0.186625	18.6625			7.324	0.119166	11.9166			54.9	0.121408	12.1408
	8.362	0.186762	18.6762		119.2	0.186936	18.6936			7.324	0.119364	11.9364			54.9	0.121611	12.1611
	8.362	0.187073	18.7073		119.3	0.187247	18.7247			7.324	0.119563	11.9563			54.9	0.121813	12.1813
	8.362	0.187383	18.7383		119.3	0.187558	18.7558			7.324	0.119762	11.9762			55	0.122015	12.2015
	8.362	0.187694	18.7694		119.8	0.187869	18.7869			7.324	0.11996	11.996			55.1	0.122218	12.2218
	8.362	0.188005	18.8005		119.8	0.18818	18.818			7.324	0.120159	12.0159			55.2	0.12242	12.242
	8.423	0.188316	18.8316		120.2	0.188491	18.8491			7.324	0.120357	12.0357			55.2	0.122622	12.2622
	8.423	0.188626	18.8626		120.3	0.188802	18.8802			7.324	0.120556	12.0556			55.3	0.122825	12.2825
	8.423	0.188937	18.8937		120.4	0.189114	18.9114			7.324	0.120755	12.0755			55.3	0.123027	12.3027
	8.423	0.189248	18.9248		120.4	0.189425	18.9425			7.324	0.120953	12.0953			55.3	0.123229	12.3229
	8.423	0.189559	18.9559		120.6	0.189736	18.9736			7.324	0.121152	12.1152			55.5	0.123432	12.3432
	8.423	0.189869	18.9869		120.7	0.190047	19.0047			7.324	0.121351	12.1351			55.5	0.123634	12.3634
	8.423	0.19018	19.018		120.7	0.190358	19.0358			7.324	0.121549	12.1549			55.5	0.123837	12.3837
	8.423	0.190491	19.0491		120.9	0.190669	19.0669			7.324	0.121748	12.1748			55.6	0.124039	12.4039
	8.423	0.190802	19.0802		121	0.19098	19.098			7.324	0.121946	12.1946			55.7	0.124241	12.4241
	8.423	0.191112	19.1112		121.5	0.191291	19.1291			7.324	0.122145	12.2145			55.7	0.124444	12.4444
	8.423	0.191423	19.1423		121.6	0.191602	19.1602			7.324	0.122344	12.2344			55.7	0.124646	12.4646
	8.423	0.191734	19.1734		121.7	0.191913	19.1913			7.324	0.122542	12.2542			55.7	0.124848	12.4848
	8.423	0.192045	19.2045		122.2	0.192224	19.2224			7.324	0.122741	12.2741			55.8	0.125051	12.5051
	8.423	0.192356	19.2356		122.3	0.192535	19.2535			7.324	0.122939	12.2939			55.9	0.125253	12.5253
	8.423	0.192666	19.2666		122.3	0.192846	19.2846			7.324	0.123138	12.3138			55.9	0.125455	12.5455
	8.423	0.192977	19.2977		122.4	0.193157	19.3157			7.324	0.123337	12.3337			56	0.125658	12.5658
	8.423	0.193288	19.3288		122.4	0.193468	19.3468			7.324	0.123535	12.3535			56.4	0.12586	12.586
	8.423	0.193599	19.3599		122.4	0.193779	19.3779			7.324	0.123734	12.3734			56.5	0.126062	12.6062
	8.423	0.193909	19.3909		122.5	0.19409	19.409			7.324	0.123932	12.3932			56.5	0.126265	12.6265
	8.423	0.19422	19.422		122.7	0.194401	19.4401			7.324	0.124131	12.4131			56.5	0.126467	12.6467
	8.423	0.194531	19.4531		123.1	0.194712	19.4712			7.324	0.12433	12.433			56.6	0.126669	12.6669
	8.484	0.194842	19.4842		123.9	0.195023	19.5023			7.324	0.124528	12.4528			56.6	0.126872	12.6872
	8.484	0.195152	19.5152		123.9	0.195334	19.5334			7.324	0.124727	12.4727			56.7	0.127074	12.7074
	8.484	0.195463	19.5463		124.2	0.195645	19.5645			7.324	0.124926	12.4926			56.8	0.127276	12.7276
	8.484	0.195774	19.5774		124.5	0.195956	19.5956			7.385	0.125124	12.5124			57	0.127479	12.7479
	8.484	0.196085	19.6085		124.5	0.196267	19.6267			7.385	0.125323	12.5323			57.1	0.127681	12.7681
	8.484	0.196395	19.6395		124.7	0.196579	19.6579			7.385	0.125521	12.5521			57.1	0.127883	12.7883
	8.484	0.196706	19.6706		124.8	0.19689	19.689			7.385	0.12572	12.572			57.3	0.128086	12.8086
	8.484	0.197017	19.7017		124.9	0.197201	19.7201			7.385	0.125919	12.5919			57.4	0.128288	12.8288
	8.484	0.197328	19.7328		125.4	0.197512	19.7512			7.385	0.126117	12.6117			57.5	0.12849	12.849
	8.484	0.197638	19.7638		125.6	0.197823	19.7823			7.385	0.126316	12.6316			57.5	0.128693	12.8693
	8.484	0.197949	19.7949		125.8	0.198134	19.8134			7.385	0.126514	12.6514			57.5	0.128895	12.8895
	8.484	0.19826	19.826		126	0.198445	19.8445			7.385	0.126713	12.6713			57.5	0.129098	12.9098
	8.484	0.198571	19.8571		126.1	0.198756	19.8756			7.385	0.126912	12.6912			57.6	0.1293	12.93
	8.484	0.198881	19.8881		126.1	0.199067	19.9067			7.385	0.12711	12.711			57.6	0.129502	12.9502
	8.484	0.199192	19.9192		126.3	0.199378	19.9378			7.385	0.127309	12.7309			57.7	0.129705	12.9705
	8.484	0.199503	19.9503		126.8	0.199689	19.9689			7.385	0.127507	12.7507			57.8	0.129907	12.9907
	8.484	0.199814	19.9814		126.8	0.2	20			7.385	0.127706	12.7706			57.8	0.130109	13.0109
	8.545	0.200124	20.0124		126.9	0.200311	20.0311			7.385	0.127905	12.7905			57.8	0.130312	13.0312
	8.545	0.200435	20.0435		127	0.200622	20.0622			7.385	0.128103	12.8103			57.8	0.130514	13.0514
	8.545	0.200746	20.0746		127	0.200933	20.0933			7.385	0.128302	12.8302			57.9	0.130716	13.0716
	8.545	0.201057	20.1057		127.4	0.201244	20.1244			7.385	0.1285	12.85			57.9	0.130919	13.0919
	8.545	0.201367	20.1367		127.4	0.201555	20.1555			7.385	0.128699	12.8699			58	0.131121	13.1121
	8.545	0.201678	20.1678		127.6	0.201866	20.1866			7.385	0.128898	12.8898			58	0.131323	13.1323
	8.545	0.201989	20.1989		127.8	0.202177	20.2177			7.385	0.129096	12.9096			58.1	0.131526	13.1526
	8.545	0.2023	20.23		127.8	0.202488	20.2488			7.385	0.129295	12.9295			58.3	0.131728	13.1728
	8.545	0.20261	20.261		128	0.202799	20.2799			7.385	0.129494	12.9494			58.3	0.13193	13.193
	8.545	0.202921	20.2921		128.2	0.20311	20.311			7.385	0.129692	12.9692			58.4	0.132133	13.2133
	8.545	0.203232	20.3232		128.2	0.203421	20.3421			7.385	0.129891	12.9891			58.4	0.132335	13.2335
	8.545	0.203543	20.3543		128.8	0.203733	20.3733			7.385	0.130089	13.0089			58.5	0.132537	13.2537
	8.545	0.203853	20.3853		128.8	0.204044	20.4044			7.446	0.130288	13.0288			58.5	0.13274	13.274
	8.545	0.204164	20.4164		129	0.204355	20.4355			7.446	0.130487	13.0487			58.6	0.132942	13.2942
	8.545	0.204475	20.4475		129	0.204666	20.4666			7.446	0.130685	13.0685			58.6	0.133144	13.3144
	8.545	0.204786	20.4786		129.1	0.204977	20.4977			7.446	0.130884	13.0884			58.8	0.133347	13.3347
	8.545	0.205096	20.5096		129.1	0.205288	20.5288			7.446	0.131082	13.1082			58.8	0.133549	13.3549
	8.545	0.205407	20.5407		129.2	0.205599	20.5599			7.446	0.131281	13.1281			58.8	0.133752	13.3752
	8.545	0.205718	20.5718		129.2	0.20591	20.591			7.446	0.13148	13.148			58.8	0.133954	13.3954
	8.545	0.206029	20.6029		129.6	0.206221	20.6221			7.446	0.131678	13.1678			58.8	0.134156	13.4156
	8.606	0.206339	20.6339		129.8	0.206532	20.6532			7.446	0.131877	13.1877			59	0.134359	13.4359
	8.606	0.20665	20.665		130	0.206843	20.6843			7.446	0.132075	13.2075			59.1	0.134561	13.4561
	8.606	0.206961	20.6961		130	0.207154	20.7154			7.446	0.132274	13.2274			59.2	0.134763	13.4763
	8.606	0.207272	20.7272		130	0.207465	20.7465			7.446	0.132473	13.2473			59.2	0.134966	13.4966
	8.606	0.207582	20.7582		130.1	0.207776	20.7776			7.446	0.132671	13.2671			59.2	0.135168	13.5168
	8.606	0.207893	20.7893		130.4	0.208087	20.8087			7.446	0.13287	13.287			59.4	0.13537	13.537
	8.606	0.208204	20.8204		130.6	0.208398	20.8398			7.446	0.133069	13.3069			59.5	0.135573	13.5573
	8.606	0.208515	20.8515		130.7	0.208709	20.8709			7.446	0.133267	13.3267			59.6	0.135775	13.5775
	8.606	0.208825	20.8825		130.7	0.20902	20.902			7.446	0.133466	13.3466			59.6	0.135977	13.5977
	8.606	0.209136	20.9136		130.8	0.209331	20.9331			7.446	0.133664	13.3664			59.7	0.13618	13.618
	8.606	0.209447	20.9447		130.9	0.209642	20.9642			7.446	0.133863	13.3863			59.7	0.136382	13.6382
	8.606	0.209758	20.9758		131.3	0.209953	20.9953			7.446	0.134062	13.4062			59.8	0.136584	13.6584
	8.606	0.210068	21.0068		131.4	0.210264	21.0264			7.446	0.13426	13.426			59.8	0.136787	13.6787
	8.606	0.210379	21.0379		131.5	0.210575	21.0575			7.446	0.134459	13.4459			60	0.136989	13.6989
	8.606	0.21069	21.069		131.6	0.210886	21.0886			7.446	0.134657	13.4657			60	0.137191	13.7191
	8.606	0.211001	21.1001		131.9	0.211198	21.1198			7.446	0.134856	13.4856			60.1	0.137394	13.7394
	8.606	0.211311	21.1311		132.3	0.211509	21.1509			7.446	0.135055	13.5055			60.1	0.137596	13.7596
	8.606	0.211622	21.1622		132.4	0.21182	21.182			7.446	0.135253	13.5253			60.2	0.137798	13.7798
	8.606	0.211933	21.1933		132.5	0.212131	21.2131			7.446	0.135452	13.5452			60.3	0.138001	13.8001
	8.667	0.212244	21.2244		133.1	0.212442	21.2442			7.507	0.13565	13.565			60.4	0.138203	13.8203
	8.667	0.212554	21.2554		133.2	0.212753	21.2753			7.507	0.135849	13.5849			60.4	0.138406	13.8406
	8.667	0.212865	21.2865		133.4	0.213064	21.3064			7.507	0.136048	13.6048			60.5	0.138608	13.8608
	8.667	0.213176	21.3176		133.9	0.213375	21.3375			7.507	0.136246	13.6246			60.6	0.13881	13.881
	8.667	0.213487	21.3487		133.9	0.213686	21.3686			7.507	0.136445	13.6445			60.9	0.139013	13.9013
	8.667	0.213797	21.3797		134	0.213997	21.3997			7.507	0.136643	13.6643			60.9	0.139215	13.9215
	8.667	0.214108	21.4108		134.1	0.214308	21.4308			7.507	0.136842	13.6842			60.9	0.139417	13.9417
	8.667	0.214419	21.4419		134.5	0.214619	21.4619			7.507	0.137041	13.7041			61	0.13962	13.962
	8.667	0.21473	21.473		134.7	0.21493	21.493			7.507	0.137239	13.7239			61	0.139822	13.9822
	8.667	0.21504	21.504		134.9	0.215241	21.5241			7.507	0.137438	13.7438			61.2	0.140024	14.0024
	8.667	0.215351	21.5351		135.3	0.215552	21.5552			7.507	0.137637	13.7637			61.3	0.140227	14.0227
	8.667	0.215662	21.5662		135.7	0.215863	21.5863			7.507	0.137835	13.7835			61.4	0.140429	14.0429
	8.667	0.215973	21.5973		135.8	0.216174	21.6174			7.507	0.138034	13.8034			61.4	0.140631	14.0631
	8.728	0.216283	21.6283		135.8	0.216485	21.6485			7.507	0.138232	13.8232			61.4	0.140834	14.0834
	8.728	0.216594	21.6594		136	0.216796	21.6796			7.507	0.138431	13.8431			61.4	0.141036	14.1036
	8.728	0.216905	21.6905		136.3	0.217107	21.7107			7.507	0.13863	13.863			61.4	0.141238	14.1238
	8.728	0.217216	21.7216		136.5	0.217418	21.7418			7.507	0.138828	13.8828			61.5	0.141441	14.1441
	8.728	0.217526	21.7526		136.6	0.217729	21.7729			7.507	0.139027	13.9027			61.6	0.141643	14.1643
	8.728	0.217837	21.7837		136.7	0.21804	21.804			7.507	0.139225	13.9225			61.8	0.141845	14.1845
	8.728	0.218148	21.8148		137.1	0.218351	21.8351			7.507	0.139424	13.9424			61.8	0.142048	14.2048
	8.728	0.218459	21.8459		137.1	0.218663	21.8663			7.507	0.139623	13.9623			62	0.14225	14.225
	8.728	0.218769	21.8769		137.2	0.218974	21.8974			7.507	0.139821	13.9821			62	0.142452	14.2452
	8.728	0.21908	21.908		137.4	0.219285	21.9285			7.507	0.14002	14.002			62.1	0.142655	14.2655
	8.728	0.219391	21.9391		137.5	0.219596	21.9596			7.507	0.140218	14.0218			62.4	0.142857	14.2857
	8.728	0.219702	21.9702		137.5	0.219907	21.9907			7.507	0.140417	14.0417			62.4	0.143059	14.3059
	8.789	0.220012	22.0012		138	0.220218	22.0218			7.568	0.140616	14.0616			62.5	0.143262	14.3262
	8.789	0.220323	22.0323		138.2	0.220529	22.0529			7.568	0.140814	14.0814			62.5	0.143464	14.3464
	8.789	0.220634	22.0634		138.5	0.22084	22.084			7.568	0.141013	14.1013			62.5	0.143667	14.3667
	8.789	0.220945	22.0945		138.6	0.221151	22.1151			7.568	0.141212	14.1212			62.5	0.143869	14.3869
	8.789	0.221255	22.1255		138.6	0.221462	22.1462			7.568	0.14141	14.141			62.7	0.144071	14.4071
	8.789	0.221566	22.1566		138.6	0.221773	22.1773			7.568	0.141609	14.1609			62.8	0.144274	14.4274
	8.789	0.221877	22.1877		138.9	0.222084	22.2084			7.568	0.141807	14.1807			63	0.144476	14.4476
	8.789	0.222188	22.2188		139.1	0.222395	22.2395			7.568	0.142006	14.2006			63.1	0.144678	14.4678
	8.789	0.222498	22.2498		139.5	0.222706	22.2706			7.568	0.142205	14.2205			63.1	0.144881	14.4881
	8.789	0.222809	22.2809		140	0.223017	22.3017			7.568	0.142403	14.2403			63.2	0.145083	14.5083
	8.789	0.22312	22.312		140.1	0.223328	22.3328			7.568	0.142602	14.2602			63.2	0.145285	14.5285
	8.789	0.223431	22.3431		140.3	0.223639	22.3639			7.568	0.1428	14.28			63.3	0.145488	14.5488
	8.789	0.223741	22.3741		140.4	0.22395	22.395			7.568	0.142999	14.2999			63.3	0.14569	14.569
	8.789	0.224052	22.4052		140.5	0.224261	22.4261			7.568	0.143198	14.3198			63.4	0.145892	14.5892
	8.789	0.224363	22.4363		140.8	0.224572	22.4572			7.568	0.143396	14.3396			63.5	0.146095	14.6095
	8.789	0.224674	22.4674		140.9	0.224883	22.4883			7.568	0.143595	14.3595			63.5	0.146297	14.6297
	8.85	0.224984	22.4984		140.9	0.225194	22.5194			7.568	0.143793	14.3793			63.5	0.146499	14.6499
	8.85	0.225295	22.5295		141.1	0.225505	22.5505			7.568	0.143992	14.3992			63.6	0.146702	14.6702
	8.85	0.225606	22.5606		141.1	0.225816	22.5816			7.568	0.144191	14.4191			63.6	0.146904	14.6904
	8.85	0.225917	22.5917		141.3	0.226128	22.6128			7.568	0.144389	14.4389			63.8	0.147106	14.7106
	8.85	0.226227	22.6227		141.4	0.226439	22.6439			7.568	0.144588	14.4588			63.8	0.147309	14.7309
	8.85	0.226538	22.6538		141.7	0.22675	22.675			7.568	0.144786	14.4786			63.9	0.147511	14.7511
	8.85	0.226849	22.6849		142.6	0.227061	22.7061			7.568	0.144985	14.4985			63.9	0.147713	14.7713
	8.85	0.22716	22.716		142.6	0.227372	22.7372			7.568	0.145184	14.5184			64.1	0.147916	14.7916
	8.85	0.22747	22.747		142.8	0.227683	22.7683			7.568	0.145382	14.5382			64.1	0.148118	14.8118
	8.85	0.227781	22.7781		142.8	0.227994	22.7994			7.568	0.145581	14.5581			64.1	0.148321	14.8321
	8.85	0.228092	22.8092		143.5	0.228305	22.8305			7.568	0.14578	14.578			64.4	0.148523	14.8523
	8.85	0.228403	22.8403		143.8	0.228616	22.8616			7.568	0.145978	14.5978			64.4	0.148725	14.8725
	8.85	0.228713	22.8713		144.4	0.228927	22.8927			7.568	0.146177	14.6177			64.4	0.148928	14.8928
	8.85	0.229024	22.9024		144.5	0.229238	22.9238			7.568	0.146375	14.6375			64.4	0.14913	14.913
	8.85	0.229335	22.9335		144.7	0.229549	22.9549			7.568	0.146574	14.6574			64.4	0.149332	14.9332
	8.85	0.229646	22.9646		145	0.22986	22.986			7.568	0.146773	14.6773			64.4	0.149535	14.9535
	8.85	0.229956	22.9956		145.1	0.230171	23.0171			7.568	0.146971	14.6971			64.5	0.149737	14.9737
	8.85	0.230267	23.0267		145.2	0.230482	23.0482			7.568	0.14717	14.717			64.5	0.149939	14.9939
	8.85	0.230578	23.0578		146.3	0.230793	23.0793			7.629	0.147368	14.7368			64.6	0.150142	15.0142
	8.85	0.230889	23.0889		146.3	0.231104	23.1104			7.629	0.147567	14.7567			64.6	0.150344	15.0344
	8.85	0.2312	23.12		146.5	0.231415	23.1415			7.629	0.147766	14.7766			64.7	0.150546	15.0546
	8.85	0.23151	23.151		146.6	0.231726	23.1726			7.629	0.147964	14.7964			64.8	0.150749	15.0749
	8.85	0.231821	23.1821		146.7	0.232037	23.2037			7.629	0.148163	14.8163			64.8	0.150951	15.0951
	8.85	0.232132	23.2132		146.7	0.232348	23.2348			7.629	0.148361	14.8361			64.8	0.151153	15.1153
	8.85	0.232443	23.2443		146.9	0.232659	23.2659			7.629	0.14856	14.856			64.8	0.151356	15.1356
	8.85	0.232753	23.2753		146.9	0.23297	23.297			7.629	0.148759	14.8759			64.8	0.151558	15.1558
	8.85	0.233064	23.3064		146.9	0.233281	23.3281			7.629	0.148957	14.8957			64.8	0.15176	15.176
	8.911	0.233375	23.3375		147.5	0.233593	23.3593			7.629	0.149156	14.9156			64.9	0.151963	15.1963
	8.911	0.233686	23.3686		147.9	0.233904	23.3904			7.629	0.149355	14.9355			64.9	0.152165	15.2165
	8.911	0.233996	23.3996		148	0.234215	23.4215			7.629	0.149553	14.9553			64.9	0.152367	15.2367
	8.911	0.234307	23.4307		148.1	0.234526	23.4526			7.629	0.149752	14.9752			65	0.15257	15.257
	8.911	0.234618	23.4618		148.2	0.234837	23.4837			7.629	0.14995	14.995			65	0.152772	15.2772
	8.911	0.234929	23.4929		148.3	0.235148	23.5148			7.629	0.150149	15.0149			65	0.152975	15.2975
	8.911	0.235239	23.5239		148.5	0.235459	23.5459			7.629	0.150348	15.0348			65	0.153177	15.3177
	8.911	0.23555	23.555		148.8	0.23577	23.577			7.629	0.150546	15.0546			65.1	0.153379	15.3379
	8.911	0.235861	23.5861		149	0.236081	23.6081			7.629	0.150745	15.0745			65.3	0.153582	15.3582
	8.911	0.236172	23.6172		149.3	0.236392	23.6392			7.629	0.150943	15.0943			65.4	0.153784	15.3784
	8.911	0.236482	23.6482		149.5	0.236703	23.6703			7.629	0.151142	15.1142			65.8	0.153986	15.3986
	8.911	0.236793	23.6793		149.7	0.237014	23.7014			7.629	0.151341	15.1341			65.9	0.154189	15.4189
	8.911	0.237104	23.7104		149.8	0.237325	23.7325			7.629	0.151539	15.1539			66	0.154391	15.4391
	8.972	0.237415	23.7415		149.8	0.237636	23.7636			7.629	0.151738	15.1738			66	0.154593	15.4593
	8.972	0.237725	23.7725		149.9	0.237947	23.7947			7.629	0.151936	15.1936			66.1	0.154796	15.4796
	8.972	0.238036	23.8036		150.7	0.238258	23.8258			7.629	0.152135	15.2135			66.2	0.154998	15.4998
	8.972	0.238347	23.8347		151.1	0.238569	23.8569			7.629	0.152334	15.2334			66.2	0.1552	15.52
	8.972	0.238658	23.8658		151.1	0.23888	23.888			7.629	0.152532	15.2532			66.2	0.155403	15.5403
	8.972	0.238968	23.8968		151.3	0.239191	23.9191			7.629	0.152731	15.2731			66.3	0.155605	15.5605
	8.972	0.239279	23.9279		151.6	0.239502	23.9502			7.629	0.152929	15.2929			66.3	0.155807	15.5807
	8.972	0.23959	23.959		151.7	0.239813	23.9813			7.629	0.153128	15.3128			66.3	0.15601	15.601
	8.972	0.239901	23.9901		151.8	0.240124	24.0124			7.629	0.153327	15.3327			66.3	0.156212	15.6212
	8.972	0.240211	24.0211		152	0.240435	24.0435			7.629	0.153525	15.3525			66.4	0.156414	15.6414
	8.972	0.240522	24.0522		152.2	0.240747	24.0747			7.629	0.153724	15.3724			66.5	0.156617	15.6617
	8.972	0.240833	24.0833		153.1	0.241058	24.1058			7.629	0.153923	15.3923			66.5	0.156819	15.6819
	8.972	0.241144	24.1144		153.1	0.241369	24.1369			7.629	0.154121	15.4121			66.6	0.157021	15.7021
	8.972	0.241454	24.1454		153.3	0.24168	24.168			7.629	0.15432	15.432			66.8	0.157224	15.7224
	8.972	0.241765	24.1765		153.7	0.241991	24.1991			7.629	0.154518	15.4518			66.8	0.157426	15.7426
	8.972	0.242076	24.2076		153.8	0.242302	24.2302			7.629	0.154717	15.4717			67	0.157628	15.7628
	9.033	0.242387	24.2387		153.8	0.242613	24.2613			7.629	0.154916	15.4916			67.1	0.157831	15.7831
	9.033	0.242697	24.2697		154.2	0.242924	24.2924			7.629	0.155114	15.5114			67.1	0.158033	15.8033
	9.033	0.243008	24.3008		154.4	0.243235	24.3235			7.629	0.155313	15.5313			67.1	0.158236	15.8236
	9.033	0.243319	24.3319		154.4	0.243546	24.3546			7.69	0.155511	15.5511			67.1	0.158438	15.8438
	9.033	0.24363	24.363		154.6	0.243857	24.3857			7.69	0.15571	15.571			67.2	0.15864	15.864
	9.033	0.24394	24.394		154.6	0.244168	24.4168			7.69	0.155909	15.5909			67.2	0.158843	15.8843
	9.033	0.244251	24.4251		155.3	0.244479	24.4479			7.69	0.156107	15.6107			67.2	0.159045	15.9045
	9.033	0.244562	24.4562		155.4	0.24479	24.479			7.69	0.156306	15.6306			67.3	0.159247	15.9247
	9.033	0.244873	24.4873		155.5	0.245101	24.5101			7.69	0.156504	15.6504			67.3	0.15945	15.945
	9.033	0.245183	24.5183		155.7	0.245412	24.5412			7.69	0.156703	15.6703			67.4	0.159652	15.9652
	9.033	0.245494	24.5494		155.8	0.245723	24.5723			7.69	0.156902	15.6902			67.5	0.159854	15.9854
	9.033	0.245805	24.5805		156.3	0.246034	24.6034			7.69	0.1571	15.71			67.5	0.160057	16.0057
	9.033	0.246116	24.6116		156.7	0.246345	24.6345			7.69	0.157299	15.7299			67.6	0.160259	16.0259
	9.033	0.246426	24.6426		156.8	0.246656	24.6656			7.69	0.157498	15.7498			67.6	0.160461	16.0461
	9.033	0.246737	24.6737		156.9	0.246967	24.6967			7.69	0.157696	15.7696			67.8	0.160664	16.0664
	9.033	0.247048	24.7048		157.1	0.247278	24.7278			7.69	0.157895	15.7895			67.9	0.160866	16.0866
	9.033	0.247359	24.7359		157.1	0.247589	24.7589			7.69	0.158093	15.8093			68	0.161068	16.1068
	9.033	0.247669	24.7669		157.3	0.2479	24.79			7.69	0.158292	15.8292			68.1	0.161271	16.1271
	9.033	0.24798	24.798		157.4	0.248212	24.8212			7.69	0.158491	15.8491			68.2	0.161473	16.1473
	9.033	0.248291	24.8291		157.4	0.248523	24.8523			7.69	0.158689	15.8689			68.3	0.161675	16.1675
	9.033	0.248602	24.8602		157.5	0.248834	24.8834			7.69	0.158888	15.8888			68.4	0.161878	16.1878
	9.033	0.248912	24.8912		157.6	0.249145	24.9145			7.69	0.159086	15.9086			68.5	0.16208	16.208
	9.033	0.249223	24.9223		157.9	0.249456	24.9456			7.69	0.159285	15.9285			68.5	0.162282	16.2282
	9.033	0.249534	24.9534		158.7	0.249767	24.9767			7.69	0.159484	15.9484			68.5	0.162485	16.2485
	9.033	0.249845	24.9845		159.6	0.250078	25.0078			7.69	0.159682	15.9682			68.6	0.162687	16.2687
	9.033	0.250155	25.0155		159.8	0.250389	25.0389			7.69	0.159881	15.9881			68.8	0.16289	16.289
	9.033	0.250466	25.0466		160.2	0.2507	25.07			7.69	0.160079	16.0079			68.9	0.163092	16.3092
	9.094	0.250777	25.0777		160.4	0.251011	25.1011			7.69	0.160278	16.0278			69	0.163294	16.3294
	9.094	0.251088	25.1088		160.4	0.251322	25.1322			7.69	0.160477	16.0477			69.1	0.163497	16.3497
	9.094	0.251398	25.1398		160.4	0.251633	25.1633			7.69	0.160675	16.0675			69.2	0.163699	16.3699
	9.094	0.251709	25.1709		160.7	0.251944	25.1944			7.69	0.160874	16.0874			69.3	0.163901	16.3901
	9.094	0.25202	25.202		160.7	0.252255	25.2255			7.69	0.161072	16.1072			69.3	0.164104	16.4104
	9.094	0.252331	25.2331		161	0.252566	25.2566			7.69	0.161271	16.1271			69.4	0.164306	16.4306
	9.094	0.252641	25.2641		161.5	0.252877	25.2877			7.69	0.16147	16.147			69.4	0.164508	16.4508
	9.094	0.252952	25.2952		161.7	0.253188	25.3188			7.69	0.161668	16.1668			69.4	0.164711	16.4711
	9.094	0.253263	25.3263		161.7	0.253499	25.3499			7.69	0.161867	16.1867			69.4	0.164913	16.4913
	9.094	0.253574	25.3574		161.7	0.25381	25.381			7.69	0.162066	16.2066			69.6	0.165115	16.5115
	9.094	0.253884	25.3884		162.1	0.254121	25.4121			7.69	0.162264	16.2264			69.7	0.165318	16.5318
	9.094	0.254195	25.4195		162.2	0.254432	25.4432			7.69	0.162463	16.2463			69.7	0.16552	16.552
	9.094	0.254506	25.4506		162.3	0.254743	25.4743			7.69	0.162661	16.2661			69.8	0.165722	16.5722
	9.094	0.254817	25.4817		162.5	0.255054	25.5054			7.69	0.16286	16.286			70	0.165925	16.5925
	9.094	0.255127	25.5127		162.8	0.255365	25.5365			7.69	0.163059	16.3059			70	0.166127	16.6127
	9.094	0.255438	25.5438		163.1	0.255677	25.5677			7.69	0.163257	16.3257			70	0.166329	16.6329
	9.094	0.255749	25.5749		163.5	0.255988	25.5988			7.69	0.163456	16.3456			70.1	0.166532	16.6532
	9.094	0.25606	25.606		163.6	0.256299	25.6299			7.751	0.163654	16.3654			70.2	0.166734	16.6734
	9.155	0.25637	25.637		164	0.25661	25.661			7.751	0.163853	16.3853			70.3	0.166936	16.6936
	9.155	0.256681	25.6681		164.2	0.256921	25.6921			7.751	0.164052	16.4052			70.3	0.167139	16.7139
	9.155	0.256992	25.6992		164.3	0.257232	25.7232			7.751	0.16425	16.425			70.5	0.167341	16.7341
	9.155	0.257303	25.7303		164.3	0.257543	25.7543			7.751	0.164449	16.4449			70.6	0.167544	16.7544
	9.155	0.257613	25.7613		164.3	0.257854	25.7854			7.751	0.164647	16.4647			70.8	0.167746	16.7746
	9.155	0.257924	25.7924		164.5	0.258165	25.8165			7.751	0.164846	16.4846			70.8	0.167948	16.7948
	9.155	0.258235	25.8235		164.5	0.258476	25.8476			7.751	0.165045	16.5045			71	0.168151	16.8151
	9.155	0.258546	25.8546		164.8	0.258787	25.8787			7.751	0.165243	16.5243			71.1	0.168353	16.8353
	9.155	0.258856	25.8856		164.8	0.259098	25.9098			7.751	0.165442	16.5442			71.3	0.168555	16.8555
	9.155	0.259167	25.9167		165	0.259409	25.9409			7.751	0.165641	16.5641			71.3	0.168758	16.8758
	9.155	0.259478	25.9478		165.1	0.25972	25.972			7.751	0.165839	16.5839			71.3	0.16896	16.896
	9.155	0.259789	25.9789		165.2	0.260031	26.0031			7.751	0.166038	16.6038			71.3	0.169162	16.9162
	9.155	0.260099	26.0099		165.2	0.260342	26.0342			7.751	0.166236	16.6236			71.4	0.169365	16.9365
	9.155	0.26041	26.041		165.3	0.260653	26.0653			7.751	0.166435	16.6435			71.4	0.169567	16.9567
	9.155	0.260721	26.0721		165.3	0.260964	26.0964			7.751	0.166634	16.6634			71.5	0.169769	16.9769
	9.155	0.261032	26.1032		165.5	0.261275	26.1275			7.751	0.166832	16.6832			71.7	0.169972	16.9972
	9.155	0.261342	26.1342		165.7	0.261586	26.1586			7.751	0.167031	16.7031			71.7	0.170174	17.0174
	9.155	0.261653	26.1653		165.8	0.261897	26.1897			7.751	0.167229	16.7229			71.7	0.170376	17.0376
	9.155	0.261964	26.1964		165.8	0.262208	26.2208			7.751	0.167428	16.7428			71.7	0.170579	17.0579
	9.155	0.262275	26.2275		165.9	0.262519	26.2519			7.751	0.167627	16.7627			71.8	0.170781	17.0781
	9.155	0.262585	26.2585		165.9	0.26283	26.283			7.751	0.167825	16.7825			71.8	0.170983	17.0983
	9.155	0.262896	26.2896		165.9	0.263142	26.3142			7.751	0.168024	16.8024			71.9	0.171186	17.1186
	9.155	0.263207	26.3207		165.9	0.263453	26.3453			7.751	0.168222	16.8222			72	0.171388	17.1388
	9.155	0.263518	26.3518		166	0.263764	26.3764			7.751	0.168421	16.8421			72	0.17159	17.159
	9.155	0.263828	26.3828		166.2	0.264075	26.4075			7.751	0.16862	16.862			72	0.171793	17.1793
	9.155	0.264139	26.4139		166.4	0.264386	26.4386			7.751	0.168818	16.8818			72.1	0.171995	17.1995
	9.155	0.26445	26.445		166.4	0.264697	26.4697			7.751	0.169017	16.9017			72.1	0.172197	17.2197
	9.155	0.264761	26.4761		167.1	0.265008	26.5008			7.751	0.169215	16.9215			72.2	0.1724	17.24
	9.155	0.265071	26.5071		167.5	0.265319	26.5319			7.751	0.169414	16.9414			72.4	0.172602	17.2602
	9.155	0.265382	26.5382		167.9	0.26563	26.563			7.751	0.169613	16.9613			72.5	0.172805	17.2805
	9.155	0.265693	26.5693		168.1	0.265941	26.5941			7.813	0.169811	16.9811			72.5	0.173007	17.3007
	9.216	0.266004	26.6004		168.3	0.266252	26.6252			7.813	0.17001	17.001			72.7	0.173209	17.3209
	9.216	0.266314	26.6314		168.5	0.266563	26.6563			7.813	0.170209	17.0209			72.8	0.173412	17.3412
	9.216	0.266625	26.6625		168.7	0.266874	26.6874			7.813	0.170407	17.0407			72.8	0.173614	17.3614
	9.216	0.266936	26.6936		168.8	0.267185	26.7185			7.813	0.170606	17.0606			72.8	0.173816	17.3816
	9.216	0.267247	26.7247		169	0.267496	26.7496			7.813	0.170804	17.0804			72.9	0.174019	17.4019
	9.216	0.267557	26.7557		169.3	0.267807	26.7807			7.813	0.171003	17.1003			73	0.174221	17.4221
	9.216	0.267868	26.7868		169.3	0.268118	26.8118			7.813	0.171202	17.1202			73.1	0.174423	17.4423
	9.216	0.268179	26.8179		169.3	0.268429	26.8429			7.813	0.1714	17.14			73.1	0.174626	17.4626
	9.216	0.26849	26.849		169.5	0.26874	26.874			7.813	0.171599	17.1599			73.1	0.174828	17.4828
	9.216	0.2688	26.88		169.9	0.269051	26.9051			7.813	0.171797	17.1797			73.1	0.17503	17.503
	9.216	0.269111	26.9111		170	0.269362	26.9362			7.813	0.171996	17.1996			73.2	0.175233	17.5233
	9.216	0.269422	26.9422		170.3	0.269673	26.9673			7.813	0.172195	17.2195			73.3	0.175435	17.5435
	9.216	0.269733	26.9733		170.3	0.269984	26.9984			7.813	0.172393	17.2393			73.3	0.175637	17.5637
	9.216	0.270044	27.0044		170.4	0.270295	27.0295			7.813	0.172592	17.2592			73.5	0.17584	17.584
	9.216	0.270354	27.0354		170.4	0.270607	27.0607			7.813	0.17279	17.279			73.5	0.176042	17.6042
	9.216	0.270665	27.0665		170.5	0.270918	27.0918			7.813	0.172989	17.2989			73.5	0.176244	17.6244
	9.216	0.270976	27.0976		170.9	0.271229	27.1229			7.813	0.173188	17.3188			73.5	0.176447	17.6447
	9.216	0.271287	27.1287		171.4	0.27154	27.154			7.813	0.173386	17.3386			73.5	0.176649	17.6649
	9.216	0.271597	27.1597		171.4	0.271851	27.1851			7.813	0.173585	17.3585			73.6	0.176851	17.6851
	9.216	0.271908	27.1908		171.5	0.272162	27.2162			7.813	0.173784	17.3784			73.6	0.177054	17.7054
	9.216	0.272219	27.2219		171.5	0.272473	27.2473			7.813	0.173982	17.3982			73.8	0.177256	17.7256
	9.216	0.27253	27.253		171.5	0.272784	27.2784			7.813	0.174181	17.4181			73.9	0.177459	17.7459
	9.216	0.27284	27.284		171.5	0.273095	27.3095			7.813	0.174379	17.4379			73.9	0.177661	17.7661
	9.216	0.273151	27.3151		171.7	0.273406	27.3406			7.813	0.174578	17.4578			74	0.177863	17.7863
	9.216	0.273462	27.3462		171.8	0.273717	27.3717			7.813	0.174777	17.4777			74	0.178066	17.8066
	9.216	0.273773	27.3773		172.2	0.274028	27.4028			7.813	0.174975	17.4975			74.2	0.178268	17.8268
	9.216	0.274083	27.4083		172.4	0.274339	27.4339			7.813	0.175174	17.5174			74.3	0.17847	17.847
	9.216	0.274394	27.4394		172.5	0.27465	27.465			7.813	0.175372	17.5372			74.4	0.178673	17.8673
	9.216	0.274705	27.4705		173	0.274961	27.4961			7.813	0.175571	17.5571			74.5	0.178875	17.8875
	9.216	0.275016	27.5016		173.2	0.275272	27.5272			7.813	0.17577	17.577			74.5	0.179077	17.9077
	9.216	0.275326	27.5326		173.5	0.275583	27.5583			7.874	0.175968	17.5968			74.6	0.17928	17.928
	9.216	0.275637	27.5637		173.7	0.275894	27.5894			7.874	0.176167	17.6167			74.6	0.179482	17.9482
	9.216	0.275948	27.5948		173.8	0.276205	27.6205			7.874	0.176365	17.6365			75	0.179684	17.9684
	9.216	0.276259	27.6259		173.8	0.276516	27.6516			7.874	0.176564	17.6564			75	0.179887	17.9887
	9.216	0.276569	27.6569		174.2	0.276827	27.6827			7.874	0.176763	17.6763			75	0.180089	18.0089
	9.277	0.27688	27.688		174.3	0.277138	27.7138			7.874	0.176961	17.6961			75	0.180291	18.0291
	9.277	0.277191	27.7191		174.5	0.277449	27.7449			7.874	0.17716	17.716			75.2	0.180494	18.0494
	9.277	0.277502	27.7502		174.5	0.27776	27.776			7.874	0.177358	17.7358			75.2	0.180696	18.0696
	9.277	0.277812	27.7812		174.6	0.278072	27.8072			7.874	0.177557	17.7557			75.3	0.180898	18.0898
	9.277	0.278123	27.8123		174.6	0.278383	27.8383			7.874	0.177756	17.7756			75.3	0.181101	18.1101
	9.277	0.278434	27.8434		174.7	0.278694	27.8694			7.874	0.177954	17.7954			75.3	0.181303	18.1303
	9.277	0.278745	27.8745		174.8	0.279005	27.9005			7.874	0.178153	17.8153			75.4	0.181505	18.1505
	9.277	0.279055	27.9055		174.9	0.279316	27.9316			7.874	0.178352	17.8352			75.4	0.181708	18.1708
	9.277	0.279366	27.9366		174.9	0.279627	27.9627			7.874	0.17855	17.855			75.4	0.18191	18.191
	9.277	0.279677	27.9677		175	0.279938	27.9938			7.874	0.178749	17.8749			75.5	0.182113	18.2113
	9.277	0.279988	27.9988		175	0.280249	28.0249			7.874	0.178947	17.8947			75.5	0.182315	18.2315
	9.277	0.280298	28.0298		175.1	0.28056	28.056			7.874	0.179146	17.9146			75.5	0.182517	18.2517
	9.277	0.280609	28.0609		175.1	0.280871	28.0871			7.874	0.179345	17.9345			75.5	0.18272	18.272
	9.277	0.28092	28.092		175.5	0.281182	28.1182			7.874	0.179543	17.9543			75.6	0.182922	18.2922
	9.277	0.281231	28.1231		176	0.281493	28.1493			7.874	0.179742	17.9742			75.7	0.183124	18.3124
	9.277	0.281541	28.1541		176.1	0.281804	28.1804			7.874	0.17994	17.994			75.7	0.183327	18.3327
	9.277	0.281852	28.1852		176.4	0.282115	28.2115			7.874	0.180139	18.0139			76	0.183529	18.3529
	9.277	0.282163	28.2163		176.7	0.282426	28.2426			7.874	0.180338	18.0338			76	0.183731	18.3731
	9.277	0.282474	28.2474		176.9	0.282737	28.2737			7.874	0.180536	18.0536			76	0.183934	18.3934
	9.277	0.282784	28.2784		176.9	0.283048	28.3048			7.874	0.180735	18.0735			76.2	0.184136	18.4136
	9.277	0.283095	28.3095		177.2	0.283359	28.3359			7.874	0.180933	18.0933			76.2	0.184338	18.4338
	9.277	0.283406	28.3406		177.3	0.28367	28.367			7.874	0.181132	18.1132			76.2	0.184541	18.4541
	9.338	0.283717	28.3717		177.5	0.283981	28.3981			7.874	0.181331	18.1331			76.4	0.184743	18.4743
	9.338	0.284027	28.4027		177.5	0.284292	28.4292			7.874	0.181529	18.1529			76.4	0.184945	18.4945
	9.338	0.284338	28.4338		177.8	0.284603	28.4603			7.874	0.181728	18.1728			76.4	0.185148	18.5148
	9.338	0.284649	28.4649		178.2	0.284914	28.4914			7.874	0.181927	18.1927			76.5	0.18535	18.535
	9.338	0.28496	28.496		178.2	0.285226	28.5226			7.874	0.182125	18.2125			76.5	0.185552	18.5552
	9.338	0.28527	28.527		178.3	0.285537	28.5537			7.874	0.182324	18.2324			76.6	0.185755	18.5755
	9.338	0.285581	28.5581		178.4	0.285848	28.5848			7.874	0.182522	18.2522			76.6	0.185957	18.5957
	9.338	0.285892	28.5892		178.8	0.286159	28.6159			7.935	0.182721	18.2721			76.8	0.186159	18.6159
	9.338	0.286203	28.6203		178.9	0.28647	28.647			7.935	0.18292	18.292			76.8	0.186362	18.6362
	9.338	0.286513	28.6513		179.3	0.286781	28.6781			7.935	0.183118	18.3118			76.9	0.186564	18.6564
	9.338	0.286824	28.6824		179.6	0.287092	28.7092			7.935	0.183317	18.3317			77	0.186766	18.6766
	9.338	0.287135	28.7135		179.8	0.287403	28.7403			7.935	0.183515	18.3515			77	0.186969	18.6969
	9.338	0.287446	28.7446		179.9	0.287714	28.7714			7.935	0.183714	18.3714			77	0.187171	18.7171
	9.338	0.287756	28.7756		180.6	0.288025	28.8025			7.935	0.183913	18.3913			77	0.187374	18.7374
	9.338	0.288067	28.8067		182	0.288336	28.8336			7.935	0.184111	18.4111			77	0.187576	18.7576
	9.338	0.288378	28.8378		182.5	0.288647	28.8647			7.935	0.18431	18.431			77.1	0.187778	18.7778
	9.338	0.288689	28.8689		182.8	0.288958	28.8958			7.935	0.184508	18.4508			77.2	0.187981	18.7981
	9.338	0.288999	28.8999		182.9	0.289269	28.9269			7.935	0.184707	18.4707			77.2	0.188183	18.8183
	9.338	0.28931	28.931		183.1	0.28958	28.958			7.935	0.184906	18.4906			77.3	0.188385	18.8385
	9.338	0.289621	28.9621		183.2	0.289891	28.9891			7.935	0.185104	18.5104			77.3	0.188588	18.8588
	9.338	0.289932	28.9932		183.2	0.290202	29.0202			7.935	0.185303	18.5303			77.5	0.18879	18.879
	9.399	0.290242	29.0242		183.3	0.290513	29.0513			7.935	0.185501	18.5501			77.9	0.188992	18.8992
	9.399	0.290553	29.0553		183.5	0.290824	29.0824			7.935	0.1857	18.57			77.9	0.189195	18.9195
	9.399	0.290864	29.0864		183.5	0.291135	29.1135			7.935	0.185899	18.5899			78	0.189397	18.9397
	9.399	0.291175	29.1175		184.4	0.291446	29.1446			7.935	0.186097	18.6097			78	0.189599	18.9599
	9.399	0.291485	29.1485		184.5	0.291757	29.1757			7.935	0.186296	18.6296			78	0.189802	18.9802
	9.399	0.291796	29.1796		184.5	0.292068	29.2068			7.935	0.186495	18.6495			78	0.190004	19.0004
	9.399	0.292107	29.2107		185	0.292379	29.2379			7.935	0.186693	18.6693			78.1	0.190206	19.0206
	9.399	0.292418	29.2418		185.1	0.292691	29.2691			7.935	0.186892	18.6892			78.2	0.190409	19.0409
	9.399	0.292728	29.2728		185.4	0.293002	29.3002			7.935	0.18709	18.709			78.2	0.190611	19.0611
	9.399	0.293039	29.3039		185.4	0.293313	29.3313			7.935	0.187289	18.7289			78.2	0.190813	19.0813
	9.399	0.29335	29.335		185.5	0.293624	29.3624			7.935	0.187488	18.7488			78.2	0.191016	19.1016
	9.399	0.293661	29.3661		186.6	0.293935	29.3935			7.935	0.187686	18.7686			78.2	0.191218	19.1218
	9.399	0.293971	29.3971		186.7	0.294246	29.4246			7.935	0.187885	18.7885			78.3	0.19142	19.142
	9.399	0.294282	29.4282		187.2	0.294557	29.4557			7.935	0.188083	18.8083			78.4	0.191623	19.1623
	9.46	0.294593	29.4593		187.2	0.294868	29.4868			7.935	0.188282	18.8282			78.5	0.191825	19.1825
	9.46	0.294904	29.4904		187.4	0.295179	29.5179			7.935	0.188481	18.8481			78.5	0.192028	19.2028
	9.46	0.295214	29.5214		187.4	0.29549	29.549			7.935	0.188679	18.8679			78.7	0.19223	19.223
	9.46	0.295525	29.5525		187.5	0.295801	29.5801			7.996	0.188878	18.8878			78.8	0.192432	19.2432
	9.46	0.295836	29.5836		188	0.296112	29.6112			7.996	0.189076	18.9076			78.9	0.192635	19.2635
	9.46	0.296147	29.6147		188	0.296423	29.6423			7.996	0.189275	18.9275			78.9	0.192837	19.2837
	9.46	0.296457	29.6457		188.2	0.296734	29.6734			7.996	0.189474	18.9474			79	0.193039	19.3039
	9.46	0.296768	29.6768		188.4	0.297045	29.7045			7.996	0.189672	18.9672			79.1	0.193242	19.3242
	9.46	0.297079	29.7079		188.4	0.297356	29.7356			7.996	0.189871	18.9871			79.1	0.193444	19.3444
	9.46	0.29739	29.739		188.6	0.297667	29.7667			7.996	0.19007	19.007			79.1	0.193646	19.3646
	9.46	0.2977	29.77		188.7	0.297978	29.7978			7.996	0.190268	19.0268			79.1	0.193849	19.3849
	9.46	0.298011	29.8011		189	0.298289	29.8289			7.996	0.190467	19.0467			79.3	0.194051	19.4051
	9.46	0.298322	29.8322		189.2	0.2986	29.86			7.996	0.190665	19.0665			79.3	0.194253	19.4253
	9.46	0.298633	29.8633		189.5	0.298911	29.8911			7.996	0.190864	19.0864			79.3	0.194456	19.4456
	9.46	0.298943	29.8943		189.5	0.299222	29.9222			7.996	0.191063	19.1063			79.4	0.194658	19.4658
	9.46	0.299254	29.9254		189.5	0.299533	29.9533			7.996	0.191261	19.1261			79.4	0.19486	19.486
	9.46	0.299565	29.9565		189.7	0.299844	29.9844			7.996	0.19146	19.146			79.5	0.195063	19.5063
	9.46	0.299876	29.9876		189.9	0.300156	30.0156			7.996	0.191658	19.1658			79.5	0.195265	19.5265
	9.46	0.300186	30.0186		190.4	0.300467	30.0467			7.996	0.191857	19.1857			79.6	0.195467	19.5467
	9.521	0.300497	30.0497		190.6	0.300778	30.0778			7.996	0.192056	19.2056			79.6	0.19567	19.567
	9.521	0.300808	30.0808		190.6	0.301089	30.1089			7.996	0.192254	19.2254			79.7	0.195872	19.5872
	9.521	0.301119	30.1119		191	0.3014	30.14			7.996	0.192453	19.2453			79.7	0.196074	19.6074
	9.521	0.301429	30.1429		191.1	0.301711	30.1711			7.996	0.192651	19.2651			79.7	0.196277	19.6277
	9.521	0.30174	30.174		191.6	0.302022	30.2022			7.996	0.19285	19.285			79.8	0.196479	19.6479
	9.521	0.302051	30.2051		192.2	0.302333	30.2333			7.996	0.193049	19.3049			79.9	0.196682	19.6682
	9.521	0.302362	30.2362		192.2	0.302644	30.2644			7.996	0.193247	19.3247			80	0.196884	19.6884
	9.521	0.302672	30.2672		192.3	0.302955	30.2955			7.996	0.193446	19.3446			80	0.197086	19.7086
	9.521	0.302983	30.2983		192.4	0.303266	30.3266			7.996	0.193644	19.3644			80	0.197289	19.7289
	9.521	0.303294	30.3294		192.6	0.303577	30.3577			7.996	0.193843	19.3843			80.1	0.197491	19.7491
	9.521	0.303605	30.3605		192.7	0.303888	30.3888			7.996	0.194042	19.4042			80.3	0.197693	19.7693
	9.521	0.303915	30.3915		192.8	0.304199	30.4199			7.996	0.19424	19.424			80.3	0.197896	19.7896
	9.521	0.304226	30.4226		193.2	0.30451	30.451			7.996	0.194439	19.4439			80.4	0.198098	19.8098
	9.521	0.304537	30.4537		193.6	0.304821	30.4821			7.996	0.194638	19.4638			80.5	0.1983	19.83
	9.521	0.304848	30.4848		193.7	0.305132	30.5132			7.996	0.194836	19.4836			80.5	0.198503	19.8503
	9.521	0.305158	30.5158		193.8	0.305443	30.5443			7.996	0.195035	19.5035			80.6	0.198705	19.8705
	9.521	0.305469	30.5469		194.5	0.305754	30.5754			8.057	0.195233	19.5233			80.6	0.198907	19.8907
	9.521	0.30578	30.578		194.7	0.306065	30.6065			8.057	0.195432	19.5432			80.8	0.19911	19.911
	9.521	0.306091	30.6091		195	0.306376	30.6376			8.057	0.195631	19.5631			80.9	0.199312	19.9312
	9.521	0.306401	30.6401		195.1	0.306687	30.6687			8.057	0.195829	19.5829			80.9	0.199514	19.9514
	9.521	0.306712	30.6712		195.3	0.306998	30.6998			8.057	0.196028	19.6028			81	0.199717	19.9717
	9.521	0.307023	30.7023		195.4	0.307309	30.7309			8.057	0.196226	19.6226			81.1	0.199919	19.9919
	9.583	0.307334	30.7334		195.5	0.307621	30.7621			8.057	0.196425	19.6425			81.1	0.200121	20.0121
	9.583	0.307644	30.7644		195.7	0.307932	30.7932			8.057	0.196624	19.6624			81.2	0.200324	20.0324
	9.583	0.307955	30.7955		195.7	0.308243	30.8243			8.057	0.196822	19.6822			81.3	0.200526	20.0526
	9.583	0.308266	30.8266		195.7	0.308554	30.8554			8.057	0.197021	19.7021			81.3	0.200728	20.0728
	9.583	0.308577	30.8577		195.7	0.308865	30.8865			8.057	0.197219	19.7219			81.5	0.200931	20.0931
	9.583	0.308888	30.8888		195.8	0.309176	30.9176			8.057	0.197418	19.7418			81.6	0.201133	20.1133
	9.583	0.309198	30.9198		196.5	0.309487	30.9487			8.057	0.197617	19.7617			81.8	0.201335	20.1335
	9.583	0.309509	30.9509		196.8	0.309798	30.9798			8.057	0.197815	19.7815			81.9	0.201538	20.1538
	9.583	0.30982	30.982		197	0.310109	31.0109			8.057	0.198014	19.8014			81.9	0.20174	20.174
	9.583	0.310131	31.0131		197.1	0.31042	31.042			8.057	0.198213	19.8213			81.9	0.201943	20.1943
	9.583	0.310441	31.0441		197.1	0.310731	31.0731			8.057	0.198411	19.8411			82	0.202145	20.2145
	9.583	0.310752	31.0752		197.2	0.311042	31.1042			8.057	0.19861	19.861			82.1	0.202347	20.2347
	9.583	0.311063	31.1063		197.3	0.311353	31.1353			8.057	0.198808	19.8808			82.1	0.20255	20.255
	9.583	0.311374	31.1374		197.4	0.311664	31.1664			8.057	0.199007	19.9007			82.2	0.202752	20.2752
	9.583	0.311684	31.1684		197.7	0.311975	31.1975			8.057	0.199206	19.9206			82.3	0.202954	20.2954
	9.583	0.311995	31.1995		198.1	0.312286	31.2286			8.057	0.199404	19.9404			82.4	0.203157	20.3157
	9.583	0.312306	31.2306		198.5	0.312597	31.2597			8.057	0.199603	19.9603			82.5	0.203359	20.3359
	9.583	0.312617	31.2617		198.7	0.312908	31.2908			8.057	0.199801	19.9801			82.6	0.203561	20.3561
	9.583	0.312927	31.2927		198.9	0.313219	31.3219			8.057	0.2	20			82.6	0.203764	20.3764
	9.583	0.313238	31.3238		199	0.31353	31.353			8.057	0.200199	20.0199			82.7	0.203966	20.3966
	9.583	0.313549	31.3549		199	0.313841	31.3841			8.057	0.200397	20.0397			83	0.204168	20.4168
	9.644	0.31386	31.386		199	0.314152	31.4152			8.057	0.200596	20.0596			83	0.204371	20.4371
	9.644	0.31417	31.417		199.2	0.314463	31.4463			8.057	0.200794	20.0794			83.1	0.204573	20.4573
	9.644	0.314481	31.4481		199.6	0.314774	31.4774			8.118	0.200993	20.0993			83.1	0.204775	20.4775
	9.644	0.314792	31.4792		199.6	0.315086	31.5086			8.118	0.201192	20.1192			83.2	0.204978	20.4978
	9.644	0.315103	31.5103		199.8	0.315397	31.5397			8.118	0.20139	20.139			83.3	0.20518	20.518
	9.644	0.315413	31.5413		199.8	0.315708	31.5708			8.118	0.201589	20.1589			83.3	0.205382	20.5382
	9.644	0.315724	31.5724		199.8	0.316019	31.6019			8.118	0.201787	20.1787			83.4	0.205585	20.5585
	9.644	0.316035	31.6035		199.9	0.31633	31.633			8.118	0.201986	20.1986			83.4	0.205787	20.5787
	9.644	0.316346	31.6346		200.1	0.316641	31.6641			8.118	0.202185	20.2185			83.5	0.205989	20.5989
	9.644	0.316656	31.6656		200.2	0.316952	31.6952			8.118	0.202383	20.2383			83.5	0.206192	20.6192
	9.644	0.316967	31.6967		201.2	0.317263	31.7263			8.118	0.202582	20.2582			83.5	0.206394	20.6394
	9.644	0.317278	31.7278		201.3	0.317574	31.7574			8.118	0.202781	20.2781			83.6	0.206597	20.6597
	9.644	0.317589	31.7589		201.4	0.317885	31.7885			8.118	0.202979	20.2979			83.6	0.206799	20.6799
	9.644	0.317899	31.7899		201.9	0.318196	31.8196			8.118	0.203178	20.3178			83.7	0.207001	20.7001
	9.644	0.31821	31.821		202.4	0.318507	31.8507			8.118	0.203376	20.3376			83.8	0.207204	20.7204
	9.644	0.318521	31.8521		202.8	0.318818	31.8818			8.118	0.203575	20.3575			83.8	0.207406	20.7406
	9.644	0.318832	31.8832		203.1	0.319129	31.9129			8.118	0.203774	20.3774			83.8	0.207608	20.7608
	9.644	0.319142	31.9142		203.5	0.31944	31.944			8.118	0.203972	20.3972			83.9	0.207811	20.7811
	9.644	0.319453	31.9453		204	0.319751	31.9751			8.118	0.204171	20.4171			83.9	0.208013	20.8013
	9.644	0.319764	31.9764		204.5	0.320062	32.0062			8.118	0.204369	20.4369			83.9	0.208215	20.8215
	9.644	0.320075	32.0075		204.7	0.320373	32.0373			8.118	0.204568	20.4568			83.9	0.208418	20.8418
	9.644	0.320385	32.0385		204.9	0.320684	32.0684			8.118	0.204767	20.4767			84.1	0.20862	20.862
	9.644	0.320696	32.0696		205.2	0.320995	32.0995			8.118	0.204965	20.4965			84.2	0.208822	20.8822
	9.644	0.321007	32.1007		205.2	0.321306	32.1306			8.118	0.205164	20.5164			84.2	0.209025	20.9025
	9.644	0.321318	32.1318		205.5	0.321617	32.1617			8.118	0.205362	20.5362			84.3	0.209227	20.9227
	9.705	0.321628	32.1628		205.7	0.321928	32.1928			8.118	0.205561	20.5561			84.3	0.209429	20.9429
	9.705	0.321939	32.1939		205.8	0.32224	32.224			8.118	0.20576	20.576			84.3	0.209632	20.9632
	9.705	0.32225	32.225		205.9	0.322551	32.2551			8.118	0.205958	20.5958			84.4	0.209834	20.9834
	9.705	0.322561	32.2561		206.1	0.322862	32.2862			8.118	0.206157	20.6157			84.4	0.210036	21.0036
	9.705	0.322871	32.2871		206.5	0.323173	32.3173			8.118	0.206356	20.6356			84.5	0.210239	21.0239
	9.705	0.323182	32.3182		207	0.323484	32.3484			8.118	0.206554	20.6554			84.6	0.210441	21.0441
	9.705	0.323493	32.3493		207	0.323795	32.3795			8.118	0.206753	20.6753			84.7	0.210643	21.0643
	9.705	0.323804	32.3804		207.5	0.324106	32.4106			8.118	0.206951	20.6951			84.8	0.210846	21.0846
	9.705	0.324114	32.4114		207.6	0.324417	32.4417			8.118	0.20715	20.715			84.9	0.211048	21.1048
	9.705	0.324425	32.4425		207.7	0.324728	32.4728			8.179	0.207349	20.7349			84.9	0.211251	21.1251
	9.705	0.324736	32.4736		207.8	0.325039	32.5039			8.179	0.207547	20.7547			85.2	0.211453	21.1453
	9.705	0.325047	32.5047		208.2	0.32535	32.535			8.179	0.207746	20.7746			85.2	0.211655	21.1655
	9.705	0.325357	32.5357		208.3	0.325661	32.5661			8.179	0.207944	20.7944			85.2	0.211858	21.1858
	9.705	0.325668	32.5668		208.8	0.325972	32.5972			8.179	0.208143	20.8143			85.5	0.21206	21.206
	9.705	0.325979	32.5979		209.4	0.326283	32.6283			8.179	0.208342	20.8342			85.7	0.212262	21.2262
	9.705	0.32629	32.629		209.5	0.326594	32.6594			8.179	0.20854	20.854			85.7	0.212465	21.2465
	9.705	0.3266	32.66		209.5	0.326905	32.6905			8.179	0.208739	20.8739			85.7	0.212667	21.2667
	9.705	0.326911	32.6911		209.9	0.327216	32.7216			8.179	0.208937	20.8937			85.7	0.212869	21.2869
	9.705	0.327222	32.7222		210.3	0.327527	32.7527			8.179	0.209136	20.9136			85.7	0.213072	21.3072
	9.705	0.327533	32.7533		210.5	0.327838	32.7838			8.179	0.209335	20.9335			85.7	0.213274	21.3274
	9.705	0.327843	32.7843		210.7	0.328149	32.8149			8.179	0.209533	20.9533			85.8	0.213476	21.3476
	9.705	0.328154	32.8154		210.9	0.32846	32.846			8.179	0.209732	20.9732			85.8	0.213679	21.3679
	9.705	0.328465	32.8465		211.1	0.328771	32.8771			8.179	0.20993	20.993			85.9	0.213881	21.3881
	9.705	0.328776	32.8776		211.3	0.329082	32.9082			8.179	0.210129	21.0129			85.9	0.214083	21.4083
	9.705	0.329086	32.9086		211.5	0.329393	32.9393			8.179	0.210328	21.0328			86	0.214286	21.4286
	9.705	0.329397	32.9397		211.9	0.329705	32.9705			8.179	0.210526	21.0526			86.2	0.214488	21.4488
	9.705	0.329708	32.9708		211.9	0.330016	33.0016			8.179	0.210725	21.0725			86.3	0.21469	21.469
	9.705	0.330019	33.0019		212	0.330327	33.0327			8.179	0.210924	21.0924			86.4	0.214893	21.4893
	9.705	0.330329	33.0329		212.1	0.330638	33.0638			8.179	0.211122	21.1122			86.4	0.215095	21.5095
	9.705	0.33064	33.064		212.4	0.330949	33.0949			8.179	0.211321	21.1321			86.5	0.215297	21.5297
	9.705	0.330951	33.0951		212.6	0.33126	33.126			8.179	0.211519	21.1519			86.5	0.2155	21.55
	9.766	0.331262	33.1262		213.3	0.331571	33.1571			8.179	0.211718	21.1718			86.7	0.215702	21.5702
	9.766	0.331572	33.1572		213.5	0.331882	33.1882			8.179	0.211917	21.1917			86.8	0.215904	21.5904
	9.766	0.331883	33.1883		213.6	0.332193	33.2193			8.179	0.212115	21.2115			86.9	0.216107	21.6107
	9.766	0.332194	33.2194		213.6	0.332504	33.2504			8.179	0.212314	21.2314			87	0.216309	21.6309
	9.766	0.332505	33.2505		213.7	0.332815	33.2815			8.179	0.212512	21.2512			87.1	0.216512	21.6512
	9.766	0.332815	33.2815		213.9	0.333126	33.3126			8.24	0.212711	21.2711			87.1	0.216714	21.6714
	9.766	0.333126	33.3126		213.9	0.333437	33.3437			8.24	0.21291	21.291			87.2	0.216916	21.6916
	9.766	0.333437	33.3437		214.6	0.333748	33.3748			8.24	0.213108	21.3108			87.2	0.217119	21.7119
	9.766	0.333748	33.3748		214.9	0.334059	33.4059			8.24	0.213307	21.3307			87.2	0.217321	21.7321
	9.766	0.334058	33.4058		215.2	0.33437	33.437			8.24	0.213505	21.3505			87.4	0.217523	21.7523
	9.766	0.334369	33.4369		215.5	0.334681	33.4681			8.24	0.213704	21.3704			87.4	0.217726	21.7726
	9.766	0.33468	33.468		215.9	0.334992	33.4992			8.24	0.213903	21.3903			87.4	0.217928	21.7928
	9.766	0.334991	33.4991		215.9	0.335303	33.5303			8.24	0.214101	21.4101			87.5	0.21813	21.813
	9.766	0.335301	33.5301		216.4	0.335614	33.5614			8.24	0.2143	21.43			87.7	0.218333	21.8333
	9.766	0.335612	33.5612		216.5	0.335925	33.5925			8.24	0.214499	21.4499			87.7	0.218535	21.8535
	9.766	0.335923	33.5923		216.5	0.336236	33.6236			8.24	0.214697	21.4697			87.8	0.218737	21.8737
	9.766	0.336234	33.6234		217	0.336547	33.6547			8.24	0.214896	21.4896			87.8	0.21894	21.894
	9.827	0.336544	33.6544		217.3	0.336858	33.6858			8.24	0.215094	21.5094			88	0.219142	21.9142
	9.827	0.336855	33.6855		217.4	0.33717	33.717			8.24	0.215293	21.5293			88.1	0.219344	21.9344
	9.827	0.337166	33.7166		217.4	0.337481	33.7481			8.24	0.215492	21.5492			88.2	0.219547	21.9547
	9.827	0.337477	33.7477		218.1	0.337792	33.7792			8.24	0.21569	21.569			88.2	0.219749	21.9749
	9.827	0.337787	33.7787		218.1	0.338103	33.8103			8.24	0.215889	21.5889			88.3	0.219951	21.9951
	9.827	0.338098	33.8098		218.3	0.338414	33.8414			8.24	0.216087	21.6087			88.3	0.220154	22.0154
	9.827	0.338409	33.8409		218.4	0.338725	33.8725			8.24	0.216286	21.6286			88.3	0.220356	22.0356
	9.827	0.33872	33.872		219.5	0.339036	33.9036			8.24	0.216485	21.6485			88.4	0.220558	22.0558
	9.827	0.33903	33.903		219.7	0.339347	33.9347			8.24	0.216683	21.6683			88.4	0.220761	22.0761
	9.827	0.339341	33.9341		220	0.339658	33.9658			8.24	0.216882	21.6882			88.4	0.220963	22.0963
	9.827	0.339652	33.9652		220.1	0.339969	33.9969			8.24	0.21708	21.708			88.4	0.221166	22.1166
	9.827	0.339963	33.9963		220.2	0.34028	34.028			8.24	0.217279	21.7279			88.5	0.221368	22.1368
	9.827	0.340273	34.0273		220.3	0.340591	34.0591			8.24	0.217478	21.7478			88.7	0.22157	22.157
	9.827	0.340584	34.0584		220.3	0.340902	34.0902			8.24	0.217676	21.7676			88.8	0.221773	22.1773
	9.827	0.340895	34.0895		220.4	0.341213	34.1213			8.24	0.217875	21.7875			88.8	0.221975	22.1975
	9.888	0.341206	34.1206		220.7	0.341524	34.1524			8.24	0.218073	21.8073			88.9	0.222177	22.2177
	9.888	0.341516	34.1516		221.1	0.341835	34.1835			8.24	0.218272	21.8272			89	0.22238	22.238
	9.888	0.341827	34.1827		221.2	0.342146	34.2146			8.24	0.218471	21.8471			89.1	0.222582	22.2582
	9.888	0.342138	34.2138		221.4	0.342457	34.2457			8.24	0.218669	21.8669			89.1	0.222784	22.2784
	9.888	0.342449	34.2449		221.7	0.342768	34.2768			8.24	0.218868	21.8868			89.2	0.222987	22.2987
	9.888	0.342759	34.2759		221.9	0.343079	34.3079			8.24	0.219067	21.9067			89.3	0.223189	22.3189
	9.888	0.34307	34.307		222	0.34339	34.339			8.24	0.219265	21.9265			89.3	0.223391	22.3391
	9.888	0.343381	34.3381		222.3	0.343701	34.3701			8.24	0.219464	21.9464			89.3	0.223594	22.3594
	9.888	0.343692	34.3692		222.7	0.344012	34.4012			8.24	0.219662	21.9662			89.4	0.223796	22.3796
	9.888	0.344002	34.4002		222.7	0.344323	34.4323			8.24	0.219861	21.9861			89.5	0.223998	22.3998
	9.888	0.344313	34.4313		223.2	0.344635	34.4635			8.24	0.22006	22.006			89.5	0.224201	22.4201
	9.888	0.344624	34.4624		223.4	0.344946	34.4946			8.24	0.220258	22.0258			89.6	0.224403	22.4403
	9.888	0.344935	34.4935		223.8	0.345257	34.5257			8.301	0.220457	22.0457			89.6	0.224605	22.4605
	9.888	0.345245	34.5245		223.8	0.345568	34.5568			8.301	0.220655	22.0655			89.7	0.224808	22.4808
	9.888	0.345556	34.5556		224.3	0.345879	34.5879			8.301	0.220854	22.0854			89.8	0.22501	22.501
	9.888	0.345867	34.5867		225.1	0.34619	34.619			8.301	0.221053	22.1053			89.8	0.225212	22.5212
	9.888	0.346178	34.6178		225.1	0.346501	34.6501			8.301	0.221251	22.1251			89.8	0.225415	22.5415
	9.888	0.346489	34.6489		225.2	0.346812	34.6812			8.301	0.22145	22.145			89.9	0.225617	22.5617
	9.888	0.346799	34.6799		225.4	0.347123	34.7123			8.301	0.221648	22.1648			90	0.22582	22.582
	9.888	0.34711	34.711		225.8	0.347434	34.7434			8.301	0.221847	22.1847			90.1	0.226022	22.6022
	9.888	0.347421	34.7421		226.1	0.347745	34.7745			8.301	0.222046	22.2046			90.2	0.226224	22.6224
	9.949	0.347732	34.7732		226.2	0.348056	34.8056			8.301	0.222244	22.2244			90.3	0.226427	22.6427
	9.949	0.348042	34.8042		227	0.348367	34.8367			8.301	0.222443	22.2443			90.4	0.226629	22.6629
	9.949	0.348353	34.8353		227.2	0.348678	34.8678			8.301	0.222642	22.2642			90.4	0.226831	22.6831
	9.949	0.348664	34.8664		227.3	0.348989	34.8989			8.301	0.22284	22.284			90.5	0.227034	22.7034
	9.949	0.348975	34.8975		227.3	0.3493	34.93			8.301	0.223039	22.3039			90.6	0.227236	22.7236
	9.949	0.349285	34.9285		227.8	0.349611	34.9611			8.301	0.223237	22.3237			90.7	0.227438	22.7438
	9.949	0.349596	34.9596		227.8	0.349922	34.9922			8.301	0.223436	22.3436			90.7	0.227641	22.7641
	9.949	0.349907	34.9907		228.3	0.350233	35.0233			8.301	0.223635	22.3635			90.7	0.227843	22.7843
	9.949	0.350218	35.0218		228.4	0.350544	35.0544			8.301	0.223833	22.3833			90.8	0.228045	22.8045
	9.949	0.350528	35.0528		228.4	0.350855	35.0855			8.301	0.224032	22.4032			90.9	0.228248	22.8248
	9.949	0.350839	35.0839		228.6	0.351166	35.1166			8.301	0.22423	22.423			91	0.22845	22.845
	9.949	0.35115	35.115		228.7	0.351477	35.1477			8.301	0.224429	22.4429			91	0.228652	22.8652
	9.949	0.351461	35.1461		229.4	0.351788	35.1788			8.301	0.224628	22.4628			91	0.228855	22.8855
	9.949	0.351771	35.1771		229.8	0.3521	35.21			8.301	0.224826	22.4826			91.1	0.229057	22.9057
	9.949	0.352082	35.2082		230.1	0.352411	35.2411			8.362	0.225025	22.5025			91.1	0.229259	22.9259
	10.01	0.352393	35.2393		230.1	0.352722	35.2722			8.362	0.225223	22.5223			91.2	0.229462	22.9462
	10.01	0.352704	35.2704		230.1	0.353033	35.3033			8.362	0.225422	22.5422			91.3	0.229664	22.9664
	10.01	0.353014	35.3014		230.2	0.353344	35.3344			8.362	0.225621	22.5621			91.3	0.229866	22.9866
	10.01	0.353325	35.3325		230.5	0.353655	35.3655			8.362	0.225819	22.5819			91.4	0.230069	23.0069
	10.01	0.353636	35.3636		230.9	0.353966	35.3966			8.362	0.226018	22.6018			91.4	0.230271	23.0271
	10.01	0.353947	35.3947		230.9	0.354277	35.4277			8.362	0.226216	22.6216			91.5	0.230473	23.0473
	10.01	0.354257	35.4257		231	0.354588	35.4588			8.362	0.226415	22.6415			91.5	0.230676	23.0676
	10.01	0.354568	35.4568		231.2	0.354899	35.4899			8.362	0.226614	22.6614			91.7	0.230878	23.0878
	10.01	0.354879	35.4879		231.3	0.35521	35.521			8.362	0.226812	22.6812			91.9	0.231081	23.1081
	10.01	0.35519	35.519		231.4	0.355521	35.5521			8.362	0.227011	22.7011			92	0.231283	23.1283
	10.01	0.3555	35.55		231.9	0.355832	35.5832			8.362	0.22721	22.721			92.2	0.231485	23.1485
	10.01	0.355811	35.5811		231.9	0.356143	35.6143			8.362	0.227408	22.7408			92.2	0.231688	23.1688
	10.01	0.356122	35.6122		232.1	0.356454	35.6454			8.362	0.227607	22.7607			92.3	0.23189	23.189
	10.01	0.356433	35.6433		232.2	0.356765	35.6765			8.362	0.227805	22.7805			92.3	0.232092	23.2092
	10.01	0.356743	35.6743		232.2	0.357076	35.7076			8.362	0.228004	22.8004			92.3	0.232295	23.2295
	10.01	0.357054	35.7054		232.3	0.357387	35.7387			8.362	0.228203	22.8203			92.3	0.232497	23.2497
	10.01	0.357365	35.7365		232.3	0.357698	35.7698			8.362	0.228401	22.8401			92.4	0.232699	23.2699
	10.01	0.357676	35.7676		232.3	0.358009	35.8009			8.362	0.2286	22.86			92.6	0.232902	23.2902
	10.01	0.357986	35.7986		232.7	0.35832	35.832			8.362	0.228798	22.8798			92.6	0.233104	23.3104
	10.01	0.358297	35.8297		232.8	0.358631	35.8631			8.362	0.228997	22.8997			92.6	0.233306	23.3306
	10.01	0.358608	35.8608		233.1	0.358942	35.8942			8.362	0.229196	22.9196			92.9	0.233509	23.3509
	10.01	0.358919	35.8919		233.2	0.359253	35.9253			8.362	0.229394	22.9394			93.2	0.233711	23.3711
	10.01	0.359229	35.9229		233.5	0.359565	35.9565			8.362	0.229593	22.9593			93.3	0.233913	23.3913
	10.01	0.35954	35.954		233.5	0.359876	35.9876			8.362	0.229791	22.9791			93.3	0.234116	23.4116
	10.01	0.359851	35.9851		234	0.360187	36.0187			8.362	0.22999	22.999			93.3	0.234318	23.4318
	10.01	0.360162	36.0162		234	0.360498	36.0498			8.362	0.230189	23.0189			93.4	0.23452	23.452
	10.071	0.360472	36.0472		234.3	0.360809	36.0809			8.362	0.230387	23.0387			93.5	0.234723	23.4723
	10.071	0.360783	36.0783		234.9	0.36112	36.112			8.423	0.230586	23.0586			93.5	0.234925	23.4925
	10.071	0.361094	36.1094		235.4	0.361431	36.1431			8.423	0.230785	23.0785			93.5	0.235127	23.5127
	10.071	0.361405	36.1405		235.6	0.361742	36.1742			8.423	0.230983	23.0983			93.5	0.23533	23.533
	10.071	0.361715	36.1715		235.7	0.362053	36.2053			8.423	0.231182	23.1182			93.5	0.235532	23.5532
	10.071	0.362026	36.2026		235.7	0.362364	36.2364			8.423	0.23138	23.138			93.8	0.235735	23.5735
	10.071	0.362337	36.2337		236.4	0.362675	36.2675			8.423	0.231579	23.1579			94.1	0.235937	23.5937
	10.071	0.362648	36.2648		237	0.362986	36.2986			8.423	0.231778	23.1778			94.2	0.236139	23.6139
	10.071	0.362958	36.2958		237.3	0.363297	36.3297			8.423	0.231976	23.1976			94.2	0.236342	23.6342
	10.071	0.363269	36.3269		237.5	0.363608	36.3608			8.423	0.232175	23.2175			94.3	0.236544	23.6544
	10.071	0.36358	36.358		237.7	0.363919	36.3919			8.423	0.232373	23.2373			94.3	0.236746	23.6746
	10.071	0.363891	36.3891		237.9	0.36423	36.423			8.423	0.232572	23.2572			94.3	0.236949	23.6949
	10.071	0.364201	36.4201		237.9	0.364541	36.4541			8.423	0.232771	23.2771			94.4	0.237151	23.7151
	10.071	0.364512	36.4512		238.1	0.364852	36.4852			8.423	0.232969	23.2969			94.4	0.237353	23.7353
	10.071	0.364823	36.4823		238.2	0.365163	36.5163			8.423	0.233168	23.3168			94.5	0.237556	23.7556
	10.071	0.365134	36.5134		238.2	0.365474	36.5474			8.423	0.233366	23.3366			94.5	0.237758	23.7758
	10.071	0.365444	36.5444		238.4	0.365785	36.5785			8.423	0.233565	23.3565			94.6	0.23796	23.796
	10.071	0.365755	36.5755		238.7	0.366096	36.6096			8.423	0.233764	23.3764			94.6	0.238163	23.8163
	10.071	0.366066	36.6066		239.5	0.366407	36.6407			8.423	0.233962	23.3962			94.7	0.238365	23.8365
	10.071	0.366377	36.6377		239.6	0.366719	36.6719			8.423	0.234161	23.4161			94.8	0.238567	23.8567
	10.071	0.366687	36.6687		239.7	0.36703	36.703			8.423	0.234359	23.4359			94.8	0.23877	23.877
	10.071	0.366998	36.6998		239.8	0.367341	36.7341			8.423	0.234558	23.4558			94.9	0.238972	23.8972
	10.071	0.367309	36.7309		240.2	0.367652	36.7652			8.423	0.234757	23.4757			94.9	0.239174	23.9174
	10.071	0.36762	36.762		240.5	0.367963	36.7963			8.423	0.234955	23.4955			94.9	0.239377	23.9377
	10.132	0.36793	36.793		240.8	0.368274	36.8274			8.423	0.235154	23.5154			95	0.239579	23.9579
	10.132	0.368241	36.8241		240.8	0.368585	36.8585			8.423	0.235353	23.5353			95	0.239781	23.9781
	10.132	0.368552	36.8552		241	0.368896	36.8896			8.423	0.235551	23.5551			95	0.239984	23.9984
	10.132	0.368863	36.8863		241.1	0.369207	36.9207			8.423	0.23575	23.575			95	0.240186	24.0186
	10.132	0.369173	36.9173		241.2	0.369518	36.9518			8.484	0.235948	23.5948			95	0.240389	24.0389
	10.132	0.369484	36.9484		241.2	0.369829	36.9829			8.484	0.236147	23.6147			95.1	0.240591	24.0591
	10.132	0.369795	36.9795		241.7	0.37014	37.014			8.484	0.236346	23.6346			95.1	0.240793	24.0793
	10.132	0.370106	37.0106		241.8	0.370451	37.0451			8.484	0.236544	23.6544			95.2	0.240996	24.0996
	10.132	0.370416	37.0416		242.2	0.370762	37.0762			8.484	0.236743	23.6743			95.4	0.241198	24.1198
	10.132	0.370727	37.0727		242.4	0.371073	37.1073			8.484	0.236941	23.6941			95.6	0.2414	24.14
	10.132	0.371038	37.1038		243	0.371384	37.1384			8.484	0.23714	23.714			95.7	0.241603	24.1603
	10.132	0.371349	37.1349		243.1	0.371695	37.1695			8.484	0.237339	23.7339			95.8	0.241805	24.1805
	10.132	0.371659	37.1659		243.4	0.372006	37.2006			8.484	0.237537	23.7537			95.8	0.242007	24.2007
	10.132	0.37197	37.197		243.8	0.372317	37.2317			8.484	0.237736	23.7736			95.8	0.24221	24.221
	10.132	0.372281	37.2281		243.9	0.372628	37.2628			8.484	0.237934	23.7934			95.9	0.242412	24.2412
	10.132	0.372592	37.2592		244.2	0.372939	37.2939			8.484	0.238133	23.8133			95.9	0.242614	24.2614
	10.132	0.372902	37.2902		244.7	0.37325	37.325			8.484	0.238332	23.8332			96	0.242817	24.2817
	10.132	0.373213	37.3213		244.8	0.373561	37.3561			8.484	0.23853	23.853			96.1	0.243019	24.3019
	10.132	0.373524	37.3524		245	0.373872	37.3872			8.484	0.238729	23.8729			96.2	0.243221	24.3221
	10.132	0.373835	37.3835		245.3	0.374184	37.4184			8.484	0.238928	23.8928			96.3	0.243424	24.3424
	10.132	0.374145	37.4145		245.8	0.374495	37.4495			8.484	0.239126	23.9126			96.5	0.243626	24.3626
	10.193	0.374456	37.4456		246.1	0.374806	37.4806			8.484	0.239325	23.9325			96.5	0.243828	24.3828
	10.193	0.374767	37.4767		246.3	0.375117	37.5117			8.484	0.239523	23.9523			96.5	0.244031	24.4031
	10.193	0.375078	37.5078		246.5	0.375428	37.5428			8.484	0.239722	23.9722			96.6	0.244233	24.4233
	10.193	0.375388	37.5388		246.6	0.375739	37.5739			8.484	0.239921	23.9921			96.7	0.244435	24.4435
	10.193	0.375699	37.5699		247.1	0.37605	37.605			8.484	0.240119	24.0119			96.7	0.244638	24.4638
	10.193	0.37601	37.601		247.4	0.376361	37.6361			8.484	0.240318	24.0318			96.8	0.24484	24.484
	10.193	0.376321	37.6321		247.4	0.376672	37.6672			8.484	0.240516	24.0516			96.9	0.245042	24.5042
	10.193	0.376631	37.6631		247.8	0.376983	37.6983			8.484	0.240715	24.0715			97	0.245245	24.5245
	10.193	0.376942	37.6942		247.9	0.377294	37.7294			8.484	0.240914	24.0914			97.3	0.245447	24.5447
	10.193	0.377253	37.7253		248.2	0.377605	37.7605			8.484	0.241112	24.1112			97.3	0.24565	24.565
	10.193	0.377564	37.7564		248.5	0.377916	37.7916			8.484	0.241311	24.1311			97.3	0.245852	24.5852
	10.193	0.377874	37.7874		248.7	0.378227	37.8227			8.484	0.241509	24.1509			97.4	0.246054	24.6054
	10.193	0.378185	37.8185		248.8	0.378538	37.8538			8.484	0.241708	24.1708			97.5	0.246257	24.6257
	10.193	0.378496	37.8496		248.8	0.378849	37.8849			8.484	0.241907	24.1907			97.5	0.246459	24.6459
	10.193	0.378807	37.8807		249	0.37916	37.916			8.484	0.242105	24.2105			97.7	0.246661	24.6661
	10.254	0.379117	37.9117		249.1	0.379471	37.9471			8.484	0.242304	24.2304			97.7	0.246864	24.6864
	10.254	0.379428	37.9428		250.7	0.379782	37.9782			8.484	0.242502	24.2502			97.7	0.247066	24.7066
	10.254	0.379739	37.9739		250.8	0.380093	38.0093			8.484	0.242701	24.2701			97.8	0.247268	24.7268
	10.254	0.38005	38.005		250.8	0.380404	38.0404			8.484	0.2429	24.29			97.8	0.247471	24.7471
	10.254	0.38036	38.036		251.1	0.380715	38.0715			8.545	0.243098	24.3098			97.9	0.247673	24.7673
	10.254	0.380671	38.0671		251.1	0.381026	38.1026			8.545	0.243297	24.3297			98	0.247875	24.7875
	10.254	0.380982	38.0982		251.2	0.381337	38.1337			8.545	0.243496	24.3496			98.1	0.248078	24.8078
	10.254	0.381293	38.1293		251.6	0.381649	38.1649			8.545	0.243694	24.3694			98.2	0.24828	24.828
	10.254	0.381603	38.1603		251.6	0.38196	38.196			8.545	0.243893	24.3893			98.3	0.248482	24.8482
	10.254	0.381914	38.1914		251.6	0.382271	38.2271			8.545	0.244091	24.4091			98.3	0.248685	24.8685
	10.254	0.382225	38.2225		252.3	0.382582	38.2582			8.545	0.24429	24.429			98.4	0.248887	24.8887
	10.254	0.382536	38.2536		252.5	0.382893	38.2893			8.545	0.244489	24.4489			98.4	0.249089	24.9089
	10.254	0.382846	38.2846		252.9	0.383204	38.3204			8.545	0.244687	24.4687			98.5	0.249292	24.9292
	10.254	0.383157	38.3157		253.3	0.383515	38.3515			8.545	0.244886	24.4886			98.7	0.249494	24.9494
	10.254	0.383468	38.3468		253.4	0.383826	38.3826			8.545	0.245084	24.5084			98.8	0.249696	24.9696
	10.254	0.383779	38.3779		253.5	0.384137	38.4137			8.545	0.245283	24.5283			98.8	0.249899	24.9899
	10.254	0.384089	38.4089		253.5	0.384448	38.4448			8.545	0.245482	24.5482			98.8	0.250101	25.0101
	10.254	0.3844	38.44		253.5	0.384759	38.4759			8.545	0.24568	24.568			98.8	0.250304	25.0304
	10.254	0.384711	38.4711		253.7	0.38507	38.507			8.545	0.245879	24.5879			99	0.250506	25.0506
	10.254	0.385022	38.5022		253.8	0.385381	38.5381			8.545	0.246077	24.6077			99	0.250708	25.0708
	10.254	0.385333	38.5333		254.1	0.385692	38.5692			8.545	0.246276	24.6276			99	0.250911	25.0911
	10.315	0.385643	38.5643		254.3	0.386003	38.6003			8.545	0.246475	24.6475			99	0.251113	25.1113
	10.315	0.385954	38.5954		254.5	0.386314	38.6314			8.606	0.246673	24.6673			99	0.251315	25.1315
	10.315	0.386265	38.6265		254.7	0.386625	38.6625			8.606	0.246872	24.6872			99.1	0.251518	25.1518
	10.315	0.386576	38.6576		255.2	0.386936	38.6936			8.606	0.247071	24.7071			99.2	0.25172	25.172
	10.315	0.386886	38.6886		255.3	0.387247	38.7247			8.606	0.247269	24.7269			99.2	0.251922	25.1922
	10.315	0.387197	38.7197		255.3	0.387558	38.7558			8.606	0.247468	24.7468			99.3	0.252125	25.2125
	10.315	0.387508	38.7508		255.5	0.387869	38.7869			8.606	0.247666	24.7666			99.3	0.252327	25.2327
	10.315	0.387819	38.7819		255.6	0.38818	38.818			8.606	0.247865	24.7865			99.4	0.252529	25.2529
	10.315	0.388129	38.8129		255.6	0.388491	38.8491			8.606	0.248064	24.8064			99.5	0.252732	25.2732
	10.315	0.38844	38.844		256.4	0.388802	38.8802			8.606	0.248262	24.8262			99.7	0.252934	25.2934
	10.315	0.388751	38.8751		256.8	0.389114	38.9114			8.606	0.248461	24.8461			99.7	0.253136	25.3136
	10.315	0.389062	38.9062		257.4	0.389425	38.9425			8.606	0.248659	24.8659			99.7	0.253339	25.3339
	10.315	0.389372	38.9372		257.9	0.389736	38.9736			8.606	0.248858	24.8858			99.7	0.253541	25.3541
	10.315	0.389683	38.9683		258.3	0.390047	39.0047			8.606	0.249057	24.9057			99.8	0.253743	25.3743
	10.315	0.389994	38.9994		258.3	0.390358	39.0358			8.606	0.249255	24.9255			99.8	0.253946	25.3946
	10.315	0.390305	39.0305		258.6	0.390669	39.0669			8.606	0.249454	24.9454			100	0.254148	25.4148
	10.315	0.390615	39.0615		259.3	0.39098	39.098			8.606	0.249652	24.9652			100	0.25435	25.435
	10.315	0.390926	39.0926		259.6	0.391291	39.1291			8.606	0.249851	24.9851			100	0.254553	25.4553
	10.376	0.391237	39.1237		259.8	0.391602	39.1602			8.606	0.25005	25.005			100.1	0.254755	25.4755
	10.376	0.391548	39.1548		259.9	0.391913	39.1913			8.606	0.250248	25.0248			100.2	0.254958	25.4958
	10.376	0.391858	39.1858		260	0.392224	39.2224			8.606	0.250447	25.0447			100.4	0.25516	25.516
	10.376	0.392169	39.2169		260.3	0.392535	39.2535			8.606	0.250645	25.0645			100.4	0.255362	25.5362
	10.376	0.39248	39.248		260.5	0.392846	39.2846			8.606	0.250844	25.0844			100.4	0.255565	25.5565
	10.376	0.392791	39.2791		260.7	0.393157	39.3157			8.606	0.251043	25.1043			100.5	0.255767	25.5767
	10.376	0.393101	39.3101		260.9	0.393468	39.3468			8.606	0.251241	25.1241			100.5	0.255969	25.5969
	10.376	0.393412	39.3412		260.9	0.393779	39.3779			8.606	0.25144	25.144			100.6	0.256172	25.6172
	10.376	0.393723	39.3723		261.1	0.39409	39.409			8.606	0.251639	25.1639			100.8	0.256374	25.6374
	10.376	0.394034	39.4034		261.3	0.394401	39.4401			8.606	0.251837	25.1837			100.8	0.256576	25.6576
	10.376	0.394344	39.4344		261.6	0.394712	39.4712			8.606	0.252036	25.2036			100.9	0.256779	25.6779
	10.376	0.394655	39.4655		261.9	0.395023	39.5023			8.606	0.252234	25.2234			101.1	0.256981	25.6981
	10.376	0.394966	39.4966		262.7	0.395334	39.5334			8.606	0.252433	25.2433			101.1	0.257183	25.7183
	10.376	0.395277	39.5277		262.9	0.395645	39.5645			8.606	0.252632	25.2632			101.3	0.257386	25.7386
	10.376	0.395587	39.5587		263.6	0.395956	39.5956			8.667	0.25283	25.283			101.3	0.257588	25.7588
	10.376	0.395898	39.5898		264	0.396267	39.6267			8.667	0.253029	25.3029			101.4	0.25779	25.779
	10.376	0.396209	39.6209		264.1	0.396579	39.6579			8.667	0.253227	25.3227			101.4	0.257993	25.7993
	10.376	0.39652	39.652		264.4	0.39689	39.689			8.667	0.253426	25.3426			101.5	0.258195	25.8195
	10.437	0.39683	39.683		264.5	0.397201	39.7201			8.667	0.253625	25.3625			101.5	0.258397	25.8397
	10.437	0.397141	39.7141		264.6	0.397512	39.7512			8.667	0.253823	25.3823			101.5	0.2586	25.86
	10.437	0.397452	39.7452		265.2	0.397823	39.7823			8.667	0.254022	25.4022			101.6	0.258802	25.8802
	10.437	0.397763	39.7763		265.3	0.398134	39.8134			8.667	0.25422	25.422			101.6	0.259004	25.9004
	10.437	0.398073	39.8073		265.5	0.398445	39.8445			8.667	0.254419	25.4419			101.7	0.259207	25.9207
	10.437	0.398384	39.8384		265.6	0.398756	39.8756			8.667	0.254618	25.4618			101.7	0.259409	25.9409
	10.437	0.398695	39.8695		265.6	0.399067	39.9067			8.667	0.254816	25.4816			101.8	0.259611	25.9611
	10.437	0.399006	39.9006		265.6	0.399378	39.9378			8.667	0.255015	25.5015			101.9	0.259814	25.9814
	10.437	0.399316	39.9316		265.7	0.399689	39.9689			8.667	0.255214	25.5214			101.9	0.260016	26.0016
	10.437	0.399627	39.9627		266.5	0.4	40			8.667	0.255412	25.5412			102	0.260219	26.0219
	10.437	0.399938	39.9938		267.3	0.400311	40.0311			8.667	0.255611	25.5611			102	0.260421	26.0421
	10.437	0.400249	40.0249		267.3	0.400622	40.0622			8.667	0.255809	25.5809			102	0.260623	26.0623
	10.437	0.400559	40.0559		267.3	0.400933	40.0933			8.667	0.256008	25.6008			102.1	0.260826	26.0826
	10.437	0.40087	40.087		267.4	0.401244	40.1244			8.667	0.256207	25.6207			102.2	0.261028	26.1028
	10.437	0.401181	40.1181		267.8	0.401555	40.1555			8.667	0.256405	25.6405			102.3	0.26123	26.123
	10.437	0.401492	40.1492		267.8	0.401866	40.1866			8.667	0.256604	25.6604			102.5	0.261433	26.1433
	10.498	0.401802	40.1802		268.3	0.402177	40.2177			8.667	0.256802	25.6802			102.5	0.261635	26.1635
	10.498	0.402113	40.2113		268.3	0.402488	40.2488			8.667	0.257001	25.7001			102.6	0.261837	26.1837
	10.498	0.402424	40.2424		268.7	0.402799	40.2799			8.667	0.2572	25.72			102.6	0.26204	26.204
	10.498	0.402735	40.2735		268.8	0.40311	40.311			8.667	0.257398	25.7398			102.6	0.262242	26.2242
	10.498	0.403045	40.3045		269	0.403421	40.3421			8.667	0.257597	25.7597			102.7	0.262444	26.2444
	10.498	0.403356	40.3356		269.1	0.403733	40.3733			8.667	0.257795	25.7795			102.9	0.262647	26.2647
	10.498	0.403667	40.3667		269.5	0.404044	40.4044			8.667	0.257994	25.7994			103	0.262849	26.2849
	10.498	0.403978	40.3978		269.6	0.404355	40.4355			8.667	0.258193	25.8193			103	0.263051	26.3051
	10.498	0.404288	40.4288		269.9	0.404666	40.4666			8.667	0.258391	25.8391			103.1	0.263254	26.3254
	10.498	0.404599	40.4599		270.2	0.404977	40.4977			8.667	0.25859	25.859			103.3	0.263456	26.3456
	10.498	0.40491	40.491		270.5	0.405288	40.5288			8.667	0.258788	25.8788			103.3	0.263658	26.3658
	10.498	0.405221	40.5221		270.6	0.405599	40.5599			8.667	0.258987	25.8987			103.4	0.263861	26.3861
	10.498	0.405531	40.5531		270.9	0.40591	40.591			8.667	0.259186	25.9186			103.5	0.264063	26.4063
	10.498	0.405842	40.5842		271	0.406221	40.6221			8.667	0.259384	25.9384			103.5	0.264265	26.4265
	10.498	0.406153	40.6153		271.2	0.406532	40.6532			8.667	0.259583	25.9583			103.5	0.264468	26.4468
	10.559	0.406464	40.6464		271.4	0.406843	40.6843			8.667	0.259782	25.9782			103.6	0.26467	26.467
	10.559	0.406774	40.6774		271.5	0.407154	40.7154			8.667	0.25998	25.998			103.6	0.264873	26.4873
	10.559	0.407085	40.7085		271.6	0.407465	40.7465			8.667	0.260179	26.0179			103.6	0.265075	26.5075
	10.559	0.407396	40.7396		272	0.407776	40.7776			8.667	0.260377	26.0377			103.7	0.265277	26.5277
	10.559	0.407707	40.7707		272.8	0.408087	40.8087			8.667	0.260576	26.0576			103.9	0.26548	26.548
	10.559	0.408017	40.8017		273.3	0.408398	40.8398			8.667	0.260775	26.0775			104.1	0.265682	26.5682
	10.559	0.408328	40.8328		273.7	0.408709	40.8709			8.667	0.260973	26.0973			104.2	0.265884	26.5884
	10.559	0.408639	40.8639		274.1	0.40902	40.902			8.667	0.261172	26.1172			104.2	0.266087	26.6087
	10.559	0.40895	40.895		274.1	0.409331	40.9331			8.728	0.26137	26.137			104.2	0.266289	26.6289
	10.559	0.40926	40.926		274.6	0.409642	40.9642			8.728	0.261569	26.1569			104.5	0.266491	26.6491
	10.559	0.409571	40.9571		274.6	0.409953	40.9953			8.728	0.261768	26.1768			104.5	0.266694	26.6694
	10.559	0.409882	40.9882		274.7	0.410264	41.0264			8.728	0.261966	26.1966			104.7	0.266896	26.6896
	10.559	0.410193	41.0193		275.7	0.410575	41.0575			8.728	0.262165	26.2165			104.9	0.267098	26.7098
	10.559	0.410503	41.0503		275.7	0.410886	41.0886			8.728	0.262363	26.2363			105	0.267301	26.7301
	10.559	0.410814	41.0814		275.9	0.411198	41.1198			8.728	0.262562	26.2562			105	0.267503	26.7503
	10.559	0.411125	41.1125		276	0.411509	41.1509			8.728	0.262761	26.2761			105.2	0.267705	26.7705
	10.559	0.411436	41.1436		276	0.41182	41.182			8.728	0.262959	26.2959			105.3	0.267908	26.7908
	10.559	0.411746	41.1746		276.3	0.412131	41.2131			8.728	0.263158	26.3158			105.3	0.26811	26.811
	10.559	0.412057	41.2057		276.3	0.412442	41.2442			8.728	0.263357	26.3357			105.4	0.268312	26.8312
	10.559	0.412368	41.2368		276.3	0.412753	41.2753			8.728	0.263555	26.3555			105.5	0.268515	26.8515
	10.559	0.412679	41.2679		276.8	0.413064	41.3064			8.728	0.263754	26.3754			105.5	0.268717	26.8717
	10.559	0.412989	41.2989		277.3	0.413375	41.3375			8.728	0.263952	26.3952			105.7	0.268919	26.8919
	10.559	0.4133	41.33		278.3	0.413686	41.3686			8.728	0.264151	26.4151			105.8	0.269122	26.9122
	10.559	0.413611	41.3611		278.8	0.413997	41.3997			8.728	0.26435	26.435			105.8	0.269324	26.9324
	10.62	0.413922	41.3922		279.5	0.414308	41.4308			8.728	0.264548	26.4548			106	0.269527	26.9527
	10.62	0.414232	41.4232		279.8	0.414619	41.4619			8.728	0.264747	26.4747			106	0.269729	26.9729
	10.62	0.414543	41.4543		279.8	0.41493	41.493			8.728	0.264945	26.4945			106.1	0.269931	26.9931
	10.62	0.414854	41.4854		280.4	0.415241	41.5241			8.728	0.265144	26.5144			106.3	0.270134	27.0134
	10.62	0.415165	41.5165		281.4	0.415552	41.5552			8.728	0.265343	26.5343			106.5	0.270336	27.0336
	10.62	0.415475	41.5475		281.9	0.415863	41.5863			8.728	0.265541	26.5541			106.8	0.270538	27.0538
	10.62	0.415786	41.5786		282.2	0.416174	41.6174			8.728	0.26574	26.574			106.8	0.270741	27.0741
	10.62	0.416097	41.6097		282.2	0.416485	41.6485			8.728	0.265938	26.5938			107	0.270943	27.0943
	10.62	0.416408	41.6408		282.3	0.416796	41.6796			8.728	0.266137	26.6137			107	0.271145	27.1145
	10.62	0.416718	41.6718		282.3	0.417107	41.7107			8.728	0.266336	26.6336			107.1	0.271348	27.1348
	10.62	0.417029	41.7029		282.3	0.417418	41.7418			8.728	0.266534	26.6534			107.3	0.27155	27.155
	10.62	0.41734	41.734		282.4	0.417729	41.7729			8.728	0.266733	26.6733			107.4	0.271752	27.1752
	10.62	0.417651	41.7651		282.6	0.41804	41.804			8.789	0.266931	26.6931			107.5	0.271955	27.1955
	10.62	0.417961	41.7961		282.6	0.418351	41.8351			8.789	0.26713	26.713			107.5	0.272157	27.2157
	10.62	0.418272	41.8272		282.8	0.418663	41.8663			8.789	0.267329	26.7329			107.6	0.272359	27.2359
	10.62	0.418583	41.8583		283	0.418974	41.8974			8.789	0.267527	26.7527			107.7	0.272562	27.2562
	10.62	0.418894	41.8894		283	0.419285	41.9285			8.789	0.267726	26.7726			107.8	0.272764	27.2764
	10.62	0.419204	41.9204		283.4	0.419596	41.9596			8.789	0.267925	26.7925			107.8	0.272966	27.2966
	10.62	0.419515	41.9515		283.7	0.419907	41.9907			8.789	0.268123	26.8123			107.8	0.273169	27.3169
	10.62	0.419826	41.9826		283.9	0.420218	42.0218			8.789	0.268322	26.8322			107.9	0.273371	27.3371
	10.62	0.420137	42.0137		284.5	0.420529	42.0529			8.789	0.26852	26.852			107.9	0.273573	27.3573
	10.62	0.420447	42.0447		284.9	0.42084	42.084			8.789	0.268719	26.8719			108	0.273776	27.3776
	10.62	0.420758	42.0758		284.9	0.421151	42.1151			8.789	0.268918	26.8918			108	0.273978	27.3978
	10.62	0.421069	42.1069		285.3	0.421462	42.1462			8.789	0.269116	26.9116			108.3	0.27418	27.418
	10.681	0.42138	42.138		285.7	0.421773	42.1773			8.789	0.269315	26.9315			108.4	0.274383	27.4383
	10.681	0.42169	42.169		286.1	0.422084	42.2084			8.789	0.269513	26.9513			108.4	0.274585	27.4585
	10.681	0.422001	42.2001		286.6	0.422395	42.2395			8.789	0.269712	26.9712			108.5	0.274788	27.4788
	10.681	0.422312	42.2312		286.7	0.422706	42.2706			8.789	0.269911	26.9911			108.7	0.27499	27.499
	10.681	0.422623	42.2623		286.8	0.423017	42.3017			8.789	0.270109	27.0109			108.8	0.275192	27.5192
	10.681	0.422933	42.2933		287.3	0.423328	42.3328			8.789	0.270308	27.0308			108.8	0.275395	27.5395
	10.681	0.423244	42.3244		287.4	0.423639	42.3639			8.789	0.270506	27.0506			108.8	0.275597	27.5597
	10.681	0.423555	42.3555		287.4	0.42395	42.395			8.789	0.270705	27.0705			108.9	0.275799	27.5799
	10.681	0.423866	42.3866		287.4	0.424261	42.4261			8.789	0.270904	27.0904			108.9	0.276002	27.6002
	10.681	0.424177	42.4177		287.5	0.424572	42.4572			8.789	0.271102	27.1102			108.9	0.276204	27.6204
	10.681	0.424487	42.4487		287.7	0.424883	42.4883			8.789	0.271301	27.1301			109.1	0.276406	27.6406
	10.681	0.424798	42.4798		288	0.425194	42.5194			8.789	0.2715	27.15			109.2	0.276609	27.6609
	10.742	0.425109	42.5109		288.1	0.425505	42.5505			8.789	0.271698	27.1698			109.2	0.276811	27.6811
	10.742	0.42542	42.542		288.8	0.425816	42.5816			8.789	0.271897	27.1897			109.5	0.277013	27.7013
	10.742	0.42573	42.573		288.8	0.426128	42.6128			8.789	0.272095	27.2095			109.5	0.277216	27.7216
	10.742	0.426041	42.6041		289	0.426439	42.6439			8.789	0.272294	27.2294			109.5	0.277418	27.7418
	10.742	0.426352	42.6352		289.2	0.42675	42.675			8.789	0.272493	27.2493			109.6	0.27762	27.762
	10.742	0.426663	42.6663		289.6	0.427061	42.7061			8.789	0.272691	27.2691			109.7	0.277823	27.7823
	10.742	0.426973	42.6973		289.8	0.427372	42.7372			8.789	0.27289	27.289			109.7	0.278025	27.8025
	10.742	0.427284	42.7284		290.1	0.427683	42.7683			8.789	0.273088	27.3088			109.8	0.278227	27.8227
	10.803	0.427595	42.7595		290.2	0.427994	42.7994			8.789	0.273287	27.3287			109.8	0.27843	27.843
	10.803	0.427906	42.7906		290.3	0.428305	42.8305			8.789	0.273486	27.3486			109.9	0.278632	27.8632
	10.803	0.428216	42.8216		290.7	0.428616	42.8616			8.789	0.273684	27.3684			110	0.278834	27.8834
	10.803	0.428527	42.8527		290.8	0.428927	42.8927			8.789	0.273883	27.3883			110	0.279037	27.9037
	10.803	0.428838	42.8838		291	0.429238	42.9238			8.789	0.274081	27.4081			110	0.279239	27.9239
	10.803	0.429149	42.9149		291	0.429549	42.9549			8.789	0.27428	27.428			110.2	0.279442	27.9442
	10.803	0.429459	42.9459		291.3	0.42986	42.986			8.789	0.274479	27.4479			110.3	0.279644	27.9644
	10.803	0.42977	42.977		291.4	0.430171	43.0171			8.85	0.274677	27.4677			110.6	0.279846	27.9846
	10.803	0.430081	43.0081		291.6	0.430482	43.0482			8.85	0.274876	27.4876			110.8	0.280049	28.0049
	10.803	0.430392	43.0392		291.9	0.430793	43.0793			8.85	0.275074	27.5074			110.9	0.280251	28.0251
	10.864	0.430702	43.0702		292.4	0.431104	43.1104			8.85	0.275273	27.5273			110.9	0.280453	28.0453
	10.864	0.431013	43.1013		292.5	0.431415	43.1415			8.85	0.275472	27.5472			111.1	0.280656	28.0656
	10.864	0.431324	43.1324		292.6	0.431726	43.1726			8.85	0.27567	27.567			111.1	0.280858	28.0858
	10.864	0.431635	43.1635		293.5	0.432037	43.2037			8.85	0.275869	27.5869			111.1	0.28106	28.106
	10.864	0.431945	43.1945		293.6	0.432348	43.2348			8.85	0.276068	27.6068			111.3	0.281263	28.1263
	10.864	0.432256	43.2256		293.8	0.432659	43.2659			8.85	0.276266	27.6266			111.3	0.281465	28.1465
	10.864	0.432567	43.2567		293.9	0.43297	43.297			8.85	0.276465	27.6465			111.5	0.281667	28.1667
	10.864	0.432878	43.2878		294.2	0.433281	43.3281			8.85	0.276663	27.6663			111.5	0.28187	28.187
	10.864	0.433188	43.3188		294.5	0.433593	43.3593			8.85	0.276862	27.6862			111.6	0.282072	28.2072
	10.864	0.433499	43.3499		294.5	0.433904	43.3904			8.85	0.277061	27.7061			111.7	0.282274	28.2274
	10.864	0.43381	43.381		294.9	0.434215	43.4215			8.85	0.277259	27.7259			111.8	0.282477	28.2477
	10.864	0.434121	43.4121		295.2	0.434526	43.4526			8.85	0.277458	27.7458			111.8	0.282679	28.2679
	10.864	0.434431	43.4431		295.9	0.434837	43.4837			8.85	0.277656	27.7656			111.9	0.282881	28.2881
	10.864	0.434742	43.4742		296.3	0.435148	43.5148			8.85	0.277855	27.7855			111.9	0.283084	28.3084
	10.864	0.435053	43.5053		296.3	0.435459	43.5459			8.85	0.278054	27.8054			111.9	0.283286	28.3286
	10.864	0.435364	43.5364		297.2	0.43577	43.577			8.85	0.278252	27.8252			112	0.283488	28.3488
	10.864	0.435674	43.5674		297.4	0.436081	43.6081			8.85	0.278451	27.8451			112	0.283691	28.3691
	10.864	0.435985	43.5985		297.4	0.436392	43.6392			8.85	0.278649	27.8649			112	0.283893	28.3893
	10.925	0.436296	43.6296		297.5	0.436703	43.6703			8.85	0.278848	27.8848			112.2	0.284096	28.4096
	10.925	0.436607	43.6607		298.2	0.437014	43.7014			8.85	0.279047	27.9047			112.2	0.284298	28.4298
	10.925	0.436917	43.6917		298.8	0.437325	43.7325			8.85	0.279245	27.9245			112.2	0.2845	28.45
	10.925	0.437228	43.7228		298.9	0.437636	43.7636			8.85	0.279444	27.9444			112.2	0.284703	28.4703
	10.925	0.437539	43.7539		298.9	0.437947	43.7947			8.85	0.279643	27.9643			112.6	0.284905	28.4905
	10.925	0.43785	43.785		299.1	0.438258	43.8258			8.85	0.279841	27.9841			112.6	0.285107	28.5107
	10.925	0.43816	43.816		299.6	0.438569	43.8569			8.85	0.28004	28.004			112.6	0.28531	28.531
	10.925	0.438471	43.8471		299.8	0.43888	43.888			8.85	0.280238	28.0238			112.7	0.285512	28.5512
	10.925	0.438782	43.8782		299.8	0.439191	43.9191			8.85	0.280437	28.0437			112.7	0.285714	28.5714
	10.925	0.439093	43.9093		300	0.439502	43.9502			8.85	0.280636	28.0636			112.8	0.285917	28.5917
	10.925	0.439403	43.9403		300.1	0.439813	43.9813			8.85	0.280834	28.0834			112.8	0.286119	28.6119
	10.925	0.439714	43.9714		300.2	0.440124	44.0124			8.85	0.281033	28.1033			112.9	0.286321	28.6321
	10.925	0.440025	44.0025		300.6	0.440435	44.0435			8.85	0.281231	28.1231			113	0.286524	28.6524
	10.986	0.440336	44.0336		301.1	0.440747	44.0747			8.85	0.28143	28.143			113.1	0.286726	28.6726
	10.986	0.440646	44.0646		301.8	0.441058	44.1058			8.85	0.281629	28.1629			113.2	0.286928	28.6928
	10.986	0.440957	44.0957		303.6	0.441369	44.1369			8.85	0.281827	28.1827			113.2	0.287131	28.7131
	10.986	0.441268	44.1268		304	0.44168	44.168			8.85	0.282026	28.2026			113.2	0.287333	28.7333
	10.986	0.441579	44.1579		304.4	0.441991	44.1991			8.85	0.282224	28.2224			113.3	0.287535	28.7535
	10.986	0.441889	44.1889		304.6	0.442302	44.2302			8.85	0.282423	28.2423			113.3	0.287738	28.7738
	10.986	0.4422	44.22		305	0.442613	44.2613			8.85	0.282622	28.2622			113.6	0.28794	28.794
	10.986	0.442511	44.2511		305.3	0.442924	44.2924			8.911	0.28282	28.282			113.6	0.288142	28.8142
	10.986	0.442822	44.2822		306.2	0.443235	44.3235			8.911	0.283019	28.3019			113.7	0.288345	28.8345
	10.986	0.443132	44.3132		306.3	0.443546	44.3546			8.911	0.283217	28.3217			113.8	0.288547	28.8547
	10.986	0.443443	44.3443		306.3	0.443857	44.3857			8.911	0.283416	28.3416			113.8	0.288749	28.8749
	10.986	0.443754	44.3754		306.7	0.444168	44.4168			8.911	0.283615	28.3615			113.9	0.288952	28.8952
	10.986	0.444065	44.4065		306.8	0.444479	44.4479			8.911	0.283813	28.3813			113.9	0.289154	28.9154
	10.986	0.444375	44.4375		307.2	0.44479	44.479			8.911	0.284012	28.4012			114	0.289357	28.9357
	10.986	0.444686	44.4686		307.6	0.445101	44.5101			8.911	0.284211	28.4211			114.1	0.289559	28.9559
	10.986	0.444997	44.4997		308	0.445412	44.5412			8.911	0.284409	28.4409			114.2	0.289761	28.9761
	10.986	0.445308	44.5308		308.1	0.445723	44.5723			8.911	0.284608	28.4608			114.3	0.289964	28.9964
	10.986	0.445618	44.5618		308.3	0.446034	44.6034			8.911	0.284806	28.4806			114.4	0.290166	29.0166
	10.986	0.445929	44.5929		308.8	0.446345	44.6345			8.911	0.285005	28.5005			114.4	0.290368	29.0368
	10.986	0.44624	44.624		309.5	0.446656	44.6656			8.911	0.285204	28.5204			114.5	0.290571	29.0571
	10.986	0.446551	44.6551		309.6	0.446967	44.6967			8.911	0.285402	28.5402			114.5	0.290773	29.0773
	10.986	0.446861	44.6861		310	0.447278	44.7278			8.911	0.285601	28.5601			114.7	0.290975	29.0975
	10.986	0.447172	44.7172		310	0.447589	44.7589			8.911	0.285799	28.5799			114.8	0.291178	29.1178
	10.986	0.447483	44.7483		310.5	0.4479	44.79			8.911	0.285998	28.5998			114.8	0.29138	29.138
	10.986	0.447794	44.7794		310.9	0.448212	44.8212			8.911	0.286197	28.6197			114.9	0.291582	29.1582
	10.986	0.448104	44.8104		311.7	0.448523	44.8523			8.911	0.286395	28.6395			115.1	0.291785	29.1785
	10.986	0.448415	44.8415		311.8	0.448834	44.8834			8.911	0.286594	28.6594			115.2	0.291987	29.1987
	10.986	0.448726	44.8726		311.8	0.449145	44.9145			8.911	0.286792	28.6792			115.2	0.292189	29.2189
	11.047	0.449037	44.9037		312.3	0.449456	44.9456			8.911	0.286991	28.6991			115.5	0.292392	29.2392
	11.047	0.449347	44.9347		312.3	0.449767	44.9767			8.911	0.28719	28.719			115.5	0.292594	29.2594
	11.047	0.449658	44.9658		312.4	0.450078	45.0078			8.911	0.287388	28.7388			115.6	0.292796	29.2796
	11.047	0.449969	44.9969		313	0.450389	45.0389			8.911	0.287587	28.7587			115.7	0.292999	29.2999
	11.047	0.45028	45.028		313.3	0.4507	45.07			8.911	0.287786	28.7786			115.8	0.293201	29.3201
	11.047	0.45059	45.059		313.4	0.451011	45.1011			8.972	0.287984	28.7984			115.9	0.293403	29.3403
	11.047	0.450901	45.0901		313.7	0.451322	45.1322			8.972	0.288183	28.8183			116	0.293606	29.3606
	11.047	0.451212	45.1212		314	0.451633	45.1633			8.972	0.288381	28.8381			116.1	0.293808	29.3808
	11.047	0.451523	45.1523		314.9	0.451944	45.1944			8.972	0.28858	28.858			116.2	0.294011	29.4011
	11.047	0.451833	45.1833		315.3	0.452255	45.2255			8.972	0.288779	28.8779			116.3	0.294213	29.4213
	11.047	0.452144	45.2144		315.6	0.452566	45.2566			8.972	0.288977	28.8977			116.3	0.294415	29.4415
	11.047	0.452455	45.2455		316.1	0.452877	45.2877			8.972	0.289176	28.9176			116.3	0.294618	29.4618
	11.047	0.452766	45.2766		316.6	0.453188	45.3188			8.972	0.289374	28.9374			116.4	0.29482	29.482
	11.047	0.453076	45.3076		316.8	0.453499	45.3499			8.972	0.289573	28.9573			116.5	0.295022	29.5022
	11.047	0.453387	45.3387		317	0.45381	45.381			8.972	0.289772	28.9772			116.7	0.295225	29.5225
	11.047	0.453698	45.3698		317.1	0.454121	45.4121			8.972	0.28997	28.997			116.8	0.295427	29.5427
	11.047	0.454009	45.4009		317.2	0.454432	45.4432			8.972	0.290169	29.0169			116.8	0.295629	29.5629
	11.047	0.454319	45.4319		317.3	0.454743	45.4743			8.972	0.290367	29.0367			117	0.295832	29.5832
	11.108	0.45463	45.463		317.5	0.455054	45.5054			8.972	0.290566	29.0566			117.2	0.296034	29.6034
	11.108	0.454941	45.4941		317.9	0.455365	45.5365			8.972	0.290765	29.0765			117.3	0.296236	29.6236
	11.108	0.455252	45.5252		318.1	0.455677	45.5677			8.972	0.290963	29.0963			117.4	0.296439	29.6439
	11.108	0.455562	45.5562		318.1	0.455988	45.5988			8.972	0.291162	29.1162			117.7	0.296641	29.6641
	11.108	0.455873	45.5873		318.1	0.456299	45.6299			8.972	0.29136	29.136			117.7	0.296843	29.6843
	11.108	0.456184	45.6184		318.5	0.45661	45.661			8.972	0.291559	29.1559			117.8	0.297046	29.7046
	11.108	0.456495	45.6495		319	0.456921	45.6921			8.972	0.291758	29.1758			117.8	0.297248	29.7248
	11.108	0.456805	45.6805		319.4	0.457232	45.7232			8.972	0.291956	29.1956			118	0.29745	29.745
	11.108	0.457116	45.7116		319.5	0.457543	45.7543			8.972	0.292155	29.2155			118	0.297653	29.7653
	11.108	0.457427	45.7427		319.8	0.457854	45.7854			8.972	0.292354	29.2354			118	0.297855	29.7855
	11.108	0.457738	45.7738		319.8	0.458165	45.8165			8.972	0.292552	29.2552			118.2	0.298057	29.8057
	11.108	0.458048	45.8048		320.7	0.458476	45.8476			8.972	0.292751	29.2751			118.4	0.29826	29.826
	11.108	0.458359	45.8359		320.9	0.458787	45.8787			8.972	0.292949	29.2949			118.4	0.298462	29.8462
	11.108	0.45867	45.867		321.3	0.459098	45.9098			8.972	0.293148	29.3148			118.5	0.298665	29.8665
	11.108	0.458981	45.8981		321.4	0.459409	45.9409			8.972	0.293347	29.3347			118.7	0.298867	29.8867
	11.108	0.459291	45.9291		322.8	0.45972	45.972			8.972	0.293545	29.3545			118.9	0.299069	29.9069
	11.108	0.459602	45.9602		322.9	0.460031	46.0031			8.972	0.293744	29.3744			118.9	0.299272	29.9272
	11.108	0.459913	45.9913		323.8	0.460342	46.0342			8.972	0.293942	29.3942			119	0.299474	29.9474
	11.108	0.460224	46.0224		324	0.460653	46.0653			8.972	0.294141	29.4141			119.1	0.299676	29.9676
	11.108	0.460534	46.0534		324.1	0.460964	46.0964			8.972	0.29434	29.434			119.1	0.299879	29.9879
	11.108	0.460845	46.0845		324.3	0.461275	46.1275			8.972	0.294538	29.4538			119.2	0.300081	30.0081
	11.169	0.461156	46.1156		324.4	0.461586	46.1586			8.972	0.294737	29.4737			119.2	0.300283	30.0283
	11.169	0.461467	46.1467		324.8	0.461897	46.1897			9.033	0.294935	29.4935			119.3	0.300486	30.0486
	11.169	0.461778	46.1778		325.8	0.462208	46.2208			9.033	0.295134	29.5134			119.3	0.300688	30.0688
	11.169	0.462088	46.2088		326	0.462519	46.2519			9.033	0.295333	29.5333			119.5	0.30089	30.089
	11.169	0.462399	46.2399		327	0.46283	46.283			9.033	0.295531	29.5531			119.8	0.301093	30.1093
	11.169	0.46271	46.271		327	0.463142	46.3142			9.033	0.29573	29.573			119.9	0.301295	30.1295
	11.169	0.463021	46.3021		327.4	0.463453	46.3453			9.033	0.295929	29.5929			119.9	0.301497	30.1497
	11.169	0.463331	46.3331		327.4	0.463764	46.3764			9.033	0.296127	29.6127			120	0.3017	30.17
	11.169	0.463642	46.3642		327.6	0.464075	46.4075			9.033	0.296326	29.6326			120	0.301902	30.1902
	11.169	0.463953	46.3953		328	0.464386	46.4386			9.033	0.296524	29.6524			120.1	0.302104	30.2104
	11.169	0.464264	46.4264		328.2	0.464697	46.4697			9.033	0.296723	29.6723			120.1	0.302307	30.2307
	11.23	0.464574	46.4574		328.4	0.465008	46.5008			9.033	0.296922	29.6922			120.1	0.302509	30.2509
	11.23	0.464885	46.4885		328.4	0.465319	46.5319			9.033	0.29712	29.712			120.2	0.302711	30.2711
	11.23	0.465196	46.5196		328.4	0.46563	46.563			9.033	0.297319	29.7319			120.3	0.302914	30.2914
	11.23	0.465507	46.5507		328.9	0.465941	46.5941			9.033	0.297517	29.7517			120.3	0.303116	30.3116
	11.23	0.465817	46.5817		329	0.466252	46.6252			9.033	0.297716	29.7716			120.4	0.303318	30.3318
	11.23	0.466128	46.6128		329.2	0.466563	46.6563			9.033	0.297915	29.7915			120.4	0.303521	30.3521
	11.23	0.466439	46.6439		329.7	0.466874	46.6874			9.033	0.298113	29.8113			120.5	0.303723	30.3723
	11.23	0.46675	46.675		330.4	0.467185	46.7185			9.033	0.298312	29.8312			120.5	0.303926	30.3926
	11.23	0.46706	46.706		330.4	0.467496	46.7496			9.033	0.29851	29.851			120.6	0.304128	30.4128
	11.23	0.467371	46.7371		330.5	0.467807	46.7807			9.033	0.298709	29.8709			120.7	0.30433	30.433
	11.23	0.467682	46.7682		330.7	0.468118	46.8118			9.033	0.298908	29.8908			120.7	0.304533	30.4533
	11.23	0.467993	46.7993		331.4	0.468429	46.8429			9.033	0.299106	29.9106			120.8	0.304735	30.4735
	11.23	0.468303	46.8303		331.8	0.46874	46.874			9.033	0.299305	29.9305			120.9	0.304937	30.4937
	11.23	0.468614	46.8614		333	0.469051	46.9051			9.033	0.299503	29.9503			120.9	0.30514	30.514
	11.23	0.468925	46.8925		333.6	0.469362	46.9362			9.033	0.299702	29.9702			120.9	0.305342	30.5342
	11.23	0.469236	46.9236		333.6	0.469673	46.9673			9.033	0.299901	29.9901			120.9	0.305544	30.5544
	11.292	0.469546	46.9546		333.8	0.469984	46.9984			9.033	0.300099	30.0099			121	0.305747	30.5747
	11.292	0.469857	46.9857		334.7	0.470295	47.0295			9.033	0.300298	30.0298			121.1	0.305949	30.5949
	11.292	0.470168	47.0168		335.5	0.470607	47.0607			9.033	0.300497	30.0497			121.3	0.306151	30.6151
	11.292	0.470479	47.0479		335.5	0.470918	47.0918			9.033	0.300695	30.0695			121.3	0.306354	30.6354
	11.292	0.470789	47.0789		335.8	0.471229	47.1229			9.033	0.300894	30.0894			121.3	0.306556	30.6556
	11.292	0.4711	47.11		336.3	0.47154	47.154			9.033	0.301092	30.1092			121.4	0.306758	30.6758
	11.292	0.471411	47.1411		336.9	0.471851	47.1851			9.033	0.301291	30.1291			121.4	0.306961	30.6961
	11.292	0.471722	47.1722		337	0.472162	47.2162			9.033	0.30149	30.149			121.5	0.307163	30.7163
	11.292	0.472032	47.2032		337.2	0.472473	47.2473			9.094	0.301688	30.1688			121.5	0.307365	30.7365
	11.292	0.472343	47.2343		337.2	0.472784	47.2784			9.094	0.301887	30.1887			121.6	0.307568	30.7568
	11.292	0.472654	47.2654		337.3	0.473095	47.3095			9.094	0.302085	30.2085			121.7	0.30777	30.777
	11.292	0.472965	47.2965		337.7	0.473406	47.3406			9.094	0.302284	30.2284			122	0.307972	30.7972
	11.292	0.473275	47.3275		337.9	0.473717	47.3717			9.094	0.302483	30.2483			122.2	0.308175	30.8175
	11.292	0.473586	47.3586		338.1	0.474028	47.4028			9.094	0.302681	30.2681			122.3	0.308377	30.8377
	11.292	0.473897	47.3897		338.3	0.474339	47.4339			9.094	0.30288	30.288			122.4	0.30858	30.858
	11.292	0.474208	47.4208		338.4	0.47465	47.465			9.094	0.303078	30.3078			122.5	0.308782	30.8782
	11.292	0.474518	47.4518		339.1	0.474961	47.4961			9.094	0.303277	30.3277			122.5	0.308984	30.8984
	11.353	0.474829	47.4829		339.5	0.475272	47.5272			9.094	0.303476	30.3476			122.7	0.309187	30.9187
	11.353	0.47514	47.514		339.9	0.475583	47.5583			9.094	0.303674	30.3674			122.8	0.309389	30.9389
	11.353	0.475451	47.5451		340	0.475894	47.5894			9.094	0.303873	30.3873			123.1	0.309591	30.9591
	11.353	0.475761	47.5761		340.4	0.476205	47.6205			9.094	0.304071	30.4071			123.2	0.309794	30.9794
	11.353	0.476072	47.6072		340.7	0.476516	47.6516			9.094	0.30427	30.427			123.3	0.309996	30.9996
	11.353	0.476383	47.6383		340.7	0.476827	47.6827			9.094	0.304469	30.4469			123.4	0.310198	31.0198
	11.353	0.476694	47.6694		340.9	0.477138	47.7138			9.094	0.304667	30.4667			123.5	0.310401	31.0401
	11.353	0.477004	47.7004		341.4	0.477449	47.7449			9.094	0.304866	30.4866			123.5	0.310603	31.0603
	11.353	0.477315	47.7315		341.4	0.47776	47.776			9.094	0.305065	30.5065			123.6	0.310805	31.0805
	11.353	0.477626	47.7626		341.6	0.478072	47.8072			9.094	0.305263	30.5263			123.6	0.311008	31.1008
	11.353	0.477937	47.7937		341.8	0.478383	47.8383			9.094	0.305462	30.5462			123.7	0.31121	31.121
	11.353	0.478247	47.8247		341.8	0.478694	47.8694			9.094	0.30566	30.566			123.7	0.311412	31.1412
	11.353	0.478558	47.8558		342	0.479005	47.9005			9.094	0.305859	30.5859			123.9	0.311615	31.1615
	11.353	0.478869	47.8869		342	0.479316	47.9316			9.094	0.306058	30.6058			123.9	0.311817	31.1817
	11.353	0.47918	47.918		342	0.479627	47.9627			9.094	0.306256	30.6256			124	0.312019	31.2019
	11.353	0.47949	47.949		342.2	0.479938	47.9938			9.094	0.306455	30.6455			124	0.312222	31.2222
	11.414	0.479801	47.9801		342.7	0.480249	48.0249			9.094	0.306653	30.6653			124.3	0.312424	31.2424
	11.414	0.480112	48.0112		343.7	0.48056	48.056			9.094	0.306852	30.6852			124.5	0.312626	31.2626
	11.414	0.480423	48.0423		344.2	0.480871	48.0871			9.094	0.307051	30.7051			124.5	0.312829	31.2829
	11.414	0.480733	48.0733		344.3	0.481182	48.1182			9.094	0.307249	30.7249			124.6	0.313031	31.3031
	11.414	0.481044	48.1044		344.6	0.481493	48.1493			9.155	0.307448	30.7448			124.6	0.313234	31.3234
	11.414	0.481355	48.1355		344.6	0.481804	48.1804			9.155	0.307646	30.7646			124.7	0.313436	31.3436
	11.414	0.481666	48.1666		345	0.482115	48.2115			9.155	0.307845	30.7845			124.7	0.313638	31.3638
	11.414	0.481976	48.1976		345.3	0.482426	48.2426			9.155	0.308044	30.8044			124.8	0.313841	31.3841
	11.414	0.482287	48.2287		345.5	0.482737	48.2737			9.155	0.308242	30.8242			124.8	0.314043	31.4043
	11.414	0.482598	48.2598		345.5	0.483048	48.3048			9.155	0.308441	30.8441			125	0.314245	31.4245
	11.414	0.482909	48.2909		345.6	0.483359	48.3359			9.155	0.30864	30.864			125	0.314448	31.4448
	11.414	0.483219	48.3219		345.9	0.48367	48.367			9.155	0.308838	30.8838			125	0.31465	31.465
	11.414	0.48353	48.353		345.9	0.483981	48.3981			9.155	0.309037	30.9037			125.3	0.314852	31.4852
	11.414	0.483841	48.3841		346	0.484292	48.4292			9.155	0.309235	30.9235			125.3	0.315055	31.5055
	11.414	0.484152	48.4152		346.1	0.484603	48.4603			9.155	0.309434	30.9434			125.4	0.315257	31.5257
	11.475	0.484462	48.4462		346.9	0.484914	48.4914			9.155	0.309633	30.9633			125.6	0.315459	31.5459
	11.475	0.484773	48.4773		347.4	0.485226	48.5226			9.155	0.309831	30.9831			125.6	0.315662	31.5662
	11.475	0.485084	48.5084		347.5	0.485537	48.5537			9.155	0.31003	31.003			125.8	0.315864	31.5864
	11.475	0.485395	48.5395		347.6	0.485848	48.5848			9.155	0.310228	31.0228			125.9	0.316066	31.6066
	11.475	0.485705	48.5705		348.3	0.486159	48.6159			9.155	0.310427	31.0427			126	0.316269	31.6269
	11.475	0.486016	48.6016		348.3	0.48647	48.647			9.155	0.310626	31.0626			126	0.316471	31.6471
	11.475	0.486327	48.6327		348.8	0.486781	48.6781			9.155	0.310824	31.0824			126.2	0.316673	31.6673
	11.475	0.486638	48.6638		349	0.487092	48.7092			9.155	0.311023	31.1023			126.2	0.316876	31.6876
	11.475	0.486948	48.6948		349.3	0.487403	48.7403			9.155	0.311221	31.1221			126.2	0.317078	31.7078
	11.475	0.487259	48.7259		349.6	0.487714	48.7714			9.155	0.31142	31.142			126.2	0.31728	31.728
	11.475	0.48757	48.757		349.6	0.488025	48.8025			9.155	0.311619	31.1619			126.5	0.317483	31.7483
	11.475	0.487881	48.7881		349.9	0.488336	48.8336			9.155	0.311817	31.1817			126.5	0.317685	31.7685
	11.475	0.488191	48.8191		350.5	0.488647	48.8647			9.155	0.312016	31.2016			126.7	0.317887	31.7887
	11.475	0.488502	48.8502		351.2	0.488958	48.8958			9.155	0.312214	31.2214			126.8	0.31809	31.809
	11.475	0.488813	48.8813		351.5	0.489269	48.9269			9.155	0.312413	31.2413			126.9	0.318292	31.8292
	11.475	0.489124	48.9124		352	0.48958	48.958			9.155	0.312612	31.2612			126.9	0.318495	31.8495
	11.475	0.489434	48.9434		352.9	0.489891	48.9891			9.155	0.31281	31.281			126.9	0.318697	31.8697
	11.475	0.489745	48.9745		353.3	0.490202	49.0202			9.155	0.313009	31.3009			126.9	0.318899	31.8899
	11.475	0.490056	49.0056		353.4	0.490513	49.0513			9.155	0.313208	31.3208			127	0.319102	31.9102
	11.475	0.490367	49.0367		354.3	0.490824	49.0824			9.155	0.313406	31.3406			127.3	0.319304	31.9304
	11.475	0.490677	49.0677		355.3	0.491135	49.1135			9.155	0.313605	31.3605			127.3	0.319506	31.9506
	11.475	0.490988	49.0988		355.6	0.491446	49.1446			9.155	0.313803	31.3803			127.4	0.319709	31.9709
	11.536	0.491299	49.1299		355.8	0.491757	49.1757			9.216	0.314002	31.4002			127.5	0.319911	31.9911
	11.536	0.49161	49.161		356.1	0.492068	49.2068			9.216	0.314201	31.4201			127.6	0.320113	32.0113
	11.536	0.49192	49.192		356.5	0.492379	49.2379			9.216	0.314399	31.4399			127.8	0.320316	32.0316
	11.536	0.492231	49.2231		356.5	0.492691	49.2691			9.216	0.314598	31.4598			127.9	0.320518	32.0518
	11.536	0.492542	49.2542		356.7	0.493002	49.3002			9.216	0.314796	31.4796			127.9	0.32072	32.072
	11.536	0.492853	49.2853		356.8	0.493313	49.3313			9.216	0.314995	31.4995			127.9	0.320923	32.0923
	11.536	0.493163	49.3163		357	0.493624	49.3624			9.216	0.315194	31.5194			128.1	0.321125	32.1125
	11.536	0.493474	49.3474		357.1	0.493935	49.3935			9.216	0.315392	31.5392			128.1	0.321327	32.1327
	11.536	0.493785	49.3785		357.5	0.494246	49.4246			9.216	0.315591	31.5591			128.1	0.32153	32.153
	11.536	0.494096	49.4096		357.7	0.494557	49.4557			9.216	0.315789	31.5789			128.2	0.321732	32.1732
	11.536	0.494406	49.4406		359.2	0.494868	49.4868			9.216	0.315988	31.5988			128.3	0.321934	32.1934
	11.536	0.494717	49.4717		359.3	0.495179	49.5179			9.216	0.316187	31.6187			128.4	0.322137	32.2137
	11.536	0.495028	49.5028		360.6	0.49549	49.549			9.216	0.316385	31.6385			128.4	0.322339	32.2339
	11.536	0.495339	49.5339		360.7	0.495801	49.5801			9.216	0.316584	31.6584			128.5	0.322541	32.2541
	11.536	0.495649	49.5649		360.7	0.496112	49.6112			9.216	0.316783	31.6783			128.8	0.322744	32.2744
	11.536	0.49596	49.596		360.9	0.496423	49.6423			9.216	0.316981	31.6981			128.9	0.322946	32.2946
	11.536	0.496271	49.6271		360.9	0.496734	49.6734			9.216	0.31718	31.718			128.9	0.323149	32.3149
	11.536	0.496582	49.6582		361.3	0.497045	49.7045			9.216	0.317378	31.7378			129	0.323351	32.3351
	11.536	0.496892	49.6892		361.3	0.497356	49.7356			9.216	0.317577	31.7577			129	0.323553	32.3553
	11.536	0.497203	49.7203		361.4	0.497667	49.7667			9.216	0.317776	31.7776			129.1	0.323756	32.3756
	11.536	0.497514	49.7514		361.4	0.497978	49.7978			9.216	0.317974	31.7974			129.2	0.323958	32.3958
	11.597	0.497825	49.7825		361.5	0.498289	49.8289			9.216	0.318173	31.8173			129.3	0.32416	32.416
	11.597	0.498135	49.8135		362.1	0.4986	49.86			9.216	0.318371	31.8371			129.3	0.324363	32.4363
	11.597	0.498446	49.8446		362.2	0.498911	49.8911			9.216	0.31857	31.857			129.3	0.324565	32.4565
	11.597	0.498757	49.8757		363	0.499222	49.9222			9.216	0.318769	31.8769			129.6	0.324767	32.4767
	11.597	0.499068	49.9068		363.6	0.499533	49.9533			9.216	0.318967	31.8967			129.7	0.32497	32.497
	11.597	0.499378	49.9378		363.8	0.499844	49.9844			9.216	0.319166	31.9166			129.7	0.325172	32.5172
	11.597	0.499689	49.9689		364.1	0.500156	50.0156			9.216	0.319364	31.9364			130	0.325374	32.5374
	11.597	0.5	50		364.5	0.500467	50.0467			9.216	0.319563	31.9563			130.2	0.325577	32.5577
	11.597	0.500311	50.0311		364.7	0.500778	50.0778			9.216	0.319762	31.9762			130.2	0.325779	32.5779
	11.597	0.500622	50.0622		365.5	0.501089	50.1089			9.216	0.31996	31.996			130.3	0.325981	32.5981
	11.597	0.500932	50.0932		365.7	0.5014	50.14			9.216	0.320159	32.0159			130.3	0.326184	32.6184
	11.597	0.501243	50.1243		366.3	0.501711	50.1711			9.216	0.320357	32.0357			130.4	0.326386	32.6386
	11.597	0.501554	50.1554		367.1	0.502022	50.2022			9.216	0.320556	32.0556			130.7	0.326588	32.6588
	11.597	0.501865	50.1865		367.4	0.502333	50.2333			9.216	0.320755	32.0755			130.7	0.326791	32.6791
	11.597	0.502175	50.2175		367.5	0.502644	50.2644			9.277	0.320953	32.0953			130.7	0.326993	32.6993
	11.658	0.502486	50.2486		368	0.502955	50.2955			9.277	0.321152	32.1152			130.8	0.327195	32.7195
	11.658	0.502797	50.2797		368.3	0.503266	50.3266			9.277	0.321351	32.1351			130.8	0.327398	32.7398
	11.658	0.503108	50.3108		368.5	0.503577	50.3577			9.277	0.321549	32.1549			130.8	0.3276	32.76
	11.658	0.503418	50.3418		368.9	0.503888	50.3888			9.277	0.321748	32.1748			130.9	0.327803	32.7803
	11.658	0.503729	50.3729		368.9	0.504199	50.4199			9.277	0.321946	32.1946			131	0.328005	32.8005
	11.658	0.50404	50.404		369	0.50451	50.451			9.277	0.322145	32.2145			131.2	0.328207	32.8207
	11.658	0.504351	50.4351		369.1	0.504821	50.4821			9.277	0.322344	32.2344			131.2	0.32841	32.841
	11.658	0.504661	50.4661		369.2	0.505132	50.5132			9.277	0.322542	32.2542			131.3	0.328612	32.8612
	11.658	0.504972	50.4972		369.2	0.505443	50.5443			9.277	0.322741	32.2741			131.3	0.328814	32.8814
	11.658	0.505283	50.5283		369.7	0.505754	50.5754			9.277	0.322939	32.2939			131.3	0.329017	32.9017
	11.658	0.505594	50.5594		369.8	0.506065	50.6065			9.277	0.323138	32.3138			131.4	0.329219	32.9219
	11.658	0.505904	50.5904		371.5	0.506376	50.6376			9.277	0.323337	32.3337			131.4	0.329421	32.9421
	11.658	0.506215	50.6215		371.7	0.506687	50.6687			9.277	0.323535	32.3535			131.5	0.329624	32.9624
	11.658	0.506526	50.6526		372	0.506998	50.6998			9.277	0.323734	32.3734			131.5	0.329826	32.9826
	11.658	0.506837	50.6837		372.5	0.507309	50.7309			9.277	0.323932	32.3932			131.7	0.330028	33.0028
	11.719	0.507147	50.7147		373.3	0.507621	50.7621			9.277	0.324131	32.4131			131.7	0.330231	33.0231
	11.719	0.507458	50.7458		373.6	0.507932	50.7932			9.277	0.32433	32.433			131.8	0.330433	33.0433
	11.719	0.507769	50.7769		373.6	0.508243	50.8243			9.277	0.324528	32.4528			131.8	0.330635	33.0635
	11.719	0.50808	50.808		373.9	0.508554	50.8554			9.277	0.324727	32.4727			131.8	0.330838	33.0838
	11.719	0.50839	50.839		374.7	0.508865	50.8865			9.277	0.324926	32.4926			131.9	0.33104	33.104
	11.719	0.508701	50.8701		374.7	0.509176	50.9176			9.277	0.325124	32.5124			132	0.331242	33.1242
	11.719	0.509012	50.9012		375	0.509487	50.9487			9.277	0.325323	32.5323			132	0.331445	33.1445
	11.719	0.509323	50.9323		375.7	0.509798	50.9798			9.277	0.325521	32.5521			132	0.331647	33.1647
	11.719	0.509633	50.9633		375.9	0.510109	51.0109			9.277	0.32572	32.572			132.2	0.331849	33.1849
	11.719	0.509944	50.9944		376	0.51042	51.042			9.277	0.325919	32.5919			132.2	0.332052	33.2052
	11.719	0.510255	51.0255		376.4	0.510731	51.0731			9.277	0.326117	32.6117			132.3	0.332254	33.2254
	11.719	0.510566	51.0566		376.5	0.511042	51.1042			9.277	0.326316	32.6316			132.5	0.332456	33.2456
	11.719	0.510876	51.0876		376.6	0.511353	51.1353			9.277	0.326514	32.6514			132.5	0.332659	33.2659
	11.719	0.511187	51.1187		377.7	0.511664	51.1664			9.277	0.326713	32.6713			132.6	0.332861	33.2861
	11.719	0.511498	51.1498		378.2	0.511975	51.1975			9.277	0.326912	32.6912			132.7	0.333064	33.3064
	11.78	0.511809	51.1809		378.3	0.512286	51.2286			9.277	0.32711	32.711			132.7	0.333266	33.3266
	11.78	0.512119	51.2119		378.9	0.512597	51.2597			9.277	0.327309	32.7309			132.7	0.333468	33.3468
	11.78	0.51243	51.243		379.1	0.512908	51.2908			9.277	0.327507	32.7507			132.8	0.333671	33.3671
	11.78	0.512741	51.2741		379.4	0.513219	51.3219			9.277	0.327706	32.7706			132.9	0.333873	33.3873
	11.78	0.513052	51.3052		379.8	0.51353	51.353			9.277	0.327905	32.7905			133	0.334075	33.4075
	11.78	0.513362	51.3362		380.8	0.513841	51.3841			9.277	0.328103	32.8103			133.2	0.334278	33.4278
	11.78	0.513673	51.3673		382	0.514152	51.4152			9.277	0.328302	32.8302			133.3	0.33448	33.448
	11.78	0.513984	51.3984		382.3	0.514463	51.4463			9.338	0.3285	32.85			133.3	0.334682	33.4682
	11.78	0.514295	51.4295		383	0.514774	51.4774			9.338	0.328699	32.8699			133.3	0.334885	33.4885
	11.78	0.514605	51.4605		383	0.515086	51.5086			9.338	0.328898	32.8898			133.7	0.335087	33.5087
	11.78	0.514916	51.4916		383.4	0.515397	51.5397			9.338	0.329096	32.9096			133.7	0.335289	33.5289
	11.78	0.515227	51.5227		383.5	0.515708	51.5708			9.338	0.329295	32.9295			133.8	0.335492	33.5492
	11.841	0.515538	51.5538		383.5	0.516019	51.6019			9.338	0.329494	32.9494			133.9	0.335694	33.5694
	11.841	0.515848	51.5848		383.5	0.51633	51.633			9.338	0.329692	32.9692			133.9	0.335896	33.5896
	11.841	0.516159	51.6159		383.8	0.516641	51.6641			9.338	0.329891	32.9891			134	0.336099	33.6099
	11.841	0.51647	51.647		383.9	0.516952	51.6952			9.338	0.330089	33.0089			134.1	0.336301	33.6301
	11.841	0.516781	51.6781		384.2	0.517263	51.7263			9.338	0.330288	33.0288			134.1	0.336503	33.6503
	11.841	0.517091	51.7091		384.3	0.517574	51.7574			9.338	0.330487	33.0487			134.2	0.336706	33.6706
	11.841	0.517402	51.7402		384.5	0.517885	51.7885			9.338	0.330685	33.0685			134.3	0.336908	33.6908
	11.841	0.517713	51.7713		384.6	0.518196	51.8196			9.338	0.330884	33.0884			134.3	0.33711	33.711
	11.841	0.518024	51.8024		385.4	0.518507	51.8507			9.338	0.331082	33.1082			134.4	0.337313	33.7313
	11.841	0.518334	51.8334		385.4	0.518818	51.8818			9.338	0.331281	33.1281			134.4	0.337515	33.7515
	11.841	0.518645	51.8645		386.3	0.519129	51.9129			9.338	0.33148	33.148			134.5	0.337718	33.7718
	11.841	0.518956	51.8956		386.4	0.51944	51.944			9.338	0.331678	33.1678			134.8	0.33792	33.792
	11.902	0.519267	51.9267		386.7	0.519751	51.9751			9.338	0.331877	33.1877			134.8	0.338122	33.8122
	11.902	0.519577	51.9577		387.1	0.520062	52.0062			9.338	0.332075	33.2075			134.9	0.338325	33.8325
	11.902	0.519888	51.9888		387.6	0.520373	52.0373			9.338	0.332274	33.2274			135.1	0.338527	33.8527
	11.902	0.520199	52.0199		387.7	0.520684	52.0684			9.338	0.332473	33.2473			135.1	0.338729	33.8729
	11.902	0.52051	52.051		388.7	0.520995	52.0995			9.338	0.332671	33.2671			135.2	0.338932	33.8932
	11.902	0.52082	52.082		388.7	0.521306	52.1306			9.338	0.33287	33.287			135.3	0.339134	33.9134
	11.902	0.521131	52.1131		388.7	0.521617	52.1617			9.338	0.333069	33.3069			135.3	0.339336	33.9336
	11.902	0.521442	52.1442		389.2	0.521928	52.1928			9.338	0.333267	33.3267			135.4	0.339539	33.9539
	11.902	0.521753	52.1753		389.8	0.52224	52.224			9.338	0.333466	33.3466			135.5	0.339741	33.9741
	11.902	0.522063	52.2063		390.5	0.522551	52.2551			9.338	0.333664	33.3664			135.6	0.339943	33.9943
	11.902	0.522374	52.2374		390.6	0.522862	52.2862			9.338	0.333863	33.3863			135.7	0.340146	34.0146
	11.902	0.522685	52.2685		391.4	0.523173	52.3173			9.338	0.334062	33.4062			135.7	0.340348	34.0348
	11.902	0.522996	52.2996		391.7	0.523484	52.3484			9.338	0.33426	33.426			136	0.34055	34.055
	11.902	0.523306	52.3306		391.8	0.523795	52.3795			9.338	0.334459	33.4459			136	0.340753	34.0753
	11.902	0.523617	52.3617		392.1	0.524106	52.4106			9.338	0.334657	33.4657			136	0.340955	34.0955
	11.963	0.523928	52.3928		392.8	0.524417	52.4417			9.338	0.334856	33.4856			136.2	0.341157	34.1157
	11.963	0.524239	52.4239		392.8	0.524728	52.4728			9.338	0.335055	33.5055			136.2	0.34136	34.136
	11.963	0.524549	52.4549		392.8	0.525039	52.5039			9.338	0.335253	33.5253			136.2	0.341562	34.1562
	11.963	0.52486	52.486		393.3	0.52535	52.535			9.338	0.335452	33.5452			136.2	0.341764	34.1764
	11.963	0.525171	52.5171		393.6	0.525661	52.5661			9.338	0.33565	33.565			136.7	0.341967	34.1967
	11.963	0.525482	52.5482		393.7	0.525972	52.5972			9.399	0.335849	33.5849			137	0.342169	34.2169
	11.963	0.525792	52.5792		394.2	0.526283	52.6283			9.399	0.336048	33.6048			137	0.342372	34.2372
	11.963	0.526103	52.6103		395.1	0.526594	52.6594			9.399	0.336246	33.6246			137.1	0.342574	34.2574
	11.963	0.526414	52.6414		396.1	0.526905	52.6905			9.399	0.336445	33.6445			137.1	0.342776	34.2776
	11.963	0.526725	52.6725		396.4	0.527216	52.7216			9.399	0.336643	33.6643			137.1	0.342979	34.2979
	11.963	0.527035	52.7035		396.9	0.527527	52.7527			9.399	0.336842	33.6842			137.2	0.343181	34.3181
	11.963	0.527346	52.7346		397.2	0.527838	52.7838			9.399	0.337041	33.7041			137.3	0.343383	34.3383
	11.963	0.527657	52.7657		397.5	0.528149	52.8149			9.399	0.337239	33.7239			137.3	0.343586	34.3586
	12.024	0.527968	52.7968		398.3	0.52846	52.846			9.399	0.337438	33.7438			137.3	0.343788	34.3788
	12.024	0.528278	52.8278		398.9	0.528771	52.8771			9.399	0.337637	33.7637			137.4	0.34399	34.399
	12.024	0.528589	52.8589		399.4	0.529082	52.9082			9.399	0.337835	33.7835			137.4	0.344193	34.4193
	12.024	0.5289	52.89		400.1	0.529393	52.9393			9.399	0.338034	33.8034			137.4	0.344395	34.4395
	12.024	0.529211	52.9211		401	0.529705	52.9705			9.399	0.338232	33.8232			137.5	0.344597	34.4597
	12.024	0.529521	52.9521		401.4	0.530016	53.0016			9.399	0.338431	33.8431			137.5	0.3448	34.48
	12.024	0.529832	52.9832		401.9	0.530327	53.0327			9.399	0.33863	33.863			137.5	0.345002	34.5002
	12.024	0.530143	53.0143		402.1	0.530638	53.0638			9.399	0.338828	33.8828			137.7	0.345204	34.5204
	12.024	0.530454	53.0454		402.7	0.530949	53.0949			9.399	0.339027	33.9027			138	0.345407	34.5407
	12.024	0.530764	53.0764		403.1	0.53126	53.126			9.399	0.339225	33.9225			138	0.345609	34.5609
	12.085	0.531075	53.1075		403.2	0.531571	53.1571			9.399	0.339424	33.9424			138.1	0.345811	34.5811
	12.085	0.531386	53.1386		403.8	0.531882	53.1882			9.399	0.339623	33.9623			138.1	0.346014	34.6014
	12.085	0.531697	53.1697		404	0.532193	53.2193			9.399	0.339821	33.9821			138.5	0.346216	34.6216
	12.085	0.532007	53.2007		404.8	0.532504	53.2504			9.399	0.34002	34.002			138.5	0.346418	34.6418
	12.085	0.532318	53.2318		405.2	0.532815	53.2815			9.399	0.340218	34.0218			138.6	0.346621	34.6621
	12.085	0.532629	53.2629		405.6	0.533126	53.3126			9.399	0.340417	34.0417			138.6	0.346823	34.6823
	12.085	0.53294	53.294		405.6	0.533437	53.3437			9.399	0.340616	34.0616			138.7	0.347025	34.7025
	12.085	0.53325	53.325		406.2	0.533748	53.3748			9.399	0.340814	34.0814			138.7	0.347228	34.7228
	12.085	0.533561	53.3561		406.2	0.534059	53.4059			9.399	0.341013	34.1013			138.8	0.34743	34.743
	12.085	0.533872	53.3872		406.3	0.53437	53.437			9.399	0.341212	34.1212			138.8	0.347633	34.7633
	12.085	0.534183	53.4183		406.4	0.534681	53.4681			9.399	0.34141	34.141			139	0.347835	34.7835
	12.085	0.534493	53.4493		406.9	0.534992	53.4992			9.46	0.341609	34.1609			139.1	0.348037	34.8037
	12.085	0.534804	53.4804		406.9	0.535303	53.5303			9.46	0.341807	34.1807			139.1	0.34824	34.824
	12.085	0.535115	53.5115		407.2	0.535614	53.5614			9.46	0.342006	34.2006			139.1	0.348442	34.8442
	12.085	0.535426	53.5426		407.7	0.535925	53.5925			9.46	0.342205	34.2205			139.4	0.348644	34.8644
	12.085	0.535736	53.5736		407.9	0.536236	53.6236			9.46	0.342403	34.2403			139.5	0.348847	34.8847
	12.146	0.536047	53.6047		408	0.536547	53.6547			9.46	0.342602	34.2602			139.5	0.349049	34.9049
	12.146	0.536358	53.6358		408.4	0.536858	53.6858			9.46	0.3428	34.28			139.5	0.349251	34.9251
	12.146	0.536669	53.6669		408.7	0.53717	53.717			9.46	0.342999	34.2999			139.5	0.349454	34.9454
	12.146	0.536979	53.6979		409.1	0.537481	53.7481			9.46	0.343198	34.3198			139.5	0.349656	34.9656
	12.146	0.53729	53.729		409.6	0.537792	53.7792			9.46	0.343396	34.3396			139.6	0.349858	34.9858
	12.146	0.537601	53.7601		410.4	0.538103	53.8103			9.46	0.343595	34.3595			139.7	0.350061	35.0061
	12.146	0.537912	53.7912		410.4	0.538414	53.8414			9.46	0.343793	34.3793			140.1	0.350263	35.0263
	12.146	0.538222	53.8222		410.4	0.538725	53.8725			9.46	0.343992	34.3992			140.2	0.350465	35.0465
	12.146	0.538533	53.8533		410.9	0.539036	53.9036			9.46	0.344191	34.4191			140.2	0.350668	35.0668
	12.146	0.538844	53.8844		411.5	0.539347	53.9347			9.46	0.344389	34.4389			140.2	0.35087	35.087
	12.146	0.539155	53.9155		412.1	0.539658	53.9658			9.46	0.344588	34.4588			140.3	0.351072	35.1072
	12.146	0.539466	53.9466		412.3	0.539969	53.9969			9.46	0.344786	34.4786			140.3	0.351275	35.1275
	12.146	0.539776	53.9776		414.1	0.54028	54.028			9.46	0.344985	34.4985			140.4	0.351477	35.1477
	12.146	0.540087	54.0087		414.6	0.540591	54.0591			9.46	0.345184	34.5184			140.8	0.351679	35.1679
	12.146	0.540398	54.0398		414.7	0.540902	54.0902			9.46	0.345382	34.5382			140.8	0.351882	35.1882
	12.146	0.540709	54.0709		415.6	0.541213	54.1213			9.46	0.345581	34.5581			140.8	0.352084	35.2084
	12.207	0.541019	54.1019		415.6	0.541524	54.1524			9.46	0.34578	34.578			140.9	0.352287	35.2287
	12.207	0.54133	54.133		415.6	0.541835	54.1835			9.46	0.345978	34.5978			141	0.352489	35.2489
	12.207	0.541641	54.1641		416.7	0.542146	54.2146			9.521	0.346177	34.6177			141	0.352691	35.2691
	12.207	0.541952	54.1952		417.5	0.542457	54.2457			9.521	0.346375	34.6375			141	0.352894	35.2894
	12.207	0.542262	54.2262		417.6	0.542768	54.2768			9.521	0.346574	34.6574			141.1	0.353096	35.3096
	12.207	0.542573	54.2573		417.7	0.543079	54.3079			9.521	0.346773	34.6773			141.2	0.353298	35.3298
	12.207	0.542884	54.2884		417.9	0.54339	54.339			9.521	0.346971	34.6971			141.3	0.353501	35.3501
	12.207	0.543195	54.3195		418	0.543701	54.3701			9.521	0.34717	34.717			141.3	0.353703	35.3703
	12.207	0.543505	54.3505		418.4	0.544012	54.4012			9.521	0.347368	34.7368			141.3	0.353905	35.3905
	12.207	0.543816	54.3816		418.9	0.544323	54.4323			9.521	0.347567	34.7567			141.4	0.354108	35.4108
	12.207	0.544127	54.4127		419.1	0.544635	54.4635			9.521	0.347766	34.7766			141.6	0.35431	35.431
	12.207	0.544438	54.4438		419.2	0.544946	54.4946			9.521	0.347964	34.7964			142	0.354512	35.4512
	12.207	0.544748	54.4748		420	0.545257	54.5257			9.521	0.348163	34.8163			142.2	0.354715	35.4715
	12.207	0.545059	54.5059		420.1	0.545568	54.5568			9.521	0.348361	34.8361			142.2	0.354917	35.4917
	12.207	0.54537	54.537		420.2	0.545879	54.5879			9.521	0.34856	34.856			142.4	0.355119	35.5119
	12.207	0.545681	54.5681		420.3	0.54619	54.619			9.521	0.348759	34.8759			142.4	0.355322	35.5322
	12.207	0.545991	54.5991		420.7	0.546501	54.6501			9.521	0.348957	34.8957			142.5	0.355524	35.5524
	12.207	0.546302	54.6302		420.7	0.546812	54.6812			9.521	0.349156	34.9156			142.6	0.355726	35.5726
	12.268	0.546613	54.6613		421.3	0.547123	54.7123			9.521	0.349355	34.9355			142.7	0.355929	35.5929
	12.268	0.546924	54.6924		421.5	0.547434	54.7434			9.521	0.349553	34.9553			142.7	0.356131	35.6131
	12.268	0.547234	54.7234		421.6	0.547745	54.7745			9.521	0.349752	34.9752			142.8	0.356333	35.6333
	12.268	0.547545	54.7545		421.9	0.548056	54.8056			9.521	0.34995	34.995			142.9	0.356536	35.6536
	12.268	0.547856	54.7856		422.2	0.548367	54.8367			9.521	0.350149	35.0149			143.1	0.356738	35.6738
	12.268	0.548167	54.8167		422.3	0.548678	54.8678			9.521	0.350348	35.0348			143.2	0.356941	35.6941
	12.268	0.548477	54.8477		422.6	0.548989	54.8989			9.521	0.350546	35.0546			143.2	0.357143	35.7143
	12.268	0.548788	54.8788		423.6	0.5493	54.93			9.521	0.350745	35.0745			143.3	0.357345	35.7345
	12.268	0.549099	54.9099		423.6	0.549611	54.9611			9.521	0.350943	35.0943			143.3	0.357548	35.7548
	12.268	0.54941	54.941		424	0.549922	54.9922			9.521	0.351142	35.1142			143.5	0.35775	35.775
	12.268	0.54972	54.972		424.2	0.550233	55.0233			9.521	0.351341	35.1341			143.6	0.357952	35.7952
	12.268	0.550031	55.0031		424.7	0.550544	55.0544			9.521	0.351539	35.1539			143.7	0.358155	35.8155
	12.268	0.550342	55.0342		425.2	0.550855	55.0855			9.521	0.351738	35.1738			143.8	0.358357	35.8357
	12.268	0.550653	55.0653		425.6	0.551166	55.1166			9.521	0.351936	35.1936			144	0.358559	35.8559
	12.329	0.550963	55.0963		426.5	0.551477	55.1477			9.521	0.352135	35.2135			144.1	0.358762	35.8762
	12.329	0.551274	55.1274		426.6	0.551788	55.1788			9.521	0.352334	35.2334			144.1	0.358964	35.8964
	12.329	0.551585	55.1585		426.7	0.5521	55.21			9.521	0.352532	35.2532			144.2	0.359166	35.9166
	12.329	0.551896	55.1896		427	0.552411	55.2411			9.583	0.352731	35.2731			144.4	0.359369	35.9369
	12.329	0.552206	55.2206		427	0.552722	55.2722			9.583	0.352929	35.2929			144.5	0.359571	35.9571
	12.329	0.552517	55.2517		427.4	0.553033	55.3033			9.583	0.353128	35.3128			144.6	0.359773	35.9773
	12.329	0.552828	55.2828		428.2	0.553344	55.3344			9.583	0.353327	35.3327			144.6	0.359976	35.9976
	12.329	0.553139	55.3139		428.4	0.553655	55.3655			9.583	0.353525	35.3525			145	0.360178	36.0178
	12.329	0.553449	55.3449		428.7	0.553966	55.3966			9.583	0.353724	35.3724			145	0.36038	36.038
	12.329	0.55376	55.376		430.5	0.554277	55.4277			9.583	0.353923	35.3923			145.1	0.360583	36.0583
	12.329	0.554071	55.4071		431	0.554588	55.4588			9.583	0.354121	35.4121			145.1	0.360785	36.0785
	12.329	0.554382	55.4382		431	0.554899	55.4899			9.583	0.35432	35.432			145.3	0.360987	36.0987
	12.329	0.554692	55.4692		431.1	0.55521	55.521			9.583	0.354518	35.4518			145.3	0.36119	36.119
	12.329	0.555003	55.5003		432.1	0.555521	55.5521			9.583	0.354717	35.4717			145.4	0.361392	36.1392
	12.329	0.555314	55.5314		432.5	0.555832	55.5832			9.583	0.354916	35.4916			145.4	0.361594	36.1594
	12.329	0.555625	55.5625		432.6	0.556143	55.6143			9.583	0.355114	35.5114			145.7	0.361797	36.1797
	12.329	0.555935	55.5935		432.8	0.556454	55.6454			9.583	0.355313	35.5313			145.7	0.361999	36.1999
	12.329	0.556246	55.6246		433	0.556765	55.6765			9.583	0.355511	35.5511			145.9	0.362202	36.2202
	12.39	0.556557	55.6557		433.1	0.557076	55.7076			9.583	0.35571	35.571			145.9	0.362404	36.2404
	12.39	0.556868	55.6868		434.5	0.557387	55.7387			9.583	0.355909	35.5909			146	0.362606	36.2606
	12.39	0.557178	55.7178		434.6	0.557698	55.7698			9.583	0.356107	35.6107			146.1	0.362809	36.2809
	12.39	0.557489	55.7489		434.7	0.558009	55.8009			9.583	0.356306	35.6306			146.1	0.363011	36.3011
	12.39	0.5578	55.78		434.7	0.55832	55.832			9.583	0.356504	35.6504			146.1	0.363213	36.3213
	12.39	0.558111	55.8111		435.8	0.558631	55.8631			9.583	0.356703	35.6703			146.2	0.363416	36.3416
	12.39	0.558421	55.8421		435.8	0.558942	55.8942			9.583	0.356902	35.6902			146.4	0.363618	36.3618
	12.39	0.558732	55.8732		436.4	0.559253	55.9253			9.583	0.3571	35.71			146.8	0.36382	36.382
	12.39	0.559043	55.9043		436.5	0.559565	55.9565			9.583	0.357299	35.7299			146.8	0.364023	36.4023
	12.39	0.559354	55.9354		436.9	0.559876	55.9876			9.583	0.357498	35.7498			146.8	0.364225	36.4225
	12.39	0.559664	55.9664		437.3	0.560187	56.0187			9.583	0.357696	35.7696			146.9	0.364427	36.4427
	12.39	0.559975	55.9975		437.8	0.560498	56.0498			9.583	0.357895	35.7895			146.9	0.36463	36.463
	12.39	0.560286	56.0286		438.1	0.560809	56.0809			9.583	0.358093	35.8093			147.1	0.364832	36.4832
	12.451	0.560597	56.0597		438.9	0.56112	56.112			9.583	0.358292	35.8292			147.2	0.365034	36.5034
	12.451	0.560907	56.0907		439	0.561431	56.1431			9.583	0.358491	35.8491			147.3	0.365237	36.5237
	12.451	0.561218	56.1218		440.6	0.561742	56.1742			9.583	0.358689	35.8689			147.3	0.365439	36.5439
	12.451	0.561529	56.1529		441.7	0.562053	56.2053			9.583	0.358888	35.8888			147.4	0.365641	36.5641
	12.451	0.56184	56.184		442	0.562364	56.2364			9.583	0.359086	35.9086			147.4	0.365844	36.5844
	12.451	0.56215	56.215		442.2	0.562675	56.2675			9.583	0.359285	35.9285			147.4	0.366046	36.6046
	12.451	0.562461	56.2461		442.3	0.562986	56.2986			9.583	0.359484	35.9484			147.6	0.366248	36.6248
	12.451	0.562772	56.2772		442.5	0.563297	56.3297			9.644	0.359682	35.9682			147.6	0.366451	36.6451
	12.451	0.563083	56.3083		442.8	0.563608	56.3608			9.644	0.359881	35.9881			147.8	0.366653	36.6653
	12.451	0.563393	56.3393		443.5	0.563919	56.3919			9.644	0.360079	36.0079			147.9	0.366856	36.6856
	12.512	0.563704	56.3704		443.7	0.56423	56.423			9.644	0.360278	36.0278			148	0.367058	36.7058
	12.512	0.564015	56.4015		444.7	0.564541	56.4541			9.644	0.360477	36.0477			148	0.36726	36.726
	12.512	0.564326	56.4326		444.7	0.564852	56.4852			9.644	0.360675	36.0675			148	0.367463	36.7463
	12.512	0.564636	56.4636		445.7	0.565163	56.5163			9.644	0.360874	36.0874			148.1	0.367665	36.7665
	12.512	0.564947	56.4947		446.7	0.565474	56.5474			9.644	0.361072	36.1072			148.3	0.367867	36.7867
	12.512	0.565258	56.5258		447.4	0.565785	56.5785			9.644	0.361271	36.1271			148.4	0.36807	36.807
	12.512	0.565569	56.5569		447.5	0.566096	56.6096			9.644	0.36147	36.147			148.5	0.368272	36.8272
	12.512	0.565879	56.5879		448.1	0.566407	56.6407			9.644	0.361668	36.1668			148.5	0.368474	36.8474
	12.512	0.56619	56.619		448.1	0.566719	56.6719			9.644	0.361867	36.1867			148.5	0.368677	36.8677
	12.512	0.566501	56.6501		448.5	0.56703	56.703			9.644	0.362066	36.2066			148.6	0.368879	36.8879
	12.512	0.566812	56.6812		450.3	0.567341	56.7341			9.644	0.362264	36.2264			148.7	0.369081	36.9081
	12.512	0.567122	56.7122		450.5	0.567652	56.7652			9.644	0.362463	36.2463			148.8	0.369284	36.9284
	12.512	0.567433	56.7433		450.6	0.567963	56.7963			9.644	0.362661	36.2661			148.9	0.369486	36.9486
	12.512	0.567744	56.7744		451.2	0.568274	56.8274			9.644	0.36286	36.286			149	0.369688	36.9688
	12.512	0.568055	56.8055		451.7	0.568585	56.8585			9.644	0.363059	36.3059			149	0.369891	36.9891
	12.512	0.568365	56.8365		452	0.568896	56.8896			9.644	0.363257	36.3257			149.1	0.370093	37.0093
	12.512	0.568676	56.8676		452.3	0.569207	56.9207			9.644	0.363456	36.3456			149.2	0.370295	37.0295
	12.512	0.568987	56.8987		453	0.569518	56.9518			9.644	0.363654	36.3654			149.5	0.370498	37.0498
	12.512	0.569298	56.9298		453.1	0.569829	56.9829			9.644	0.363853	36.3853			149.5	0.3707	37.07
	12.512	0.569608	56.9608		453.4	0.57014	57.014			9.644	0.364052	36.4052			149.5	0.370902	37.0902
	12.512	0.569919	56.9919		453.6	0.570451	57.0451			9.644	0.36425	36.425			149.6	0.371105	37.1105
	12.512	0.57023	57.023		453.6	0.570762	57.0762			9.644	0.364449	36.4449			149.6	0.371307	37.1307
	12.512	0.570541	57.0541		453.6	0.571073	57.1073			9.644	0.364647	36.4647			149.6	0.37151	37.151
	12.573	0.570851	57.0851		453.9	0.571384	57.1384			9.644	0.364846	36.4846			149.7	0.371712	37.1712
	12.573	0.571162	57.1162		454.9	0.571695	57.1695			9.644	0.365045	36.5045			149.7	0.371914	37.1914
	12.573	0.571473	57.1473		455.1	0.572006	57.2006			9.644	0.365243	36.5243			149.8	0.372117	37.2117
	12.573	0.571784	57.1784		455.4	0.572317	57.2317			9.644	0.365442	36.5442			149.9	0.372319	37.2319
	12.573	0.572094	57.2094		455.5	0.572628	57.2628			9.644	0.365641	36.5641			150	0.372521	37.2521
	12.573	0.572405	57.2405		455.5	0.572939	57.2939			9.644	0.365839	36.5839			150.2	0.372724	37.2724
	12.573	0.572716	57.2716		456.2	0.57325	57.325			9.644	0.366038	36.6038			150.3	0.372926	37.2926
	12.573	0.573027	57.3027		457.8	0.573561	57.3561			9.644	0.366236	36.6236			150.4	0.373128	37.3128
	12.573	0.573337	57.3337		458	0.573872	57.3872			9.644	0.366435	36.6435			150.8	0.373331	37.3331
	12.573	0.573648	57.3648		458.7	0.574184	57.4184			9.644	0.366634	36.6634			150.9	0.373533	37.3533
	12.573	0.573959	57.3959		458.8	0.574495	57.4495			9.705	0.366832	36.6832			151.3	0.373735	37.3735
	12.573	0.57427	57.427		459.6	0.574806	57.4806			9.705	0.367031	36.7031			151.3	0.373938	37.3938
	12.573	0.57458	57.458		460	0.575117	57.5117			9.705	0.367229	36.7229			151.5	0.37414	37.414
	12.573	0.574891	57.4891		460.3	0.575428	57.5428			9.705	0.367428	36.7428			151.5	0.374342	37.4342
	12.573	0.575202	57.5202		460.4	0.575739	57.5739			9.705	0.367627	36.7627			151.5	0.374545	37.4545
	12.634	0.575513	57.5513		461.3	0.57605	57.605			9.705	0.367825	36.7825			152.1	0.374747	37.4747
	12.634	0.575823	57.5823		461.6	0.576361	57.6361			9.705	0.368024	36.8024			152.2	0.374949	37.4949
	12.634	0.576134	57.6134		462.1	0.576672	57.6672			9.705	0.368222	36.8222			152.2	0.375152	37.5152
	12.634	0.576445	57.6445		462.4	0.576983	57.6983			9.705	0.368421	36.8421			152.3	0.375354	37.5354
	12.634	0.576756	57.6756		462.5	0.577294	57.7294			9.705	0.36862	36.862			152.3	0.375556	37.5556
	12.634	0.577067	57.7067		463.2	0.577605	57.7605			9.705	0.368818	36.8818			152.4	0.375759	37.5759
	12.634	0.577377	57.7377		463.2	0.577916	57.7916			9.705	0.369017	36.9017			152.4	0.375961	37.5961
	12.634	0.577688	57.7688		463.8	0.578227	57.8227			9.705	0.369215	36.9215			152.4	0.376163	37.6163
	12.634	0.577999	57.7999		463.8	0.578538	57.8538			9.705	0.369414	36.9414			152.5	0.376366	37.6366
	12.634	0.57831	57.831		464.3	0.578849	57.8849			9.705	0.369613	36.9613			152.5	0.376568	37.6568
	12.634	0.57862	57.862		464.4	0.57916	57.916			9.705	0.369811	36.9811			152.5	0.376771	37.6771
	12.634	0.578931	57.8931		465	0.579471	57.9471			9.705	0.37001	37.001			152.7	0.376973	37.6973
	12.634	0.579242	57.9242		465	0.579782	57.9782			9.705	0.370209	37.0209			152.7	0.377175	37.7175
	12.634	0.579553	57.9553		465.1	0.580093	58.0093			9.705	0.370407	37.0407			153	0.377378	37.7378
	12.634	0.579863	57.9863		465.5	0.580404	58.0404			9.705	0.370606	37.0606			153	0.37758	37.758
	12.634	0.580174	58.0174		468.4	0.580715	58.0715			9.705	0.370804	37.0804			153	0.377782	37.7782
	12.695	0.580485	58.0485		468.5	0.581026	58.1026			9.705	0.371003	37.1003			153.2	0.377985	37.7985
	12.695	0.580796	58.0796		468.6	0.581337	58.1337			9.705	0.371202	37.1202			153.2	0.378187	37.8187
	12.695	0.581106	58.1106		472	0.581649	58.1649			9.705	0.3714	37.14			153.3	0.378389	37.8389
	12.695	0.581417	58.1417		472.4	0.58196	58.196			9.705	0.371599	37.1599			153.4	0.378592	37.8592
	12.695	0.581728	58.1728		473.2	0.582271	58.2271			9.705	0.371797	37.1797			153.7	0.378794	37.8794
	12.695	0.582039	58.2039		473.5	0.582582	58.2582			9.705	0.371996	37.1996			153.7	0.378996	37.8996
	12.695	0.582349	58.2349		475.1	0.582893	58.2893			9.705	0.372195	37.2195			153.9	0.379199	37.9199
	12.695	0.58266	58.266		476.5	0.583204	58.3204			9.705	0.372393	37.2393			153.9	0.379401	37.9401
	12.695	0.582971	58.2971		477.1	0.583515	58.3515			9.705	0.372592	37.2592			154	0.379603	37.9603
	12.695	0.583282	58.3282		478.5	0.583826	58.3826			9.705	0.37279	37.279			154	0.379806	37.9806
	12.695	0.583592	58.3592		479	0.584137	58.4137			9.705	0.372989	37.2989			154.2	0.380008	38.0008
	12.695	0.583903	58.3903		479.5	0.584448	58.4448			9.705	0.373188	37.3188			154.2	0.38021	38.021
	12.695	0.584214	58.4214		479.6	0.584759	58.4759			9.705	0.373386	37.3386			154.2	0.380413	38.0413
	12.695	0.584525	58.4525		480.2	0.58507	58.507			9.705	0.373585	37.3585			154.3	0.380615	38.0615
	12.695	0.584835	58.4835		480.5	0.585381	58.5381			9.705	0.373784	37.3784			154.4	0.380817	38.0817
	12.695	0.585146	58.5146		480.8	0.585692	58.5692			9.705	0.373982	37.3982			154.5	0.38102	38.102
	12.695	0.585457	58.5457		481.4	0.586003	58.6003			9.705	0.374181	37.4181			154.7	0.381222	38.1222
	12.695	0.585768	58.5768		482.6	0.586314	58.6314			9.705	0.374379	37.4379			154.8	0.381425	38.1425
	12.695	0.586078	58.6078		482.6	0.586625	58.6625			9.705	0.374578	37.4578			154.9	0.381627	38.1627
	12.695	0.586389	58.6389		483.6	0.586936	58.6936			9.705	0.374777	37.4777			155.2	0.381829	38.1829
	12.695	0.5867	58.67		483.6	0.587247	58.7247			9.705	0.374975	37.4975			155.3	0.382032	38.2032
	12.756	0.587011	58.7011		484.1	0.587558	58.7558			9.766	0.375174	37.5174			155.5	0.382234	38.2234
	12.756	0.587321	58.7321		484.5	0.587869	58.7869			9.766	0.375372	37.5372			155.8	0.382436	38.2436
	12.756	0.587632	58.7632		485.3	0.58818	58.818			9.766	0.375571	37.5571			156	0.382639	38.2639
	12.756	0.587943	58.7943		485.4	0.588491	58.8491			9.766	0.37577	37.577			156.1	0.382841	38.2841
	12.756	0.588254	58.8254		486.2	0.588802	58.8802			9.766	0.375968	37.5968			156.2	0.383043	38.3043
	12.756	0.588564	58.8564		487.7	0.589114	58.9114			9.766	0.376167	37.6167			156.3	0.383246	38.3246
	12.756	0.588875	58.8875		488.7	0.589425	58.9425			9.766	0.376365	37.6365			156.3	0.383448	38.3448
	12.756	0.589186	58.9186		489.1	0.589736	58.9736			9.766	0.376564	37.6564			156.3	0.38365	38.365
	12.756	0.589497	58.9497		489.5	0.590047	59.0047			9.766	0.376763	37.6763			156.4	0.383853	38.3853
	12.756	0.589807	58.9807		489.5	0.590358	59.0358			9.766	0.376961	37.6961			156.5	0.384055	38.4055
	12.756	0.590118	59.0118		489.6	0.590669	59.0669			9.766	0.37716	37.716			156.5	0.384257	38.4257
	12.756	0.590429	59.0429		489.9	0.59098	59.098			9.766	0.377358	37.7358			156.5	0.38446	38.446
	12.756	0.59074	59.074		490	0.591291	59.1291			9.766	0.377557	37.7557			156.6	0.384662	38.4662
	12.756	0.59105	59.105		490.5	0.591602	59.1602			9.766	0.377756	37.7756			156.7	0.384864	38.4864
	12.756	0.591361	59.1361		490.8	0.591913	59.1913			9.766	0.377954	37.7954			156.8	0.385067	38.5067
	12.756	0.591672	59.1672		491.8	0.592224	59.2224			9.766	0.378153	37.8153			156.8	0.385269	38.5269
	12.756	0.591983	59.1983		492.2	0.592535	59.2535			9.766	0.378352	37.8352			156.9	0.385471	38.5471
	12.756	0.592293	59.2293		492.3	0.592846	59.2846			9.766	0.37855	37.855			156.9	0.385674	38.5674
	12.756	0.592604	59.2604		492.3	0.593157	59.3157			9.766	0.378749	37.8749			156.9	0.385876	38.5876
	12.817	0.592915	59.2915		492.4	0.593468	59.3468			9.766	0.378947	37.8947			156.9	0.386079	38.6079
	12.817	0.593226	59.3226		492.9	0.593779	59.3779			9.766	0.379146	37.9146			156.9	0.386281	38.6281
	12.817	0.593536	59.3536		493.1	0.59409	59.409			9.766	0.379345	37.9345			157	0.386483	38.6483
	12.817	0.593847	59.3847		493.1	0.594401	59.4401			9.766	0.379543	37.9543			157	0.386686	38.6686
	12.817	0.594158	59.4158		493.3	0.594712	59.4712			9.766	0.379742	37.9742			157	0.386888	38.6888
	12.817	0.594469	59.4469		493.4	0.595023	59.5023			9.766	0.37994	37.994			157.1	0.38709	38.709
	12.817	0.594779	59.4779		493.9	0.595334	59.5334			9.766	0.380139	38.0139			157.2	0.387293	38.7293
	12.817	0.59509	59.509		494	0.595645	59.5645			9.766	0.380338	38.0338			157.2	0.387495	38.7495
	12.817	0.595401	59.5401		494.3	0.595956	59.5956			9.766	0.380536	38.0536			157.2	0.387697	38.7697
	12.817	0.595712	59.5712		494.3	0.596267	59.6267			9.766	0.380735	38.0735			157.3	0.3879	38.79
	12.817	0.596022	59.6022		494.9	0.596579	59.6579			9.766	0.380933	38.0933			157.4	0.388102	38.8102
	12.817	0.596333	59.6333		497.4	0.59689	59.689			9.766	0.381132	38.1132			157.5	0.388304	38.8304
	12.817	0.596644	59.6644		497.6	0.597201	59.7201			9.766	0.381331	38.1331			157.5	0.388507	38.8507
	12.878	0.596955	59.6955		497.9	0.597512	59.7512			9.766	0.381529	38.1529			157.6	0.388709	38.8709
	12.878	0.597265	59.7265		498	0.597823	59.7823			9.766	0.381728	38.1728			157.7	0.388911	38.8911
	12.878	0.597576	59.7576		499.8	0.598134	59.8134			9.766	0.381927	38.1927			158.4	0.389114	38.9114
	12.878	0.597887	59.7887		500.2	0.598445	59.8445			9.766	0.382125	38.2125			158.5	0.389316	38.9316
	12.878	0.598198	59.8198		500.4	0.598756	59.8756			9.766	0.382324	38.2324			158.5	0.389518	38.9518
	12.878	0.598508	59.8508		500.9	0.599067	59.9067			9.827	0.382522	38.2522			158.7	0.389721	38.9721
	12.878	0.598819	59.8819		501.4	0.599378	59.9378			9.827	0.382721	38.2721			159.3	0.389923	38.9923
	12.878	0.59913	59.913		501.6	0.599689	59.9689			9.827	0.38292	38.292			159.3	0.390125	39.0125
	12.878	0.599441	59.9441		501.6	0.6	60			9.827	0.383118	38.3118			159.6	0.390328	39.0328
	12.939	0.599751	59.9751		501.7	0.600311	60.0311			9.827	0.383317	38.3317			159.6	0.39053	39.053
	12.939	0.600062	60.0062		502	0.600622	60.0622			9.827	0.383515	38.3515			159.7	0.390732	39.0732
	12.939	0.600373	60.0373		502.2	0.600933	60.0933			9.827	0.383714	38.3714			159.7	0.390935	39.0935
	12.939	0.600684	60.0684		502.4	0.601244	60.1244			9.827	0.383913	38.3913			160	0.391137	39.1137
	12.939	0.600994	60.0994		502.5	0.601555	60.1555			9.827	0.384111	38.4111			160	0.39134	39.134
	12.939	0.601305	60.1305		502.9	0.601866	60.1866			9.827	0.38431	38.431			160.1	0.391542	39.1542
	12.939	0.601616	60.1616		503.9	0.602177	60.2177			9.827	0.384508	38.4508			160.2	0.391744	39.1744
	12.939	0.601927	60.1927		507.5	0.602488	60.2488			9.827	0.384707	38.4707			160.2	0.391947	39.1947
	12.939	0.602237	60.2237		507.5	0.602799	60.2799			9.827	0.384906	38.4906			160.4	0.392149	39.2149
	12.939	0.602548	60.2548		507.9	0.60311	60.311			9.827	0.385104	38.5104			160.4	0.392351	39.2351
	12.939	0.602859	60.2859		509.2	0.603421	60.3421			9.827	0.385303	38.5303			160.5	0.392554	39.2554
	12.939	0.60317	60.317		509.5	0.603733	60.3733			9.827	0.385501	38.5501			160.6	0.392756	39.2756
	12.939	0.60348	60.348		509.6	0.604044	60.4044			9.827	0.3857	38.57			160.7	0.392958	39.2958
	13	0.603791	60.3791		510.1	0.604355	60.4355			9.827	0.385899	38.5899			160.7	0.393161	39.3161
	13	0.604102	60.4102		510.1	0.604666	60.4666			9.827	0.386097	38.6097			160.8	0.393363	39.3363
	13	0.604413	60.4413		510.8	0.604977	60.4977			9.827	0.386296	38.6296			160.8	0.393565	39.3565
	13	0.604723	60.4723		511.6	0.605288	60.5288			9.827	0.386495	38.6495			161.2	0.393768	39.3768
	13	0.605034	60.5034		512	0.605599	60.5599			9.827	0.386693	38.6693			161.3	0.39397	39.397
	13	0.605345	60.5345		513.1	0.60591	60.591			9.827	0.386892	38.6892			161.4	0.394172	39.4172
	13	0.605656	60.5656		513.2	0.606221	60.6221			9.827	0.38709	38.709			161.5	0.394375	39.4375
	13	0.605966	60.5966		513.5	0.606532	60.6532			9.827	0.387289	38.7289			161.5	0.394577	39.4577
	13	0.606277	60.6277		515.3	0.606843	60.6843			9.827	0.387488	38.7488			161.5	0.394779	39.4779
	13	0.606588	60.6588		517.9	0.607154	60.7154			9.827	0.387686	38.7686			161.8	0.394982	39.4982
	13	0.606899	60.6899		518	0.607465	60.7465			9.827	0.387885	38.7885			162.2	0.395184	39.5184
	13.062	0.607209	60.7209		518.4	0.607776	60.7776			9.827	0.388083	38.8083			162.3	0.395386	39.5386
	13.062	0.60752	60.752		518.7	0.608087	60.8087			9.888	0.388282	38.8282			162.5	0.395589	39.5589
	13.062	0.607831	60.7831		519.1	0.608398	60.8398			9.888	0.388481	38.8481			162.5	0.395791	39.5791
	13.062	0.608142	60.8142		519.6	0.608709	60.8709			9.888	0.388679	38.8679			162.5	0.395994	39.5994
	13.062	0.608452	60.8452		519.8	0.60902	60.902			9.888	0.388878	38.8878			162.5	0.396196	39.6196
	13.062	0.608763	60.8763		521.1	0.609331	60.9331			9.888	0.389076	38.9076			162.8	0.396398	39.6398
	13.062	0.609074	60.9074		521.5	0.609642	60.9642			9.888	0.389275	38.9275			162.8	0.396601	39.6601
	13.062	0.609385	60.9385		521.7	0.609953	60.9953			9.888	0.389474	38.9474			162.8	0.396803	39.6803
	13.062	0.609695	60.9695		522.1	0.610264	61.0264			9.888	0.389672	38.9672			162.9	0.397005	39.7005
	13.062	0.610006	61.0006		522.5	0.610575	61.0575			9.888	0.389871	38.9871			163	0.397208	39.7208
	13.062	0.610317	61.0317		522.9	0.610886	61.0886			9.888	0.39007	39.007			163.2	0.39741	39.741
	13.062	0.610628	61.0628		523.2	0.611198	61.1198			9.888	0.390268	39.0268			163.2	0.397612	39.7612
	13.062	0.610938	61.0938		524.8	0.611509	61.1509			9.888	0.390467	39.0467			163.3	0.397815	39.7815
	13.062	0.611249	61.1249		525	0.61182	61.182			9.888	0.390665	39.0665			163.3	0.398017	39.8017
	13.062	0.61156	61.156		525.4	0.612131	61.2131			9.888	0.390864	39.0864			163.5	0.398219	39.8219
	13.123	0.611871	61.1871		525.4	0.612442	61.2442			9.888	0.391063	39.1063			163.6	0.398422	39.8422
	13.123	0.612181	61.2181		526.4	0.612753	61.2753			9.888	0.391261	39.1261			163.7	0.398624	39.8624
	13.123	0.612492	61.2492		528.2	0.613064	61.3064			9.888	0.39146	39.146			163.8	0.398826	39.8826
	13.123	0.612803	61.2803		528.4	0.613375	61.3375			9.888	0.391658	39.1658			164	0.399029	39.9029
	13.123	0.613114	61.3114		528.6	0.613686	61.3686			9.888	0.391857	39.1857			164	0.399231	39.9231
	13.123	0.613424	61.3424		528.6	0.613997	61.3997			9.888	0.392056	39.2056			164.2	0.399433	39.9433
	13.123	0.613735	61.3735		529.3	0.614308	61.4308			9.888	0.392254	39.2254			164.3	0.399636	39.9636
	13.123	0.614046	61.4046		529.7	0.614619	61.4619			9.888	0.392453	39.2453			164.3	0.399838	39.9838
	13.123	0.614357	61.4357		530.4	0.61493	61.493			9.888	0.392651	39.2651			164.3	0.40004	40.004
	13.123	0.614667	61.4667		530.8	0.615241	61.5241			9.888	0.39285	39.285			164.5	0.400243	40.0243
	13.184	0.614978	61.4978		531	0.615552	61.5552			9.888	0.393049	39.3049			164.6	0.400445	40.0445
	13.184	0.615289	61.5289		532.3	0.615863	61.5863			9.888	0.393247	39.3247			164.8	0.400648	40.0648
	13.184	0.6156	61.56		532.6	0.616174	61.6174			9.888	0.393446	39.3446			164.9	0.40085	40.085
	13.184	0.615911	61.5911		533.9	0.616485	61.6485			9.888	0.393644	39.3644			165	0.401052	40.1052
	13.184	0.616221	61.6221		533.9	0.616796	61.6796			9.949	0.393843	39.3843			165.1	0.401255	40.1255
	13.245	0.616532	61.6532		534.9	0.617107	61.7107			9.949	0.394042	39.4042			165.5	0.401457	40.1457
	13.245	0.616843	61.6843		535.2	0.617418	61.7418			9.949	0.39424	39.424			165.6	0.401659	40.1659
	13.245	0.617154	61.7154		537.7	0.617729	61.7729			9.949	0.394439	39.4439			165.7	0.401862	40.1862
	13.245	0.617464	61.7464		538.7	0.61804	61.804			9.949	0.394638	39.4638			165.7	0.402064	40.2064
	13.245	0.617775	61.7775		538.7	0.618351	61.8351			9.949	0.394836	39.4836			165.7	0.402266	40.2266
	13.245	0.618086	61.8086		538.8	0.618663	61.8663			9.949	0.395035	39.5035			165.7	0.402469	40.2469
	13.245	0.618397	61.8397		539.2	0.618974	61.8974			9.949	0.395233	39.5233			165.9	0.402671	40.2671
	13.245	0.618707	61.8707		539.8	0.619285	61.9285			9.949	0.395432	39.5432			166	0.402873	40.2873
	13.245	0.619018	61.9018		540.6	0.619596	61.9596			9.949	0.395631	39.5631			166	0.403076	40.3076
	13.245	0.619329	61.9329		541.4	0.619907	61.9907			9.949	0.395829	39.5829			166.1	0.403278	40.3278
	13.245	0.61964	61.964		541.8	0.620218	62.0218			9.949	0.396028	39.6028			166.2	0.40348	40.348
	13.245	0.61995	61.995		541.8	0.620529	62.0529			9.949	0.396226	39.6226			166.3	0.403683	40.3683
	13.245	0.620261	62.0261		541.9	0.62084	62.084			9.949	0.396425	39.6425			166.4	0.403885	40.3885
	13.245	0.620572	62.0572		543.2	0.621151	62.1151			9.949	0.396624	39.6624			166.5	0.404087	40.4087
	13.245	0.620883	62.0883		543.4	0.621462	62.1462			9.949	0.396822	39.6822			166.5	0.40429	40.429
	13.245	0.621193	62.1193		543.4	0.621773	62.1773			9.949	0.397021	39.7021			166.7	0.404492	40.4492
	13.245	0.621504	62.1504		543.8	0.622084	62.2084			9.949	0.397219	39.7219			166.7	0.404694	40.4694
[truncated: 3,035 more rows]
