# Supplementary material for: Distinct but overlapping roles of LRRTM1 and LRRTM2 in developing and mature hippocampal circuits
Source: eLife. 2022 Jun 6;11:e64742. doi: 10.7554/eLife.64742 (PMC9170246; doi:10.7554/eLife.64742)
Supplement: Figure 3—source data 2. [file elife-64742-fig3-data2.xlsx]

## Sheet: DG DKO MEPSC
Frequency	Control	DKO		Amplitude	Control	DKO
	0.33989	1.09103			8.97478	6.0189
	0.444611	0.849714			9.30484	9.00359
	0.569036	0.565738			9.10453	8.66601
	0.638297	0.967572			7.54873	8.09456
	0.639405	0.551868			7.34296	7.70548
	0.316951	1.7693			7.49768	8.78207
	0.38777	1.05439			10.1573	8.00929
	0.762111	1.42706			6.24246	8.61203
	0.410137	2.13097			9.23691	8.82755
	0.425922	1.67808			9.41403	9.52531
		1.52787			6.95844	8.99055
		1.66098				9.52763
		1.1817				9.58148
		1.6708				8.60798
		1.05061				9.95638

## Sheet: Cumulative
Frequency						Control																			DKO								Amplitude								Control
	50	0	0	0	0	0	0	0	0	0	0	0					0	0	0	0	0	0	0	0	0	0	0	0	0	0	0			4	0	0	0	0	0	0	0	0	0	0	0
	100	0.150106	0.056818	0.066667	0.091463	0.114583	0.089888	0.222222	0.074468	0.116071	0.05	0.037383					0.102484	0.088	0.056962	0.116197	0.190476	0.144578	0.105263	0.104677	0.153226	0.148893	0.150327	0.14557	0.090411	0.140845	0.12253			5	0	0	0	0.077348	0.047847	0.025641	0.010638	0.152542	0.008547	0.007937	0.030769
	150	0.224101	0.056818	0.075	0.128049	0.161458	0.123596	0.236111	0.085106	0.169643	0.08	0.093458					0.15528	0.108	0.06962	0.176056	0.253968	0.222892	0.157895	0.187082	0.25	0.235412	0.200436	0.2173	0.167123	0.221328	0.189723			6	0.045738	0.017391	0.007246	0.337017	0.244019	0.14359	0.042553	0.542373	0.102564	0.02381	0.330769
	200	0.302326	0.056818	0.1	0.152439	0.182292	0.151685	0.263889	0.106383	0.223214	0.1	0.149533					0.214286	0.152	0.088608	0.225352	0.285714	0.279116	0.210526	0.229399	0.350806	0.301811	0.244009	0.291139	0.210959	0.297787	0.237154			7	0.259875	0.113043	0.072464	0.563536	0.511962	0.451282	0.180851	0.805085	0.196581	0.134921	0.6
	250	0.378436	0.068182	0.108333	0.195122	0.208333	0.174157	0.305556	0.117021	0.241071	0.1	0.158879					0.257764	0.208	0.132911	0.264085	0.31746	0.335341	0.251462	0.285078	0.427419	0.362173	0.302832	0.364979	0.257534	0.350101	0.280632			8	0.45738	0.243478	0.246377	0.723757	0.770335	0.753846	0.382979	0.889831	0.299145	0.34127	0.784615
	300	0.418605	0.113636	0.125	0.213415	0.239583	0.207865	0.361111	0.138298	0.25	0.13	0.168224					0.295031	0.256	0.177215	0.306338	0.31746	0.389558	0.312865	0.345212	0.502016	0.418511	0.368192	0.400844	0.30137	0.382294	0.3083			9	0.64657	0.547826	0.572464	0.812155	0.866029	0.830769	0.489362	0.932203	0.461538	0.547619	0.884615
	350	0.471459	0.136364	0.133333	0.231707	0.270833	0.241573	0.388889	0.148936	0.276786	0.16	0.186916					0.347826	0.3	0.202532	0.355634	0.31746	0.437751	0.362573	0.378619	0.5625	0.464789	0.409586	0.455696	0.339726	0.426559	0.335968			10	0.754678	0.704348	0.746377	0.845304	0.899522	0.897436	0.531915	0.974576	0.65812	0.68254	0.946154
	400	0.494715	0.147727	0.141667	0.262195	0.296875	0.258427	0.388889	0.180851	0.294643	0.18	0.205607					0.400621	0.316	0.227848	0.390845	0.349206	0.495984	0.394737	0.416481	0.602823	0.515091	0.444444	0.493671	0.380822	0.470825	0.367589			11	0.823285	0.8	0.898551	0.889503	0.937799	0.94359	0.638298	0.991525	0.794872	0.801587	0.953846
	450	0.536998	0.159091	0.158333	0.268293	0.307292	0.275281	0.402778	0.212766	0.303571	0.21	0.242991					0.437888	0.332	0.246835	0.433099	0.380952	0.538153	0.421053	0.474388	0.635081	0.555332	0.477124	0.525316	0.410959	0.519115	0.399209			12	0.879418	0.886957	0.956522	0.917127	0.952153	0.974359	0.680851	0.991525	0.880342	0.873016	0.984615
	500	0.581395	0.159091	0.191667	0.310976	0.322917	0.308989	0.416667	0.244681	0.348214	0.21	0.280374					0.459627	0.372	0.291139	0.447183	0.412698	0.584337	0.45614	0.514477	0.677419	0.587525	0.503268	0.548523	0.457534	0.54326	0.434783			13	0.923077	0.965217	0.971014	0.944751	0.966507	0.989744	0.744681	1	0.931624	0.904762	1
	550	0.632135	0.159091	0.216667	0.341463	0.328125	0.331461	0.416667	0.255319	0.366071	0.22	0.308411					0.5	0.396	0.322785	0.471831	0.444444	0.63253	0.479532	0.54343	0.703629	0.619718	0.54902	0.586498	0.493151	0.575453	0.478261			14	0.956341	0.973913	0.971014	0.955801	0.980861	0.989744	0.851064	1	0.965812	0.928571	1
	600	0.659619	0.181818	0.233333	0.390244	0.354167	0.348315	0.416667	0.255319	0.383929	0.25	0.345794					0.524845	0.416	0.348101	0.485915	0.460317	0.656627	0.517544	0.563474	0.727823	0.651911	0.575163	0.618143	0.520548	0.597586	0.513834			15	0.960499	0.973913	0.978261	0.961326	0.985646	0.994872	0.893617	1	0.982906	0.960317	1
	650	0.682875	0.204545	0.233333	0.402439	0.369792	0.376404	0.430556	0.265957	0.401786	0.28	0.373832					0.546584	0.44	0.35443	0.524648	0.47619	0.688755	0.540936	0.608018	0.743952	0.67002	0.614379	0.654008	0.558904	0.637827	0.541502			16	0.970894	0.991304	0.985507	0.977901	0.990431	0.994872	0.925532	1	0.982906	0.968254	1
	700	0.72093	0.215909	0.258333	0.408537	0.369792	0.404494	0.458333	0.297872	0.4375	0.31	0.373832					0.574534	0.464	0.367089	0.545775	0.47619	0.720884	0.55848	0.636971	0.770161	0.700201	0.62963	0.670886	0.578082	0.655936	0.565217			17	0.975052	0.991304	0.985507	0.977901	0.995215	0.994872	0.957447	1	0.991453	0.968254	1
	750	0.737844	0.227273	0.275	0.426829	0.390625	0.41573	0.5	0.329787	0.455357	0.33	0.373832					0.596273	0.488	0.398734	0.570423	0.47619	0.75502	0.578947	0.657016	0.788306	0.72837	0.662309	0.694093	0.610959	0.686117	0.588933			18	0.981289	0.991304	0.992754	0.994475	0.995215	0.994872	0.978723	1	1	0.97619	1
	800	0.756871	0.25	0.283333	0.439024	0.395833	0.426966	0.5	0.340426	0.464286	0.35	0.411215					0.602484	0.512	0.436709	0.59507	0.492063	0.767068	0.599415	0.681514	0.808468	0.760563	0.684096	0.71097	0.632877	0.706237	0.612648			19	0.987526	0.991304	1	0.994475	1	0.994872	1	1	1	0.984127	1
	850	0.784355	0.272727	0.3	0.469512	0.411458	0.449438	0.513889	0.37234	0.464286	0.36	0.411215					0.627329	0.548	0.462025	0.602113	0.507937	0.787149	0.625731	0.706013	0.83871	0.780684	0.718954	0.727848	0.652055	0.734406	0.644269			20	0.989605	0.991304	1	0.994475	1	1	1	1	1	0.984127	1
	900	0.805497	0.295455	0.3	0.493902	0.432292	0.477528	0.527778	0.414894	0.482143	0.41	0.420561					0.642857	0.572	0.474684	0.619718	0.52381	0.807229	0.643275	0.719376	0.854839	0.794769	0.734205	0.751055	0.676712	0.744467	0.652174			21	0.989605	0.991304	1	0.994475	1	1	1	1	1	1	1
	950	0.828753	0.295455	0.325	0.512195	0.447917	0.488764	0.555556	0.414894	0.508929	0.43	0.448598					0.667702	0.612	0.481013	0.644366	0.52381	0.815261	0.666667	0.743875	0.858871	0.802817	0.75817	0.761603	0.70137	0.762575	0.675889			22	0.989605	1	1	1	1	1	1	1	1	1	1
	1000	0.856237	0.306818	0.358333	0.518293	0.447917	0.494382	0.569444	0.446809	0.535714	0.45	0.457944					0.686335	0.628	0.493671	0.658451	0.555556	0.825301	0.690058	0.755011	0.870968	0.816901	0.77342	0.78481	0.728767	0.804829	0.683794			23	0.989605	1	1	1	1	1	1	1	1	1	1
	1050	0.868922	0.340909	0.366667	0.52439	0.46875	0.516854	0.597222	0.468085	0.553571	0.47	0.46729					0.695652	0.644	0.5	0.683099	0.555556	0.841365	0.710526	0.768374	0.879032	0.830986	0.788671	0.808017	0.747945	0.828974	0.6917			24	0.989605	1	1	1	1	1	1	1	1	1	1
	1100	0.87315	0.363636	0.375	0.542683	0.505208	0.561798	0.611111	0.5	0.571429	0.48	0.46729					0.698758	0.668	0.518987	0.704225	0.587302	0.853414	0.722222	0.783964	0.883065	0.83501	0.803922	0.824895	0.764384	0.853119	0.703557			25	0.991684	1	1	1	1	1	1	1	1	1	1
	1150	0.879493	0.397727	0.383333	0.554878	0.53125	0.573034	0.625	0.510638	0.589286	0.5	0.495327					0.704969	0.68	0.531646	0.714789	0.587302	0.861446	0.739766	0.7951	0.905242	0.857143	0.814815	0.837553	0.775342	0.865191	0.727273			26	0.993763	1	1	1	1	1	1	1	1	1	1
	1200	0.89852	0.420455	0.391667	0.567073	0.541667	0.58427	0.652778	0.531915	0.607143	0.52	0.523364					0.732919	0.684	0.550633	0.739437	0.619048	0.87751	0.75731	0.812918	0.907258	0.869215	0.823529	0.85865	0.786301	0.881288	0.750988			27	0.993763	1	1	1	1	1	1	1	1	1	1
	1250	0.909091	0.431818	0.4	0.579268	0.557292	0.595506	0.652778	0.553191	0.616071	0.53	0.551402					0.745342	0.696	0.556962	0.753521	0.634921	0.88755	0.769006	0.824053	0.919355	0.873239	0.845316	0.867089	0.791781	0.887324	0.758893			28	0.993763	1	1	1	1	1	1	1	1	1	1
	1300	0.921776	0.454545	0.416667	0.591463	0.567708	0.623596	0.666667	0.574468	0.633929	0.54	0.570093					0.763975	0.712	0.56962	0.771127	0.666667	0.901606	0.777778	0.839644	0.923387	0.879276	0.862745	0.871308	0.808219	0.895372	0.766798			29	0.995842	1	1	1	1	1	1	1	1	1	1
	1350	0.932347	0.477273	0.416667	0.591463	0.588542	0.646067	0.680556	0.574468	0.642857	0.55	0.598131					0.773292	0.716	0.588608	0.78169	0.698413	0.913655	0.777778	0.853007	0.933468	0.889336	0.875817	0.879747	0.827397	0.913481	0.778656			30	0.997921	1	1	1	1	1	1	1	1	1	1
	1400	0.940803	0.477273	0.425	0.591463	0.614583	0.662921	0.694444	0.574468	0.651786	0.56	0.635514					0.779503	0.724	0.588608	0.785211	0.698413	0.919679	0.789474	0.86637	0.949597	0.907445	0.880174	0.890295	0.841096	0.929577	0.782609			31	0.997921	1	1	1	1	1	1	1	1	1	1
	1450	0.94926	0.5	0.458333	0.597561	0.635417	0.668539	0.694444	0.585106	0.669643	0.59	0.635514					0.782609	0.728	0.588608	0.788732	0.714286	0.927711	0.798246	0.873051	0.953629	0.909457	0.882353	0.892405	0.846575	0.937626	0.786561			32	0.997921	1	1	1	1	1	1	1	1	1	1
	1500	0.953488	0.5	0.475	0.621951	0.640625	0.674157	0.694444	0.617021	0.669643	0.59	0.64486					0.785714	0.736	0.601266	0.799296	0.746032	0.939759	0.804094	0.879733	0.959677	0.913481	0.891068	0.900844	0.860274	0.943662	0.794466			33	0.997921	1	1	1	1	1	1	1	1	1	1
	1550	0.955603	0.511364	0.516667	0.640244	0.640625	0.691011	0.694444	0.62766	0.696429	0.6	0.654206					0.798137	0.744	0.607595	0.809859	0.746032	0.943775	0.818713	0.884187	0.961694	0.923541	0.897603	0.913502	0.871233	0.947686	0.798419			34	0.997921	1	1	1	1	1	1	1	1	1	1
	1600	0.959831	0.534091	0.516667	0.646341	0.651042	0.691011	0.708333	0.638298	0.696429	0.62	0.663551					0.813665	0.744	0.632911	0.820423	0.746032	0.949799	0.824561	0.89755	0.961694	0.925553	0.910675	0.92616	0.879452	0.949698	0.806324			35	0.997921	1	1	1	1	1	1	1	1	1	1
	1650	0.964059	0.556818	0.516667	0.646341	0.671875	0.702247	0.722222	0.659574	0.714286	0.62	0.672897					0.822981	0.752	0.64557	0.823944	0.761905	0.949799	0.830409	0.904232	0.965726	0.933602	0.921569	0.92827	0.887671	0.953722	0.822134			36	1	1	1	1	1	1	1	1	1	1	1
	1700	0.966173	0.556818	0.525	0.658537	0.703125	0.719101	0.722222	0.659574	0.723214	0.62	0.691589					0.835404	0.772	0.64557	0.830986	0.777778	0.953815	0.833333	0.91314	0.969758	0.935614	0.923747	0.932489	0.90137	0.959759	0.833992			37	1	1	1	1	1	1	1	1	1	1	1
	1750	0.968288	0.568182	0.541667	0.670732	0.729167	0.735955	0.736111	0.680851	0.732143	0.63	0.700935					0.84472	0.792	0.658228	0.841549	0.777778	0.955823	0.847953	0.922049	0.97379	0.939638	0.936819	0.938819	0.909589	0.961771	0.84585			38	1	1	1	1	1	1	1	1	1	1	1
	1800	0.970402	0.579545	0.55	0.695122	0.739583	0.752809	0.736111	0.691489	0.732143	0.63	0.700935					0.857143	0.804	0.664557	0.855634	0.777778	0.957831	0.859649	0.935412	0.975806	0.94165	0.941176	0.938819	0.915068	0.969819	0.865613			39	1	1	1	1	1	1	1	1	1	1	1
	1850	0.972516	0.579545	0.575	0.695122	0.744792	0.752809	0.736111	0.691489	0.741071	0.64	0.700935					0.863354	0.824	0.677215	0.855634	0.777778	0.959839	0.865497	0.937639	0.975806	0.947686	0.947712	0.951477	0.917808	0.975855	0.865613			40	1	1	1	1	1	1	1	1	1	1	1
	1900	0.97463	0.579545	0.583333	0.707317	0.760417	0.758427	0.75	0.691489	0.767857	0.64	0.71028					0.869565	0.832	0.683544	0.869718	0.777778	0.967871	0.868421	0.939866	0.979839	0.949698	0.95207	0.953586	0.917808	0.975855	0.873518			41	1	1	1	1	1	1	1	1	1	1	1
	1950	0.978858	0.590909	0.6	0.707317	0.78125	0.758427	0.763889	0.691489	0.776786	0.66	0.719626					0.878882	0.84	0.702532	0.873239	0.793651	0.975904	0.868421	0.944321	0.983871	0.953722	0.956427	0.953586	0.917808	0.979879	0.873518			42	1	1	1	1	1	1	1	1	1	1	1
	2000	0.978858	0.590909	0.608333	0.707317	0.8125	0.764045	0.763889	0.691489	0.785714	0.68	0.738318					0.885093	0.852	0.71519	0.873239	0.809524	0.977912	0.874269	0.948775	0.987903	0.957746	0.960784	0.957806	0.923288	0.981891	0.873518			43	1	1	1	1	1	1	1	1	1	1	1
	2050	0.980973	0.602273	0.633333	0.713415	0.828125	0.775281	0.777778	0.712766	0.785714	0.71	0.738318					0.888199	0.852	0.71519	0.887324	0.809524	0.981928	0.877193	0.957684	0.987903	0.963783	0.96732	0.962025	0.926027	0.983903	0.881423			44	1	1	1	1	1	1	1	1	1	1	1
	2100	0.987315	0.602273	0.633333	0.719512	0.838542	0.780899	0.777778	0.712766	0.785714	0.72	0.738318					0.89441	0.856	0.727848	0.887324	0.809524	0.983936	0.883041	0.957684	0.989919	0.967807	0.96732	0.964135	0.931507	0.985915	0.881423			45	1	1	1	1	1	1	1	1	1	1	1
	2150	0.987315	0.613636	0.658333	0.731707	0.854167	0.797753	0.805556	0.723404	0.785714	0.73	0.766355					0.906832	0.872	0.734177	0.894366	0.825397	0.983936	0.883041	0.957684	0.989919	0.969819	0.969499	0.966245	0.936986	0.987928	0.881423			46	1	1	1	1	1	1	1	1	1	1	1
	2200	0.989429	0.625	0.675	0.756098	0.864583	0.808989	0.819444	0.755319	0.785714	0.73	0.775701					0.909938	0.872	0.746835	0.897887	0.825397	0.985944	0.888889	0.957684	0.989919	0.971831	0.969499	0.970464	0.939726	0.987928	0.885375			47	1	1	1	1	1	1	1	1	1	1	1
	2250	0.989429	0.636364	0.683333	0.756098	0.869792	0.814607	0.833333	0.755319	0.785714	0.73	0.775701					0.916149	0.876	0.759494	0.897887	0.84127	0.985944	0.897661	0.966592	0.991935	0.971831	0.969499	0.970464	0.939726	0.987928	0.893281			48	1	1	1	1	1	1	1	1	1	1	1
	2300	0.991543	0.636364	0.683333	0.756098	0.869792	0.825843	0.875	0.776596	0.8125	0.74	0.775701					0.925466	0.876	0.772152	0.901408	0.84127	0.985944	0.897661	0.96882	0.991935	0.977867	0.971678	0.974684	0.942466	0.98994	0.897233			49	1	1	1	1	1	1	1	1	1	1	1
	2350	0.991543	0.647727	0.691667	0.768293	0.869792	0.825843	0.875	0.776596	0.839286	0.75	0.785047					0.928571	0.88	0.791139	0.908451	0.84127	0.985944	0.909357	0.977728	0.991935	0.979879	0.976035	0.976793	0.945205	0.991952	0.909091			50	1	1	1	1	1	1	1	1	1	1	1
	2400	0.993658	0.659091	0.7	0.768293	0.869792	0.831461	0.875	0.776596	0.848214	0.77	0.794393					0.934783	0.884	0.797468	0.911972	0.84127	0.987952	0.915205	0.979955	0.991935	0.981891	0.976035	0.978903	0.947945	0.991952	0.909091			51	1	1	1	1	1	1	1	1	1	1	1
	2450	0.993658	0.670455	0.708333	0.77439	0.875	0.837079	0.875	0.776596	0.857143	0.78	0.803738					0.937888	0.888	0.822785	0.911972	0.84127	0.987952	0.923977	0.979955	0.991935	0.981891	0.982571	0.981013	0.950685	0.991952	0.909091			52	1	1	1	1	1	1	1	1	1	1	1
	2500	0.993658	0.681818	0.725	0.780488	0.880208	0.853933	0.875	0.787234	0.866071	0.81	0.813084					0.937888	0.892	0.835443	0.911972	0.873016	0.991968	0.929825	0.979955	0.993952	0.983903	0.984749	0.983122	0.950685	0.993964	0.920949			53	1	1	1	1	1	1	1	1	1	1	1
	2550	0.993658	0.681818	0.733333	0.79878	0.885417	0.853933	0.875	0.787234	0.875	0.82	0.813084					0.940994	0.892	0.841772	0.911972	0.873016	0.991968	0.932749	0.979955	0.997984	0.987928	0.991285	0.985232	0.953425	0.993964	0.924901			54	1	1	1	1	1	1	1	1	1	1	1
	2600	0.993658	0.704545	0.733333	0.817073	0.885417	0.865169	0.875	0.797872	0.875	0.82	0.831776					0.944099	0.9	0.841772	0.911972	0.873016	0.991968	0.935673	0.979955	0.997984	0.987928	0.991285	0.987342	0.961644	0.993964	0.928854			55	1	1	1	1	1	1	1	1	1	1	1
	2650	0.993658	0.715909	0.75	0.817073	0.885417	0.870787	0.888889	0.797872	0.892857	0.83	0.831776					0.944099	0.904	0.841772	0.911972	0.873016	0.993976	0.935673	0.98441	1	0.987928	0.991285	0.987342	0.961644	0.993964	0.932806			56	1	1	1	1	1	1	1	1	1	1	1
	2700	0.995772	0.727273	0.758333	0.829268	0.885417	0.876404	0.902778	0.797872	0.892857	0.83	0.841121					0.950311	0.912	0.867089	0.919014	0.873016	0.993976	0.935673	0.98441	1	0.98994	0.991285	0.987342	0.961644	0.993964	0.932806			57	1	1	1	1	1	1	1	1	1	1	1
	2750	0.995772	0.738636	0.758333	0.847561	0.885417	0.882022	0.902778	0.808511	0.901786	0.83	0.841121					0.956522	0.916	0.873418	0.922535	0.873016	0.995984	0.938596	0.98441	1	0.98994	0.993464	0.989451	0.964384	0.993964	0.940711			58	1	1	1	1	1	1	1	1	1	1	1
	2800	0.995772	0.75	0.766667	0.853659	0.890625	0.88764	0.902778	0.808511	0.910714	0.84	0.850467					0.956522	0.916	0.873418	0.926056	0.873016	0.995984	0.94152	0.98441	1	0.98994	0.993464	0.989451	0.969863	0.993964	0.944664			59	1	1	1	1	1	1	1	1	1	1	1
	2850	0.995772	0.75	0.775	0.865854	0.890625	0.88764	0.902778	0.819149	0.919643	0.86	0.869159					0.965839	0.916	0.873418	0.926056	0.904762	0.995984	0.94152	0.98441	1	0.98994	0.993464	0.991561	0.969863	0.993964	0.948617			60	1	1	1	1	1	1	1	1	1	1	1
	2900	0.995772	0.772727	0.783333	0.884146	0.890625	0.88764	0.902778	0.819149	0.928571	0.86	0.878505					0.965839	0.92	0.873418	0.929577	0.904762	0.995984	0.94152	0.98441	1	0.991952	0.993464	0.993671	0.969863	0.993964	0.952569			61	1	1	1	1	1	1	1	1	1	1	1
	2950	0.995772	0.772727	0.791667	0.890244	0.895833	0.893258	0.916667	0.840426	0.928571	0.86	0.897196					0.965839	0.924	0.886076	0.929577	0.904762	0.995984	0.947368	0.98441	1	0.991952	0.993464	0.993671	0.969863	0.993964	0.952569			62	1	1	1	1	1	1	1	1	1	1	1
	3000	0.995772	0.784091	0.8	0.890244	0.895833	0.91573	0.916667	0.861702	0.928571	0.87	0.897196					0.97205	0.928	0.886076	0.929577	0.920635	0.995984	0.947368	0.986637	1	0.991952	0.993464	0.993671	0.969863	0.995976	0.952569			63	1	1	1	1	1	1	1	1	1	1	1
	3050	0.995772	0.784091	0.8	0.896341	0.90625	0.91573	0.916667	0.861702	0.928571	0.89	0.897196					0.97205	0.932	0.886076	0.933099	0.936508	0.995984	0.947368	0.986637	1	0.991952	0.993464	0.993671	0.969863	0.995976	0.956522			64	1	1	1	1	1	1	1	1	1	1	1
	3100	0.997886	0.784091	0.8	0.902439	0.90625	0.91573	0.916667	0.87234	0.928571	0.9	0.906542					0.97205	0.936	0.905063	0.93662	0.936508	0.995984	0.950292	0.986637	1	0.993964	0.997821	0.993671	0.972603	0.995976	0.956522			65	1	1	1	1	1	1	1	1	1	1	1
	3150	0.997886	0.806818	0.816667	0.908537	0.90625	0.91573	0.916667	0.882979	0.928571	0.92	0.915888					0.978261	0.936	0.911392	0.93662	0.936508	0.995984	0.950292	0.986637	1	0.993964	0.997821	0.993671	0.972603	0.995976	0.956522			66	1	1	1	1	1	1	1	1	1	1	1
	3200	0.997886	0.818182	0.833333	0.908537	0.90625	0.921348	0.916667	0.882979	0.928571	0.93	0.915888					0.978261	0.936	0.911392	0.940141	0.936508	0.995984	0.953216	0.986637	1	0.993964	0.997821	0.995781	0.980822	0.995976	0.956522			67	1	1	1	1	1	1	1	1	1	1	1
	3250	0.997886	0.818182	0.841667	0.908537	0.90625	0.921348	0.930556	0.882979	0.946429	0.93	0.925234					0.978261	0.936	0.917722	0.940141	0.936508	0.995984	0.95614	0.986637	1	0.993964	1	0.99789	0.983562	0.995976	0.960474			68	1	1	1	1	1	1	1	1	1	1	1
	3300	0.997886	0.818182	0.841667	0.908537	0.90625	0.921348	0.930556	0.882979	0.946429	0.93	0.925234					0.981366	0.936	0.924051	0.940141	0.936508	0.995984	0.95614	0.986637	1	0.993964	1	0.99789	0.983562	0.995976	0.960474			69	1	1	1	1	1	1	1	1	1	1	1
	3350	0.997886	0.818182	0.841667	0.914634	0.90625	0.926966	0.930556	0.893617	0.946429	0.93	0.934579					0.981366	0.94	0.93038	0.947183	0.936508	0.995984	0.95614	0.986637	1	0.995976	1	1	0.986301	0.995976	0.964427			70	1	1	1	1	1	1	1	1	1	1	1
	3400	1	0.840909	0.858333	0.914634	0.90625	0.926966	0.930556	0.893617	0.946429	0.93	0.934579					0.981366	0.94	0.943038	0.947183	0.936508	0.995984	0.95614	0.986637	1	0.995976	1	1	0.986301	0.995976	0.964427			71	1	1	1	1	1	1	1	1	1	1	1
	3450	1	0.852273	0.858333	0.914634	0.90625	0.926966	0.930556	0.904255	0.955357	0.93	0.934579					0.981366	0.944	0.943038	0.950704	0.936508	0.995984	0.95614	0.986637	1	0.995976	1	1	0.989041	0.995976	0.964427			72	1	1	1	1	1	1	1	1	1	1	1
	3500	1	0.863636	0.858333	0.920732	0.90625	0.932584	0.930556	0.904255	0.973214	0.94	0.934579					0.984472	0.948	0.949367	0.954225	0.936508	0.995984	0.961988	0.986637	1	0.995976	1	1	0.989041	0.995976	0.964427			73	1	1	1	1	1	1	1	1	1	1	1
	3550	1	0.863636	0.858333	0.926829	0.916667	0.932584	0.930556	0.904255	0.973214	0.94	0.934579					0.984472	0.952	0.949367	0.954225	0.936508	0.995984	0.961988	0.988864	1	0.995976	1	1	0.989041	0.995976	0.968379			74	1	1	1	1	1	1	1	1	1	1	1
	3600	1	0.875	0.875	0.926829	0.916667	0.932584	0.944444	0.914894	0.973214	0.95	0.934579					0.984472	0.96	0.949367	0.957746	0.936508	0.995984	0.961988	0.991091	1	0.995976	1	1	0.989041	0.995976	0.968379			75	1	1	1	1	1	1	1	1	1	1	1
	3650	1	0.886364	0.875	0.926829	0.921875	0.932584	0.958333	0.925532	0.973214	0.95	0.934579					0.984472	0.964	0.949367	0.964789	0.936508	0.995984	0.961988	0.993318	1	0.995976	1	1	0.989041	0.995976	0.968379			76	1	1	1	1	1	1	1	1	1	1	1
	3700	1	0.886364	0.875	0.939024	0.921875	0.938202	0.958333	0.93617	0.973214	0.95	0.934579					0.990683	0.964	0.949367	0.971831	0.936508	0.995984	0.967836	0.995546	1	0.997988	1	1	0.989041	0.997988	0.972332			77	1	1	1	1	1	1	1	1	1	1	1
	3750	1	0.886364	0.875	0.945122	0.9375	0.949438	0.958333	0.93617	0.982143	0.95	0.934579					0.990683	0.964	0.949367	0.971831	0.936508	0.995984	0.97076	0.995546	1	0.997988	1	1	0.989041	0.997988	0.972332			78	1	1	1	1	1	1	1	1	1	1	1
	3800	1	0.909091	0.891667	0.945122	0.942708	0.949438	0.958333	0.93617	0.982143	0.95	0.934579					0.990683	0.964	0.955696	0.971831	0.936508	0.995984	0.97076	0.995546	1	0.997988	1	1	0.991781	1	0.980237			79	1	1	1	1	1	1	1	1	1	1	1
	3850	1	0.931818	0.891667	0.95122	0.947917	0.960674	0.958333	0.93617	0.982143	0.96	0.934579					0.993789	0.976	0.962025	0.971831	0.952381	0.995984	0.97076	0.995546	1	0.997988	1	1	0.991781	1	0.98419			80	1	1	1	1	1	1	1	1	1	1	1
	3900	1	0.931818	0.908333	0.95122	0.958333	0.960674	0.958333	0.93617	0.982143	0.97	0.934579					0.993789	0.98	0.962025	0.971831	0.968254	0.995984	0.97076	0.995546	1	1	1	1	0.994521	1	0.98419			81	1	1	1	1	1	1	1	1	1	1	1
	3950	1	0.931818	0.916667	0.95122	0.958333	0.960674	0.958333	0.957447	0.982143	0.97	0.934579					0.996894	0.98	0.962025	0.971831	0.968254	0.995984	0.973684	0.997773	1	1	1	1	0.99726	1	0.988142			82	1	1	1	1	1	1	1	1	1	1	1
	4000	1	0.931818	0.933333	0.95122	0.973958	0.966292	0.958333	0.957447	0.982143	0.97	0.934579					0.996894	0.984	0.962025	0.975352	0.984127	0.995984	0.979532	1	1	1	1	1	0.99726	1	0.992095			83	1	1	1	1	1	1	1	1	1	1	1
	4050	1	0.943182	0.933333	0.957317	0.979167	0.966292	0.958333	0.957447	0.982143	0.97	0.934579					0.996894	0.984	0.962025	0.978873	0.984127	0.997992	0.979532	1	1	1	1	1	0.99726	1	0.992095			84	1	1	1	1	1	1	1	1	1	1	1
	4100	1	0.943182	0.933333	0.963415	0.979167	0.97191	0.958333	0.957447	0.982143	0.97	0.953271					0.996894	0.988	0.962025	0.985915	0.984127	0.997992	0.98538	1	1	1	1	1	0.99726	1	0.992095			85	1	1	1	1	1	1	1	1	1	1	1
	4150	1	0.943182	0.95	0.963415	0.984375	0.977528	0.972222	0.957447	0.982143	0.97	0.962617					0.996894	0.988	0.962025	0.985915	0.984127	0.997992	0.988304	1	1	1	1	1	0.99726	1	0.992095			86	1	1	1	1	1	1	1	1	1	1	1
	4200	1	0.954545	0.958333	0.969512	0.984375	0.983146	0.972222	0.957447	0.982143	0.98	0.981308					1	0.988	0.962025	0.989437	0.984127	0.997992	0.991228	1	1	1	1	1	0.99726	1	0.996047			87	1	1	1	1	1	1	1	1	1	1	1
	4250	1	0.954545	0.958333	0.969512	0.989583	0.983146	0.972222	0.968085	0.991071	0.98	0.990654					1	0.988	0.974684	0.996479	0.984127	0.997992	0.994152	1	1	1	1	1	0.99726	1	1			88	1	1	1	1	1	1	1	1	1	1	1
	4300	1	0.965909	0.966667	0.969512	0.994792	0.983146	0.972222	0.968085	1	0.99	0.990654					1	0.988	0.974684	0.996479	0.984127	0.997992	0.994152	1	1	1	1	1	0.99726	1	1			89	1	1	1	1	1	1	1	1	1	1	1
	4350	1	0.965909	0.975	0.981707	0.994792	0.994382	0.986111	0.989362	1	0.99	0.990654					1	0.988	0.981013	0.996479	0.984127	0.997992	0.994152	1	1	1	1	1	1	1	1			90	1	1	1	1	1	1	1	1	1	1	1
	4400	1	0.965909	0.975	0.987805	0.994792	0.994382	0.986111	0.989362	1	0.99	1					1	0.992	0.981013	0.996479	0.984127	1	0.994152	1	1	1	1	1	1	1	1			91	1	1	1	1	1	1	1	1	1	1	1
	4450	1	0.977273	0.975	0.987805	0.994792	0.994382	1	0.989362	1	0.99	1					1	0.992	0.987342	1	0.984127	1	0.994152	1	1	1	1	1	1	1	1			92	1	1	1	1	1	1	1	1	1	1	1
	4500	1	0.988636	0.991667	0.993902	1	1	1	0.989362	1	0.99	1					1	0.996	0.987342	1	1	1	1	1	1	1	1	1	1	1	1			93	1	1	1	1	1	1	1	1	1	1	1
	4550	1	1	1	0.993902	1	1	1	0.989362	1	1	1					1	0.996	0.993671	1	1	1	1	1	1	1	1	1	1	1	1			94	1	1	1	1	1	1	1	1	1	1	1
	4600	1	1	1	0.993902	1	1	1	0.989362	1	1	1					1	0.996	0.993671	1	1	1	1	1	1	1	1	1	1	1	1			95	1	1	1	1	1	1	1	1	1	1	1
	4650	1	1	1	1	1	1	1	1	1	1	1					1	1	1	1	1	1	1	1	1	1	1	1	1	1	1			96	1	1	1	1	1	1	1	1	1	1	1
																																		97	1	1	1	1	1	1	1	1	1	1	1
																																		98	1	1	1	1	1	1	1	1	1	1	1
																																		99	1	1	1	1	1	1	1	1	1	1	1
																																		100	1	1	1	1	1	1	1	1	1	1	1
[truncated: 15 more columns]
