# Supplementary material for: Distinct but overlapping roles of LRRTM1 and LRRTM2 in developing and mature hippocampal circuits
Source: eLife. 2022 Jun 6;11:e64742. doi: 10.7554/eLife.64742 (PMC9170246; doi:10.7554/eLife.64742)
Supplement: Figure 4—figure supplement 1—source data 1. [file elife-64742-fig4-figsupp1-data1.xlsx]

## Sheet: Sheet1
ISI						Control														DKO
20	1.84562	2.00986	1.63784	1.91273	1.41579	1.65414	1.40494	1.71986	1.44699	1.34754	1.49436	1.41643			1.56717	1.79813	1.37368	1.51468	1.57756	1.68235	1.925	1.65575	1.52644	1.63398	1.65012	1.71195
50	1.76427	1.86282	1.64708	1.82578	1.47047	1.62702	1.4654	1.57134	1.41337	1.4952	1.47812	1.42684			1.68399	1.8364	1.56167	1.57417	1.8306	1.6318	2.01762	1.83326	1.53227	1.67173	1.61183	1.66843
100	1.56882	1.68029	1.59285	1.61894	1.3941	1.55516	1.48321	1.64748	1.34936	1.37065	1.41386	1.3605			1.58396	1.6851	1.55886	1.49468	1.7394	1.52405	1.84411	1.83326	1.55563	1.70223	1.51943	1.63634
200	1.28381	1.48524	1.43036	1.43823	1.23955	1.42977	1.31002	1.34071	1.21707	1.34484	1.31734	1.21575			1.43066	1.45244	1.30713	1.34945	1.54404	1.26642	1.49579	1.68316	1.27429	1.50545	1.41813	1.49089
500	1.16069	1.40817	1.09407	1.21645	1.11478	1.19371	1.12566	1.17182	1.07317	1.05464	1.10497	1.06986			1.26423	1.17389	1.21071	1.17918	1.19463	1.08902	1.20521	1.36592	1.1497	1.19062	1.21875	1.2821
