# Supplementary material for: Distinct but overlapping roles of LRRTM1 and LRRTM2 in developing and mature hippocampal circuits
Source: eLife. 2022 Jun 6;11:e64742. doi: 10.7554/eLife.64742 (PMC9170246; doi:10.7554/eLife.64742)
Supplement: Figure 4—source data 1. [file elife-64742-fig4-data1.xlsx]

## Sheet: Sheet2
DKO												WT
	216.192	242.488	184.571	285.589	184.571	182.727	200.787	223.682	185.329	261.546			210.134	208.786	296.422	139.839	179.676	176.543	197.703	190.96	195.464	212.591	219.873	193.105
	233.274	227.311	170.899	156.394	170.899	154.827	193.162	200.758	166.974	249.706			231.448	234.44	277.079	151.911	187.131	178.052	173.24	179.279	176.907	220.347	204.651	186.832
	223.665	218.134	166.074	138.513	166.074	137.125	78.0635	225.071	162.829	235.714			221.611	240.282	247.582	130.785	171.475	211.248	164.254	155.917	161.649	190.237	181.818	175.953
	211.922	222.016	160.042	125.669	160.042	124.41	78.0635	232.018	153.355	221.722			214.78	231.138	269.826	134.809	167.002	165.981	170.245	145.251	148.866	167.427	168.71	162.686
	191.637	207.898	169.291	135.743	169.291	134.383	89.6823	216.04	155.132	202.348			188.274	208.532	255.803	149.899	160.292	153.909	182.726	139.157	144.742	159.672	161.099	157.946
	175.089	195.544	131.492	119.121	131.492	117.928	93.3132	200.063	153.947	190.509			187.181	215.136	235.01	137.827	157.31	144.856	176.236	144.236	147.629	151.46	157.717	154.296
	169.751	202.25	147.175	126.677	103.746	125.407	101.301	197.979	156.908	195.89			182.262	198.373	253.868	138.833	156.564	129.767	169.745	137.125	137.732	150.091	154.757	148.965
	164.947	188.131	125.058	113.833	92.4868	112.692	111.467	168.109	143.882	175.44			182.809	175.513	240.812	135.815	142.399	141.838	160.26	140.173	136.082	150.091	150.951	146.965
	143.594	188.131	128.275	105.018	100.529	103.966	95.8548	180.613	142.697	178.669			156.576	189.991	212.766	136.821	155.073	138.82	162.257	136.618	136.495	147.354	147.146	145.827
	144.128	184.602	145.566	105.27	89.672	104.215	92.2239	150.047	135	171.135			148.105	184.149	219.536	135.815	146.872	143.347	154.269	133.57	136.082	145.985	145.455	144.309
	151.601	190.249	149.185	109.3	78.0106	108.204	106.384	154.91	137.961	173.288			153.024	172.973	195.841	135.815	147.618	140.329	158.762	132.555	137.32	148.723	149.683	144.353
	152.669	173.66	135.915	94.6927	96.5079	93.7438	116.914	151.437	142.697	167.906			147.285	140.207	177.95	124.748	161.037	125.24	164.753	142.712	141.443	146.898	153.488	148.435
	141.459	174.013	112.995	114.085	114.201	112.941	109.289	160.467	144.474	176.517			154.936	164.845	187.621	123.742	139.417	132.785	155.766	133.57	138.144	145.985	150.106	140.82
	144.128	169.777	103.746	112.825	113.799	111.695	100.575	143.101	129.079	165.753			148.925	168.909	183.269	123.742	149.109	143.347	160.26	140.681	136.082	147.354	150.529	145.271
	134.52	159.188	101.333	107.537	113.799	106.459	127.806	142.406	132.039	160.372			138.814	165.607	175.048	125.755	149.109	135.802	146.78	135.094	125.361	136.861	149.683	141.074
	135.053	164.13	102.138	102.752	106.963	101.722	98.3964	152.826	133.224	172.211			142.367	167.639	187.137	120.724	152.836	146.365	151.273	127.984	128.66	141.88	152.643	142.433
	129.715	160.953	105.354	107.033	116.212	105.96	95.8548	150.742	135.592	156.067			150.018	165.353	176.499	124.748	152.091	156.927	156.266	135.602	128.247	142.336	149.26	144.945
	138.256	161.306	100.931	121.136	121.439	119.922	102.753	148.658	135.592	153.914			147.012	163.829	176.015	132.797	152.836	152.401	148.278	149.314	128.66	141.88	151.374	145.07
	128.648	163.424	120.233	112.322	147.175	111.196	111.467	150.047	133.224	145.303			160.675	164.591	176.499	119.718	156.564	146.365	156.765	149.822	130.309	145.073	148.837	146.32
	144.662	164.483	120.635	105.018	125.058	103.966	95.1286	145.879	127.303	138.845			146.739	155.193	173.598	117.706	144.635	150.892	144.284	143.22	130.309	138.686	146.723	141.82
	138.256	150.364	110.582	115.847	128.275	114.687	106.747	142.406	127.303	120.548			174.884	176.529	149.903	125.755	154.327	161.454	150.275	129.507	125.361	134.124	147.569	142.304
	137.722	154.6	103.344	112.825	145.566	111.695	114.009	144.49	136.184	120.548			164.774	150.113	149.42	123.742	157.31	172.016	156.266	137.633	129.485	140.055	148.837	145.794
	129.715	157.776	97.3122	114.085	149.185	112.941	114.009	143.795	142.105	99.0215			147.012	179.831	153.772	123.742	155.073	137.311	152.272	148.299	129.485	136.405	145.877	141.058
	129.181	146.128	108.974	83.1079	135.915	82.2752	120.545	141.711	132.632	118.395			148.925	159.511	139.749	128.773	149.109	141.838	153.27	144.744	130.309	137.318	145.877	140.776
	132.384	154.247	119.026	81.345	112.995	80.5299	107.11	146.574	124.342	118.421			145.099	154.685	159.574	109.658	145.381	132.785	152.771	145.759	126.186	136.405	143.763	138.601
	133.986	138.363	129.481	68.5011	103.746	67.8147	105.658	150.047	119.605	114.276			155.483	148.081	152.805	122.736	152.091	144.856	153.769	151.854	123.711	134.124	144.609	140.717
	133.452	156.717	94.4974	78.5748	101.333	77.7874	92.2239	143.101	119.605	107.763			141	163.829	138.781	120.724	149.854	135.802	147.778	150.838	120.825	135.493	147.146	139.061
	135.587	146.128	135.513	86.13	102.138	85.267	117.64	141.017	129.671	105.395			171.332	154.685	128.627	117.706	145.381	152.401	140.789	140.173	126.598	136.861	150.529	140.691
	120.107	152.129	131.894	84.3671	105.354	83.5218	117.64	137.543	126.118	103.026			149.471	154.685	128.627	119.718	135.689	161.454	131.303	131.031	120.825	135.036	148.414	135.434
	124.377	147.187	116.212	78.8266	100.931	78.0368	115.825	146.574	126.118	106.579			166.96	162.051	131.528	116.7	134.943	150.892	134.299	143.728	117.113	131.387	145.455	134.44
	116.904	147.187	123.45	86.3819	120.233	85.5163	98.3964	141.017	124.342	105.395			150.838	162.051	129.11	113.682	140.162	140.329	127.309	148.807	120.825	135.036	143.34	135.195
	125.979	147.893	129.884	76.0563	120.635	75.2943	107.11	138.238	116.053	107.171			159.582	153.161	116.538	112.676	145.381	161.454	130.305	142.204	120	133.212	145.877	137.772
	120.107	154.6	137.524	68.5011	110.582	67.8147	101.301	138.933	121.382	108.355			135.535	155.193	117.021	105.634	143.144	144.856	130.305	135.094	115.876	132.755	143.763	133.692
	118.505	141.187	127.069	85.6263	103.344	84.7684	112.194	140.322	120.789	105.295			130.617	143.255	150.87	100.604	140.162	147.874	132.801	143.728	117.113	135.949	140.381	135.847
	114.769	138.363	121.037	82.3524	97.3122	81.5272	99.8487	134.07	114.276	112.194			128.431	147.065	158.124	112.676	152.091	144.856	133.799	140.681	118.351	134.58	141.649	134.458
	115.302	151.776	126.667	77.3155	108.974	76.5408	98.3964	134.765	107.171	96.5809			130.89	157.479	136.847	113.682	141.653	153.909	132.801	138.649	116.701	133.668	138.266	134.798
	114.769	145.422	116.212	77.0637	119.026	76.2915	100.575	127.818	108.355	109.289			134.715	147.065	127.176	104.628	156.564	149.383	137.793	128.492	121.237	127.281	141.649	135.39
	130.783	130.951	92.4868	84.619	129.481	83.7711	105.658	133.375	108.355	104.932			117.5	149.351	108.801	112.676	156.564	141.838	147.279	128.492	122.887	130.018	137.844	135.328
	110.498	145.775	100.529	69.7603	94.4974	104.465	99.4856	138.933	112.5	115.098			121.053	154.431	142.166	110.664	140.162	135.802	146.281	129.507	118.351	129.106	139.535	132.308
	117.972	138.363	89.672	82.8561	135.513	98.2316	106.021	136.849	111.908	106.384			111.215	140.969	114.12	105.634	158.801	156.927	148.278	125.444	120.412	129.106	139.535	136.9
	118.505	135.186	78.0106	74.2934	131.894	111.196	108.2	128.513	117.829	107.474			118.867	147.573	114.603	109.658	146.126	135.802	147.279	121.889	126.598	129.106	139.535	132.502
	117.438	126.715	96.5079	82.6042	116.212	94.9904	96.2179	141.017	120.197	105.295			102.198	153.669	102.515	105.634	146.872	153.909	132.302	142.204	125.773	128.193	134.461	134.549
	125.445	132.716	74.2011	90.6632	103.45	118.925	109.289	109.207	107.763	96.6138			97.2793	149.605	117.021	109.658	157.31	134.294	125.811	137.125	125.361	129.562	134.461	131.195
	117.58	135.186	93.7989	69.404	109.884	81.9986	83.3132	119.902	118.421	101.735			100.558	140.715	111.219	96.5795	140.908	140.329	124.813	135.094	126.598	124.544	131.924	128.102
	95.3025	130.128	113.799	70.5158	127.524	69.4782	77.3071	124.765	112.5	106.963			103.291	141.477	124.275	119.718	149.854	140.329	131.802	119.35	124.536	126.825	131.501	129.609
	79.573	132.363	106.963	77.3155	107.069	86.7357	86.944	121.986	114.276	108.974			99.1921	140.461	115.571	116.7	149.109	143.347	139.291	125.444	127.423	130.474	131.078	132.481
	113.167	125.186	116.212	86.6337	91.037	78.703	85.3253	123.375	108.355	96.2116			122.965	145.033	108.317	101.61	143.89	146.365	143.285	126.46	127.01	129.106	131.078	131.478
	109.431	119.186	101.439	74.2934	86.6667	103.218	78.9259	127.818	100.066	101.333			115.588	150.621	103.965	113.682	140.908	150.892	149.276	122.397	124.948	127.281	133.192	132.696
	122.242	128.833	96.1058	82.3524	116.212	112.193	102.39	120.871	97.1053	124.656			100.832	148.843	110.735	112.676	150.6	146.365	144.284	122.397	124.948	128.65	130.233	132.267
	117.972	129.539	96.1058	72.7824	96.1058	107.456	94.7655	122.261	102.434	97.7143			102.471	145.541	97.6789	110.664	144.635	141.838	149.276	128.492	115.052	125	130.655	130.073
	113.701	126.362	102.54	72.5305	96.1058	114.188	96.5809	118.093	108.355	85.2487			96.7328	146.049	109.284	99.3228	153.582	155.418	138.792	132.047	119.175	127.281	133.192	133.643
	122.242	121.068	97.3122	79.3303	102.54	100.725	103.116	121.566	104.803	121.624			110.122	145.287	117.505	94.8081	157.31	147.874	129.306	134.078	122.062	127.737	131.078	131.885
	116.904	136.598	90.4762	68.2492	97.3122	102.47	100.938	124.345	98.8816	121.624			107.117	142.493	107.35	98.5019	141.653	135.802	132.801	125.952	126.186	125.456	128.541	128.256
	133.986	132.01	98.5185	75.5527	90.4762	85.267	101.301	120.871	105.987	94.7162			110.942	152.145	112.669	99.1176	142.399	135.802	128.308	125.444	123.299	124.088	130.655	125.822
	128.114	129.892	102.942	87.6411	98.5185	83.0231	119.455	127.818	102.434	66.7319			98.6456	152.653	105.899	94.6029	150.6	161.454	128.308	114.271	120	124.088	127.696	130.767
	131.851	127.068	68.0635	70.8413	102.942	71.5	93.3132	142.681	99.4737	76.5949			98.3723	149.605	98.646	99.9384	155.818	138.82	124.314	103.606	117.113	123.631	128.118	126.015
	168.007	124.597	63.6931	79.834	58.0635	79.782	100.212	118.787	103.618	56.1448			112.582	150.367	90.9091	101.58	154.327	152.401	133.3	105.13	114.639	125.456	125.159	126.503
	123.31	160.01	53.2381	56.3082	93.6931	58.5081	119.455	126.429	108.947	54.8092			110.122	147.319	100.097	100.964	152.091	135.802	124.813	107.161	117.526	124.088	122.199	124.67
	144.662	134.128	90.0741	73.7898	83.2381	91.1669	112.92	126.429	107.763	32.2896			102.198	148.335	125.59	98.9124	155.818	167.49	120.819	103.606	111.753	122.719	123.044	127.241
	117.972	146.128	76.8042	76.0563	107.767	89.5054	104.932	127.123	105.395	41.9765			128.099	139.445	121.393	122.756	150.6	122.222	118.822	109.192	111.753	124.544	123.467	121.408
	108.363	133.775	74.7937	83.8634	108.169	81.2561	88.7595	114.656	110.498	50.5871			102.471	150.875	120.89	137.442	146.557	127.834	96.1863	123.001	99.1296	120.994	133.857	128.646
