# Supplementary material for: Distinct but overlapping roles of LRRTM1 and LRRTM2 in developing and mature hippocampal circuits
Source: eLife. 2022 Jun 6;11:e64742. doi: 10.7554/eLife.64742 (PMC9170246; doi:10.7554/eLife.64742)
Supplement: Figure 4—source data 2. [file elife-64742-fig4-data2.xlsx]

## Sheet: Sheet1
	WT	DKO
	13.3333	20
	16.6667	21.6667
	25	31.6667
	51.6667	11.6667
	20	30
	36.6667	33.3333
	41.6667	21.6667
	36.6667	23.3333
	33.3333	13.3333
	31.6667	28.3333
		20
		18.3333
		11.6667
		16.6667
		10
		3.33333
