# Supplementary material for: Distinct but overlapping roles of LRRTM1 and LRRTM2 in developing and mature hippocampal circuits
Source: eLife. 2022 Jun 6;11:e64742. doi: 10.7554/eLife.64742 (PMC9170246; doi:10.7554/eLife.64742)
Supplement: Figure 5—source data 1. [file elife-64742-fig5-data1.xlsx]

## Sheet: Insets
Frequency	Control	cDKO		Amplitude	Control	cDKO
	0.563889	0.881169			9.25961	8.24734
	0.38067	0.267381			10.5047	7.61824
	2.2338	0.151295			11.8053	5.31092
	0.4556	0.499202			7.56866	9.30346
	0.82123	0.433642			12.2896	11.2403
	1.99151	0.607612			12.2142	8.09144
	0.923555	0.38514			8.82444	9.40334
	0.419324	0.357			10.059	7.66698
	0.634747	0.785477			10.1459	8.93872
	0.67602	0.635103			10.748	8.82142
	0.909063	0.386816			10.9963	8.3429
		0.184687				6.54755

## Sheet: Cumulative
Frequency											Control										CDKO							Amplitude							Control											CDKO
	50	0	0	0	0	0	0	0	0	0	0	0	0		0	0	0	0	0	0	0	0	0	0	0	0			4	0	0	0	0	0	0	0	0	0	0	0		0	0	0	0	0	0	0	0
	100	0.02459	0.048193	0.405405	0.114943	0.13198	0.419355	0.162791	0.09333	0.141593	0.158273	0.131579	0.244275		0.093897	0.023256	0	0.061856	0.029703	0.029197	0.085366	0.142857	0.145833	0.091503	0.107438	0.074074			5	0	0	0	0.046296	0	0.011976	0.013274	0	0	0	0		0.027523	0.015385	0.377778	0.00885	0	0	0	0.022989
	150	0.04918	0.084337	0.530146	0.16092	0.192893	0.493952	0.237209	0.12	0.252212	0.194245	0.164474	0.305344		0.131455	0.046512	0.038462	0.103093	0.049505	0.058394	0.109756	0.15873	0.177083	0.111111	0.115702	0.074074			6	0.014706	0	0	0.231481	0	0.081836	0.053097	0	0	0.006098	0		0.233945	0.138462	0.8	0.035398	0.025862	0.155405	0.03	0.252874
	200	0.07377	0.096386	0.613306	0.16092	0.269036	0.554435	0.325581	0.13333	0.300885	0.223022	0.203947	0.351145		0.164319	0.069767	0.076923	0.113402	0.069307	0.087591	0.146341	0.174603	0.229167	0.124183	0.157025	0.074074			7	0.147059	0.060606	0.028	0.537037	0.023585	0.147705	0.247788	0.031579	0.038217	0.018293	0.035714		0.46789	0.430769	0.844444	0.230088	0.103448	0.324324	0.24	0.471264
	250	0.106557	0.108434	0.671518	0.183908	0.304569	0.604839	0.367442	0.18667	0.362832	0.302158	0.230263	0.381679		0.178404	0.116279	0.076923	0.123711	0.118812	0.153285	0.158537	0.174603	0.270833	0.156863	0.190083	0.074074			8	0.448529	0.212121	0.106	0.740741	0.084906	0.251497	0.5	0.273684	0.22293	0.04878	0.128571		0.605505	0.738462	0.977778	0.469027	0.25	0.662162	0.4	0.666667
	300	0.131148	0.108434	0.704782	0.206897	0.360406	0.647177	0.446512	0.18667	0.415929	0.345324	0.243421	0.389313		0.215962	0.139535	0.076923	0.134021	0.138614	0.182482	0.182927	0.174603	0.291667	0.196078	0.206612	0.074074			9	0.610294	0.40404	0.252	0.861111	0.160377	0.351297	0.672566	0.473684	0.414013	0.256098	0.314286		0.711009	0.846154	1	0.566372	0.353448	0.783784	0.58	0.804598
	350	0.155738	0.13253	0.725572	0.229885	0.390863	0.669355	0.465116	0.21333	0.455752	0.366906	0.276316	0.412214		0.253521	0.162791	0.076923	0.14433	0.168317	0.218978	0.195122	0.190476	0.317708	0.222222	0.22314	0.074074			10	0.720588	0.555556	0.41	0.898148	0.278302	0.433134	0.774336	0.642105	0.585987	0.463415	0.521429		0.784404	0.907692	1	0.725664	0.474138	0.844595	0.68	0.850575
	400	0.213115	0.13253	0.748441	0.252874	0.436548	0.695565	0.493023	0.25333	0.504425	0.388489	0.296053	0.427481		0.295775	0.162791	0.076923	0.164948	0.227723	0.240876	0.256098	0.206349	0.354167	0.24183	0.247934	0.074074			11	0.794118	0.717172	0.53	0.935185	0.400943	0.526946	0.849558	0.778947	0.694268	0.640244	0.678571		0.834862	0.969231	1	0.79646	0.551724	0.898649	0.77	0.908046
	450	0.229508	0.168675	0.775468	0.287356	0.456853	0.721774	0.530233	0.32	0.535398	0.417266	0.309211	0.458015		0.333333	0.186047	0.076923	0.195876	0.247525	0.277372	0.317073	0.238095	0.380208	0.261438	0.264463	0.074074			12	0.860294	0.787879	0.612	0.935185	0.533019	0.586826	0.889381	0.863158	0.770701	0.75	0.785714		0.894495	0.969231	1	0.849558	0.663793	0.932432	0.88	0.965517
	500	0.270492	0.192771	0.7921	0.310345	0.48731	0.735887	0.548837	0.32	0.588496	0.453237	0.335526	0.503817		0.370892	0.232558	0.115385	0.237113	0.247525	0.291971	0.329268	0.285714	0.421875	0.281046	0.31405	0.074074			13	0.875	0.818182	0.704	0.953704	0.641509	0.638723	0.90708	0.915789	0.847134	0.871951	0.842857		0.908257	0.969231	1	0.884956	0.724138	0.945946	0.9	0.965517
	550	0.278689	0.216867	0.806653	0.356322	0.527919	0.754032	0.55814	0.33333	0.654867	0.496403	0.355263	0.534351		0.394366	0.232558	0.115385	0.28866	0.257426	0.29927	0.365854	0.301587	0.458333	0.30719	0.338843	0.111111			14	0.911765	0.89899	0.77	0.962963	0.759434	0.684631	0.938053	0.947368	0.89172	0.902439	0.9		0.93578	0.984615	1	0.902655	0.793103	0.959459	0.92	0.977011
	600	0.303279	0.228916	0.823285	0.390805	0.548223	0.770161	0.572093	0.34667	0.663717	0.532374	0.355263	0.557252		0.408451	0.232558	0.115385	0.298969	0.267327	0.321168	0.402439	0.31746	0.473958	0.333333	0.363636	0.148148			15	0.963235	0.919192	0.806	0.981481	0.820755	0.734531	0.960177	0.957895	0.949045	0.932927	0.921429		0.958716	0.984615	1	0.920354	0.836207	0.966216	0.96	0.988506
	650	0.303279	0.289157	0.829522	0.402299	0.563452	0.78629	0.595349	0.36	0.685841	0.539568	0.388158	0.564885		0.431925	0.255814	0.115385	0.340206	0.277228	0.350365	0.426829	0.31746	0.489583	0.346405	0.404959	0.185185			16	0.970588	0.929293	0.85	0.981481	0.853774	0.784431	0.969027	0.957895	0.974522	0.95122	0.928571		0.972477	1	1	0.964602	0.87931	0.986486	0.96	0.988506
	700	0.311475	0.301205	0.839917	0.402299	0.598985	0.800403	0.6	0.38667	0.699115	0.561151	0.427632	0.610687		0.455399	0.302326	0.153846	0.350515	0.29703	0.357664	0.426829	0.333333	0.494792	0.372549	0.413223	0.222222			17	0.970588	0.949495	0.894	0.981481	0.891509	0.822355	0.977876	0.968421	0.993631	0.969512	0.935714		0.977064	1	1	0.964602	0.913793	0.993243	0.96	0.988506
	750	0.352459	0.325301	0.852391	0.413793	0.609137	0.822581	0.609302	0.4	0.725664	0.582734	0.440789	0.641221		0.507042	0.302326	0.153846	0.371134	0.326733	0.364964	0.439024	0.380952	0.520833	0.405229	0.429752	0.222222			18	0.985294	0.969697	0.922	0.981481	0.924528	0.848303	0.982301	0.968421	0.993631	0.981707	0.935714		0.990826	1	1	0.973451	0.913793	0.993243	0.97	0.988506
	800	0.360656	0.385542	0.858628	0.413793	0.624365	0.842742	0.655814	0.41333	0.756637	0.589928	0.473684	0.656489		0.530516	0.325581	0.153846	0.42268	0.326733	0.408759	0.45122	0.380952	0.541667	0.418301	0.429752	0.222222			19	1	0.969697	0.938	0.981481	0.95283	0.878244	0.986726	0.968421	0.993631	0.993902	0.935714		0.990826	1	1	0.982301	0.913793	0.993243	0.97	0.988506
	850	0.409836	0.385542	0.862786	0.413793	0.629442	0.854839	0.674419	0.42667	0.778761	0.597122	0.486842	0.671756		0.553991	0.325581	0.192308	0.42268	0.336634	0.430657	0.463415	0.380952	0.567708	0.431373	0.429752	0.259259			20	1	0.969697	0.95	0.990741	0.957547	0.902196	0.986726	0.978947	0.993631	0.993902	0.942857		0.990826	1	1	0.99115	0.931034	0.993243	0.97	0.988506
	900	0.42623	0.39759	0.869023	0.425287	0.649746	0.864919	0.674419	0.46667	0.80531	0.611511	0.506579	0.687023		0.558685	0.325581	0.192308	0.463918	0.386139	0.452555	0.463415	0.396825	0.583333	0.437908	0.446281	0.259259			21	1	0.969697	0.972	0.990741	0.971698	0.928144	0.986726	0.978947	1	1	0.95		0.990826	1	1	0.99115	0.956897	1	0.99	0.988506
	950	0.434426	0.421687	0.877339	0.45977	0.670051	0.875	0.674419	0.48	0.823009	0.618705	0.519737	0.717557		0.558685	0.325581	0.192308	0.494845	0.386139	0.467153	0.463415	0.412698	0.598958	0.45098	0.454545	0.259259			22	1	0.969697	0.984	0.990741	0.976415	0.946108	0.99115	0.978947	1	1	0.971429		0.995413	1	1	0.99115	0.974138	1	0.99	1
	1000	0.467213	0.433735	0.883576	0.45977	0.675127	0.883065	0.688372	0.48	0.836283	0.618705	0.539474	0.725191		0.577465	0.325581	0.192308	0.505155	0.425743	0.489051	0.47561	0.460317	0.640625	0.464052	0.46281	0.296296			23	1	0.969697	0.988	0.990741	0.976415	0.952096	0.995575	0.978947	1	1	0.985714		0.995413	1	1	0.99115	0.991379	1	0.99	1
	1050	0.483607	0.433735	0.891892	0.471264	0.695431	0.891129	0.693023	0.50667	0.849558	0.625899	0.539474	0.732824		0.600939	0.348837	0.192308	0.505155	0.445545	0.510949	0.487805	0.460317	0.651042	0.477124	0.471074	0.333333			24	1	0.979798	0.996	1	0.995283	0.96008	1	0.989474	1	1	0.985714		0.995413	1	1	0.99115	0.991379	1	0.99	1
	1100	0.491803	0.457831	0.89605	0.494253	0.71066	0.90121	0.711628	0.52	0.867257	0.647482	0.572368	0.748092		0.605634	0.348837	0.192308	0.505155	0.445545	0.525547	0.5	0.47619	0.651042	0.496732	0.504132	0.333333			25	1	0.989899	0.998	1	0.995283	0.962076	1	0.989474	1	1	0.985714		1	1	1	0.99115	0.991379	1	0.99	1
	1150	0.508197	0.46988	0.908524	0.494253	0.720812	0.91129	0.716279	0.54667	0.880531	0.654676	0.585526	0.748092		0.610329	0.372093	0.192308	0.546392	0.465347	0.532847	0.52439	0.507937	0.65625	0.522876	0.512397	0.333333			26	1	0.989899	0.998	1	1	0.966068	1	0.989474	1	1	0.985714		1	1	1	1	1	1	0.99	1
	1200	0.508197	0.46988	0.912682	0.494253	0.741117	0.931452	0.72093	0.54667	0.889381	0.669065	0.598684	0.748092		0.610329	0.395349	0.192308	0.556701	0.475248	0.540146	0.52439	0.539683	0.677083	0.535948	0.520661	0.333333			27	1	0.989899	0.998	1	1	0.976048	1	0.989474	1	1	0.985714		1	1	1	1	1	1	0.99	1
	1250	0.508197	0.46988	0.91684	0.494253	0.751269	0.931452	0.725581	0.58667	0.90708	0.683453	0.611842	0.763359		0.629108	0.395349	0.230769	0.56701	0.475248	0.547445	0.536585	0.555556	0.6875	0.562092	0.528926	0.37037			28	1	1	0.998	1	1	0.978044	1	0.989474	1	1	0.985714		1	1	1	1	1	1	0.99	1
	1300	0.516393	0.46988	0.925156	0.517241	0.761421	0.933468	0.739535	0.6	0.920354	0.690647	0.644737	0.778626		0.652582	0.395349	0.230769	0.56701	0.475248	0.562044	0.54878	0.555556	0.697917	0.562092	0.53719	0.37037			29	1	1	0.998	1	1	0.98004	1	0.989474	1	1	0.985714		1	1	1	1	1	1	1	1
	1350	0.540984	0.46988	0.927235	0.563218	0.766497	0.933468	0.75814	0.6	0.920354	0.705036	0.651316	0.793893		0.671362	0.395349	0.230769	0.57732	0.49505	0.576642	0.560976	0.587302	0.708333	0.575163	0.553719	0.37037			30	1	1	0.998	1	1	0.986028	1	0.989474	1	1	0.985714		1	1	1	1	1	1	1	1
	1400	0.557377	0.493976	0.931393	0.563218	0.766497	0.935484	0.776744	0.6	0.920354	0.726619	0.664474	0.80916		0.690141	0.395349	0.230769	0.57732	0.50495	0.605839	0.560976	0.587302	0.71875	0.601307	0.553719	0.37037			31	1	1	0.998	1	1	0.99002	1	0.989474	1	1	0.985714		1	1	1	1	1	1	1	1
	1450	0.581967	0.493976	0.931393	0.574713	0.771574	0.943548	0.781395	0.61333	0.929204	0.733813	0.677632	0.816794		0.699531	0.44186	0.230769	0.587629	0.50495	0.620438	0.573171	0.587302	0.723958	0.607843	0.553719	0.37037			32	1	1	1	1	1	0.996008	1	0.989474	1	1	0.985714		1	1	1	1	1	1	1	1
	1500	0.614754	0.506024	0.931393	0.597701	0.771574	0.943548	0.786047	0.62667	0.933628	0.748201	0.690789	0.832061		0.713615	0.465116	0.230769	0.587629	0.524752	0.627737	0.597561	0.603175	0.739583	0.627451	0.561983	0.407407			33	1	1	1	1	1	0.996008	1	0.989474	1	1	0.985714		1	1	1	1	1	1	1	1
	1550	0.631148	0.53012	0.93763	0.609195	0.781726	0.947581	0.790698	0.62667	0.933628	0.748201	0.697368	0.839695		0.71831	0.488372	0.230769	0.597938	0.534653	0.649635	0.609756	0.619048	0.744792	0.640523	0.570248	0.407407			34	1	1	1	1	1	0.996008	1	0.989474	1	1	0.985714		1	1	1	1	1	1	1	1
	1600	0.647541	0.566265	0.93763	0.62069	0.807107	0.951613	0.8	0.65333	0.938053	0.755396	0.710526	0.839695		0.732394	0.488372	0.269231	0.597938	0.544554	0.664234	0.609756	0.619048	0.760417	0.647059	0.578512	0.444444			35	1	1	1	1	1	0.998004	1	0.989474	1	1	0.985714		1	1	1	1	1	1	1	1
	1650	0.663934	0.578313	0.941788	0.62069	0.817259	0.955645	0.804651	0.65333	0.942478	0.769784	0.710526	0.847328		0.755869	0.488372	0.307692	0.608247	0.554455	0.671533	0.634146	0.634921	0.760417	0.660131	0.578512	0.444444			36	1	1	1	1	1	0.998004	1	0.989474	1	1	0.985714		1	1	1	1	1	1	1	1
	1700	0.672131	0.578313	0.948025	0.632184	0.827411	0.959677	0.813953	0.66667	0.946903	0.784173	0.717105	0.847328		0.760563	0.488372	0.307692	0.628866	0.564356	0.686131	0.646341	0.634921	0.760417	0.673203	0.595041	0.444444			37	1	1	1	1	1	0.998004	1	0.989474	1	1	0.992857		1	1	1	1	1	1	1	1
	1750	0.680328	0.590361	0.952183	0.666667	0.84264	0.961694	0.827907	0.66667	0.955752	0.791367	0.730263	0.854962		0.769953	0.488372	0.346154	0.628866	0.574257	0.686131	0.670732	0.650794	0.765625	0.673203	0.595041	0.444444			38	1	1	1	1	1	0.998004	1	0.989474	1	1	0.992857		1	1	1	1	1	1	1	1
	1800	0.696721	0.590361	0.956341	0.666667	0.84264	0.961694	0.832558	0.66667	0.960177	0.791367	0.75	0.854962		0.774648	0.511628	0.384615	0.628866	0.574257	0.70073	0.682927	0.650794	0.776042	0.679739	0.61157	0.481481			39	1	1	1	1	1	0.998004	1	0.989474	1	1	0.992857		1	1	1	1	1	1	1	1
	1850	0.704918	0.614458	0.95842	0.678161	0.847716	0.96371	0.846512	0.68	0.960177	0.791367	0.75	0.862595		0.802817	0.511628	0.423077	0.659794	0.584158	0.729927	0.682927	0.650794	0.796875	0.699346	0.619835	0.481481			40	1	1	1	1	1	0.998004	1	0.989474	1	1	0.992857		1	1	1	1	1	1	1	1
	1900	0.704918	0.614458	0.960499	0.689655	0.852792	0.965726	0.851163	0.68	0.964602	0.805755	0.763158	0.870229		0.812207	0.581395	0.423077	0.659794	0.594059	0.729927	0.682927	0.650794	0.807292	0.712418	0.636364	0.555556			41	1	1	1	1	1	0.998004	1	0.989474	1	1	0.992857		1	1	1	1	1	1	1	1
	1950	0.737705	0.638554	0.960499	0.712644	0.862944	0.969758	0.860465	0.69333	0.969027	0.805755	0.776316	0.877863		0.821596	0.604651	0.461538	0.659794	0.594059	0.744526	0.682927	0.650794	0.807292	0.732026	0.636364	0.592593			42	1	1	1	1	1	1	1	0.989474	1	1	1		1	1	1	1	1	1	1	1
	2000	0.745902	0.662651	0.960499	0.735632	0.86802	0.97379	0.869767	0.69333	0.977876	0.81295	0.782895	0.885496		0.840376	0.604651	0.5	0.680412	0.60396	0.766423	0.682927	0.650794	0.817708	0.75817	0.636364	0.592593			43	1	1	1	1	1	1	1	1	1	1	1		1	1	1	1	1	1	1	1
	2050	0.770492	0.674699	0.962578	0.735632	0.878173	0.975806	0.874419	0.72	0.982301	0.827338	0.789474	0.885496		0.840376	0.627907	0.5	0.701031	0.60396	0.781022	0.682927	0.650794	0.817708	0.764706	0.644628	0.592593			44	1	1	1	1	1	1	1	1	1	1	1		1	1	1	1	1	1	1	1
	2100	0.770492	0.686747	0.964657	0.747126	0.883249	0.975806	0.883721	0.72	0.982301	0.841727	0.796053	0.885496		0.849765	0.627907	0.5	0.701031	0.623762	0.781022	0.707317	0.650794	0.828125	0.771242	0.644628	0.62963			45	1	1	1	1	1	1	1	1	1	1	1		1	1	1	1	1	1	1	1
	2150	0.778689	0.686747	0.964657	0.758621	0.888325	0.977823	0.883721	0.72	0.986726	0.841727	0.809211	0.900763		0.85446	0.627907	0.5	0.701031	0.643564	0.788321	0.756098	0.666667	0.828125	0.771242	0.661157	0.703704			46	1	1	1	1	1	1	1	1	1	1	1		1	1	1	1	1	1	1	1
	2200	0.786885	0.686747	0.966736	0.758621	0.888325	0.981855	0.893023	0.72	0.99115	0.848921	0.815789	0.908397		0.859155	0.651163	0.5	0.71134	0.653465	0.80292	0.756098	0.698413	0.828125	0.784314	0.669421	0.740741			47	1	1	1	1	1	1	1	1	1	1	1		1	1	1	1	1	1	1	1
	2250	0.795082	0.698795	0.966736	0.770115	0.893401	0.981855	0.902326	0.72	0.99115	0.856115	0.815789	0.916031		0.868545	0.651163	0.5	0.721649	0.653465	0.810219	0.768293	0.698413	0.828125	0.784314	0.677686	0.777778			48	1	1	1	1	1	1	1	1	1	1	1		1	1	1	1	1	1	1	1
	2300	0.803279	0.73494	0.968815	0.770115	0.893401	0.981855	0.906977	0.72	0.99115	0.863309	0.828947	0.916031		0.882629	0.697674	0.5	0.742268	0.653465	0.817518	0.768293	0.714286	0.828125	0.803922	0.68595	0.777778			49	1	1	1	1	1	1	1	1	1	1	1		1	1	1	1	1	1	1	1
	2350	0.811475	0.73494	0.968815	0.770115	0.903553	0.981855	0.911628	0.73333	0.99115	0.863309	0.828947	0.916031		0.887324	0.697674	0.5	0.793814	0.663366	0.832117	0.768293	0.714286	0.828125	0.823529	0.694215	0.777778			50	1	1	1	1	1	1	1	1	1	1	1		1	1	1	1	1	1	1	1
	2400	0.811475	0.759036	0.968815	0.793103	0.903553	0.985887	0.911628	0.74667	0.995575	0.863309	0.848684	0.916031		0.896714	0.697674	0.538462	0.804124	0.673267	0.839416	0.768293	0.746032	0.833333	0.836601	0.719008	0.777778			51	1	1	1	1	1	1	1	1	1	1	1		1	1	1	1	1	1	1	1
	2450	0.819672	0.771084	0.972973	0.804598	0.903553	0.985887	0.911628	0.74667	1	0.870504	0.855263	0.916031		0.906103	0.72093	0.538462	0.814433	0.722772	0.846715	0.780488	0.777778	0.848958	0.836601	0.719008	0.777778			52	1	1	1	1	1	1	1	1	1	1	1		1	1	1	1	1	1	1	1
	2500	0.819672	0.771084	0.975052	0.804598	0.908629	0.989919	0.911628	0.76	1	0.870504	0.861842	0.923664		0.915493	0.72093	0.538462	0.814433	0.732673	0.854015	0.780488	0.777778	0.859375	0.843137	0.727273	0.777778			53	1	1	1	1	1	1	1	1	1	1	1		1	1	1	1	1	1	1	1
	2550	0.819672	0.771084	0.975052	0.816092	0.913706	0.991935	0.911628	0.76	1	0.884892	0.868421	0.923664		0.920188	0.744186	0.538462	0.835052	0.752475	0.868613	0.804878	0.809524	0.869792	0.843137	0.735537	0.777778			54	1	1	1	1	1	1	1	1	1	1	1		1	1	1	1	1	1	1	1
	2600	0.844262	0.771084	0.975052	0.827586	0.913706	0.993952	0.916279	0.76	1	0.892086	0.875	0.923664		0.920188	0.767442	0.653846	0.845361	0.752475	0.868613	0.817073	0.809524	0.869792	0.849673	0.735537	0.777778			55	1	1	1	1	1	1	1	1	1	1	1		1	1	1	1	1	1	1	1
	2650	0.852459	0.783133	0.977131	0.83908	0.918782	0.993952	0.92093	0.77333	1	0.892086	0.881579	0.923664		0.920188	0.767442	0.653846	0.845361	0.762376	0.890511	0.829268	0.825397	0.875	0.849673	0.735537	0.777778			56	1	1	1	1	1	1	1	1	1	1	1		1	1	1	1	1	1	1	1
	2700	0.860656	0.783133	0.97921	0.850575	0.918782	0.993952	0.92093	0.78667	1	0.892086	0.894737	0.923664		0.924883	0.790698	0.653846	0.845361	0.762376	0.890511	0.853659	0.825397	0.885417	0.849673	0.743802	0.777778			57	1	1	1	1	1	1	1	1	1	1	1		1	1	1	1	1	1	1	1
	2750	0.885246	0.783133	0.97921	0.862069	0.923858	0.993952	0.92093	0.81333	1	0.892086	0.901316	0.923664		0.934272	0.790698	0.653846	0.85567	0.782178	0.890511	0.890244	0.84127	0.890625	0.862745	0.760331	0.814815			58	1	1	1	1	1	1	1	1	1	1	1		1	1	1	1	1	1	1	1
	2800	0.885246	0.807229	0.981289	0.862069	0.923858	0.993952	0.934884	0.82667	1	0.899281	0.901316	0.931298		0.938967	0.790698	0.653846	0.865979	0.782178	0.912409	0.890244	0.84127	0.895833	0.862745	0.768595	0.814815			59	1	1	1	1	1	1	1	1	1	1	1		1	1	1	1	1	1	1	1
	2850	0.901639	0.819277	0.981289	0.862069	0.923858	0.995968	0.934884	0.82667	1	0.899281	0.907895	0.931298		0.938967	0.790698	0.692308	0.865979	0.792079	0.912409	0.890244	0.84127	0.895833	0.882353	0.77686	0.814815			60	1	1	1	1	1	1	1	1	1	1	1		1	1	1	1	1	1	1	1
	2900	0.901639	0.819277	0.981289	0.862069	0.923858	0.995968	0.934884	0.84	1	0.906475	0.907895	0.931298		0.938967	0.790698	0.692308	0.876289	0.80198	0.919708	0.902439	0.84127	0.895833	0.888889	0.785124	0.814815			61	1	1	1	1	1	1	1	1	1	1	1		1	1	1	1	1	1	1	1
	2950	0.901639	0.819277	0.981289	0.862069	0.923858	0.995968	0.934884	0.84	1	0.906475	0.907895	0.931298		0.948357	0.790698	0.692308	0.876289	0.821782	0.919708	0.902439	0.857143	0.895833	0.888889	0.793388	0.814815			62	1	1	1	1	1	1	1	1	1	1	1		1	1	1	1	1	1	1	1
	3000	0.909836	0.819277	0.981289	0.873563	0.928934	0.995968	0.934884	0.84	1	0.913669	0.914474	0.946565		0.953052	0.790698	0.692308	0.876289	0.821782	0.934307	0.902439	0.873016	0.895833	0.895425	0.826446	0.814815			63	1	1	1	1	1	1	1	1	1	1	1		1	1	1	1	1	1	1	1
	3050	0.909836	0.831325	0.983368	0.873563	0.928934	0.995968	0.939535	0.85333	1	0.920863	0.914474	0.946565		0.957746	0.790698	0.730769	0.886598	0.821782	0.941606	0.914634	0.888889	0.90625	0.895425	0.834711	0.851852			64	1	1	1	1	1	1	1	1	1	1	1		1	1	1	1	1	1	1	1
	3100	0.909836	0.831325	0.983368	0.885057	0.944162	0.995968	0.939535	0.88	1	0.920863	0.921053	0.946565		0.957746	0.790698	0.730769	0.886598	0.821782	0.941606	0.914634	0.888889	0.90625	0.895425	0.859504	0.851852			65	1	1	1	1	1	1	1	1	1	1	1		1	1	1	1	1	1	1	1
	3150	0.909836	0.831325	0.983368	0.885057	0.944162	0.995968	0.939535	0.88	1	0.928058	0.927632	0.946565		0.967136	0.813953	0.730769	0.886598	0.821782	0.941606	0.914634	0.888889	0.90625	0.895425	0.859504	0.851852			66	1	1	1	1	1	1	1	1	1	1	1		1	1	1	1	1	1	1	1
	3200	0.918033	0.831325	0.983368	0.885057	0.949239	0.995968	0.944186	0.88	1	0.928058	0.927632	0.946565		0.971831	0.813953	0.730769	0.886598	0.831683	0.941606	0.914634	0.888889	0.90625	0.908497	0.859504	0.851852			67	1	1	1	1	1	1	1	1	1	1	1		1	1	1	1	1	1	1	1
	3250	0.918033	0.831325	0.985447	0.885057	0.949239	0.995968	0.944186	0.89333	1	0.928058	0.934211	0.954198		0.971831	0.813953	0.769231	0.907216	0.831683	0.948905	0.939024	0.904762	0.90625	0.921569	0.859504	0.851852			68	1	1	1	1	1	1	1	1	1	1	1		1	1	1	1	1	1	1	1
	3300	0.918033	0.831325	0.987526	0.896552	0.959391	0.995968	0.948837	0.89333	1	0.935252	0.934211	0.954198		0.971831	0.837209	0.769231	0.907216	0.831683	0.948905	0.939024	0.904762	0.921875	0.928105	0.859504	0.851852			69	1	1	1	1	1	1	1	1	1	1	1		1	1	1	1	1	1	1	1
	3350	0.918033	0.843373	0.989605	0.896552	0.964467	0.997984	0.95814	0.89333	1	0.935252	0.934211	0.954198		0.971831	0.837209	0.769231	0.907216	0.851485	0.948905	0.95122	0.904762	0.927083	0.934641	0.859504	0.851852			70	1	1	1	1	1	1	1	1	1	1	1		1	1	1	1	1	1	1	1
	3400	0.918033	0.843373	0.989605	0.896552	0.969543	0.997984	0.962791	0.89333	1	0.956835	0.940789	0.954198		0.971831	0.883721	0.769231	0.907216	0.881188	0.948905	0.95122	0.920635	0.927083	0.934641	0.867769	0.851852			71	1	1	1	1	1	1	1	1	1	1	1		1	1	1	1	1	1	1	1
	3450	0.92623	0.855422	0.993763	0.908046	0.969543	0.997984	0.962791	0.89333	1	0.956835	0.947368	0.954198		0.971831	0.883721	0.769231	0.917526	0.881188	0.948905	0.95122	0.936508	0.932292	0.934641	0.867769	0.851852			72	1	1	1	1	1	1	1	1	1	1	1		1	1	1	1	1	1	1	1
	3500	0.934426	0.855422	0.993763	0.908046	0.969543	0.997984	0.967442	0.90667	1	0.956835	0.947368	0.954198		0.976526	0.883721	0.807692	0.917526	0.910891	0.948905	0.95122	0.936508	0.9375	0.934641	0.867769	0.888889			73	1	1	1	1	1	1	1	1	1	1	1		1	1	1	1	1	1	1	1
	3550	0.942623	0.879518	0.993763	0.908046	0.969543	0.997984	0.967442	0.92	1	0.956835	0.947368	0.969466		0.981221	0.883721	0.807692	0.917526	0.910891	0.948905	0.95122	0.936508	0.942708	0.947712	0.876033	0.888889			74	1	1	1	1	1	1	1	1	1	1	1		1	1	1	1	1	1	1	1
	3600	0.95082	0.951807	0.993763	0.908046	0.969543	0.997984	0.976744	0.92	1	0.964029	0.960526	0.977099		0.981221	0.906977	0.807692	0.917526	0.910891	0.956204	0.95122	0.936508	0.953125	0.947712	0.884298	0.888889			75	1	1	1	1	1	1	1	1	1	1	1		1	1	1	1	1	1	1	1
	3650	0.95082	0.963855	0.993763	0.908046	0.969543	0.997984	0.976744	0.92	1	0.964029	0.960526	0.977099		0.981221	0.906977	0.807692	0.927835	0.910891	0.956204	0.95122	0.936508	0.953125	0.947712	0.892562	0.888889			76	1	1	1	1	1	1	1	1	1	1	1		1	1	1	1	1	1	1	1
	3700	0.95082	0.963855	0.993763	0.908046	0.969543	0.997984	0.981395	0.93333	1	0.964029	0.960526	0.977099		0.981221	0.906977	0.807692	0.927835	0.910891	0.956204	0.95122	0.936508	0.963542	0.973856	0.892562	0.888889			77	1	1	1	1	1	1	1	1	1	1	1		1	1	1	1	1	1	1	1
	3750	0.959016	0.975904	0.995842	0.931034	0.969543	0.997984	0.986047	0.93333	1	0.964029	0.960526	0.977099		0.981221	0.930233	0.807692	0.927835	0.920792	0.956204	0.95122	0.936508	0.963542	0.973856	0.900826	0.888889			78	1	1	1	1	1	1	1	1	1	1	1		1	1	1	1	1	1	1	1
	3800	0.967213	0.975904	0.995842	0.931034	0.969543	0.997984	0.986047	0.93333	1	0.964029	0.967105	0.984733		0.985915	0.930233	0.846154	0.927835	0.930693	0.956204	0.95122	0.936508	0.96875	0.980392	0.909091	0.888889			79	1	1	1	1	1	1	1	1	1	1	1		1	1	1	1	1	1	1	1
	3850	0.97541	0.975904	0.997921	0.931034	0.969543	0.997984	0.986047	0.93333	1	0.964029	0.967105	0.984733		0.985915	0.930233	0.846154	0.938144	0.940594	0.963504	0.95122	0.936508	0.96875	0.986928	0.909091	0.962963			80	1	1	1	1	1	1	1	1	1	1	1		1	1	1	1	1	1	1	1
	3900	0.97541	0.975904	0.997921	0.954023	0.969543	0.997984	0.986047	0.94667	1	0.971223	0.967105	0.984733		0.985915	0.930233	0.846154	0.948454	0.940594	0.963504	0.95122	0.936508	0.96875	0.986928	0.917355	0.962963			81	1	1	1	1	1	1	1	1	1	1	1		1	1	1	1	1	1	1	1
	3950	0.97541	0.975904	0.997921	0.965517	0.974619	0.997984	0.986047	0.94667	1	0.971223	0.967105	0.984733		0.99061	0.930233	0.884615	0.948454	0.950495	0.970803	0.95122	0.936508	0.973958	0.986928	0.92562	0.962963			82	1	1	1	1	1	1	1	1	1	1	1		1	1	1	1	1	1	1	1
	4000	0.97541	0.987952	0.997921	0.965517	0.974619	0.997984	0.986047	0.94667	1	0.971223	0.967105	0.992366		0.99061	0.953488	0.884615	0.948454	0.960396	0.970803	0.95122	0.936508	0.973958	0.993464	0.92562	0.962963			83	1	1	1	1	1	1	1	1	1	1	1		1	1	1	1	1	1	1	1
	4050	0.97541	0.987952	0.997921	0.965517	0.979695	0.997984	0.990698	0.94667	1	0.971223	0.967105	0.992366		0.99061	0.953488	0.923077	0.948454	0.960396	0.970803	0.963415	0.936508	0.979167	0.993464	0.92562	0.962963			84	1	1	1	1	1	1	1	1	1	1	1		1	1	1	1	1	1	1	1
	4100	0.983607	0.987952	0.997921	0.965517	0.984772	0.997984	0.990698	0.94667	1	0.978417	0.967105	0.992366		0.99061	0.953488	0.923077	0.958763	0.960396	0.970803	0.963415	0.952381	0.984375	1	0.933884	0.962963			85	1	1	1	1	1	1	1	1	1	1	1		1	1	1	1	1	1	1	1
	4150	0.983607	0.987952	1	0.965517	0.984772	0.997984	0.990698	0.96	1	0.978417	0.967105	0.992366		0.99061	0.953488	0.961538	0.969072	0.970297	0.970803	0.97561	0.952381	0.984375	1	0.942149	0.962963			86	1	1	1	1	1	1	1	1	1	1	1		1	1	1	1	1	1	1	1
	4200	0.983607	0.987952	1	0.965517	0.984772	0.997984	0.990698	0.97333	1	0.978417	0.967105	0.992366		0.995305	0.976744	0.961538	0.969072	0.970297	0.970803	0.97561	0.952381	0.984375	1	0.942149	0.962963			87	1	1	1	1	1	1	1	1	1	1	1		1	1	1	1	1	1	1	1
	4250	0.983607	0.987952	1	0.965517	0.984772	0.997984	0.990698	0.97333	1	0.978417	0.967105	0.992366		0.995305	1	0.961538	0.979381	0.970297	0.970803	0.97561	0.952381	0.984375	1	0.942149	0.962963			88	1	1	1	1	1	1	1	1	1	1	1		1	1	1	1	1	1	1	1
	4300	0.983607	1	1	0.965517	0.989848	0.997984	0.990698	0.97333	1	0.985612	0.973684	0.992366		0.995305	1	0.961538	0.989691	0.980198	0.978102	0.97561	0.952381	0.984375	1	0.950413	0.962963			89	1	1	1	1	1	1	1	1	1	1	1		1	1	1	1	1	1	1	1
	4350	0.983607	1	1	0.965517	0.989848	0.997984	0.990698	0.97333	1	0.985612	0.986842	0.992366		0.995305	1	0.961538	1	0.980198	0.978102	0.97561	0.952381	0.984375	1	0.950413	0.962963			90	1	1	1	1	1	1	1	1	1	1	1		1	1	1	1	1	1	1	1
	4400	0.983607	1	1	0.965517	0.994924	0.997984	0.990698	0.98667	1	0.985612	0.986842	1		0.995305	1	0.961538	1	0.980198	0.985401	0.97561	0.968254	0.989583	1	0.958678	0.962963			91	1	1	1	1	1	1	1	1	1	1	1		1	1	1	1	1	1	1	1
	4450	0.983607	1	1	0.965517	0.994924	0.997984	0.990698	0.98667	1	0.985612	0.993421	1		0.995305	1	0.961538	1	0.980198	0.985401	0.97561	0.968254	0.989583	1	0.958678	0.962963			92	1	1	1	1	1	1	1	1	1	1	1		1	1	1	1	1	1	1	1
	4500	0.991803	1	1	0.977011	0.994924	0.997984	0.990698	0.98667	1	0.985612	1	1		0.995305	1	0.961538	1	0.980198	0.985401	0.987805	0.968254	0.989583	1	0.975207	0.962963			93	1	1	1	1	1	1	1	1	1	1	1		1	1	1	1	1	1	1	1
	4550	0.991803	1	1	0.988506	1	1	0.990698	0.98667	1	0.992806	1	1		1	1	0.961538	1	0.990099	0.992701	1	0.968254	0.994792	1	0.991736	0.962963			94	1	1	1	1	1	1	1	1	1	1	1		1	1	1	1	1	1	1	1
	4600	1	1	1	0.988506	1	1	1	0.98667	1	1	1	1		1	1	1	1	0.990099	0.992701	1	0.984127	0.994792	1	1	1			95	1	1	1	1	1	1	1	1	1	1	1		1	1	1	1	1	1	1	1
	4650	1	1	1	1	1	1	1	1	1	1	1	1		1	1	1	1	1	1	1	1	1	1	1	1			96	1	1	1	1	1	1	1	1	1	1	1		1	1	1	1	1	1	1	1
																													97	1	1	1	1	1	1	1	1	1	1	1		1	1	1	1	1	1	1	1
																													98	1	1	1	1	1	1	1	1	1	1	1		1	1	1	1	1	1	1	1
																													99	1	1	1	1	1	1	1	1	1	1	1		1	1	1	1	1	1	1	1
																													100	1	1	1	1	1	1	1	1	1	1	1		1	1	1	1	1	1	1	1
[truncated: 4 more columns]
