# Supplementary material for: Distinct but overlapping roles of LRRTM1 and LRRTM2 in developing and mature hippocampal circuits
Source: eLife. 2022 Jun 6;11:e64742. doi: 10.7554/eLife.64742 (PMC9170246; doi:10.7554/eLife.64742)
Supplement: Figure 6—figure supplement 2—source data 1. [file elife-64742-fig6-figsupp2-data1.xlsx]

## Sheet: CA1
		WT					cDKO
GAD65 CA1
Oriens	9.80073	10.1216	9.84862			8.9839	8.65624	10.4404
Radiatum	8.42597	10.0934	8.21164			8.02682	8.24155	11.075
Lacunosum	8.09487	9.09188	8.74798			7.62232	7.7465	9.85397
Note: data are per mouse

## Sheet: DG
		WT					cDKO
GAD65 DG
Inner molecular layer	8.21949	7.29486	11.3264			9.20067	8.09524	9.37763
Medial molecular layer	8.25242	6.60305	10.3241			9.06145	8.51503	7.19264
Outer molecular layer	7.18288	6.93515	8.68095			9.04879	6.20205	8.17967
