# Supplementary material for: Distinct but overlapping roles of LRRTM1 and LRRTM2 in developing and mature hippocampal circuits
Source: eLife. 2022 Jun 6;11:e64742. doi: 10.7554/eLife.64742 (PMC9170246; doi:10.7554/eLife.64742)
Supplement: Figure 6—source data 1. [file elife-64742-fig6-data1.xlsx]

## Sheet: Sheet1
		Percent infection
CA1	Mouse 1	Mouse 2	Mouse 3
1.34	0	1.38889
1.54	45.946	63.4146
1.84	83.6991	68.9751	77.7273
2.06	105.048	80.829	96.5517
2.3		104.124	79.6923
2.46	6.46204	0	50.5682
2.8	4.91573		15.2999
		Percent infection
DG	Mouse 1	Mouse 2	Mouse 3
1.34	0	0	9.71223
1.54	66.5803	0	52.0476
1.84	88.122	57.1942	49.4302
2.06	91.1315	75.2896	78.718
2.3		67.7966	37.8738
2.46	0	40.7311
2.8	0	28.1188	28.0585
