# Supplementary material for: Distinct but overlapping roles of LRRTM1 and LRRTM2 in developing and mature hippocampal circuits
Source: eLife. 2022 Jun 6;11:e64742. doi: 10.7554/eLife.64742 (PMC9170246; doi:10.7554/eLife.64742)
Supplement: Figure 6—source data 2. [file elife-64742-fig6-data2.xlsx]

## Sheet: CA1
VGlut1 CA1		WT					CDKO
Oriens	8.42484	9.27527	10.1346			8.52852	10.3267	9.47966
Radiatum	7.87174	10.5787	10.0131			7.85919	10.6587	11.6754
Lacunosum	7.91727	11.029	9.93426			6.49972	10.6599	11.2965
Note: values are per mouse

## Sheet: DG
VGlut1 DG		WT					CDKO
Inner molecular layer	10.1882	8.06924	9.77233			10.0347	9.28958	8.17799
Medial molecular layer	9.09842	7.8295	9.42307			8.96853	9.75699	9.84691
Outer molecular layer	9.62463	9.6283	9.1319			8.76609	10.7964	9.2647
Note: values are per mouse
