# Supplementary material for: Distinct but overlapping roles of LRRTM1 and LRRTM2 in developing and mature hippocampal circuits
Source: eLife. 2022 Jun 6;11:e64742. doi: 10.7554/eLife.64742 (PMC9170246; doi:10.7554/eLife.64742)
Supplement: Figure 7—source data 1. [file elife-64742-fig7-data1.xlsx]

## Sheet: CA1
Frequency	Control	Cre		Amplitude	Control	Cre
	0.943912	0.321485			10.8338	7.43915
	0.616123	1.80022			14.6991	8.17237
	0.64206	0.824785			8.78401	7.5462
	0.424788	0.547312			9.11003	5.54872
	0.701714	1.04309			17.8353	7.53125
	1.29187	2.4405			12.7577	8.71786
	1.23756	2.09908			12.21	9.69084
	0.802656	0.950423			12.9986	6.1449
	0.423547	2.66452			10.2764	9.77993
	0.855088	0.41244			10.7011	6.87154
	0.468481	0.765882			8.11608	6.80578
	1.33589	3.19626			9.82076	9.18133
	1.21678				11.1744
	0.779331				8.48347
	1.92522				9.69039
	0.784005				10.0133

## Sheet: DG
Frequncy	Control	Cre		Amplitude	Control	Cre
	0.740628	0.365498			11.0986	8.59445
	0.420489	0.330148			8.77576	10.8012
	1.33091	0.432572			9.74046	5.9024
	1.96135	0.65919			10.1436	9.04602
	1.25631	0.604231			7.73503	7.4446
	0.526638	0.384723			9.3814	7.22941
	0.570232	0.610758			10.6724	6.13483
	0.925939	0.333808			13.6326	5.96036
	0.76073	0.295962			9.51106	7.08769
	0.830662	0.857706			7.1006	8.56445
	0.707621	0.686728			9.03713	7.3407
	0.892334	0.687518			10.5146	4.72964
	0.556632	0.39581			8.10316	7.80182
	0.400911	1.82557			11.6441	7.93393
	0.718263				12.4625
	0.57112				7.97634

## Sheet: Cumulative CA1
Frequency																															Amplitude
		Control																	Cre																					Control
	50	0	0	0	0	0	0	0	0	0	0	0	0	0	0	0	0		0	0	0	0	0	0	0	0	0	0	0			4	0	0	0	0	0	0	0	0	0	0	0	0	0	0	0	0
	100	0.127119	0.128889	0.114754	0.174419	0.136691	0.11054	0.193277	0.06867	0.054054	0.071713	0.126984	0.248588	0.188776	0.125506	0.225873	0.105263		0.088608	0.256932	0.113821	0.253521	0.193333	0.387368	0.324	0.2	0.278997	0.206897	0.101167			5	0	0	0.005128	0.057143	0	0	0.024064	0	0	0	0.013889	0	0	0.007605	0.004615	0
	150	0.186441	0.164444	0.147541	0.244186	0.172662	0.172237	0.266106	0.120172	0.072072	0.115538	0.166667	0.30226	0.265306	0.186235	0.308008	0.153509		0.101266	0.343808	0.158537	0.373239	0.226667	0.515789	0.4	0.248	0.401254	0.232759	0.175097			6	0.016129	0	0.05641	0.190476	0	0	0.034759	0.016393	0	0.030651	0.173611	0.01676	0	0.125475	0.029231	0.012658
	200	0.237288	0.177778	0.180328	0.313953	0.230216	0.208226	0.319328	0.141631	0.09009	0.171315	0.198413	0.350282	0.326531	0.230769	0.386037	0.214912		0.151899	0.408503	0.203252	0.471831	0.293333	0.578947	0.44	0.28	0.492163	0.241379	0.194553			7	0.056452	0	0.225641	0.438095	0	0	0.058824	0.040984	0.053435	0.114943	0.430556	0.089385	0.004975	0.323194	0.161538	0.092827
	250	0.279661	0.213333	0.20765	0.325581	0.244604	0.264781	0.394958	0.167382	0.108108	0.215139	0.206349	0.387006	0.336735	0.287449	0.451745	0.25		0.177215	0.454713	0.223577	0.507042	0.346667	0.621053	0.496	0.312	0.564263	0.284483	0.2607			8	0.16129	0.0125	0.425641	0.52381	0	0.035533	0.096257	0.147541	0.145038	0.218391	0.631944	0.217877	0.069652	0.562738	0.364615	0.232068
	300	0.338983	0.248889	0.245902	0.383721	0.273381	0.311054	0.42577	0.2103	0.117117	0.247012	0.222222	0.426554	0.362245	0.303644	0.492813	0.263158		0.189873	0.497227	0.260163	0.549296	0.42	0.677895	0.54	0.36	0.60815	0.301724	0.299611			9	0.370968	0.0625	0.635897	0.609524	0	0.106599	0.181818	0.27459	0.374046	0.360153	0.736111	0.435754	0.174129	0.73384	0.549231	0.447257
	350	0.381356	0.28	0.278689	0.395349	0.316547	0.352185	0.478992	0.23176	0.126126	0.306773	0.238095	0.468927	0.397959	0.348178	0.548255	0.289474		0.202532	0.55268	0.288618	0.577465	0.446667	0.741053	0.572	0.416	0.652038	0.327586	0.354086			10	0.475806	0.095833	0.738462	0.685714	0	0.263959	0.312834	0.393443	0.519084	0.524904	0.805556	0.645251	0.368159	0.836502	0.676923	0.620253
	400	0.381356	0.284444	0.295082	0.406977	0.338129	0.395887	0.515406	0.266094	0.162162	0.322709	0.253968	0.49435	0.433673	0.368421	0.603696	0.320175		0.240506	0.600739	0.333333	0.605634	0.48	0.768421	0.608	0.448	0.677116	0.336207	0.377432			11	0.596774	0.191667	0.810256	0.761905	0	0.428934	0.470588	0.459016	0.694656	0.666667	0.833333	0.765363	0.542289	0.874525	0.781538	0.751055
	450	0.432203	0.306667	0.31694	0.453488	0.366906	0.419023	0.54902	0.287554	0.171171	0.342629	0.261905	0.528249	0.494898	0.396761	0.62423	0.342105		0.240506	0.628466	0.353659	0.619718	0.493333	0.793684	0.656	0.472	0.705329	0.344828	0.416342			12	0.66129	0.329167	0.902564	0.8	0.041096	0.545685	0.601604	0.536885	0.816794	0.743295	0.909722	0.849162	0.681592	0.912548	0.841538	0.822785
	500	0.466102	0.342222	0.333333	0.453488	0.374101	0.455013	0.593838	0.317597	0.234234	0.390438	0.277778	0.539548	0.515306	0.437247	0.663244	0.368421		0.265823	0.661738	0.382114	0.640845	0.5	0.816842	0.684	0.496	0.742947	0.387931	0.451362			13	0.798387	0.416667	0.964103	0.847619	0.082192	0.65736	0.673797	0.610656	0.870229	0.816092	0.958333	0.910615	0.80597	0.927757	0.893846	0.877637
	550	0.491525	0.364444	0.371585	0.465116	0.388489	0.498715	0.627451	0.360515	0.243243	0.418327	0.285714	0.556497	0.535714	0.449393	0.696099	0.403509		0.278481	0.68207	0.418699	0.65493	0.533333	0.835789	0.712	0.512	0.758621	0.387931	0.478599			14	0.870968	0.533333	0.969231	0.87619	0.164384	0.725888	0.748663	0.67623	0.923664	0.862069	0.965278	0.930168	0.890547	0.95057	0.916923	0.919831
	600	0.508475	0.404444	0.393443	0.465116	0.388489	0.51671	0.641457	0.390558	0.27027	0.434263	0.285714	0.579096	0.581633	0.477733	0.714579	0.416667		0.303797	0.700555	0.439024	0.676056	0.546667	0.850526	0.74	0.528	0.786834	0.422414	0.486381			15	0.927419	0.6625	0.984615	0.914286	0.219178	0.796954	0.81016	0.745902	0.938931	0.915709	0.972222	0.946927	0.925373	0.961977	0.935385	0.940928
	650	0.525424	0.435556	0.420765	0.511628	0.402878	0.534704	0.661064	0.44206	0.279279	0.446215	0.293651	0.590395	0.607143	0.518219	0.747433	0.447368		0.303797	0.726433	0.447154	0.676056	0.566667	0.873684	0.76	0.544	0.802508	0.431034	0.509728			16	0.935484	0.7125	0.989744	0.92381	0.321918	0.832487	0.834225	0.782787	0.961832	0.934866	0.986111	0.960894	0.945274	0.965779	0.946154	0.953586
	700	0.533898	0.444444	0.42623	0.511628	0.431655	0.55527	0.689076	0.472103	0.315315	0.47012	0.301587	0.618644	0.617347	0.546559	0.767967	0.491228		0.303797	0.746765	0.471545	0.690141	0.606667	0.892632	0.788	0.544	0.818182	0.456897	0.540856			17	0.943548	0.779167	0.989744	0.933333	0.465753	0.873096	0.863636	0.819672	0.969466	0.957854	0.986111	0.972067	0.965174	0.969582	0.955385	0.966245
	750	0.559322	0.448889	0.453552	0.534884	0.453237	0.59126	0.708683	0.493562	0.342342	0.486056	0.301587	0.644068	0.637755	0.566802	0.774127	0.5		0.303797	0.76525	0.495935	0.690141	0.626667	0.903158	0.804	0.56	0.833856	0.474138	0.579767			18	0.951613	0.8125	0.994872	0.961905	0.643836	0.901015	0.893048	0.856557	0.984733	0.961686	0.986111	0.98324	0.975124	0.977186	0.961538	0.970464
	800	0.559322	0.471111	0.464481	0.534884	0.467626	0.609254	0.72549	0.519313	0.36036	0.501992	0.31746	0.663842	0.658163	0.59919	0.790554	0.52193		0.329114	0.785582	0.512195	0.690141	0.633333	0.911579	0.808	0.616	0.84326	0.474138	0.595331			19	0.967742	0.866667	1	0.971429	0.746575	0.928934	0.925134	0.877049	0.984733	0.965517	0.986111	0.99162	0.99005	0.980989	0.970769	0.978903
	850	0.559322	0.502222	0.486339	0.546512	0.47482	0.62982	0.739496	0.545064	0.396396	0.52988	0.333333	0.689266	0.668367	0.607287	0.804928	0.54386		0.329114	0.80037	0.54878	0.697183	0.66	0.924211	0.816	0.624	0.852665	0.474138	0.626459			20	0.967742	0.9	1	0.980952	0.80137	0.944162	0.946524	0.901639	0.992366	0.97318	1	0.99162	0.995025	0.988593	0.975385	0.983122
	900	0.567797	0.515556	0.497268	0.546512	0.496403	0.663239	0.747899	0.553648	0.405405	0.549801	0.365079	0.711864	0.683673	0.623482	0.819302	0.561404		0.341772	0.815157	0.569106	0.711268	0.686667	0.930526	0.828	0.632	0.874608	0.5	0.649805			21	0.975806	0.916667	1	0.980952	0.849315	0.954315	0.965241	0.918033	0.992366	0.97318	1	0.99162	0.995025	0.988593	0.976923	0.983122
	950	0.584746	0.537778	0.508197	0.581395	0.503597	0.683805	0.767507	0.583691	0.45045	0.581673	0.380952	0.728814	0.688776	0.635628	0.827515	0.583333		0.379747	0.822551	0.585366	0.725352	0.693333	0.934737	0.84	0.648	0.893417	0.508621	0.669261			22	0.991935	0.9375	1	0.980952	0.89726	0.956853	0.967914	0.934426	0.992366	0.977011	1	0.994413	1	0.992395	0.978462	0.983122
	1000	0.618644	0.546667	0.519126	0.593023	0.517986	0.701799	0.798319	0.596567	0.45045	0.613546	0.388889	0.737288	0.709184	0.643725	0.833676	0.587719		0.392405	0.831793	0.597561	0.732394	0.713333	0.938947	0.844	0.656	0.902821	0.508621	0.677043			23	0.991935	0.945833	1	0.990476	0.90411	0.964467	0.970588	0.938525	0.992366	0.980843	1	0.997207	1	0.996198	0.984615	0.983122
	1050	0.652542	0.56	0.535519	0.604651	0.532374	0.714653	0.812325	0.60515	0.468468	0.633466	0.396825	0.748588	0.729592	0.647773	0.843943	0.614035		0.405063	0.841035	0.609756	0.746479	0.74	0.941053	0.852	0.688	0.912226	0.543103	0.692607			24	0.991935	0.958333	1	1	0.910959	0.967005	0.973262	0.942623	1	0.988506	1	0.997207	1	0.996198	0.987692	0.987342
	1100	0.686441	0.586667	0.562842	0.616279	0.532374	0.727506	0.829132	0.618026	0.477477	0.653386	0.404762	0.759887	0.734694	0.647773	0.850103	0.640351		0.405063	0.855823	0.617886	0.753521	0.746667	0.949474	0.864	0.712	0.92163	0.560345	0.719844			25	0.991935	0.975	1	1	0.924658	0.979695	0.975936	0.946721	1	0.988506	1	0.997207	1	0.996198	0.990769	0.991561
	1150	0.70339	0.586667	0.568306	0.627907	0.532374	0.735219	0.854342	0.626609	0.495495	0.673307	0.428571	0.759887	0.755102	0.65587	0.856263	0.657895		0.405063	0.863216	0.634146	0.753521	0.753333	0.953684	0.876	0.752	0.9279	0.568966	0.7393			26	0.991935	0.975	1	1	0.938356	0.984772	0.97861	0.95082	1	0.992337	1	1	1	0.996198	0.990769	0.991561
	1200	0.711864	0.608889	0.584699	0.639535	0.546763	0.748072	0.857143	0.635193	0.522523	0.677291	0.436508	0.765537	0.770408	0.672065	0.862423	0.679825		0.417722	0.876155	0.642276	0.767606	0.766667	0.955789	0.888	0.76	0.934169	0.577586	0.77821			27	1	0.983333	1	1	0.945205	0.984772	0.97861	0.954918	1	0.992337	1	1	1	0.996198	0.990769	0.991561
	1250	0.728814	0.613333	0.601093	0.639535	0.553957	0.766067	0.865546	0.656652	0.522523	0.685259	0.444444	0.774011	0.77551	0.684211	0.87269	0.692982		0.43038	0.883549	0.658537	0.774648	0.78	0.955789	0.896	0.768	0.946708	0.586207	0.797665			28	1	0.983333	1	1	0.958904	0.98731	0.986631	0.963115	1	0.992337	1	1	1	0.996198	0.992308	0.991561
	1300	0.728814	0.613333	0.606557	0.639535	0.568345	0.794344	0.876751	0.686695	0.567568	0.717131	0.452381	0.776836	0.790816	0.688259	0.87885	0.710526		0.455696	0.890943	0.658537	0.78169	0.78	0.962105	0.904	0.784	0.956113	0.603448	0.809339			29	1	0.991667	1	1	0.972603	0.98731	0.986631	0.963115	1	0.992337	1	1	1	0.996198	0.993846	0.991561
	1350	0.737288	0.617778	0.617486	0.651163	0.597122	0.820051	0.885154	0.699571	0.576577	0.741036	0.452381	0.788136	0.790816	0.704453	0.893224	0.719298		0.468354	0.900185	0.666667	0.788732	0.8	0.970526	0.912	0.784	0.965517	0.62069	0.81323			30	1	0.991667	1	1	0.972603	0.989848	0.994652	0.97541	1	0.992337	1	1	1	0.996198	0.995385	0.991561
	1400	0.745763	0.631111	0.63388	0.662791	0.618705	0.832905	0.896359	0.712446	0.585586	0.749004	0.452381	0.80226	0.795918	0.724696	0.897331	0.732456		0.468354	0.907579	0.670732	0.802817	0.82	0.976842	0.92	0.784	0.968652	0.637931	0.832685			31	1	0.991667	1	1	0.972603	0.994924	0.997326	0.983607	1	0.992337	1	1	1	0.996198	0.995385	1
	1450	0.762712	0.644444	0.650273	0.686047	0.647482	0.845758	0.89916	0.729614	0.612613	0.76494	0.468254	0.80791	0.816327	0.728745	0.903491	0.736842		0.468354	0.909427	0.691057	0.809859	0.82	0.978947	0.92	0.784	0.974922	0.646552	0.840467			32	1	0.995833	1	1	0.979452	0.994924	0.997326	0.983607	1	0.992337	1	1	1	0.996198	0.996923	1
	1500	0.771186	0.662222	0.655738	0.697674	0.654676	0.863753	0.901961	0.742489	0.612613	0.776892	0.492063	0.816384	0.826531	0.736842	0.913758	0.745614		0.493671	0.916821	0.703252	0.816901	0.826667	0.978947	0.924	0.792	0.981191	0.663793	0.85214			33	1	0.995833	1	1	0.993151	0.994924	0.997326	0.987705	1	0.996169	1	1	1	0.996198	0.996923	1
	1550	0.779661	0.666667	0.666667	0.697674	0.669065	0.871465	0.907563	0.742489	0.621622	0.788845	0.507937	0.830508	0.831633	0.744939	0.917864	0.75		0.493671	0.926063	0.715447	0.816901	0.826667	0.981053	0.932	0.808	0.984326	0.681034	0.85214			34	1	0.995833	1	1	0.993151	0.994924	1	0.987705	1	0.996169	1	1	1	0.996198	0.996923	1
	1600	0.788136	0.675556	0.677596	0.709302	0.676259	0.884319	0.907563	0.742489	0.621622	0.804781	0.52381	0.836158	0.831633	0.748988	0.919918	0.758772		0.531646	0.92976	0.731707	0.816901	0.826667	0.983158	0.94	0.824	0.984326	0.698276	0.867704			35	1	0.995833	1	1	0.993151	0.994924	1	0.991803	1	0.996169	1	1	1	0.996198	0.996923	1
	1650	0.788136	0.68	0.688525	0.709302	0.683453	0.902314	0.907563	0.746781	0.630631	0.804781	0.555556	0.844633	0.846939	0.757085	0.926078	0.758772		0.556962	0.92976	0.735772	0.816901	0.833333	0.985263	0.944	0.824	0.984326	0.698276	0.867704			36	1	0.995833	1	1	0.993151	0.994924	1	0.991803	1	0.996169	1	1	1	0.996198	0.996923	1
	1700	0.788136	0.693333	0.699454	0.72093	0.690647	0.910026	0.910364	0.755365	0.63964	0.816733	0.563492	0.853107	0.857143	0.769231	0.932238	0.767544		0.556962	0.935305	0.739837	0.823944	0.846667	0.985263	0.948	0.832	0.990596	0.706897	0.867704			37	1	0.995833	1	1	1	0.997462	1	0.991803	1	0.996169	1	1	1	0.996198	0.998462	1
	1750	0.788136	0.697778	0.710383	0.755814	0.697842	0.917738	0.913165	0.759657	0.657658	0.836653	0.563492	0.861582	0.877551	0.769231	0.932238	0.776316		0.556962	0.939002	0.747967	0.823944	0.86	0.987368	0.952	0.832	0.990596	0.715517	0.867704			38	1	0.995833	1	1	1	0.997462	1	0.991803	1	0.996169	1	1	1	0.996198	0.998462	1
	1800	0.805085	0.711111	0.721311	0.767442	0.705036	0.920308	0.915966	0.763948	0.666667	0.840637	0.587302	0.864407	0.882653	0.777328	0.936345	0.776316		0.594937	0.942699	0.760163	0.830986	0.86	0.987368	0.956	0.832	0.99373	0.724138	0.871595			39	1	0.995833	1	1	1	0.997462	1	0.995902	1	0.996169	1	1	1	1	1	1
	1850	0.838983	0.711111	0.726776	0.767442	0.71223	0.920308	0.921569	0.763948	0.702703	0.844622	0.603175	0.875706	0.887755	0.789474	0.940452	0.785088		0.632911	0.944547	0.772358	0.830986	0.866667	0.987368	0.956	0.848	0.99373	0.741379	0.871595			40	1	0.995833	1	1	1	0.997462	1	0.995902	1	0.996169	1	1	1	1	1	1
	1900	0.847458	0.728889	0.73224	0.767442	0.719424	0.930591	0.932773	0.772532	0.711712	0.85259	0.611111	0.881356	0.892857	0.797571	0.942505	0.79386		0.64557	0.950092	0.788618	0.852113	0.866667	0.987368	0.956	0.856	0.99373	0.741379	0.871595			41	1	0.995833	1	1	1	0.997462	1	0.995902	1	0.996169	1	1	1	1	1	1
	1950	0.847458	0.737778	0.73224	0.767442	0.726619	0.930591	0.932773	0.772532	0.720721	0.856574	0.642857	0.887006	0.892857	0.809717	0.944559	0.798246		0.658228	0.953789	0.804878	0.852113	0.88	0.989474	0.96	0.864	0.99373	0.767241	0.871595			42	1	0.995833	1	1	1	1	1	0.995902	1	0.996169	1	1	1	1	1	1
	2000	0.864407	0.737778	0.748634	0.767442	0.733813	0.935733	0.938375	0.7897	0.72973	0.860558	0.666667	0.898305	0.897959	0.817814	0.950719	0.798246		0.670886	0.955638	0.813008	0.852113	0.88	0.989474	0.964	0.864	0.99373	0.775862	0.879377			43	1	0.995833	1	1	1	1	1	0.995902	1	0.996169	1	1	1	1	1	1
	2050	0.864407	0.737778	0.759563	0.77907	0.76259	0.943445	0.941176	0.793991	0.738739	0.864542	0.666667	0.90113	0.903061	0.825911	0.952772	0.811404		0.670886	0.959335	0.841463	0.873239	0.88	0.989474	0.968	0.888	0.99373	0.775862	0.88716			44	1	0.995833	1	1	1	1	1	0.995902	1	0.996169	1	1	1	1	1	1
	2100	0.872881	0.737778	0.759563	0.790698	0.776978	0.946015	0.943978	0.802575	0.738739	0.868526	0.674603	0.903955	0.908163	0.82996	0.958932	0.815789		0.683544	0.959335	0.853659	0.880282	0.886667	0.989474	0.972	0.912	0.99373	0.793103	0.891051			45	1	0.995833	1	1	1	1	1	0.995902	1	0.996169	1	1	1	1	1	1
	2150	0.872881	0.751111	0.781421	0.790698	0.791367	0.946015	0.946779	0.811159	0.738739	0.880478	0.690476	0.912429	0.928571	0.838057	0.963039	0.824561		0.696203	0.959335	0.861789	0.887324	0.893333	0.989474	0.976	0.912	0.99373	0.793103	0.891051			46	1	0.995833	1	1	1	1	1	0.995902	1	0.996169	1	1	1	1	1	1
	2200	0.881356	0.755556	0.79235	0.802326	0.798561	0.946015	0.946779	0.824034	0.747748	0.880478	0.690476	0.920904	0.928571	0.850202	0.963039	0.828947		0.696203	0.963031	0.865854	0.887324	0.9	0.989474	0.976	0.912	0.99373	0.793103	0.891051			47	1	0.995833	1	1	1	1	1	0.995902	1	0.996169	1	1	1	1	1	1
	2250	0.881356	0.764444	0.808743	0.802326	0.805755	0.953728	0.946779	0.832618	0.756757	0.884462	0.698413	0.923729	0.933673	0.854251	0.965092	0.833333		0.696203	0.96488	0.873984	0.887324	0.9	0.989474	0.98	0.92	0.99373	0.810345	0.894942			48	1	0.995833	1	1	1	1	1	1	1	0.996169	1	1	1	1	1	1
	2300	0.881356	0.764444	0.825137	0.813953	0.820144	0.956298	0.94958	0.832618	0.774775	0.888446	0.698413	0.929379	0.938776	0.8583	0.971253	0.842105		0.721519	0.966728	0.882114	0.887324	0.9	0.991579	0.98	0.928	0.996865	0.810345	0.898833			49	1	0.995833	1	1	1	1	1	1	1	0.996169	1	1	1	1	1	1
	2350	0.881356	0.764444	0.825137	0.825581	0.820144	0.96144	0.952381	0.845494	0.774775	0.896414	0.698413	0.929379	0.94898	0.8583	0.971253	0.846491		0.734177	0.968577	0.882114	0.894366	0.906667	0.991579	0.98	0.928	0.996865	0.818966	0.906615			50	1	0.995833	1	1	1	1	1	1	1	0.996169	1	1	1	1	1	1
	2400	0.881356	0.773333	0.836066	0.837209	0.827338	0.96401	0.955182	0.858369	0.774775	0.900398	0.698413	0.932203	0.94898	0.870445	0.975359	0.850877		0.746835	0.968577	0.886179	0.894366	0.913333	0.991579	0.98	0.928	0.996865	0.818966	0.914397			51	1	0.995833	1	1	1	1	1	1	1	0.996169	1	1	1	1	1	1
	2450	0.898305	0.782222	0.836066	0.860465	0.827338	0.96401	0.960784	0.862661	0.792793	0.900398	0.746032	0.937853	0.94898	0.874494	0.979466	0.850877		0.746835	0.970425	0.886179	0.894366	0.913333	0.991579	0.98	0.928	0.996865	0.836207	0.914397			52	1	0.995833	1	1	1	1	1	1	1	0.996169	1	1	1	1	1	1
	2500	0.898305	0.786667	0.836066	0.860465	0.827338	0.96401	0.960784	0.866953	0.801802	0.908367	0.753968	0.943503	0.94898	0.878543	0.979466	0.859649		0.746835	0.970425	0.890244	0.894366	0.913333	0.991579	0.98	0.928	0.996865	0.853448	0.914397			53	1	0.995833	1	1	1	1	1	1	1	0.996169	1	1	1	1	1	1
	2550	0.90678	0.8	0.836066	0.860465	0.841727	0.966581	0.960784	0.871245	0.801802	0.916335	0.777778	0.946328	0.94898	0.878543	0.983573	0.859649		0.772152	0.970425	0.894309	0.894366	0.913333	0.993684	0.98	0.928	0.996865	0.862069	0.918288			54	1	0.995833	1	1	1	1	1	1	1	0.996169	1	1	1	1	1	1
	2600	0.923729	0.808889	0.836066	0.860465	0.848921	0.966581	0.960784	0.875536	0.801802	0.928287	0.777778	0.946328	0.94898	0.88664	0.983573	0.864035		0.78481	0.972274	0.898374	0.901408	0.926667	0.993684	0.98	0.928	0.996865	0.87069	0.918288			55	1	0.995833	1	1	1	1	1	1	1	0.996169	1	1	1	1	1	1
	2650	0.923729	0.813333	0.84153	0.860465	0.848921	0.974293	0.960784	0.879828	0.81982	0.928287	0.777778	0.949153	0.959184	0.890688	0.983573	0.864035		0.78481	0.972274	0.898374	0.901408	0.933333	0.993684	0.98	0.928	0.996865	0.87069	0.922179			56	1	0.995833	1	1	1	1	1	1	1	0.996169	1	1	1	1	1	1
	2700	0.940678	0.813333	0.84153	0.860465	0.848921	0.974293	0.960784	0.88412	0.828829	0.936255	0.777778	0.949153	0.964286	0.894737	0.983573	0.868421		0.797468	0.974122	0.898374	0.901408	0.94	0.993684	0.98	0.928	0.996865	0.87931	0.92607			57	1	0.995833	1	1	1	1	1	1	1	0.996169	1	1	1	1	1	1
	2750	0.940678	0.813333	0.852459	0.860465	0.848921	0.976864	0.963585	0.88412	0.837838	0.940239	0.809524	0.954802	0.964286	0.898785	0.983573	0.872807		0.797468	0.977819	0.902439	0.901408	0.94	0.993684	0.984	0.928	0.996865	0.87931	0.937743			58	1	0.995833	1	1	1	1	1	1	1	0.996169	1	1	1	1	1	1
	2800	0.940678	0.822222	0.852459	0.860465	0.848921	0.979434	0.963585	0.888412	0.864865	0.940239	0.825397	0.960452	0.969388	0.898785	0.985626	0.881579		0.822785	0.979667	0.906504	0.901408	0.946667	0.993684	0.988	0.936	0.996865	0.887931	0.937743			59	1	0.995833	1	1	1	1	1	1	1	1	1	1	1	1	1	1
	2850	0.949153	0.835556	0.863388	0.860465	0.856115	0.982005	0.966387	0.892704	0.864865	0.940239	0.849206	0.963277	0.97449	0.902834	0.98768	0.890351		0.822785	0.983364	0.910569	0.901408	0.946667	0.993684	0.988	0.952	0.996865	0.896552	0.941634			60	1	0.995833	1	1	1	1	1	1	1	1	1	1	1	1	1	1
	2900	0.957627	0.84	0.863388	0.860465	0.863309	0.982005	0.969188	0.896996	0.864865	0.940239	0.857143	0.966102	0.97449	0.902834	0.989733	0.894737		0.835443	0.983364	0.914634	0.908451	0.946667	0.995789	0.992	0.96	0.996865	0.905172	0.941634			61	1	0.995833	1	1	1	1	1	1	1	1	1	1	1	1	1	1
	2950	0.957627	0.84	0.868852	0.860465	0.870504	0.982005	0.969188	0.901288	0.873874	0.940239	0.857143	0.968927	0.979592	0.91498	0.989733	0.899123		0.835443	0.983364	0.918699	0.908451	0.946667	0.995789	0.992	0.96	0.996865	0.905172	0.941634			62	1	0.995833	1	1	1	1	1	1	1	1	1	1	1	1	1	1
	3000	0.957627	0.84	0.879781	0.860465	0.884892	0.987147	0.97479	0.914163	0.873874	0.940239	0.873016	0.971751	0.984694	0.939271	0.99384	0.903509		0.835443	0.983364	0.922764	0.908451	0.953333	0.995789	0.992	0.96	0.996865	0.905172	0.945525			63	1	0.995833	1	1	1	1	1	1	1	1	1	1	1	1	1	1
	3050	0.957627	0.844444	0.89071	0.872093	0.892086	0.987147	0.97479	0.922747	0.873874	0.940239	0.873016	0.971751	0.984694	0.939271	0.99384	0.903509		0.835443	0.985213	0.926829	0.908451	0.953333	0.995789	0.996	0.968	0.996865	0.905172	0.953307			64	1	0.995833	1	1	1	1	1	1	1	1	1	1	1	1	1	1
	3100	0.957627	0.844444	0.901639	0.872093	0.906475	0.989717	0.97479	0.927039	0.873874	0.944223	0.873016	0.974576	0.989796	0.939271	0.99384	0.907895		0.835443	0.987061	0.930894	0.908451	0.96	0.997895	0.996	0.968	0.996865	0.905172	0.953307			65	1	0.995833	1	1	1	1	1	1	1	1	1	1	1	1	1	1
	3150	0.957627	0.853333	0.907104	0.883721	0.920863	0.989717	0.97479	0.93133	0.882883	0.944223	0.880952	0.977401	0.989796	0.939271	0.995893	0.912281		0.835443	0.988909	0.939024	0.908451	0.96	1	0.996	0.968	0.996865	0.913793	0.957198			66	1	0.995833	1	1	1	1	1	1	1	1	1	1	1	1	1	1
	3200	0.957627	0.857778	0.918033	0.883721	0.920863	0.989717	0.977591	0.93133	0.891892	0.944223	0.888889	0.980226	0.989796	0.939271	0.995893	0.929825		0.860759	0.988909	0.943089	0.922535	0.96	1	0.996	0.968	0.996865	0.922414	0.964981			67	1	0.995833	1	1	1	1	1	1	1	1	1	1	1	1	1	1
	3250	0.957627	0.857778	0.934426	0.883721	0.920863	0.989717	0.977591	0.93133	0.891892	0.952191	0.896825	0.980226	0.989796	0.951417	0.995893	0.934211		0.873418	0.988909	0.947154	0.922535	0.96	1	0.996	0.968	0.996865	0.922414	0.968872			68	1	0.995833	1	1	1	1	1	1	1	1	1	1	1	1	1	1
	3300	0.966102	0.871111	0.939891	0.883721	0.928058	0.989717	0.977591	0.935622	0.891892	0.952191	0.904762	0.980226	0.989796	0.951417	0.995893	0.938596		0.873418	0.988909	0.947154	0.922535	0.96	1	0.996	0.968	0.996865	0.922414	0.968872			69	1	0.995833	1	1	1	1	1	1	1	1	1	1	1	1	1	1
	3350	0.966102	0.875556	0.95082	0.883721	0.928058	0.989717	0.983193	0.939914	0.891892	0.956175	0.920635	0.983051	0.989796	0.951417	0.997947	0.942982		0.873418	0.990758	0.95122	0.922535	0.966667	1	0.996	0.968	0.996865	0.939655	0.968872			70	1	0.995833	1	1	1	1	1	1	1	1	1	1	1	1	1	1
	3400	0.966102	0.88	0.956284	0.883721	0.928058	0.989717	0.983193	0.95279	0.891892	0.960159	0.920635	0.985876	0.989796	0.955466	0.997947	0.942982		0.886076	0.990758	0.955285	0.922535	0.966667	1	0.996	0.992	0.996865	0.948276	0.972763			71	1	0.995833	1	1	1	1	1	1	1	1	1	1	1	1	1	1
	3450	0.966102	0.884444	0.956284	0.883721	0.928058	0.989717	0.983193	0.95279	0.891892	0.960159	0.920635	0.988701	0.989796	0.959514	0.997947	0.947368		0.886076	0.992606	0.955285	0.929577	0.966667	1	0.996	0.992	1	0.948276	0.972763			72	1	0.995833	1	1	1	1	1	1	1	1	1	1	1	1	1	1
	3500	0.966102	0.888889	0.956284	0.883721	0.928058	0.989717	0.983193	0.957082	0.891892	0.960159	0.936508	0.988701	0.994898	0.97166	0.997947	0.947368		0.886076	0.992606	0.95935	0.929577	0.966667	1	0.996	0.992	1	0.956897	0.976654			73	1	0.995833	1	1	1	1	1	1	1	1	1	1	1	1	1	1
	3550	0.966102	0.897778	0.961749	0.906977	0.935252	0.992288	0.983193	0.961373	0.900901	0.960159	0.936508	0.988701	0.994898	0.97166	0.997947	0.947368		0.886076	0.994455	0.96748	0.929577	0.966667	1	0.996	0.992	1	0.956897	0.980545			74	1	0.995833	1	1	1	1	1	1	1	1	1	1	1	1	1	1
	3600	0.974576	0.902222	0.961749	0.906977	0.935252	0.992288	0.983193	0.961373	0.90991	0.972112	0.944444	0.988701	0.994898	0.97166	0.997947	0.95614		0.886076	0.994455	0.96748	0.929577	0.966667	1	0.996	0.992	1	0.956897	0.984436			75	1	0.995833	1	1	1	1	1	1	1	1	1	1	1	1	1	1
	3650	0.974576	0.911111	0.967213	0.906977	0.942446	0.992288	0.983193	0.965665	0.90991	0.972112	0.952381	0.988701	1	0.97166	0.997947	0.960526		0.886076	0.994455	0.96748	0.929577	0.973333	1	0.996	0.992	1	0.965517	0.988327			76	1	0.995833	1	1	1	1	1	1	1	1	1	1	1	1	1	1
	3700	0.974576	0.92	0.967213	0.906977	0.942446	0.994859	0.985994	0.965665	0.918919	0.976096	0.952381	0.988701	1	0.975709	0.997947	0.960526		0.886076	0.994455	0.96748	0.943662	0.973333	1	1	0.992	1	0.965517	0.988327			77	1	0.995833	1	1	1	1	1	1	1	1	1	1	1	1	1	1
	3750	0.983051	0.937778	0.972678	0.906977	0.94964	0.994859	0.985994	0.974249	0.918919	0.984064	0.960317	0.991525	1	0.975709	0.997947	0.960526		0.886076	0.994455	0.96748	0.943662	0.973333	1	1	0.992	1	0.965517	0.988327			78	1	0.995833	1	1	1	1	1	1	1	1	1	1	1	1	1	1
	3800	0.991525	0.946667	0.972678	0.930233	0.956835	0.997429	0.985994	0.978541	0.918919	0.984064	0.960317	0.991525	1	0.975709	0.997947	0.969298		0.898734	0.994455	0.96748	0.943662	0.973333	1	1	0.992	1	0.965517	0.988327			79	1	0.995833	1	1	1	1	1	1	1	1	1	1	1	1	1	1
	3850	0.991525	0.951111	0.972678	0.930233	0.956835	0.997429	0.985994	0.978541	0.918919	0.984064	0.960317	0.991525	1	0.975709	0.997947	0.969298		0.898734	0.994455	0.96748	0.943662	0.973333	1	1	0.992	1	0.965517	0.992218			80	1	0.995833	1	1	1	1	1	1	1	1	1	1	1	1	1	1
	3900	0.991525	0.951111	0.972678	0.930233	0.956835	0.997429	0.988796	0.978541	0.927928	0.984064	0.960317	0.991525	1	0.975709	0.997947	0.969298		0.898734	0.994455	0.96748	0.943662	0.973333	1	1	0.992	1	0.965517	0.992218			81	1	0.995833	1	1	1	1	1	1	1	1	1	1	1	1	1	1
	3950	0.991525	0.951111	0.972678	0.930233	0.956835	0.997429	0.988796	0.982833	0.927928	0.988048	0.968254	0.99435	1	0.983806	0.997947	0.969298		0.898734	0.996303	0.971545	0.943662	0.98	1	1	0.992	1	0.965517	0.992218			82	1	1	1	1	1	1	1	1	1	1	1	1	1	1	1	1
	4000	0.991525	0.955556	0.972678	0.94186	0.956835	0.997429	0.991597	0.982833	0.927928	0.988048	0.97619	0.99435	1	0.983806	0.997947	0.97807		0.898734	0.996303	0.97561	0.943662	0.98	1	1	0.992	1	0.965517	0.992218			83	1	1	1	1	1	1	1	1	1	1	1	1	1	1	1	1
	4050	0.991525	0.96	0.972678	0.94186	0.956835	0.997429	0.991597	0.982833	0.927928	0.992032	0.97619	0.99435	1	0.987854	0.997947	0.97807		0.911392	0.996303	0.979675	0.943662	0.98	1	1	0.992	1	0.965517	0.992218			84	1	1	1	1	1	1	1	1	1	1	1	1	1	1	1	1
	4100	0.991525	0.973333	0.972678	0.94186	0.956835	0.997429	0.994398	0.982833	0.936937	0.992032	0.97619	0.997175	1	0.987854	0.997947	0.982456		0.924051	0.996303	0.98374	0.950704	0.98	1	1	0.992	1	0.982759	0.996109			85	1	1	1	1	1	1	1	1	1	1	1	1	1	1	1	1
	4150	0.991525	0.982222	0.972678	0.94186	0.964029	0.997429	0.994398	0.987124	0.945946	1	0.97619	0.997175	1	0.987854	1	0.982456		0.924051	0.996303	0.98374	0.950704	0.98	1	1	0.992	1	0.982759	0.996109			86	1	1	1	1	1	1	1	1	1	1	1	1	1	1	1	1
	4200	1	0.991111	0.972678	0.953488	0.964029	0.997429	1	0.987124	0.945946	1	0.97619	0.997175	1	0.987854	1	0.982456		0.924051	0.996303	0.99187	0.950704	0.98	1	1	0.992	1	0.991379	0.996109			87	1	1	1	1	1	1	1	1	1	1	1	1	1	1	1	1
	4250	1	0.991111	0.972678	0.965116	0.978417	0.997429	1	0.987124	0.954955	1	0.97619	0.997175	1	0.987854	1	0.986842		0.924051	0.996303	0.99187	0.950704	0.98	1	1	0.992	1	0.991379	0.996109			88	1	1	1	1	1	1	1	1	1	1	1	1	1	1	1	1
	4300	1	0.995556	0.983607	0.965116	0.978417	0.997429	1	0.987124	0.954955	1	0.97619	0.997175	1	0.987854	1	0.986842		0.962025	0.996303	0.995935	0.950704	0.98	1	1	1	1	0.991379	0.996109			89	1	1	1	1	1	1	1	1	1	1	1	1	1	1	1	1
	4350	1	0.995556	0.983607	0.965116	0.978417	0.997429	1	0.987124	0.954955	1	0.984127	1	1	0.991903	1	0.986842		0.962025	0.996303	0.995935	0.950704	0.98	1	1	1	1	0.991379	0.996109			90	1	1	1	1	1	1	1	1	1	1	1	1	1	1	1	1
	4400	1	0.995556	0.989071	0.965116	0.985612	0.997429	1	0.987124	0.981982	1	0.992063	1	1	0.991903	1	0.995614		0.962025	0.996303	0.995935	0.950704	0.986667	1	1	1	1	0.991379	0.996109			91	1	1	1	1	1	1	1	1	1	1	1	1	1	1	1	1
	4450	1	0.995556	0.989071	0.965116	0.992806	0.997429	1	0.991416	0.981982	1	0.992063	1	1	0.995951	1	0.995614		0.962025	0.998152	0.995935	0.950704	0.986667	1	1	1	1	0.991379	0.996109			92	1	1	1	1	1	1	1	1	1	1	1	1	1	1	1	1
	4500	1	0.995556	0.989071	0.976744	0.992806	0.997429	1	0.995708	0.990991	1	0.992063	1	1	1	1	0.995614		0.962025	0.998152	0.995935	0.971831	0.986667	1	1	1	1	0.991379	0.996109			93	1	1	1	1	1	1	1	1	1	1	1	1	1	1	1	1
	4550	1	0.995556	0.994536	0.988372	1	1	1	0.995708	0.990991	1	0.992063	1	1	1	1	0.995614		1	1	1	0.978873	1	1	1	1	1	1	0.996109			94	1	1	1	1	1	1	1	1	1	1	1	1	1	1	1	1
	4600	1	0.995556	1	0.988372	1	1	1	0.995708	1	1	0.992063	1	1	1	1	1		1	1	1	0.992958	1	1	1	1	1	1	1			95	1	1	1	1	1	1	1	1	1	1	1	1	1	1	1	1
	4650	1	1	1	1	1	1	1	1	1	1	1	1	1	1	1	1		1	1	1	1	1	1	1	1	1	1	1			96	1	1	1	1	1	1	1	1	1	1	1	1	1	1	1	1
																																97	1	1	1	1	1	1	1	1	1	1	1	1	1	1	1	1
																																98	1	1	1	1	1	1	1	1	1	1	1	1	1	1	1	1
																																99	1	1	1	1	1	1	1	1	1	1	1	1	1	1	1	1
																																100	1	1	1	1	1	1	1	1	1	1	1	1	1	1	1	1
[truncated: 12 more columns]

## Sheet: Cumulative DG
Frequency								Control																		Cre
	50	0	0	0	0	0	0	0	0	0	0	0	0	0	0	0	0		0	0	0	0	0	0	0	0	0	0	0	0	0	0			Amplitude	Control
	100	0.093023	0.057143	0.219251	0.170385	0.164306	0.156627	0.132075	0.092251	0.102326	0.170124	0.081081	0.169291	0.065868	0.041667	0.179724	0.067485		0.032967	0.093333	0.072072	0.077519	0.086705	0.106383	0.028736	0.096154	0.304348	0.297872	0.066327	0.137931	0.15625	0.193694			4	0	0	0	0	0	0	0	0	0	0	0	0	0	0
	150	0.134884	0.057143	0.272727	0.25355	0.21813	0.186747	0.144654	0.121771	0.130233	0.224066	0.124324	0.216535	0.11976	0.066667	0.207373	0.09816		0.032967	0.106667	0.099099	0.100775	0.127168	0.148936	0.074713	0.096154	0.347826	0.4	0.107143	0.172414	0.1875	0.283784			5	0	0.022727	0.002611	0.01	0.052925	0.005291	0.011299	0	0.052174	0.092308	0	0.007407	0.015957	0
	200	0.167442	0.114286	0.339572	0.310345	0.25779	0.216867	0.188679	0.162362	0.15814	0.273859	0.162162	0.255906	0.137725	0.083333	0.253456	0.122699		0.043956	0.106667	0.126126	0.147287	0.138728	0.170213	0.097701	0.115385	0.434783	0.442553	0.132653	0.206897	0.21875	0.387387			6	0.004444	0.090909	0.02611	0.09	0.21727	0.063492	0.090395	0	0.147826	0.35	0.065327	0.037037	0.117021	0.006897
	250	0.204651	0.171429	0.36631	0.377282	0.314448	0.246988	0.213836	0.202952	0.190698	0.302905	0.194595	0.330709	0.167665	0.116667	0.281106	0.147239		0.054945	0.133333	0.144144	0.178295	0.156069	0.202128	0.103448	0.115385	0.521739	0.497872	0.153061	0.224138	0.239583	0.432432			7	0.048889	0.227273	0.109661	0.276	0.465181	0.190476	0.214689	0.010676	0.352174	0.607692	0.19598	0.140741	0.37234	0.013793
	300	0.237209	0.171429	0.438503	0.423935	0.356941	0.283133	0.232704	0.247232	0.227907	0.327801	0.216216	0.350394	0.203593	0.125	0.313364	0.177914		0.087912	0.173333	0.18018	0.217054	0.17341	0.223404	0.16092	0.134615	0.536232	0.53617	0.193878	0.224138	0.270833	0.472973			8	0.124444	0.431818	0.255875	0.48	0.654596	0.386243	0.355932	0.078292	0.478261	0.753846	0.407035	0.266667	0.606383	0.082759
	350	0.27907	0.171429	0.47861	0.492901	0.416431	0.313253	0.289308	0.280443	0.265116	0.348548	0.243243	0.405512	0.233533	0.166667	0.322581	0.202454		0.10989	0.226667	0.207207	0.255814	0.190751	0.255319	0.195402	0.153846	0.536232	0.561702	0.219388	0.258621	0.3125	0.504505			9	0.32	0.659091	0.422977	0.59	0.771588	0.582011	0.463277	0.202847	0.582609	0.846154	0.572864	0.42963	0.744681	0.268966
	400	0.316279	0.228571	0.508021	0.535497	0.444759	0.337349	0.295597	0.321033	0.311628	0.40249	0.27027	0.433071	0.239521	0.191667	0.354839	0.245399		0.164835	0.24	0.216216	0.27907	0.219653	0.287234	0.229885	0.173077	0.536232	0.6	0.244898	0.275862	0.3125	0.527027			10	0.484444	0.818182	0.582245	0.696	0.866295	0.671958	0.548023	0.323843	0.66087	0.911538	0.738693	0.555556	0.851064	0.37931
	450	0.353488	0.228571	0.553476	0.59432	0.458924	0.373494	0.333333	0.357934	0.339535	0.435685	0.297297	0.464567	0.257485	0.208333	0.382488	0.300613		0.186813	0.253333	0.243243	0.302326	0.236994	0.329787	0.264368	0.173077	0.550725	0.621277	0.27551	0.310345	0.333333	0.563063			11	0.617778	0.909091	0.72846	0.756	0.916435	0.767196	0.627119	0.469751	0.756522	0.95	0.819095	0.640741	0.898936	0.565517
	500	0.362791	0.285714	0.574866	0.62069	0.484419	0.391566	0.339623	0.391144	0.362791	0.443983	0.32973	0.472441	0.257485	0.225	0.387097	0.331288		0.186813	0.266667	0.27027	0.325581	0.260116	0.351064	0.275862	0.211538	0.565217	0.646809	0.316327	0.344828	0.34375	0.585586			12	0.702222	0.931818	0.840731	0.802	0.949861	0.862434	0.666667	0.565836	0.821739	0.973077	0.904523	0.733333	0.93617	0.655172
	550	0.372093	0.314286	0.590909	0.655172	0.518414	0.391566	0.371069	0.416974	0.381395	0.473029	0.367568	0.488189	0.275449	0.225	0.419355	0.343558		0.21978	0.266667	0.306306	0.341085	0.271676	0.37234	0.298851	0.230769	0.57971	0.66383	0.341837	0.344828	0.354167	0.626126			13	0.786667	0.977273	0.906005	0.83	0.963788	0.910053	0.757062	0.633452	0.847826	0.973077	0.929648	0.8	0.941489	0.758621
	600	0.381395	0.314286	0.606952	0.689655	0.555241	0.415663	0.389937	0.431734	0.404651	0.493776	0.383784	0.511811	0.299401	0.258333	0.442396	0.368098		0.241758	0.28	0.333333	0.364341	0.277457	0.393617	0.310345	0.269231	0.57971	0.67234	0.367347	0.362069	0.354167	0.662162			14	0.853333	0.977273	0.94517	0.846	0.97493	0.931217	0.785311	0.697509	0.878261	0.980769	0.934673	0.840741	0.957447	0.834483
	650	0.4	0.314286	0.628342	0.720081	0.586402	0.451807	0.402516	0.450185	0.44186	0.514523	0.416216	0.535433	0.329341	0.291667	0.460829	0.386503		0.263736	0.28	0.36036	0.410853	0.317919	0.414894	0.310345	0.269231	0.594203	0.685106	0.397959	0.396552	0.385417	0.711712			15	0.884444	0.977273	0.97389	0.864	0.988858	0.94709	0.824859	0.740214	0.895652	0.984615	0.969849	0.874074	0.973404	0.889655
	700	0.427907	0.314286	0.644385	0.752535	0.606232	0.463855	0.440252	0.476015	0.465116	0.518672	0.448649	0.547244	0.353293	0.308333	0.493088	0.398773		0.263736	0.32	0.369369	0.434109	0.317919	0.414894	0.333333	0.326923	0.608696	0.702128	0.413265	0.396552	0.40625	0.72973			16	0.906667	0.977273	0.981723	0.888	0.994429	0.962963	0.858757	0.800712	0.908696	0.984615	0.974874	0.896296	0.984043	0.924138
	750	0.437209	0.342857	0.660428	0.78499	0.640227	0.487952	0.465409	0.487085	0.493023	0.543568	0.486486	0.566929	0.389222	0.333333	0.520737	0.423313		0.263736	0.333333	0.405405	0.44186	0.317919	0.446809	0.350575	0.365385	0.608696	0.719149	0.443878	0.396552	0.40625	0.747748			17	0.911111	0.977273	0.994778	0.902	0.994429	0.973545	0.887006	0.83274	0.926087	0.992308	0.979899	0.92963	0.994681	0.931034
	800	0.460465	0.371429	0.681818	0.813387	0.660057	0.518072	0.490566	0.516605	0.497674	0.564315	0.491892	0.602362	0.413174	0.358333	0.525346	0.435583		0.274725	0.346667	0.432432	0.472868	0.33526	0.468085	0.367816	0.403846	0.623188	0.723404	0.469388	0.413793	0.4375	0.765766			18	0.946667	0.977273	0.997389	0.918	0.994429	0.978836	0.915254	0.854093	0.934783	0.996154	0.984925	0.955556	0.994681	0.937931
	850	0.483721	0.4	0.687166	0.833671	0.691218	0.536145	0.503145	0.542435	0.52093	0.576763	0.508108	0.622047	0.443114	0.375	0.557604	0.460123		0.296703	0.373333	0.441441	0.51938	0.346821	0.478723	0.390805	0.423077	0.623188	0.73617	0.510204	0.448276	0.447917	0.788288			19	0.96	0.977273	1	0.924	0.994429	0.984127	0.932203	0.868327	0.952174	0.996154	0.98995	0.962963	0.994681	0.951724
	900	0.493023	0.457143	0.708556	0.837728	0.705382	0.548193	0.528302	0.557196	0.534884	0.59751	0.513514	0.641732	0.467066	0.375	0.576037	0.472393		0.307692	0.413333	0.459459	0.534884	0.369942	0.489362	0.408046	0.423077	0.623188	0.748936	0.556122	0.465517	0.458333	0.806306			20	0.968889	0.977273	1	0.938	0.994429	0.984127	0.966102	0.879004	0.952174	1	0.98995	0.981481	1	0.965517
	950	0.502326	0.514286	0.721925	0.845842	0.713881	0.566265	0.540881	0.575646	0.562791	0.626556	0.518919	0.669291	0.508982	0.391667	0.59447	0.478528		0.318681	0.413333	0.477477	0.55814	0.393064	0.5	0.425287	0.423077	0.623188	0.757447	0.576531	0.465517	0.46875	0.81982			21	0.968889	0.977273	1	0.942	0.994429	0.984127	0.971751	0.882562	0.96087	1	0.994975	0.988889	1	0.972414
	1000	0.52093	0.514286	0.751337	0.851927	0.725212	0.596386	0.559748	0.601476	0.576744	0.639004	0.540541	0.685039	0.51497	0.408333	0.617512	0.478528		0.318681	0.426667	0.486486	0.573643	0.398844	0.521277	0.45977	0.423077	0.637681	0.761702	0.602041	0.482759	0.510417	0.837838			22	0.973333	0.977273	1	0.944	0.997214	0.989418	0.988701	0.911032	0.965217	1	0.994975	0.988889	1	0.97931
	1050	0.539535	0.514286	0.764706	0.864097	0.747875	0.596386	0.566038	0.627306	0.595349	0.647303	0.562162	0.716535	0.538922	0.416667	0.635945	0.484663		0.340659	0.44	0.504505	0.589147	0.410405	0.531915	0.465517	0.480769	0.652174	0.778723	0.612245	0.482759	0.520833	0.846847			23	0.982222	0.977273	1	0.95	1	0.989418	0.988701	0.928826	0.978261	1	1	0.992593	1	0.97931
	1100	0.567442	0.514286	0.778075	0.874239	0.76204	0.60241	0.591195	0.642066	0.609302	0.688797	0.578378	0.728346	0.538922	0.416667	0.663594	0.515337		0.351648	0.453333	0.531532	0.596899	0.445087	0.531915	0.5	0.480769	0.652174	0.791489	0.627551	0.482759	0.53125	0.869369			24	0.982222	0.977273	1	0.96	1	0.994709	0.988701	0.932384	0.982609	1	1	0.992593	1	0.97931
	1150	0.586047	0.542857	0.791444	0.888438	0.770538	0.614458	0.610063	0.660517	0.623256	0.701245	0.605405	0.748031	0.550898	0.416667	0.677419	0.539877		0.362637	0.466667	0.531532	0.604651	0.456647	0.542553	0.505747	0.480769	0.652174	0.804255	0.632653	0.5	0.53125	0.887387			25	0.991111	0.977273	1	0.964	1	0.994709	1	0.939502	0.986957	1	1	0.992593	1	0.986207
	1200	0.613953	0.571429	0.794118	0.904665	0.78187	0.626506	0.622642	0.667897	0.646512	0.709544	0.605405	0.751969	0.562874	0.441667	0.686636	0.546012		0.406593	0.48	0.540541	0.627907	0.485549	0.56383	0.511494	0.480769	0.652174	0.817021	0.647959	0.517241	0.552083	0.905405			26	0.991111	0.977273	1	0.968	1	0.994709	1	0.946619	0.986957	1	1	0.992593	1	0.986207
	1250	0.632558	0.571429	0.802139	0.906694	0.796034	0.638554	0.63522	0.686347	0.655814	0.73029	0.610811	0.759843	0.57485	0.458333	0.695853	0.552147		0.406593	0.493333	0.540541	0.651163	0.520231	0.56383	0.522989	0.5	0.666667	0.821277	0.658163	0.517241	0.552083	0.90991			27	0.995556	0.977273	1	0.974	1	0.994709	1	0.950178	0.995652	1	1	0.996296	1	0.986207
	1300	0.651163	0.571429	0.815508	0.914807	0.807365	0.644578	0.63522	0.701107	0.669767	0.759336	0.621622	0.771654	0.592814	0.475	0.695853	0.558282		0.417582	0.506667	0.567568	0.666667	0.531792	0.574468	0.551724	0.519231	0.666667	0.825532	0.673469	0.517241	0.5625	0.927928			28	1	0.977273	1	0.978	1	0.994709	1	0.953737	1	1	1	1	1	0.986207
	1350	0.669767	0.6	0.826203	0.924949	0.813031	0.644578	0.647799	0.712177	0.693023	0.763485	0.627027	0.775591	0.610778	0.491667	0.695853	0.570552		0.417582	0.52	0.567568	0.682171	0.543353	0.606383	0.574713	0.538462	0.666667	0.838298	0.678571	0.534483	0.59375	0.927928			29	1	0.977273	1	0.978	1	0.994709	1	0.960854	1	1	1	1	1	0.986207
	1400	0.693023	0.6	0.834225	0.935091	0.815864	0.662651	0.666667	0.730627	0.697674	0.767635	0.643243	0.783465	0.616766	0.5	0.700461	0.582822		0.43956	0.52	0.594595	0.697674	0.572254	0.617021	0.574713	0.538462	0.681159	0.842553	0.683673	0.551724	0.614583	0.927928			30	1	0.977273	1	0.978	1	1	1	0.964413	1	1	1	1	1	0.986207
	1450	0.702326	0.6	0.84492	0.941176	0.824363	0.662651	0.691824	0.756458	0.711628	0.780083	0.654054	0.795276	0.640719	0.5	0.705069	0.595092		0.461538	0.533333	0.594595	0.705426	0.595376	0.62766	0.591954	0.557692	0.681159	0.846809	0.709184	0.551724	0.645833	0.932432			31	1	1	1	0.98	1	1	1	0.964413	1	1	1	1	1	0.986207
	1500	0.725581	0.6	0.852941	0.947262	0.830028	0.668675	0.698113	0.771218	0.72093	0.784232	0.659459	0.80315	0.646707	0.5	0.732719	0.595092		0.461538	0.546667	0.621622	0.72093	0.612717	0.648936	0.614943	0.557692	0.681159	0.855319	0.719388	0.551724	0.666667	0.932432			32	1	1	1	0.984	1	1	1	0.964413	1	1	1	1	1	0.993103
	1550	0.730233	0.628571	0.871658	0.94929	0.84136	0.680723	0.704403	0.797048	0.72093	0.784232	0.67027	0.807087	0.658683	0.525	0.746544	0.619632		0.494505	0.546667	0.63964	0.728682	0.624277	0.659574	0.643678	0.557692	0.681159	0.868085	0.72449	0.551724	0.677083	0.936937			33	1	1	1	0.986	1	1	1	0.97153	1	1	1	1	1	0.993103
	1600	0.753488	0.628571	0.874332	0.955375	0.847025	0.686747	0.716981	0.797048	0.725581	0.80083	0.691892	0.811024	0.664671	0.533333	0.769585	0.638037		0.494505	0.6	0.648649	0.744186	0.65896	0.659574	0.655172	0.576923	0.681159	0.876596	0.734694	0.568966	0.6875	0.941441			34	1	1	1	0.988	1	1	1	0.97153	1	1	1	1	1	0.993103
	1650	0.75814	0.628571	0.877005	0.957404	0.849858	0.692771	0.735849	0.804428	0.734884	0.80083	0.708108	0.826772	0.694611	0.558333	0.778802	0.650307		0.494505	0.6	0.648649	0.75969	0.67052	0.680851	0.678161	0.596154	0.681159	0.885106	0.755102	0.568966	0.708333	0.945946			35	1	1	1	0.99	1	1	1	0.97153	1	1	1	1	1	0.993103
	1700	0.772093	0.628571	0.893048	0.959432	0.855524	0.710843	0.742138	0.822878	0.734884	0.809129	0.718919	0.834646	0.700599	0.558333	0.788018	0.668712		0.494505	0.6	0.648649	0.767442	0.687861	0.680851	0.689655	0.615385	0.695652	0.889362	0.760204	0.586207	0.71875	0.954955			36	1	1	1	0.992	1	1	1	0.97153	1	1	1	1	1	0.993103
	1750	0.776744	0.628571	0.90107	0.971602	0.858357	0.728916	0.742138	0.845018	0.739535	0.821577	0.72973	0.850394	0.700599	0.566667	0.792627	0.687117		0.505495	0.6	0.666667	0.775194	0.693642	0.691489	0.695402	0.615385	0.695652	0.889362	0.765306	0.586207	0.729167	0.954955			37	1	1	1	0.994	1	1	1	0.97153	1	1	1	1	1	0.993103
	1800	0.786047	0.657143	0.909091	0.971602	0.866856	0.728916	0.742138	0.852399	0.744186	0.829876	0.72973	0.850394	0.706587	0.591667	0.801843	0.693252		0.549451	0.64	0.684685	0.782946	0.693642	0.691489	0.695402	0.615385	0.695652	0.893617	0.77551	0.586207	0.729167	0.959459			38	1	1	1	0.996	1	1	1	0.975089	1	1	1	1	1	0.993103
	1850	0.795349	0.657143	0.917112	0.975659	0.875354	0.73494	0.748428	0.859779	0.762791	0.834025	0.745946	0.854331	0.718563	0.591667	0.806452	0.699387		0.56044	0.64	0.693694	0.790698	0.699422	0.723404	0.712644	0.615385	0.695652	0.902128	0.785714	0.62069	0.729167	0.959459			39	1	1	1	0.998	1	1	1	0.978648	1	1	1	1	1	0.993103
	1900	0.8	0.657143	0.930481	0.979716	0.88102	0.746988	0.754717	0.863469	0.781395	0.838174	0.745946	0.854331	0.724551	0.591667	0.815668	0.705521		0.593407	0.64	0.693694	0.79845	0.705202	0.723404	0.724138	0.653846	0.710145	0.906383	0.790816	0.655172	0.75	0.959459			40	1	1	1	1	1	1	1	0.982206	1	1	1	1	1	0.993103
	1950	0.813953	0.657143	0.933155	0.981744	0.886686	0.746988	0.754717	0.867159	0.781395	0.854772	0.756757	0.854331	0.742515	0.625	0.815668	0.717791		0.593407	0.666667	0.702703	0.821705	0.710983	0.734043	0.735632	0.653846	0.710145	0.910638	0.80102	0.672414	0.760417	0.959459			41	1	1	1	1	1	1	1	0.982206	1	1	1	1	1	0.993103
	2000	0.813953	0.657143	0.935829	0.983773	0.895184	0.753012	0.761006	0.874539	0.786047	0.863071	0.762162	0.854331	0.754491	0.65	0.815668	0.754601		0.593407	0.68	0.702703	0.821705	0.734104	0.734043	0.758621	0.673077	0.710145	0.92766	0.80102	0.672414	0.760417	0.959459			42	1	1	1	1	1	1	1	0.982206	1	1	1	1	1	0.993103
	2050	0.823256	0.657143	0.938503	0.983773	0.898017	0.753012	0.767296	0.885609	0.8	0.86722	0.778378	0.858268	0.760479	0.683333	0.83871	0.760736		0.615385	0.68	0.720721	0.829457	0.751445	0.734043	0.770115	0.673077	0.710145	0.931915	0.80102	0.672414	0.770833	0.959459			43	1	1	1	1	1	1	1	0.985765	1	1	1	1	1	0.993103
	2100	0.832558	0.657143	0.94385	0.983773	0.909348	0.759036	0.779874	0.885609	0.813953	0.871369	0.778378	0.866142	0.766467	0.708333	0.847926	0.773006		0.626374	0.693333	0.738739	0.844961	0.757225	0.755319	0.770115	0.673077	0.710145	0.93617	0.811224	0.706897	0.78125	0.959459			44	1	1	1	1	1	1	1	0.985765	1	1	1	1	1	0.993103
	2150	0.837209	0.657143	0.94385	0.983773	0.912181	0.789157	0.792453	0.892989	0.823256	0.875519	0.8	0.866142	0.784431	0.708333	0.861751	0.779141		0.626374	0.706667	0.747748	0.844961	0.774566	0.755319	0.781609	0.673077	0.724638	0.93617	0.811224	0.741379	0.78125	0.959459			45	1	1	1	1	1	1	1	0.985765	1	1	1	1	1	0.993103
	2200	0.846512	0.657143	0.94385	0.983773	0.915014	0.795181	0.81761	0.904059	0.832558	0.875519	0.8	0.870079	0.784431	0.716667	0.861751	0.779141		0.67033	0.746667	0.756757	0.868217	0.786127	0.755319	0.798851	0.692308	0.73913	0.93617	0.816327	0.758621	0.791667	0.959459			46	1	1	1	1	1	1	1	0.985765	1	1	1	1	1	0.993103
	2250	0.846512	0.657143	0.94385	0.983773	0.917847	0.801205	0.823899	0.911439	0.84186	0.879668	0.816216	0.877953	0.790419	0.716667	0.866359	0.779141		0.67033	0.746667	0.756757	0.868217	0.797688	0.765957	0.804598	0.692308	0.73913	0.93617	0.821429	0.775862	0.791667	0.963964			47	1	1	1	1	1	1	1	0.985765	1	1	1	1	1	0.993103
	2300	0.851163	0.657143	0.951872	0.985801	0.92068	0.813253	0.830189	0.918819	0.865116	0.883817	0.816216	0.885827	0.802395	0.741667	0.875576	0.803681		0.681319	0.773333	0.774775	0.875969	0.797688	0.797872	0.810345	0.692308	0.73913	0.940426	0.826531	0.793103	0.791667	0.968468			48	1	1	1	1	1	1	1	0.985765	1	1	1	1	1	0.993103
	2350	0.851163	0.685714	0.951872	0.985801	0.926346	0.813253	0.830189	0.922509	0.865116	0.892116	0.816216	0.893701	0.820359	0.741667	0.875576	0.815951		0.681319	0.786667	0.792793	0.875969	0.797688	0.797872	0.816092	0.711538	0.73913	0.944681	0.836735	0.793103	0.8125	0.968468			49	1	1	1	1	1	1	1	0.985765	1	1	1	1	1	0.993103
	2400	0.860465	0.685714	0.951872	0.98783	0.932011	0.813253	0.849057	0.922509	0.874419	0.892116	0.816216	0.897638	0.838323	0.758333	0.875576	0.822086		0.681319	0.8	0.801802	0.875969	0.809249	0.819149	0.821839	0.711538	0.753623	0.948936	0.836735	0.793103	0.8125	0.972973			50	1	1	1	1	1	1	1	0.985765	1	1	1	1	1	1
	2450	0.865116	0.742857	0.951872	0.991886	0.937677	0.825301	0.855346	0.922509	0.87907	0.896266	0.816216	0.905512	0.838323	0.758333	0.875576	0.822086		0.703297	0.8	0.810811	0.883721	0.820809	0.819149	0.827586	0.730769	0.782609	0.948936	0.836735	0.793103	0.8125	0.972973			51	1	1	1	1	1	1	1	0.985765	1	1	1	1	1	1
	2500	0.869767	0.742857	0.951872	0.991886	0.949008	0.825301	0.855346	0.929889	0.87907	0.904564	0.832432	0.909449	0.850299	0.758333	0.880184	0.822086		0.714286	0.8	0.81982	0.883721	0.83237	0.819149	0.827586	0.730769	0.811594	0.953191	0.857143	0.793103	0.822917	0.972973			52	1	1	1	1	1	1	1	0.985765	1	1	1	1	1	1
	2550	0.874419	0.742857	0.951872	0.993915	0.954674	0.831325	0.855346	0.937269	0.888372	0.912863	0.832432	0.913386	0.856287	0.758333	0.889401	0.828221		0.725275	0.813333	0.837838	0.899225	0.83815	0.819149	0.827586	0.730769	0.826087	0.957447	0.867347	0.810345	0.822917	0.972973			53	1	1	1	1	1	1	1	0.985765	1	1	1	1	1	1
	2600	0.888372	0.771429	0.951872	0.993915	0.954674	0.837349	0.861635	0.944649	0.888372	0.921162	0.843243	0.917323	0.868263	0.775	0.889401	0.834356		0.725275	0.813333	0.837838	0.906977	0.843931	0.829787	0.83908	0.730769	0.826087	0.957447	0.872449	0.810345	0.833333	0.977477			54	1	1	1	1	1	1	1	0.992883	1	1	1	1	1	1
	2650	0.888372	0.771429	0.957219	0.993915	0.957507	0.843373	0.867925	0.95203	0.893023	0.929461	0.848649	0.925197	0.88024	0.775	0.903226	0.834356		0.725275	0.826667	0.855856	0.914729	0.855491	0.840426	0.83908	0.730769	0.826087	0.957447	0.877551	0.810345	0.854167	0.981982			55	1	1	1	1	1	1	1	0.992883	1	1	1	1	1	1
	2700	0.888372	0.8	0.957219	0.993915	0.96034	0.849398	0.874214	0.95572	0.897674	0.93361	0.864865	0.929134	0.892216	0.783333	0.907834	0.840491		0.736264	0.826667	0.855856	0.914729	0.861272	0.851064	0.850575	0.730769	0.84058	0.957447	0.877551	0.810345	0.885417	0.981982			56	1	1	1	1	1	1	1	0.996441	1	1	1	1	1	1
	2750	0.893023	0.8	0.957219	0.993915	0.966006	0.849398	0.874214	0.95572	0.902326	0.93361	0.875676	0.933071	0.892216	0.8	0.917051	0.846626		0.747253	0.84	0.855856	0.922481	0.867052	0.851064	0.867816	0.75	0.855072	0.957447	0.877551	0.810345	0.885417	0.986486			57	1	1	1	1	1	1	1	0.996441	1	1	1	1	1	1
	2800	0.893023	0.8	0.962567	0.993915	0.968839	0.855422	0.880503	0.95941	0.906977	0.93361	0.881081	0.937008	0.898204	0.8	0.917051	0.846626		0.758242	0.84	0.864865	0.922481	0.878613	0.861702	0.885057	0.75	0.855072	0.957447	0.892857	0.810345	0.885417	0.986486			58	1	1	1	1	1	1	1	0.996441	1	1	1	1	1	1
	2850	0.902326	0.8	0.965241	0.993915	0.971671	0.855422	0.886792	0.9631	0.906977	0.93361	0.897297	0.937008	0.898204	0.808333	0.917051	0.846626		0.758242	0.853333	0.864865	0.922481	0.884393	0.861702	0.890805	0.769231	0.869565	0.957447	0.892857	0.810345	0.885417	0.990991			59	1	1	1	1	1	1	1	1	1	1	1	1	1	1
	2900	0.902326	0.8	0.965241	0.993915	0.971671	0.861446	0.893082	0.9631	0.92093	0.93361	0.897297	0.937008	0.898204	0.808333	0.926267	0.858896		0.769231	0.853333	0.864865	0.930233	0.884393	0.87234	0.890805	0.769231	0.869565	0.957447	0.892857	0.844828	0.895833	0.990991			60	1	1	1	1	1	1	1	1	1	1	1	1	1	1
	2950	0.902326	0.8	0.965241	0.993915	0.977337	0.861446	0.893082	0.96679	0.925581	0.937759	0.902703	0.940945	0.904192	0.833333	0.926267	0.871166		0.769231	0.866667	0.864865	0.937984	0.884393	0.87234	0.896552	0.769231	0.869565	0.957447	0.897959	0.844828	0.90625	0.990991			61	1	1	1	1	1	1	1	1	1	1	1	1	1	1
	3000	0.906977	0.8	0.967914	0.995943	0.977337	0.861446	0.899371	0.96679	0.930233	0.937759	0.913514	0.940945	0.91018	0.833333	0.930876	0.871166		0.78022	0.866667	0.873874	0.953488	0.884393	0.87234	0.896552	0.769231	0.869565	0.957447	0.897959	0.844828	0.916667	0.995495			62	1	1	1	1	1	1	1	1	1	1	1	1	1	1
	3050	0.906977	0.8	0.967914	0.995943	0.98017	0.86747	0.90566	0.97048	0.930233	0.937759	0.913514	0.948819	0.91018	0.833333	0.930876	0.883436		0.78022	0.866667	0.90991	0.96124	0.884393	0.87234	0.902299	0.769231	0.869565	0.957447	0.908163	0.87931	0.927083	0.995495			63	1	1	1	1	1	1	1	1	1	1	1	1	1	1
	3100	0.911628	0.8	0.970588	0.997972	0.98017	0.873494	0.90566	0.97048	0.934884	0.941909	0.918919	0.948819	0.91018	0.833333	0.935484	0.883436		0.791209	0.866667	0.90991	0.96124	0.890173	0.87234	0.91954	0.788462	0.869565	0.961702	0.918367	0.87931	0.927083	0.995495			64	1	1	1	1	1	1	1	1	1	1	1	1	1	1
	3150	0.916279	0.8	0.973262	0.997972	0.983003	0.885542	0.90566	0.97417	0.939535	0.941909	0.918919	0.948819	0.91018	0.841667	0.940092	0.895706		0.791209	0.893333	0.90991	0.96124	0.890173	0.882979	0.91954	0.788462	0.884058	0.961702	0.928571	0.87931	0.927083	0.995495			65	1	1	1	1	1	1	1	1	1	1	1	1	1	1
	3200	0.916279	0.828571	0.981283	0.997972	0.983003	0.891566	0.918239	0.97786	0.944186	0.941909	0.918919	0.948819	0.91018	0.841667	0.9447	0.907975		0.791209	0.906667	0.90991	0.968992	0.890173	0.882979	0.91954	0.826923	0.884058	0.961702	0.928571	0.87931	0.927083	0.995495			66	1	1	1	1	1	1	1	1	1	1	1	1	1	1
	3250	0.92093	0.828571	0.983957	0.997972	0.983003	0.89759	0.918239	0.97786	0.948837	0.946058	0.924324	0.956693	0.916168	0.858333	0.949309	0.907975		0.802198	0.906667	0.918919	0.968992	0.890173	0.904255	0.925287	0.846154	0.884058	0.961702	0.928571	0.87931	0.927083	0.995495			67	1	1	1	1	1	1	1	1	1	1	1	1	1	1
	3300	0.925581	0.828571	0.983957	0.997972	0.985836	0.89759	0.924528	0.97786	0.95814	0.950207	0.924324	0.956693	0.916168	0.858333	0.953917	0.91411		0.802198	0.906667	0.927928	0.968992	0.890173	0.914894	0.931034	0.865385	0.884058	0.961702	0.933673	0.87931	0.9375	0.995495			68	1	1	1	1	1	1	1	1	1	1	1	1	1	1
	3350	0.930233	0.828571	0.983957	0.997972	0.985836	0.909639	0.924528	0.97786	0.95814	0.950207	0.92973	0.956693	0.922156	0.866667	0.953917	0.920245		0.813187	0.906667	0.927928	0.968992	0.895954	0.914894	0.936782	0.884615	0.884058	0.961702	0.933673	0.896552	0.947917	0.995495			69	1	1	1	1	1	1	1	1	1	1	1	1	1	1
	3400	0.939535	0.857143	0.983957	0.997972	0.991501	0.909639	0.924528	0.98155	0.95814	0.954357	0.935135	0.956693	0.928144	0.875	0.958525	0.92638		0.824176	0.906667	0.927928	0.976744	0.907514	0.914894	0.936782	0.884615	0.884058	0.961702	0.938776	0.896552	0.947917	0.995495			70	1	1	1	1	1	1	1	1	1	1	1	1	1	1
	3450	0.948837	0.857143	0.986631	0.997972	0.991501	0.915663	0.924528	0.98155	0.95814	0.954357	0.935135	0.96063	0.946108	0.875	0.958525	0.932515		0.824176	0.92	0.927928	0.976744	0.907514	0.925532	0.936782	0.884615	0.884058	0.970213	0.938776	0.896552	0.958333	0.995495			71	1	1	1	1	1	1	1	1	1	1	1	1	1	1
	3500	0.948837	0.857143	0.986631	0.997972	0.994334	0.921687	0.924528	0.98524	0.962791	0.954357	0.935135	0.96063	0.952096	0.875	0.958525	0.93865		0.846154	0.933333	0.927928	0.984496	0.907514	0.925532	0.936782	0.884615	0.884058	0.970213	0.938776	0.896552	0.958333	0.995495			72	1	1	1	1	1	1	1	1	1	1	1	1	1	1
	3550	0.948837	0.857143	0.986631	1	0.994334	0.933735	0.930818	0.98524	0.967442	0.958506	0.935135	0.96063	0.958084	0.883333	0.958525	0.95092		0.846154	0.933333	0.927928	0.984496	0.913295	0.925532	0.942529	0.903846	0.898551	0.970213	0.94898	0.913793	0.958333	0.995495			73	1	1	1	1	1	1	1	1	1	1	1	1	1	1
	3600	0.95814	0.857143	0.986631	1	0.994334	0.933735	0.937107	0.98524	0.967442	0.958506	0.935135	0.964567	0.976048	0.891667	0.958525	0.95092		0.857143	0.933333	0.927928	0.984496	0.919075	0.925532	0.948276	0.923077	0.913043	0.970213	0.954082	0.913793	0.958333	0.995495			74	1	1	1	1	1	1	1	1	1	1	1	1	1	1
	3650	0.95814	0.857143	0.986631	1	0.994334	0.933735	0.937107	0.98524	0.967442	0.966805	0.935135	0.968504	0.976048	0.9	0.958525	0.95092		0.868132	0.946667	0.954955	0.984496	0.924855	0.93617	0.948276	0.923077	0.913043	0.974468	0.954082	0.948276	0.96875	0.995495			75	1	1	1	1	1	1	1	1	1	1	1	1	1	1
	3700	0.95814	0.885714	0.986631	1	0.994334	0.945783	0.937107	0.98893	0.972093	0.966805	0.935135	0.968504	0.976048	0.908333	0.958525	0.95092		0.879121	0.96	0.954955	0.984496	0.924855	0.93617	0.948276	0.923077	0.913043	0.974468	0.954082	0.948276	0.96875	0.995495			76	1	1	1	1	1	1	1	1	1	1	1	1	1	1
	3750	0.95814	0.885714	0.986631	1	0.994334	0.951807	0.937107	0.98893	0.972093	0.966805	0.956757	0.972441	0.976048	0.908333	0.958525	0.95092		0.901099	0.96	0.954955	0.984496	0.924855	0.93617	0.948276	0.923077	0.913043	0.978723	0.954082	0.948276	0.96875	0.995495			77	1	1	1	1	1	1	1	1	1	1	1	1	1	1
	3800	0.962791	0.885714	0.986631	1	0.994334	0.951807	0.937107	0.98893	0.972093	0.966805	0.956757	0.976378	0.976048	0.908333	0.963134	0.957055		0.901099	0.96	0.954955	0.984496	0.924855	0.93617	0.948276	0.923077	0.913043	0.982979	0.954082	0.948276	0.96875	0.995495			78	1	1	1	1	1	1	1	1	1	1	1	1	1	1
	3850	0.962791	0.885714	0.986631	1	1	0.96988	0.937107	0.99262	0.972093	0.970954	0.967568	0.976378	0.976048	0.908333	0.967742	0.96319		0.923077	0.96	0.954955	0.984496	0.930636	0.93617	0.95977	0.942308	0.942029	0.982979	0.959184	0.948276	0.979167	0.995495			79	1	1	1	1	1	1	1	1	1	1	1	1	1	1
	3900	0.962791	0.885714	0.989305	1	1	0.96988	0.937107	0.99262	0.976744	0.970954	0.967568	0.980315	0.976048	0.908333	0.967742	0.96319		0.934066	0.96	0.954955	0.984496	0.936416	0.946809	0.95977	0.942308	0.956522	0.982979	0.959184	0.948276	0.979167	0.995495			80	1	1	1	1	1	1	1	1	1	1	1	1	1	1
	3950	0.967442	0.914286	0.991979	1	1	0.96988	0.943396	0.99262	0.976744	0.970954	0.967568	0.984252	0.976048	0.925	0.97235	0.969325		0.934066	0.96	0.963964	0.984496	0.936416	0.957447	0.95977	0.942308	0.985507	0.982979	0.964286	0.965517	0.979167	0.995495			81	1	1	1	1	1	1	1	1	1	1	1	1	1	1
	4000	0.972093	0.914286	0.991979	1	1	0.96988	0.949686	0.99631	0.981395	0.979253	0.972973	0.984252	0.976048	0.925	0.97235	0.97546		0.934066	0.96	0.963964	0.984496	0.936416	0.968085	0.965517	0.942308	0.985507	0.987234	0.969388	0.965517	0.979167	1			82	1	1	1	1	1	1	1	1	1	1	1	1	1	1
	4050	0.976744	0.914286	0.994652	1	1	0.96988	0.962264	0.99631	0.981395	0.979253	0.978378	0.988189	0.976048	0.933333	0.97235	0.981595		0.945055	0.96	0.972973	0.984496	0.947977	0.968085	0.965517	0.942308	0.985507	0.987234	0.969388	0.965517	0.979167	1			83	1	1	1	1	1	1	1	1	1	1	1	1	1	1
	4100	0.976744	0.914286	0.994652	1	1	0.96988	0.968553	0.99631	0.981395	0.979253	0.978378	0.988189	0.976048	0.933333	0.97235	0.981595		0.956044	0.96	0.990991	0.992248	0.947977	0.968085	0.977011	0.942308	0.985507	0.987234	0.969388	0.965517	0.979167	1			84	1	1	1	1	1	1	1	1	1	1	1	1	1	1
	4150	0.976744	0.914286	0.994652	1	1	0.975904	0.968553	0.99631	0.986047	0.979253	0.978378	0.988189	0.976048	0.941667	0.97235	0.981595		0.967033	0.96	0.990991	0.992248	0.953757	0.978723	0.977011	0.942308	0.985507	0.987234	0.97449	0.965517	0.979167	1			85	1	1	1	1	1	1	1	1	1	1	1	1	1	1
	4200	0.976744	0.914286	0.994652	1	1	0.981928	0.968553	0.99631	0.990698	0.983402	0.978378	0.988189	0.976048	0.95	0.976959	0.981595		0.967033	0.96	0.990991	0.992248	0.959538	0.978723	0.977011	0.942308	0.985507	0.987234	0.984694	0.965517	0.979167	1			86	1	1	1	1	1	1	1	1	1	1	1	1	1	1
	4250	0.976744	0.942857	0.997326	1	1	0.981928	0.974843	0.99631	0.995349	0.987552	0.978378	0.988189	0.982036	0.95	0.976959	0.981595		0.978022	0.96	1	0.992248	0.976879	0.978723	0.977011	0.961538	0.985507	0.987234	0.989796	0.965517	0.989583	1			87	1	1	1	1	1	1	1	1	1	1	1	1	1	1
	4300	0.976744	0.971429	0.997326	1	1	0.981928	0.981132	0.99631	0.995349	0.987552	0.978378	0.988189	0.982036	0.958333	0.976959	0.98773		0.978022	0.96	1	0.992248	0.976879	0.978723	0.977011	0.980769	0.985507	0.987234	0.989796	0.965517	0.989583	1			88	1	1	1	1	1	1	1	1	1	1	1	1	1	1
	4350	0.976744	0.971429	1	1	1	0.981928	0.987421	0.99631	0.995349	0.991701	0.994595	0.988189	0.982036	0.958333	0.981567	0.993865		0.978022	0.986667	1	0.992248	0.976879	0.978723	0.982759	0.980769	0.985507	0.991489	1	0.965517	0.989583	1			89	1	1	1	1	1	1	1	1	1	1	1	1	1	1
	4400	0.976744	0.971429	1	1	1	0.981928	0.987421	0.99631	0.995349	0.995851	0.994595	0.992126	0.988024	0.966667	0.981567	0.993865		0.989011	0.986667	1	0.992248	0.982659	0.978723	0.982759	0.980769	0.985507	0.991489	1	0.965517	0.989583	1			90	1	1	1	1	1	1	1	1	1	1	1	1	1	1
	4450	0.976744	1	1	1	1	0.981928	0.987421	0.99631	0.995349	0.995851	1	0.996063	0.994012	0.966667	0.986175	0.993865		0.989011	1	1	0.992248	0.988439	0.978723	0.982759	0.980769	0.985507	0.991489	1	0.982759	0.989583	1			91	1	1	1	1	1	1	1	1	1	1	1	1	1	1
	4500	0.981395	1	1	1	1	0.987952	0.987421	1	1	0.995851	1	0.996063	1	0.975	0.986175	1		0.989011	1	1	0.992248	0.988439	0.978723	0.988506	1	0.985507	0.995745	1	0.982759	0.989583	1			92	1	1	1	1	1	1	1	1	1	1	1	1	1	1
	4550	0.990698	1	1	1	1	0.993976	0.987421	1	1	0.995851	1	0.996063	1	0.983333	0.986175	1		0.989011	1	1	0.992248	0.99422	0.978723	0.994253	1	0.985507	0.995745	1	1	1	1			93	1	1	1	1	1	1	1	1	1	1	1	1	1	1
	4600	0.990698	1	1	1	1	0.993976	0.987421	1	1	0.995851	1	1	1	0.991667	0.986175	1		1	1	1	1	0.99422	0.989362	0.994253	1	1	0.995745	1	1	1	1			94	1	1	1	1	1	1	1	1	1	1	1	1	1	1
	4650	1	1	1	1	1	1	1	1	1	1	1	1	1	1	1	1		1	1	1	1	1	1	1	1	1	1	1	1	1	1			95	1	1	1	1	1	1	1	1	1	1	1	1	1	1
																																			96	1	1	1	1	1	1	1	1	1	1	1	1	1	1
																																			97	1	1	1	1	1	1	1	1	1	1	1	1	1	1
																																			98	1	1	1	1	1	1	1	1	1	1	1	1	1	1
																																			99	1	1	1	1	1	1	1	1	1	1	1	1	1	1
																																			100	1	1	1	1	1	1	1	1	1	1	1	1	1	1
[truncated: 16 more columns]
