# Supplementary material for: Distinct but overlapping roles of LRRTM1 and LRRTM2 in developing and mature hippocampal circuits
Source: eLife. 2022 Jun 6;11:e64742. doi: 10.7554/eLife.64742 (PMC9170246; doi:10.7554/eLife.64742)
Supplement: Figure 8—figure supplement 1—source data 1. [file elife-64742-fig8-figsupp1-data1.xlsx]

## Sheet: Sheet1
				Control									CDKO
ISI
20	2.15458	2.05403	1.61837	1.62756	1.93304	1.5904	1.45733	1.21036			2.9535	1.20388	1.32078	1.51165	1.60192	1.40235	1.39787	2.15458
50	2.01809	1.72665	1.58838	1.5636	1.78787	1.41656	0.982479	1.47361			2.67694	1.28106	1.44209	1.55577	1.53661	1.41623	1.41644	2.01809
100	1.64201	1.72372	1.34633	1.40387	1.76874	1.56147	1.56529	1.5668			1.92194	1.35702	1.51802	1.78034	1.77532	1.32726	1.77997	1.64201
200	1.60092	1.5556	1.08569	1.33741	1.45805	1.42918	1.52527	1.47251			1.47352	1.26337	1.4472	1.54693	1.84413	1.41095	1.4954	1.60092
500	1.27574	1.39609	1.02982	1.31166	1.43318	1.13377	1.18051	1.16888			1.13479	1.08636	1.15946	1.28917	1.18317	1.08643	1.61753	1.27574
