# Supplementary material for: Distinct but overlapping roles of LRRTM1 and LRRTM2 in developing and mature hippocampal circuits
Source: eLife. 2022 Jun 6;11:e64742. doi: 10.7554/eLife.64742 (PMC9170246; doi:10.7554/eLife.64742)
Supplement: Figure 8—source data 1. [file elife-64742-fig8-data1.xlsx]

## Sheet: CA1
Control									CDKO
	102.577	98.6324	97.3084	83.8683	84.4605	84.7936	98.6324			91.941	104.907	94.9477	68.84	111.081	86.0378	86.0378
	95.5602	95.212	95.2098	87.0098	120.153	93.4732	95.212			90.5538	109.263	97.2364	86.2646	98.6509	116.065	116.065
	108.23	92.1065	97.3865	104.649	103.941	88.0193	92.1065			94.2402	110.118	94.8684	75.2871	75.7824	133.555	133.555
	86.6902	93.9962	97.53	97.6467	88.902	93.0033	93.9962			97.0718	95.6973	97.2909	78.8704	114.692	89.1072	89.1072
	98.2121	97.0229	92.15	99.7503	80.4201	90.225	97.0229			97.4035	106.996	102.887	69.8105	79.7536	135.116	135.116
	106.565	87.2017	94.603	110.088	76.5092	89.595	87.2017			94.2167	92.0394	102.766	91.9836	92.7211	90.24	90.24
	91.3467	102.158	106.234	105.878	89.5688	88.5027	102.158			95.7247	92.0917	96.805	89.9261	90.323	94.11	94.11
	92.3127	94.5087	98.7905	98.9179	111.882	91.3976	94.5087			94.8612	113.806	102.024	104.219	111.953	109.651	109.651
	109.272	97.2067	96.5085	97.2938	99.1892	96.7781	97.2067			97.8776	98.5077	96.4091	91.925	118	121.94	121.94
	98.9591	101.147	96.8698	107.847	102.797	99.5013	101.147			101.274	95.2681	94.2059	99.4982	127.711	101.554	101.554
	91.9577	96.0213	103.847	102.439	76.1304	88.8052	96.0213			101.24	85.6635	100.66	85.8432	74.9657	114.294	114.294
	93.0376	96.6022	96.2551	108.953	103.208	100.351	96.6022			97.3804	97.0642	109.733	109.009	100.494	105.663	105.663
	90.7116	97.4536	94.642	94.4254	77.4331	102.897	97.4536			103.883	97.5643	89.4155	89.3375	98.9	96.1148	96.1148
	80.578	102.264	106.271	110.065	101.67	100.647	102.264			103.335	100.337	98.4193	121.274	109.648	82.4883	82.4883
	94.1231	99.9031	100.175	95.4193	125.108	102.289	99.9031			97.9834	114.619	98.4658	113.492	86.2024	118.631	118.631
	90.4617	100.909	96.013	99.4348	113.623	91.1787	100.909			100.65	110.728	103.808	99.2486	82.0565	115.21	115.21
	107.968	106.176	95.9062	100.181	115.562	111.899	106.176			100.432	89.5244	101.052	114.995	118.198	82.8597	82.8597
	103.171	100.978	107.374	100.171	91.9144	103.25	100.978			99.0747	103.34	111.195	89.4404	108.85	99.159	99.159
	114.371	97.7187	97.848	103.039	108.83	99.2284	97.7187			98.6256	85.9148	91.6202	104.942	111.38	92.5122	92.5122
	96.8731	101.107	96.1843	97.5966		105.71				102.519	77.4557	92.9236	104.055		125.277	125.277
	378.339	354.755	247.789	300.122	723.62	415.083	236.77			169.821	206.039	286.918	227.494	208.821	187.731	75.8443
	386.921	316.726	237.639	312.17	607.69	406.218	228.892			148.982	198.89	298.751	215.35	261.877	241.481	92.6473
	354.169	298.494	218.32	297.844	540.668	382.633	214.969			141.473	206.31	271.175	195.39	239.295	227.22	35.6003
	347.33	267.554	217.796	274.274	493.717	349.795	213.731			125.539	170.113	234.446	143.677	228.601	191.671	65.4191
	337.176	256.775	210.031	244.568	429.744	312.827	192.92			119.292	150.259	216.442	145.555	217.416	176.394	49.9212
	329.057	245.109	197.552	238.438	415.86	317.141	184.7			112.645	189.135	202.568	140.288	210.388	187.272	11.947
	318.423	230.398	186.121	218.885	423.195	292.125	186.18			112.624	203.691	207.36	127.054	191.669	183.638	53.7843
	306.66	220.464	195.285	227.585	389.067	274.814	188.516			109.649	165.977	197.866	99.954	208.24	165.842	33.9609
	315.606	215.706	186.282	218.748	391.709	292.079	181.792			111.825	167.161	215.173	108.317	192.904	157.085	58.3965
	297.149	221.958	185.302	215.441	340.672	244.228	192.439			106.766	173.808	184.085	101.557	194.062	172.169	78.9496
	302.682	212.485	181.032	207.264	355.942	252.535	184.002			110.665	166.345	185.185	104.306	204.269	175.042	23.8322
	283.264	206.327	181.82	215.024	336.893	264.547	182.387			108.5	177.075	180.261	113.837	198.833	156.343	61.5382
	283.84	203.498	181.335	210.306	318.05	267.188	189.774			110.457	188.917	189.775	92.6925	161.473	154.322	-19.6625
	274.077	196.329	176.584	205.325	329.532	253.743	186.509			113.774	183.521	186.811	93.7776	189.257	150.732	3.27269
	277.812	196.855	176.907	217.313	331.939	237.443	192.219			112.762	187.23	197.337	89.8096	189.196	153.868	20.4863
	263.099	200.416	169.832	210.422	322.145	236.836	181.143			113.828	177.465	189.228	93.7111	163.089	145.444	52.3272
	268.939	206.951	166.277	198.168	307.894	264.281	194.02			113.317	179.111	185.732	78.7936	198.013	162.215	-0.39172
	256.941	198.836	172.911	193.633	349.638	241.918	191.869			115.687	173.535	190.073	85.8067	176.362	136.835	59.5556
	263.228	198.366	170.053	211.613	329.869	241.426	189.578			114.582	179.786	189.492	72.1376	173.861	135.573	85.7915
	268.5	200.483	163.395	196.242	270.997	226.701	188.962			115.842	182.666	202.139	95.4042	162.799	125.868	83.4822
	257.235	191.304	164.593	201.297	279.571	234.358	194.903			115.608	194.547	203.893	85.1517	185.906	143.245	74.3281
	256.78	192.403	163.683	201.06	286.334	213.702	193.237			112.588	189.836	176.096	74.7398	166.746	129.961	70.6769
	235.519	185.229	169.139	191.554	261.6	215.594	195.816			115.644	175.28	185.951	72.6926	171.73	125.93	52.3484
	239.62	195.374	159.807	192.559	293.052	221.956	200.568			112.771	171.148	185.716	82.3005	183.854	128.711	45.8236
	233.987	193.102	168.714	195.847	282.297	212.019	200.405			116.711	194.486	187.758	71.8162	169.034	130.155	75.4817
	239.507	191.059	170.088	195.274	289.583	227.808	198.475			116.718	197.91	181.36	62.1795	177.378	140.085	85.4737
	239.187	189.737	157.153	196.123	281.647	229.865	192.71			115.479	198.976	198.87	83.6138	168.487	122.754	85.8158
	233.217	192.695	161.387	186.66	297.121	222.339	195.828			119.224	187.456	169.633	60.6633	177.082	118.483	58.6967
	228.168	193.391	167.469	193.992	314.022	237.678	196.079			118.765	189.015	182.743	83.5445	166.922	122.929	99.9658
	230.608	188.569	164.426	189.377	314.023	219.515	195.127			116.341	179.457	175.593	72.0566	178.524	142.033	91.6559
	228.879	194.166	159.685	190.477	308.352	224.075	197.473			117.675	183.12	172.331	47.2749	185.353	125.6	89.3026
	229.626	191.913	164.192	190.752	355.145	223.04	201.985			119.624	178.466	179.872	57.6558	198.066	112.596	102.677
	225.445	186.73	158.504	201.937	313.19	235.959	201.384			116.875	195.787	196.01	62.422	160.252	123.612	61.3373
	212.781	188.867	172.947	188.171	312.994	230.98	196.382			114.061	202.322	186.142	82.5489	180.621	127.883	97.5919
	219.72	203.097	162.197	186.59	288.828	227.358	198.032			116.409	200.48	181.654	77.1463	181.745	113.251	98.9464
	210.939	194.794	167.892	194.331	315.854	214.867	191.936			120.435	205.241	176.174	47.5047	166.666	114.162	109.567
	220.278	194.334	163.231	200.052	302.591	232.407	199.743			118.209	202.696	181.293	83.2883	203.612	105.451	90.6589
	215.335	198.103	165.312	201.629	309.969	231.935	203.358			121.797	206.951	178.291	58.0082	179.88	115.341	93.895
	216.082	197.47	158.167	214.565	289.886	226.114	201.524			118.451	194.137	189.806	54.4857	180.136	109.359	99.1634
	220.308	195.527	159.773	203.077	312.528	231.608	211.787			120.965	197.688	163.923	57.7071	187.759	110.062	96.9601
	191.527	196.656	165.772	200.342	313.295	227.586	202.465			122.855	188.985	178.883	51.2039	163.42	115.269	102.543
	209.301	197.799	161.453	186.879	305.528	240.637	204.431			115.368	211.516	173.552	54.0551	166.143	99.3764	122.044
	206.673	191.588	159.284	205.329	321.649	240.778	201.384			116.374	196.467	182.133	48.7936	128.844	108.578	93.7313
	195.175	192.806	161.947	196.093	341.65	255.636	198.545			120.339	204.498	174.341	48.9699	172.99	124.662	86.4678
	206.598	194.082	171.785	191.816	315.435	249.652	210.116			121.169	209.569	167.333	40.8548	186.878	108.749	87.2241
	196.359	199.585	160.829	198.667	332.42	264.269	202.944			118.97	200.1	167.358	32.8138	168.128	106.983	104.478
	197.526	198.301	157.289	199.619	326.831	260.691	209.671			120.003	200.988	159.581	60.2754	154.689	114.788	109.884
	202.293	198.021	168.63	197.524	309.438	252.506	202.615			114.769	210.491	153.668	58.3548	173.395	105.836	88.9723
	197.138	194.954	167.76	202.093	317.813	242.27	199.717			121.968	199.411	159.22	60.9111	175.895	114.034	107.68
	182.91	203.641	160.173	201.486	315.757	231.462	199.051			119.251	211.635	165.219	59.1941	170.936	104.963	112.25
	196.476	204.089	157.822	201.053	292.837	250.938	206.53			118.197	207.859	174.488	41.7559	194.892	109.079	77.0019
	195.279	194.415	174.051	204.485	284.071	247.806	203.937			120.921	196.917	160.603	30.9786	169.832	123.721	81.7764
	208.564	207.156	162.968	193.008	325.987	239.303	197.18			122.372	214.748	159.353	54.6185	166.104	106.806	93.2655
	188.166	230.568	165.315	203.254	310.363	241.255	208.671			120.709	202.655	162.89	28.5501	178.2	102.301	86.3434
	182.673	202.884	170.948	195.961	324.951	251.874	199.05			123.166	174.947	160.256	43.1851	173.23	112.306	90.2229
	194.478	202.25	162.796	199.82	306.715	244.748	211.711			122.186	188.131	169.951	39.8969	189.216	120.163	98.4439
	202.971	210.284	166.006	202.366	344.562	251.847	209.35			120.507	173.514	168.587	49.9055	166.069	106.343	107.156
	178.691	205.98	165.035	198.258	284.638	262.35	204.474			123.854	195.732	145.749	36.474	153.716	91.7166	100.492
	175.541	207.05	169.06	193.041		271.055	208.231			127.75	203.196	148.285	21.3522	146.414	104.92	82.6105
	186.929	221.66	166.024	195.141		280.542	217.148			125.776	199.717	142.908	42.2415	180.708	109.825	82.4886

## Sheet: DG
Control											CDKO
	93.5255	139.303	165.078	106.741	89.1533	92.6698	110.35	121.263	130.817			106.881	116.798	96.5559	94.7084	110.378	98.0376	95.0376
	91.049	82.745	88.8634	102.808	107.349	70.6413	93.1908	96.2424	96.1308			98.1691	53.7503	100.633	112.71	132.631	100.991	107.991
	111.552	121.201	124.394	99.3666	101.194	81.7067	104.102	154.565	111.209			90.8363	118.869	93.9169	96.7591	91.4023	114.697	107.492
	90.4031	110.905	156.283	111.285	92.2398	46.4605	107.692	71.5541	101.926			106.837	117.026	106.033	96.4029	90.8995	75.3462	109.596
	108.68	79.8296	126.105	98.8037	100.356	101.415	98.7293	99.3665	93.2449			80.0573	143.281	103.239	117.312	102.193	80.2688	109.552
	83.1406	55.6553	148.182	112.905	100.671	100.979	50.176	116.925	91.3213			114.348	92.5174	102.109	107.462	129.12	165.652	87.4442
	93.8313	102.993	133.34	110.627	104.773	140.065	117.419	97.233	102.692			89.6537	91.9383	96.0512	92.3339	90.9576	101.096	98.7635
	101.28	103.851	100.762	91.6288	110.138	90.3358	92.0878	88.2752	84.9789			106.445	56.6864	101.261	88.0629	131.382	135.619	97.3755
	103.753	47.8604	59.6572	97.6216	88.4939	120.966	155.604	150.217	92.8632			83.2059	121.678	106.823	77.2128	130.584	101.309	88.9197
	87.1613	81.198	42.2151	109.426	111.352	90.257	119.391	111.096	93.1171			78.9635	130.863	100.625	98.1307	100.396	97.1403	93.9693
	97.0911	111.561	119.367	97.1606	123.321	94.7619	76.2529	99.6885	104.456			96.1733	122.856	86.2709	112.045	93.6897	125.293	97.3032
	91.6399	88.0559	51.2461	97.2562	87.0994	107.093	70.972	100.872	108.848			114.291	67.9382	101.64	112.505	98.0171	106.908	92.5217
	91.1452	104.936	114.296	106.162	111.282	112.72	103.526	110.886	126.502			93.5621	130.889	99.8892	85.1636	88.3068	106.999	111.044
	84.3886	100.259	114.206	85.4361	91.7994	163.202	51.218	61.5604	108.103			101.877	105.89	112.77	75.5425	115.816	115.337	103.52
	110.639	136.212	64.5692	90.96	109.761	103.936	81.281	82.4576	99.2317			104.416	88.124	95.7665	108.101	73.6205	89.488	100.659
	99.066	149.684	34.3298	90.9433	99.7849	68.2257	109.286	94.0092	92.8728			105.203	119.117	103.93	123.826	86.0331	93.1727	102.891
	104.766	79.2283	74.845	91.696	93.2913	115.776	92.5768	89.2114	120.6			112.517	78.5333	109.774	126.385	65.8868	104.665	109.523
	109.334	96.6486	94.4201	105.54	106.686	112.259	114.548	106.832	98.5916			86.5395	48.4767	96.6587	95.1159	106.694	94.0578	95.1839
	103.043	142.843	101.979	97.5434	89.9876	37.3815	107.856	95.7976	106.194			117.703	96.9504	85.7881	96.2679	95.7155	120.792	101.263
	101.242	60.9494	70.518	82.9522	107.439	112.174	127.639	53.0708	63.4481			100.942	60.6301	100.265	95.4356	76.0736	110.212	84.2513
	443.791	342.455	608.269	287.339	211.722	506.849	316.252	327.575	253.464			141.123	489.849	213.554	208.933	234.336	106.439	94.1614
	421.482	283.823	544.557	231.543	178.296	395.353	273.851	262.638	199.563			174.757	447.816	199.693	149.155	196.318	141.898	87.6856
	387.488	276.911	508.582	221.253	167.935	363.208	256.964	246.757	199.533			154.727	387.143	191.728	158.459	151.192	176.633	83.1023
	337.658	264.972	501.49	217.64	160.055	363.577	236.702	232.098	189.437			152.247	369.67	189.344	140.717	154.308	167.513	79.1933
	319.134	234.462	493.716	212.212	163.315	297.653	224.291	231.163	172.998			170.049	249.122	187.106	142.513	145.341	116.282	76.2643
	308.182	273.237	477.288	207.179	158.94	345.765	231.628	240.589	180.376			150.536	289.134	180.197	155.006	151.157	187.418	83.3989
	291.577	237.214	475.375	211.428	155.412	319.69	222.877	237.816	177.22			164.954	199.381	179.064	139.073	132.758	157.398	74.8649
	271.038	239.22	449.063	195.626	152.339	290.785	236.347	219.769	178.46			160.436	279.91	175.644	131.329	130.297	204.697	72.0222
	256.646	209.368	468.749	198.026	148.081	248.478	214.528	213.914	162.465			141.716	202.153	174.606	145.322	140.963	132.511	75.3873
	260.661	233.561	452.933	186.711	148.493	320.066	209.546	176.245	174.277			138.036	248.172	170.732	141.475	122.978	192.394	68.5593
	254.517	248.842	430.024	192.653	146.3	332.18	206.063	201.376	166.431			149.154	220.854	170.22	137.533	102.667	174.886	71.2761
	249.64	235.291	417.29	190.091	141.467	270.757	215.853	179.004	154.359			131.937	221.206	168.268	122.176	124.705	168.822	74.835
	240.877	224.593	429.788	181.495	140.822	259.049	196.412	185.844	175.647			148.144	212.205	161.913	128.637	113.851	178.275	75.5275
	237.944	220.851	429.026	177.041	136.716	212.295	193.795	164.68	154.621			138.746	228.337	158.877	129.155	100.026	161.164	83.6264
	226.101	191.173	393.609	178.089	144.241	210.88	210.948	192.633	157.07			143.342	176.423	160.354	132.77	110.108	147.133	67.3202
	220.882	243.848	413.223	172.08	135.062	232.919	188.223	149.733	149.261			150.629	216.906	153.494	143.56	119.898	159.348	71.9989
	214.484	190.593	391.415	164.856	136.605	241.568	183.198	183.507	155.805			133.146	181.919	153.479	141.717	97.2213	146.061	72.7374
	210.102	239.767	423.369	169.673	133.594	298.412	186.168	181.346	140.68			142.515	155.197	152.062	133.468	113.072	118.089	73.7157
	201.785	215.412	399.82	171.951	136.715	273.796	180.437	164.845	141.377			136.434	183.133	152.591	140.283	108.163	144.927	67.5777
	190.918	216.908	385.361	166.989	138.469	202.037	183.724	154.73	153.032			130.685	201.244	148.964	132.545	110.5	145.029	70.4012
	210.597	206.679	469.662	163.306	129.539	186.773	173.741	167.393	137.726			140.708	223.318	147.107	116.738	95.4951	134.519	68.933
	190.987	230.874	404.684	165.426	133.779	178.675	176.864	165.549	129.559			113.669	172.363	143.909	135.932	115.624	164.214	75.0983
	178.511	202.745	386.448	167.745	129.785	226.288	186.879	179.028	145.219			134.535	180.662	141.021	117.956	114.091	156.183	74.2626
	187.829	211.823	359.632	166.007	136.407	210.245	170.246	160.992	141.716			112.568	203.268	137.504	117.21	115.206	175.83	72.0443
	187.649	244.451	401.494	161.89	126.48	256.106	185.256	154.381	137.358			127.5	180.657	140.716	107.949	106.6	124.132	74.1315
	188.645	186.991	361.389	162.267	130.937	252.729	170.578	134.605	136.985			126.52	192.79	138.761	106.84	84.1442	149.386	69.4689
	190.07	214.119	382.521	161.806	127.137	247.576	181.923	126.408	138.196			127.792	149.243	139.811	112.775	87.4218	120.747	81.2377
	196.055	190.663	361.979	156.021	130.858	170.765	162.498	149.612	118.052			138.826	184.303	138.091	128.012	112.424	131.909	76.0629
	174.485	180.177	356.689	162.081	132.002	241.047	176.761	149.139	147.53			115.02	181.438	136.797	131.792	113.53	158.841	75.5138
	170.835	192.626	369.33	157.096	126.731	247.396	171.019	151.277	151.367			110.686	183.961	137.024	106.377	91.2737	119.79	82.8449
	194.253	222.239	331.151	161.364	128.501	206.831	177.352	138.309	126.431			116.477	143.065	138.217	114.634	100.188	97.3383	68.0021
	196.656	155.47	341.657	151.631	124.274	210.564	163.247	146.509	134.566			113.759	195.959	135.68	124.002	99.1376	139.672	61.5583
	183.053	200.835	364.75	158.356	126.808	202.981	169.225	141.429	138.605			114.405	123.141	132.711	107.853	90.1085	218.176	72.312
	182.43	155.128	359.31	151.565	123.702	247.543	168.106	179.977	134.852			138.404	170.931	132.85	117.668	92.0136	181.578	75.747
	195.346	175.327	335.966	154.927	128.876	204.547	185.949	169.935	130.788			112.599	153.72	132.227	111.631	96.9527	148.707	72.8733
	198.976	194.411	336.757	152.011	124.692	245.353	173.437	150.78	125.598			111.673	130.455	132.234	130.309	81.546	126.178	73.376
	178.779	194.267	321.38	158.63	124.365	197.031	163.211	129.735	132.319			125.406	214.29	137.966	113.686	98.6904	150.691	68.0447
	188.335	226.63	351.51	148.067	125.259	265.122	165.469	141.469	136.293			118.745	144.146	131.79	112.651	94.8904	163.06	80.4502
	186.531	204.439	327.304	154.975	125.141	241.022	162.026	161.244	127.761			129.224	131.779	132.623	125.634	96.5936	143.581	77.1225
	177.672	238.471	349.371	155.893	129.952	214.281	164.031	140.5	125.573			114.65	167.564	129.29	116.311	84.6424	154.506	74.5408
	197.725	172.444	321.837	146.163	121.428	231.726	160.403	149.892	125.653			117.461	145.21	132.016	113.041	88.6298	142.14	80.5957
	188.882	178.711	325.152	152.944	123.992	156.671	173.541	161.11	125.787			133.271	118.33	132.228	111.012	96.6703	172.37	72.9701
	191.856	194.985	376.728	146.032	123.235	185.617	162.824	119.535	121.603			117.419	169.383	133.897	110.765	78.7862	215.682	76.5773
	195.062	200.208	312.235	148.961	128.143	231.153	157.012	123.235	113.454			122.207	117.702	135.17	105.656	92.9953	165.959	78.3266
	189.287	197.676	298.257	150.768	123.097	215.944	175.138	129.704	125.785			137.366	132.494	131.116	114.433	95.5707	167.949	60.9846
	176.777	181.169	277.079	144.135	129.01	239.097	154.842	159.282	117.439			123.814	177.365	129.201	105	93.8705	171.381
	177.121	173.413	317.731	148.296	123.732	186.844	162.833	133.464	115.838			144.633	174.191	128.779	121.791	93.5035	187.199
	191.061	226.152	316.911	145.987	118.629	207.946	152.354	115.83	112.411			121.302	148.235	127.167	113.856	90.9128	228.736
	183.637	245.528	267.686	147.859	122.526	232.952	164.547	121.227	118.799			120.675	160.505	129.319	106.451	85.782	169.032
	187.204	181.26	306.348	141.055	121.358	270.693	157.107	136.677	110.05			123.582	163.227	131.194	105.817	87.5754	157.114
	182.989	190.674	311.812	149.831	123.152	239.074	160.594	132.168	115.582			126.056	185.804	126.065	120.496	99.1807	117.412
	180.065	219.755	324.564	143.887	119.041	217.847	163.852	108.894	120.904			128.219	225.222	127.941	110.447	81.0667	148.997
	179.75	198.056	308.501	152.533	126.252	270.792	146.867	120.987	134.209			133.922	86.9158	125.873	93.0378	86.5962	162.942
	186.51	215.568	309.822	140.914	119.142	186.633	160.925	113.007	109.778			126.867	177.456	124.434	118.091	73.8408	159.483
	189.641	204.352	288.029	146.866	122.743	195.517	169.358	150.393	117.162			130.494	146.469	124.401	94.0137	86.5516	207.161
	195.666	197.562	314.875	139.134	125.446	201.183	175.093	139.481	115.178			124.69	217.624	121.893	116.878	89.167	109.619
	187.241	218.428	322.545	149.467	121.181	250.587	172.883	139.713	100.858			118.857	116.302	120.222	102.83	98.3291	171.841
	177.378	178.935	291.418	139.341	120.514	207.898	175.464	130.72	112.306			111.996	131.351	121.279	91.9245	92.911	134.643
	190.524	183.772	295.202	144.052	118.694	239.684	153.43	153.657	99.8914			135.426	149.044	125.434	102.531	77.8438	141.549
	190.19	215.47	318.741	143.948	120.271	185.277	172.027	170.03	101.883			116.742	155.67	121.198	97.9342	94.9685	145.654
