# Supplementary material for: Distinct but overlapping roles of LRRTM1 and LRRTM2 in developing and mature hippocampal circuits
Source: eLife. 2022 Jun 6;11:e64742. doi: 10.7554/eLife.64742 (PMC9170246; doi:10.7554/eLife.64742)
Supplement: Figure 9—figure supplement 1—source data 1. [file elife-64742-fig9-figsupp1-data1.xlsx]

## Sheet: Rotarod
Latency to fall	Control	cKO
	12	8
	6.66667	6.66667
	6	13
	9	7
	9	7
	9.5	12
	12	7.66667
	8	8.5
	8	8.5
	9	5
		6

## Sheet: OFM
Time spent					Control															CDKO
Inner zone	202.7	89.4	171.4	172.7	70.7	130.8	188	102	88.1	113.5					94.3	132.3	241.1	195	133.5	127.9	109.5	99	85.2	114.6	149.3
outer zone	397.3	510.6	428	423.4	529.3	444.4	412	496.3	508.7	486.5					503.3	467.7	358.9	398.7	466.5	469.2	488.6	501	514.8	485.4	450.7
Total distance	Control	cKO		Avg speed	CONtrol	CKO
	75.4	83.1			0.16	0.139
	74.3	85.5			0.124	0.143
	85.8	71.7			0.136	0.12
	70.4	62.1			0.144	0.105
	79.6	97.3			0.117	0.162
	74.9	77.8			0.138	0.13
	88.9	96.5			0.125	0.161
	92.2	109.4			0.149	0.182
	67.8	69			0.155	0.116
	81.4	50.6			0.113	0.084
		65.6				0.106

## Sheet: EPM
Entries in open arms	control	cKO		Time in open arms/closed arms	Control	cKO		Distance	CONTROL	CKO		Speed	CONTROL	CKO
	13	10			0.472031	0.321004			35.3	31.3			0.059	0.052
	19	19			0.948052	0.439194			35	24.9			0.058	0.042
	13	13			0.512097	0.257071			30.3	34.1			0.051	0.057
	16	14			0.625576	0.287719			36.9	37.3			0.062	0.062
	12	14			0.300175	0.44648			23.3	46.6			0.044	0.078
	19	21			0.748252	0.338389			46.4	34.3			0.069	0.057
	25	19			0.455251	0.343183			27.5	24.7			0.046	0.041
	15	17			0.280514	0.30662			54.9	58.8			0.092	0.047
	17	16			0.240033	0.545079			40.1	28.2			0.067	0.098
		12				0.325623			35.1	31.3			0.059	0.051
		24				0.527408				38				0.053
		17				0.304348
