# Supplementary material for: Distinct but overlapping roles of LRRTM1 and LRRTM2 in developing and mature hippocampal circuits
Source: eLife. 2022 Jun 6;11:e64742. doi: 10.7554/eLife.64742 (PMC9170246; doi:10.7554/eLife.64742)
Supplement: Figure 9—source data 1. [file elife-64742-fig9-data1.xlsx]

## Sheet: Social
Session1					Empty chamber													Mouse chamber
Control	234	181	53	193	173	209	169	263	153	213			276	339	434	236	283	294	347	271	310	285
cDKO	118	196	254	120	181	184	266	216	64	56	258		394	307	290	353	300	278	231	249	417	429	272
Session 2					Familiar mice													Novel mice
Control	190	213	308	193	236	184	230	263	269	182			317	292	235	337	275	322	338	242	171	350
cDKO	340	243	200	162	236	206	230	240	261	227	170		179	278	355	376	247	281	311	282	200	273	322

## Sheet: CFC
Freezing	WT	cDKO		Rearing	WT	cDKO		Speed	CONTROL	CKO
	20.6667	19.4167			30.6667	0.723333			0.062	0.115
	7.33333	20.5833			23.6667	1.2			0.122	0.19
	16.25	11.4167			21	11			0.12	0.13
	30.9167	3.83333			18.3333	2.66667			0.205	0.088
	26.0833	8.58333			1	4.66667			0.208	0.058
	7.33333	26.25			24.6667	1.93333			0.21	0.099
	23.9167	0			2.33333	2.8			0.124	0.105
	18.5	14.25			17	6			0.505	0.223
	52.5	5.25			12.6667	0.233333			0.025	0.138
	4.83333				21.3333	4			0.135	0.202
	67.5833					9.33333			0.222
	81.9167
	57.8333
	69.8333
